# Supplementary material for: Identification of bona fide B2 SINE retrotransposon transcription through single-nucleus RNA-seq of the mouse hippocampus
Source: HighWire-hosted journal article supplement (doi:10.1101/gr.262196.120), 2020-10-29
Supplement: Supplemental_Fig_S1.pdf [file Supplemental_Fig_S1.pdf]

A

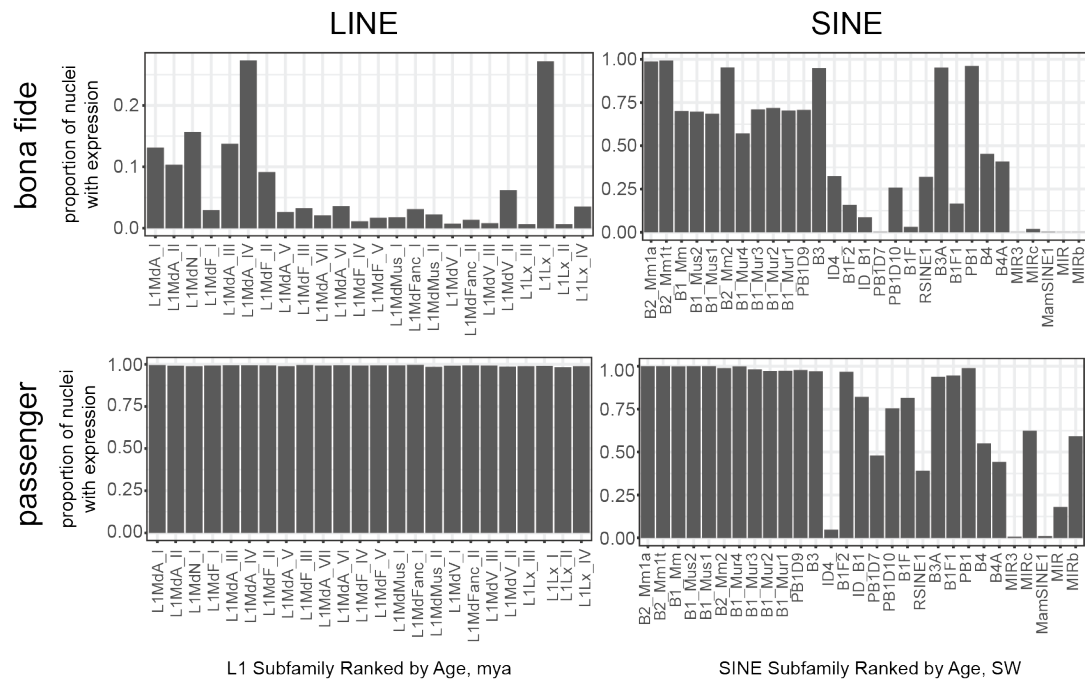

**Supplemental Figure 1. Distribution of LINE and SINE element expression**

(A) Proportion of nuclei expressing a given subfamily in either the *bona fide* counts table or the passenger counts table. LINE subfamilies were ranked by age in million years ago as calculated in Sookdeo et al. (2013). SINE subfamilies were ranked by a proxy estimate of the average Smith Waterman divergence for all elements in the subfamily from the respective consensus, normalized for element length.
