# Supplementary material for: Identification of bona fide B2 SINE retrotransposon transcription through single-nucleus RNA-seq of the mouse hippocampus
Source: HighWire-hosted journal article supplement (doi:10.1101/gr.262196.120), 2020-10-29
Supplement: Supplemental_Fig_S2.pdf [file Supplemental_Fig_S2.pdf]

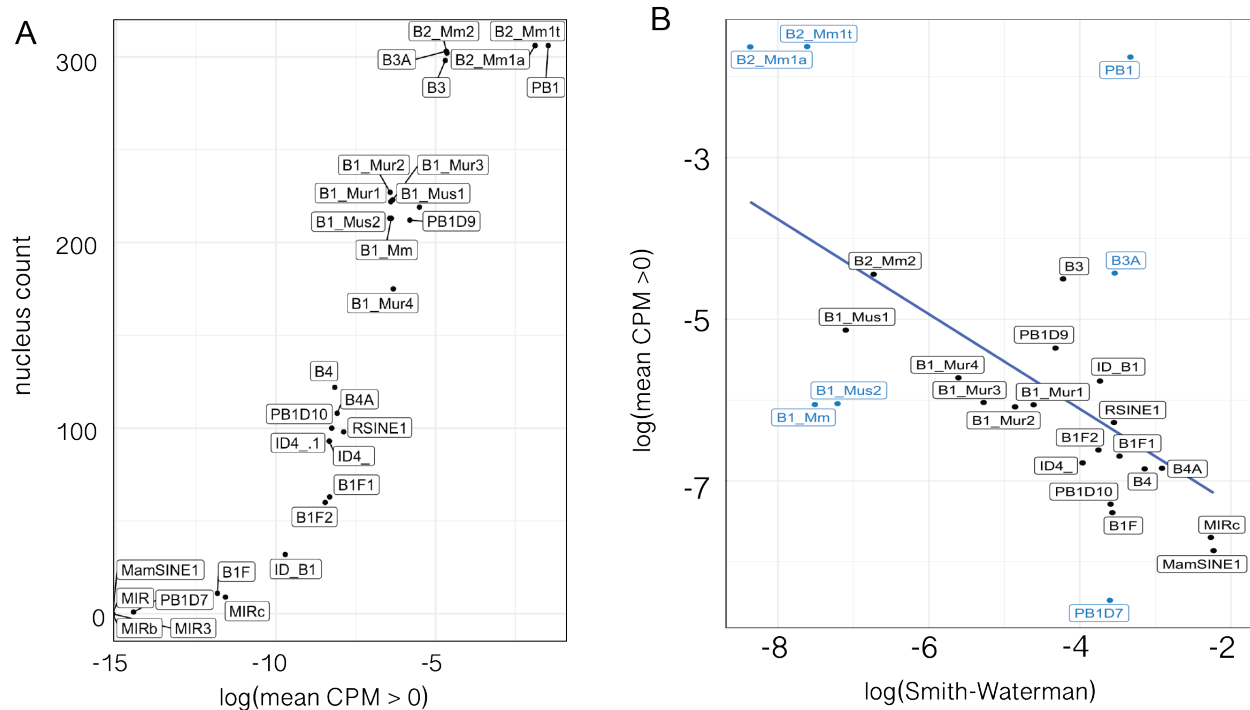

**Supplemental Figure 2. Prevalence of SINE elements in mouse hippocampal data**

(A) Prevalence of SINE elements across nuclei as a function of mean expression (CPM) given that the nucleus expressed the SINE element (mean expression where expression > 0). (B) Mean expression (CPM) as in A as a function of the average subfamily age, estimates as log(Smith-Waterman score normalized by average element length). Blue names indicate subfamilies where the expression is greater than 1.5 units away from expectation given the trend line.
