# Supplementary material for: Identification of bona fide B2 SINE retrotransposon transcription through single-nucleus RNA-seq of the mouse hippocampus
Source: HighWire-hosted journal article supplement (doi:10.1101/gr.262196.120), 2020-10-29
Supplement: Supplemental_Fig_S3.pdf [file Supplemental_Fig_S3.pdf]

A

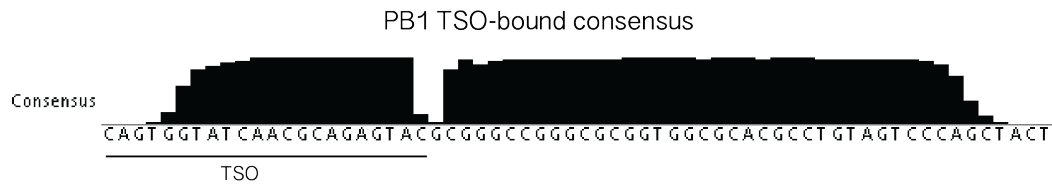

B

|                  | TSO                                                          | A-box                   |    |
|------------------|--------------------------------------------------------------|-------------------------|----|
| TSO-bound        | CAGTGGTATCAACGCAGAGTACGCGGGCCGGGCGCGGTGGCGCACGCCTGTAGTCCCAGC | TGGCGCACGCCTGTAGTCCCAGC | 60 |
| PB1_repeatmasker | -----AGCCGGGCGCGGTGGCGCACGCCTGTAGTCCCAGC                     | TGGCGCACGCCTGTAGTCCCAGC | 35 |
| B1_repeatmasker  | -----AGCCGGGCAGTGGTGGCGCACGCCTTTAATCCCAGC                    | TGGCGCACGCCTTTAATCCCAGC | 36 |
|                  |                                                              | * * * * *               |    |

C

|               |                                                              |       |
|---------------|--------------------------------------------------------------|-------|
| PB1_REPMASKER | -----AGCCGGGCGCGGTGGCGCACGCCTGTAGTCCCAGC                     | 35    |
| 7SL           | -----GCCGGGCGCGGTGGCGCACGCCTGTAGTCCCAGC                      | 34    |
| TSO-BOUND     | CAGTGGTATCAACGCAGAGTACGCGGGCCGGGCGCGGTGGCGCACGCCTGTAGTCCCAGC | 60    |
|               | TSO                                                          | ***** |
| PB1_REPMASKER | TACTCGGGAGGCTGAGGCAGGAGGATCACTTGAGTCCAGGAGTTCGAGGCCAGCCTGGGC | 95    |
| 7SL           | TACTCGGGAGGCTGAGACAGGAGGATCGCTTGAGTCCAGGAGTTCGAGGCCAGCCTGGGC | 94    |
| TSO-BOUND     | TACT-----                                                    | 64    |
|               | ****                                                         |       |

### Supplemental Figure 3. Expressed Proto-B1 sequence in hippocampal neurons

(A) Consensus sequence of the TSO-bound PB1 sequence within hippocampal snRNA-seq data.

(B) Alignment of TSO-bound PB1 consensus sequence from snRNA-seq data, the consensus PB1 sequence from the repeat masker library, and the B1 sequence from the repeat masker library. A-box sequence is noted in red. \* = 100% identity between the three sequences. (C) Alignment of the TSO-bound PB1 consensus sequence from snRNA-seq data, the consensus PB1 sequence from the repeat masker library, and the 7SL sequence from the mm10 reference genome. \* = 100% identity between the three sequences.
