# Supplementary material for: Identification of bona fide B2 SINE retrotransposon transcription through single-nucleus RNA-seq of the mouse hippocampus
Source: HighWire-hosted journal article supplement (doi:10.1101/gr.262196.120), 2020-10-29
Supplement: Supplemental_Fig_S4.pdf [file Supplemental_Fig_S4.pdf]

A

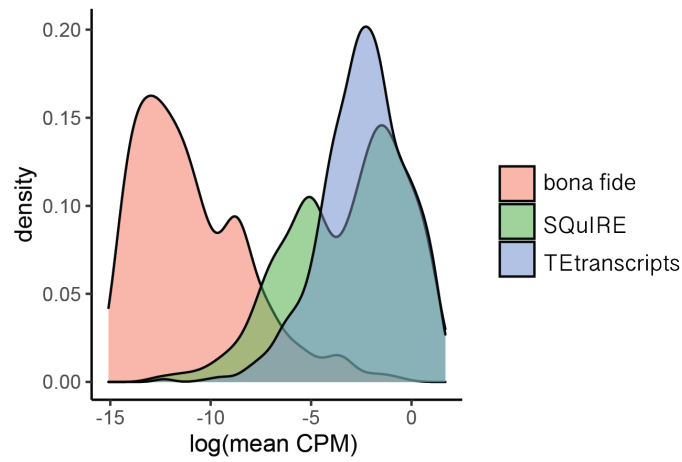

B

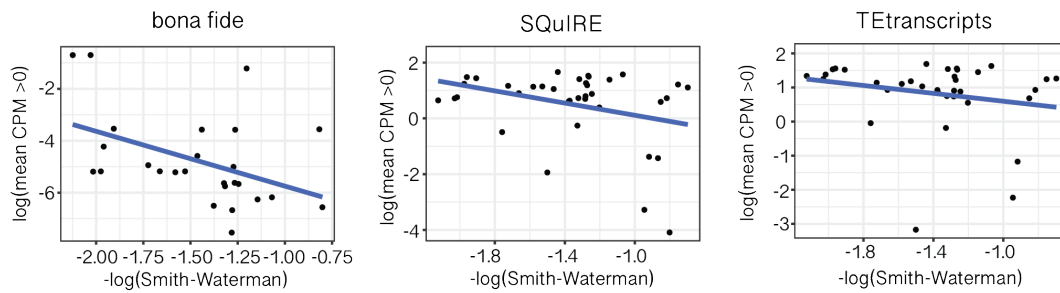

C

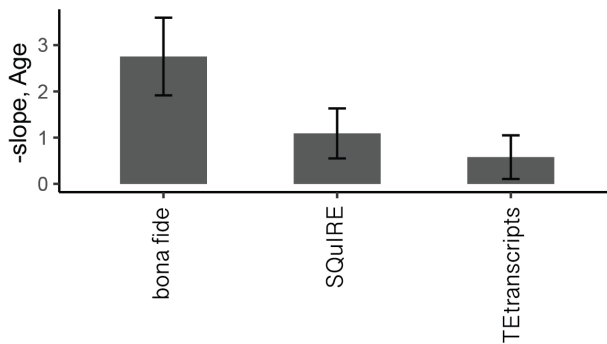

**Supplemental Figure 4. Comparison of bona fide elements to counts based on SQuIRE and TEtranscripts**

(A) Density plot of the mean expression for each element. (B) Mean expression of each element as a function of Smith-Waterman distance from the respective consensus sequence. (C) The slope associated with each line plotted in B.
