# Supplementary material for: Identification of bona fide B2 SINE retrotransposon transcription through single-nucleus RNA-seq of the mouse hippocampus
Source: HighWire-hosted journal article supplement (doi:10.1101/gr.262196.120), 2020-10-29
Supplement: Supplemental_Fig_S5.pdf [file Supplemental_Fig_S5.pdf]

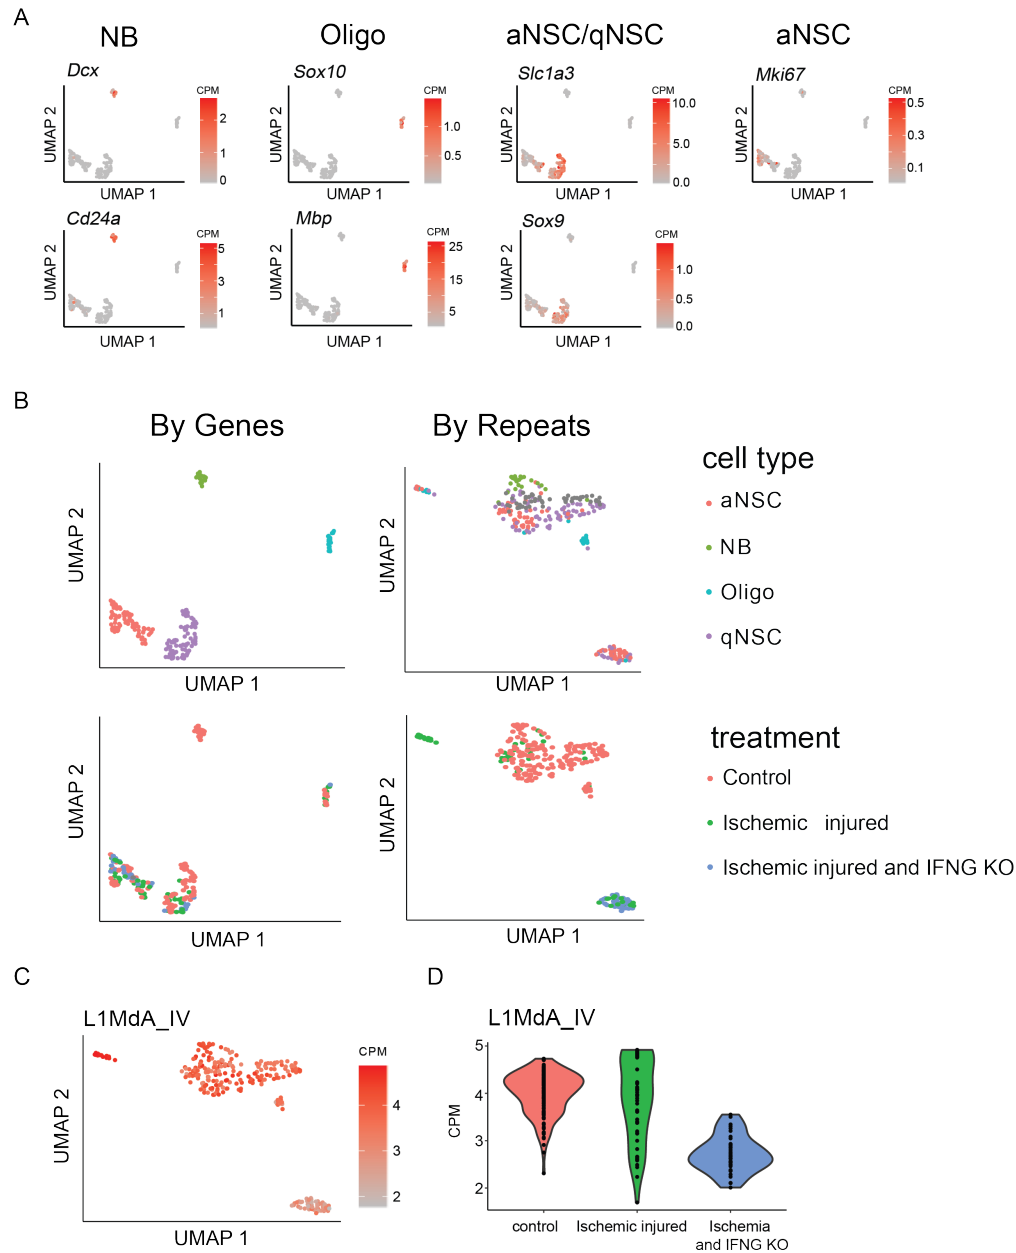

### Supplemental Figure 5. Repeat analysis in neural stem cells from the mouse subventricular zone

(A) Expression of key cell type marker genes overlaid on UMAP coordinates derived from gene expression of neural stem cells (NSCs) derived from the mouse subventricular zone (SVZ) (GSE67833). NB = Neuroblast, Oligo = Oligodendrocyte, aNSC = activated neural stem cell, qNSC = quiescent neural stem cell. (B) UMAP plot of NSCs given gene (left) or repeat (right) expression data. Top: colored by cell type, bottom: colored by condition. (C) Expression of L1MdA\_IV overlaid on UMAP plot given repeat expression values. (D) Expression of L1MdA\_IV as a function of treatment condition.
