# Supplementary material for: Identification of bona fide B2 SINE retrotransposon transcription through single-nucleus RNA-seq of the mouse hippocampus
Source: HighWire-hosted journal article supplement (doi:10.1101/gr.262196.120), 2020-10-29
Supplement: Supplemental_Fig_S6.pdf [file Supplemental_Fig_S6.pdf]

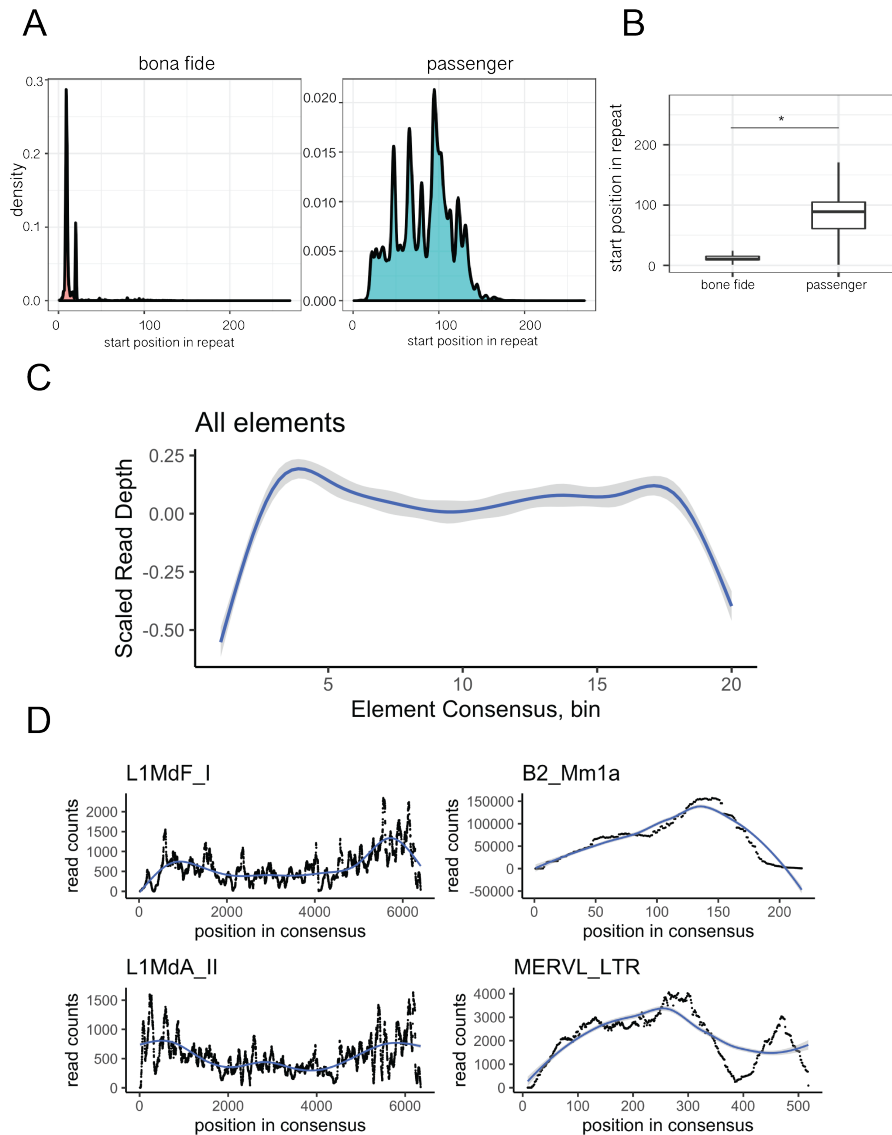

### Supplemental Figure 6. TE distribution

(A) Distribution of the position in the respective consensus sequence where each short read aligns. (B) Boxplot of the position in the respective consensus sequence where each short read aligns. \* = Student's t-test p-value < 0.05. (C) Read depth calculated by pileup for all TE elements. X-axis was first scaled by the length of the respective element and then divided into bins (D) Read depth calculated by pileup for individual TE subfamilies.
