# Supplementary material for: Identification of bona fide B2 SINE retrotransposon transcription through single-nucleus RNA-seq of the mouse hippocampus
Source: HighWire-hosted journal article supplement (doi:10.1101/gr.262196.120), 2020-10-29
Supplement: Supplemental_Fig_S7.pdf [file Supplemental_Fig_S7.pdf]

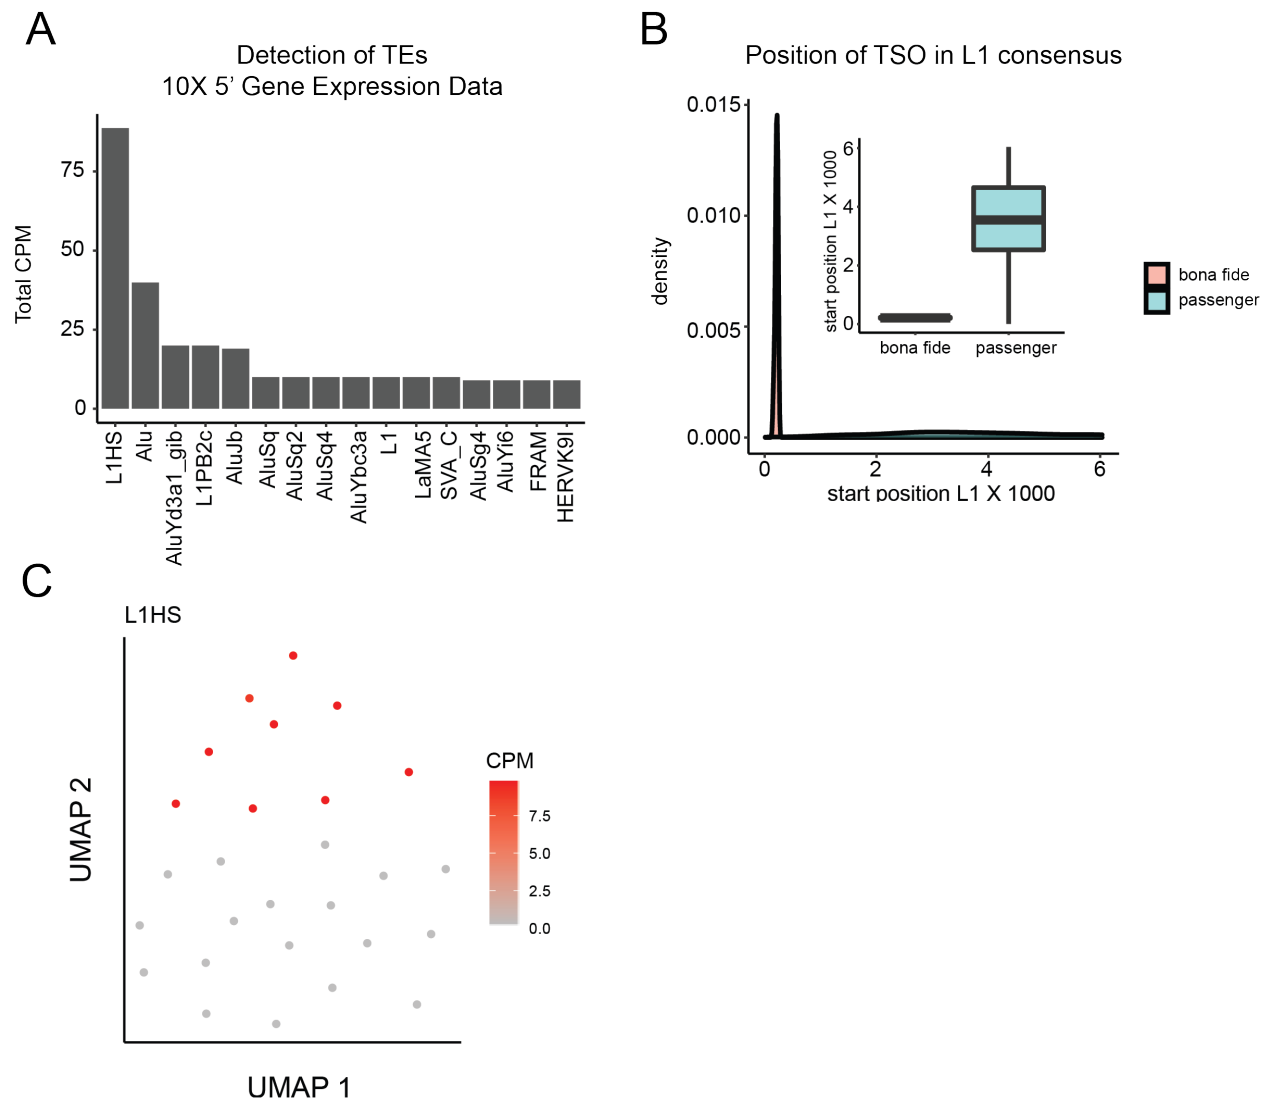

**Supplemental Figure 7. Detection of TEs in human 5' Gene Expression data from 10X**

(A) Total CPM estimates for bona fide TEs identified in GEO data file SRR6798781. (B) Density plot of the start position in the L1 consensus sequence where the TSO sequence was identified. Pink = *bona fide*, blue = passenger. Inset = Information plotted as a boxplot. (C) UMAP plot of cells that contain at least one detectable TE element, colored by L1HS expression.
