# Supplementary material for: Identification of bona fide B2 SINE retrotransposon transcription through single-nucleus RNA-seq of the mouse hippocampus
Source: HighWire-hosted journal article supplement (doi:10.1101/gr.262196.120), 2020-10-29
Supplement: Supplemental_Table_S1.xlsx [file Supplemental_Table_S1.xlsx]

## Sheet: Legend_S1
Supplemental Table S1. Association with B2_Mm1t expression
estimate_int	y-intercept
estimate_B2_mm1t	slope as a function of B2_Mm1t expression
err_int	error associated with the intercept term
err_B2_mm1t	error associated with the B2_Mm1t term
t_int	t-value, intercept
t_B2_mm1t	t-value, B2_Mm1t
p_int	p-value, intercept
p_B2_mm1t	p-value, B2_Mm1t
padj_B2_mm1t	FDR adjusted B2_Mm1t p-value

## Sheet: Supplemental_Table_S1
Gene/Repeat Symbol	estimate_int	estimate_B2_mm1t	err_int	err_B2_mm1t	t_int	t_B2_mm1t	p_int	p_B2_mm1t	padj_B2_mm1t
B2_Mm1t	1.32661e-32	1	3.64687e-17	3.65515e-17	3.63767e-16	2.73586e+16	1	0	0
B2_Mm1a	1.48526e-16	0.971976	0.0158493	0.0158853	9.37113e-15	61.1871	1	1.09683e-139	3.03766e-135
H2-T23	5.75723e-17	0.677256	0.0496046	0.0497172	1.16062e-15	13.6222	1	5.14993e-31	1.42622e-26
PB1	1.05024e-16	-0.484278	0.0589873	0.0591212	1.78045e-15	-8.19127	1	2.1398e-14	5.92574e-10
Malat1	-1.64354e-15	0.481878	0.0590766	0.0592107	-2.78205e-14	8.13837	1	2.99412e-14	8.29131e-10
4.5SRNA	-1.85738e-16	-0.467672	0.0595933	0.0597286	-3.11677e-15	-7.82997	1	2.07494e-13	5.74572e-09
Tapbpl	1.93178e-16	0.466708	0.0596276	0.059763	3.23974e-15	7.80932	1	2.35876e-13	6.53141e-09
Exosc2	-1.65379e-16	0.463864	0.0597284	0.059864	-2.76885e-15	7.74863	1	3.43447e-13	9.50971e-09
Neurod6	2.37587e-16	0.453333	0.0600948	0.0602313	3.95354e-15	7.52653	1	1.34019e-12	3.7107e-08
Snf8	-2.49233e-16	0.438065	0.0606074	0.060745	-4.11226e-15	7.21155	1	8.89485e-12	2.46272e-07
9530059O14Rik	2.78942e-17	0.433771	0.0607476	0.0608855	4.59182e-16	7.12437	1	1.48949e-11	4.12381e-07
Myo1c	1.54711e-16	0.428998	0.0609015	0.0610397	2.54034e-15	7.02818	1	2.61957e-11	7.25228e-07
B3	3.48513e-17	0.416661	0.0612896	0.0614287	5.68633e-16	6.78283	1	1.08276e-10	2.9975e-06
Sv2b	-4.06078e-16	0.406381	0.0616025	0.0617424	-6.5919e-15	6.58187	1	3.3827e-10	9.36432e-06
Prox1	5.85472e-16	-0.401092	0.0617599	0.0619001	9.4798e-15	-6.47966	1	5.98832e-10	1.65769e-05
Dkk3	4.003e-16	0.400218	0.0617857	0.0619259	6.47885e-15	6.46284	1	6.57487e-10	1.81999e-05
Unc13d	1.31046e-16	0.386827	0.0621721	0.0623133	2.1078e-15	6.20779	1	2.66031e-09	7.36374e-05
Mrpl13	-1.80755e-16	0.386644	0.0621773	0.0623185	-2.90709e-15	6.20433	1	2.71049e-09	7.50237e-05
Sema3e	6.53956e-17	0.376644	0.0624557	0.0625975	1.04707e-15	6.01692	1	7.391e-09	0.000204568
Uchl5	-1.51581e-17	0.367577	0.0627008	0.0628431	-2.41753e-16	5.84912	1	1.78296e-08	0.000493471
Cul9	-2.28029e-16	0.366636	0.0627258	0.0628682	-3.63533e-15	5.83182	1	1.95056e-08	0.000539836
B3A	-1.236e-16	0.362453	0.0628362	0.0629789	-1.96701e-15	5.75515	1	2.89822e-08	0.000802082
Polr2l	8.5431e-17	0.359839	0.0629045	0.0630473	1.35811e-15	5.70745	1	3.70095e-08	0.0010242
Prkcg	1.00342e-16	0.359002	0.0629262	0.0630691	1.5946e-15	5.6922	1	4.00078e-08	0.00110713
Rprml	3.99061e-16	0.358747	0.0629328	0.0630757	6.34107e-15	5.68756	1	4.09653e-08	0.00113359
B2_Rn2	1.00229e-16	0.355219	0.0630237	0.0631668	1.59034e-15	5.62351	1	5.67163e-08	0.0015694
Slc9a2	-2.02248e-16	0.354667	0.0630378	0.0631809	-3.20836e-15	5.61351	1	5.96576e-08	0.00165072
Alpk2	1.30009e-16	0.352095	0.0631033	0.0632466	2.06025e-15	5.56702	1	7.54054e-08	0.00208639
Gad1	8.18456e-16	-0.351838	0.0631099	0.0632531	1.29688e-14	-5.56238	1	7.71859e-08	0.00213558
Thsd7a	1.9116e-16	-0.350839	0.0631351	0.0632785	3.02779e-15	-5.54437	1	8.44826e-08	0.00233738
Pdlim7	-1.68772e-16	0.350302	0.0631487	0.0632921	-2.67261e-15	5.53469	1	8.8679e-08	0.00245339
B2L_S	1.09057e-16	-0.34926	0.0631749	0.0633183	1.72628e-15	-5.51593	1	9.73924e-08	0.00269436
Fam19a1	-3.63082e-16	0.34568	0.0632644	0.063408	-5.73912e-15	5.45168	1	1.34046e-07	0.00370825
Gm26580	1.89508e-16	0.343863	0.0633094	0.0634531	2.99337e-15	5.41917	1	1.57404e-07	0.00435426
Sfxn3	9.98797e-17	0.343513	0.063318	0.0634617	1.57743e-15	5.41291	1	1.62333e-07	0.00449045
Pcnxl2	-2.42727e-16	0.343357	0.0633218	0.0634656	-3.83323e-15	5.41012	1	1.6458e-07	0.00455245
Pcgf2	1.59549e-16	0.340977	0.0633803	0.0635242	2.51733e-15	5.36767	1	2.02725e-07	0.00560738
Gm23617	2.86487e-16	0.340264	0.0633977	0.0635416	4.51888e-15	5.35497	1	2.15725e-07	0.00596673
Ttc26	2.68652e-18	0.339932	0.0634058	0.0635497	4.23702e-17	5.34908	1	2.22032e-07	0.00614096
Nr4a3	-7.94813e-17	0.33933	0.0634204	0.0635644	-1.25324e-15	5.33837	1	2.33946e-07	0.00647024
Rmi2	-6.45522e-17	0.33909	0.0634263	0.0635703	-1.01775e-15	5.3341	1	2.3887e-07	0.0066062
Gria3	-6.46576e-17	0.335559	0.0635116	0.0636558	-1.01804e-15	5.27146	1	3.23772e-07	0.00895391
B2_Rat3	3.98824e-17	0.335081	0.0635231	0.0636673	6.27842e-16	5.263	1	3.37281e-07	0.00932718
Itgbl1	9.98234e-18	0.334163	0.063545	0.0636893	1.57091e-16	5.24677	1	3.64742e-07	0.0100862
Prdm10	-6.85291e-17	0.33096	0.0636212	0.0637656	-1.07714e-15	5.19026	1	4.78399e-07	0.0132287
B2_RnY	-1.24558e-16	0.330365	0.0636352	0.0637797	-1.95738e-15	5.17978	1	5.02959e-07	0.0139073
Gm20406	-2.44061e-16	0.329944	0.0636452	0.0637896	-3.83472e-15	5.17237	1	5.21057e-07	0.0144072
Brd9	3.22349e-17	0.329078	0.0636655	0.0638101	5.06317e-16	5.15714	1	5.60263e-07	0.0154907
Tbata	9.57016e-17	0.328652	0.0636755	0.0638201	1.50296e-15	5.14966	1	5.80577e-07	0.0160518
Dock9	1.44236e-16	0.328358	0.0636824	0.063827	2.26493e-15	5.1445	1	5.9497e-07	0.0164491
Ntsr2	2.09241e-17	0.325443	0.0637504	0.0638951	3.28219e-16	5.0934	1	7.57816e-07	0.0209506
Sec24a	1.44147e-16	0.325365	0.0637522	0.0638969	2.26104e-15	5.09203	1	7.62719e-07	0.0210854
B2_Rn1	1.21631e-16	0.321634	0.0638382	0.0639831	1.90529e-15	5.02685	1	1.03569e-06	0.0286306
R3hdm1	5.37937e-16	0.320162	0.0638719	0.0640169	8.42213e-15	5.00121	1	1.16726e-06	0.0322664
Sema5a	2.66825e-16	-0.317908	0.063923	0.0640681	4.17417e-15	-4.96204	1	1.39997e-06	0.0386981
Pvrl3	1.1777e-16	0.317396	0.0639346	0.0640797	1.84204e-15	4.95315	1	1.45873e-06	0.0403208
2210408I21Rik	-6.77607e-16	0.316835	0.0639472	0.0640924	-1.05963e-14	4.94341	1	1.52582e-06	0.0421736
Bcl11a	1.12148e-16	0.316703	0.0639502	0.0640954	1.75368e-15	4.94111	1	1.5421e-06	0.042622
Homer3	-1.69786e-16	0.316338	0.0639584	0.0641036	-2.65463e-15	4.93479	1	1.58776e-06	0.0438826
Wsb2	-1.69822e-16	0.315136	0.0639854	0.0641306	-2.65408e-15	4.91398	1	1.74734e-06	0.0482912
Stxbp5l	1.06486e-16	0.314658	0.0639961	0.0641413	1.66394e-15	4.90569	1	1.81509e-06	0.0501617
Gm16702	-9.32517e-18	0.312836	0.0640366	0.064182	-1.45622e-16	4.8742	1	2.09664e-06	0.0579405
Reep6	-1.17668e-16	0.311023	0.0640768	0.0642222	-1.83636e-15	4.84292	1	2.41786e-06	0.0668151
Pex5l	-2.74535e-16	0.309821	0.0641032	0.0642488	-4.2827e-15	4.82221	1	2.65612e-06	0.0733967
Il11	4.42359e-16	0.308137	0.0641401	0.0642857	6.89675e-15	4.79324	1	3.028e-06	0.0836697
Schip1	-1.32216e-17	0.307403	0.0641561	0.0643018	-2.06084e-16	4.78063	1	3.20509e-06	0.0885599
Rsrp1	-3.3437e-16	0.306823	0.0641687	0.0643144	-5.21079e-15	4.77067	1	3.3519e-06	0.0926129
1700064H15Rik	1.73449e-16	0.306271	0.0641807	0.0643264	2.70251e-15	4.7612	1	3.49766e-06	0.0966369
Brinp2	3.90031e-17	0.305644	0.0641943	0.06434	6.07579e-16	4.75045	1	3.67041e-06	0.101406
Rgs11	-3.56942e-17	0.305122	0.0642056	0.0643514	-5.55936e-16	4.7415	1	3.82062e-06	0.105552
Amigo2	-8.23743e-17	0.304987	0.0642085	0.0643543	-1.28292e-15	4.73918	1	3.86046e-06	0.106649
Gm26909	9.08972e-18	0.304282	0.0642237	0.0643695	1.41532e-16	4.72712	1	4.07434e-06	0.112554
Peak1	-3.04591e-16	0.303698	0.0642363	0.0643821	-4.74172e-15	4.71711	1	4.26033e-06	0.117687
Prodh2	2.40032e-17	0.303517	0.0642402	0.064386	3.73648e-16	4.71403	1	4.31935e-06	0.119313
D130051D11Rik	2.85388e-16	0.303465	0.0642413	0.0643871	4.44243e-15	4.71313	1	4.33669e-06	0.119788
Adarb2	2.0813e-17	-0.303278	0.0642453	0.0643912	3.23961e-16	-4.70993	1	4.39897e-06	0.121504
Tiam1	-1.28501e-16	-0.301618	0.0642808	0.0644267	-1.99905e-15	-4.68157	1	4.9898e-06	0.137818
Grik1	3.95738e-17	-0.30025	0.0643099	0.0644559	6.15361e-16	-4.65822	1	5.53306e-06	0.152818
Gpt2	-1.03082e-16	0.299293	0.0643302	0.0644762	-1.60239e-15	4.64191	1	5.94572e-06	0.164209
Cyp2e1	1.02461e-15	0.299115	0.064334	0.06448	1.59264e-14	4.63888	1	6.02577e-06	0.166414
Gm28417	-1.09634e-16	0.298722	0.0643423	0.0644883	-1.70391e-15	4.63218	1	6.20587e-06	0.171381
Pkp2	5.37173e-17	0.29821	0.0643531	0.0644992	8.34728e-16	4.62347	1	6.4483e-06	0.17807
2010111I01Rik	-1.70366e-16	0.296912	0.0643803	0.0645265	-2.64625e-15	4.6014	1	7.10345e-06	0.196155
Adcy9	-1.33031e-16	0.296749	0.0643838	0.0645299	-2.06621e-15	4.59863	1	7.19018e-06	0.198542
Mical2	8.83736e-18	0.295834	0.0644029	0.0645491	1.3722e-16	4.58309	1	7.69535e-06	0.212484
Pde1a	-6.58492e-17	0.29567	0.0644063	0.0645525	-1.0224e-15	4.58029	1	7.7897e-06	0.215082
Hs3st4	-3.19824e-16	0.29375	0.0644462	0.0645925	-4.96265e-15	4.54774	1	8.97478e-06	0.247794
Spink8	5.76336e-16	0.293069	0.0644603	0.0646067	8.94093e-15	4.53621	1	9.43501e-06	0.260491
Synpr	4.54274e-16	-0.292996	0.0644618	0.0646082	7.04718e-15	-4.53497	1	9.48553e-06	0.261877
Fxyd6	3.49727e-16	-0.292735	0.0644672	0.0646136	5.42488e-15	-4.53054	1	9.66917e-06	0.266937
Erbb4	4.6922e-16	-0.292654	0.0644689	0.0646153	7.27824e-15	-4.52918	1	9.72645e-06	0.268508
Far1	-6.96814e-17	0.292387	0.0644744	0.0646208	-1.08076e-15	4.52466	1	9.91848e-06	0.2738
B2_Rn	1.99165e-16	0.292119	0.0644799	0.0646263	3.08879e-15	4.52012	1	1.01148e-05	0.27921
Plxna1	7.70476e-16	0.291989	0.0644826	0.064629	1.19486e-14	4.51793	1	1.0211e-05	0.281853
Rnf182	9.8316e-17	0.291169	0.0644995	0.0646459	1.52429e-15	4.50405	1	1.08406e-05	0.299222
Fam193a	1.87926e-16	0.290904	0.0645049	0.0646513	2.91336e-15	4.49958	1	1.10515e-05	0.305031
Echdc2	6.4696e-17	0.290725	0.0645086	0.064655	1.00291e-15	4.49655	1	1.11964e-05	0.309022
Kcnn2	2.77515e-16	0.289936	0.0645247	0.0646712	4.30092e-15	4.48324	1	1.18557e-05	0.327206
Dlg1	-6.31496e-18	0.288604	0.0645518	0.0646984	-9.78277e-17	4.46077	1	1.30541e-05	0.360266
Ociad2	-6.23524e-17	0.287727	0.0645696	0.0647162	-9.65662e-16	4.44599	1	1.39046e-05	0.383724
Gm12853	5.15216e-17	0.287208	0.0645801	0.0647267	7.97794e-16	4.43724	1	1.44326e-05	0.398281
Slc17a7	-1.59455e-16	0.287172	0.0645809	0.0647275	-2.46908e-15	4.43663	1	1.44704e-05	0.399309
Lmo7	8.32408e-17	0.286519	0.064594	0.0647407	1.28868e-15	4.42563	1	1.51635e-05	0.418423
Magt1	7.95036e-17	0.286417	0.0645961	0.0647427	1.23078e-15	4.42392	1	1.52742e-05	0.42146
Lrrtm4	1.38532e-17	-0.286258	0.0645993	0.064746	2.14448e-16	-4.42125	1	1.54488e-05	0.426262
Kcnip2	5.46243e-16	0.285719	0.0646101	0.0647568	8.45445e-15	4.41219	1	1.60544e-05	0.442958
Gm5746	2.74563e-16	0.284843	0.0646277	0.0647744	4.24837e-15	4.39747	1	1.70874e-05	0.471443
Rpn2	-2.45413e-16	0.284709	0.0646304	0.0647771	-3.79717e-15	4.3952	1	1.72519e-05	0.475963
Dzip1	-6.63635e-16	0.284537	0.0646339	0.0647806	-1.02676e-14	4.39231	1	1.74641e-05	0.481801
Gfpt2	-1.9892e-16	-0.283919	0.0646462	0.064793	-3.07705e-15	-4.38195	1	1.82456e-05	0.50334
Igsf3	-7.17956e-16	-0.283879	0.064647	0.0647938	-1.11058e-14	-4.38127	1	1.82981e-05	0.504771
Htr1f	3.53876e-16	0.283643	0.0646517	0.0647985	5.47357e-15	4.37731	1	1.86057e-05	0.513238
B2_Rat4	-8.11498e-17	0.283478	0.064655	0.0648018	-1.25512e-15	4.37455	1	1.88239e-05	0.519239
Opcml	-8.86217e-17	0.283354	0.0646575	0.0648043	-1.37063e-15	4.37245	1	1.89906e-05	0.523817
Camk1d	6.07382e-17	0.283235	0.0646598	0.0648066	9.39349e-16	4.37046	1	1.91507e-05	0.528214
Trpc6	-1.20482e-16	-0.283168	0.0646612	0.064808	-1.86327e-15	-4.36935	1	1.92408e-05	0.530681
Khdrbs3	-3.50026e-16	0.282746	0.0646696	0.0648164	-5.41253e-15	4.36226	1	1.98232e-05	0.546723
Hgf	-3.44434e-16	0.282443	0.0646756	0.0648224	-5.32556e-15	4.35718	1	2.02505e-05	0.558489
Gm9017	6.50674e-16	0.281577	0.0646927	0.0648396	1.00579e-14	4.34267	1	2.15221e-05	0.593538
5031439G07Rik	1.12953e-16	0.281155	0.0647011	0.064848	1.74577e-15	4.3356	1	2.21691e-05	0.611358
B2_Rat1	7.56055e-17	0.280924	0.0647056	0.0648525	1.16845e-15	4.33174	1	2.25299e-05	0.621286
Cck	8.39024e-18	0.280867	0.0647068	0.0648537	1.29666e-16	4.33078	1	2.26211e-05	0.623776
Plk2	8.38696e-18	0.280757	0.0647089	0.0648558	1.29611e-16	4.32894	1	2.27954e-05	0.628562
Map7	-3.26938e-17	0.280561	0.0647128	0.0648597	-5.05214e-16	4.32565	1	2.31108e-05	0.637234
Kansl2	9.05216e-17	0.280246	0.064719	0.0648659	1.39869e-15	4.32039	1	2.3624e-05	0.651362
Mef2c	-4.86309e-16	-0.279395	0.0647357	0.0648827	-7.51222e-15	-4.30616	1	2.50682e-05	0.691154
Tmem181b-ps	6.65542e-16	0.279292	0.0647378	0.0648847	1.02806e-14	4.30444	1	2.52488e-05	0.696109
Vip	-9.04493e-17	-0.277827	0.0647664	0.0649134	-1.39655e-15	-4.27997	1	2.79503e-05	0.770562
Trpm2	6.79645e-17	0.275139	0.0648185	0.0649657	1.04853e-15	4.23515	1	3.36309e-05	0.927137
Egfr	6.64741e-17	-0.274752	0.064826	0.0649732	1.02542e-15	-4.2287	1	3.45341e-05	0.952
Dgkz	9.78109e-17	0.274259	0.0648355	0.0649827	1.5086e-15	4.2205	1	3.57168e-05	0.98457
Hpca	5.30003e-17	0.274206	0.0648365	0.0649837	8.17445e-16	4.21961	1	3.58467e-05	0.988113
Mrpl41	-2.16859e-17	0.274055	0.0648394	0.0649866	-3.34456e-16	4.21709	1	3.62185e-05	0.998326
Brap	-3.66614e-17	0.272745	0.0648645	0.0650118	-5.65199e-16	4.19531	1	3.95937e-05	1
Gm13928	-8.89467e-17	0.272472	0.0648697	0.065017	-1.37116e-15	4.19078	1	4.03332e-05	1
2010320O07Rik	-2.92356e-17	0.271325	0.0648916	0.0650389	-4.5053e-16	4.17174	1	4.3584e-05	1
Gm10721	6.86462e-16	-0.270418	0.0649088	0.0650561	1.05758e-14	-4.15669	1	4.63292e-05	1
Dda1	-1.41299e-16	0.269957	0.0649175	0.0650649	-2.17659e-15	4.14904	1	4.77878e-05	1
Thsd4	5.28659e-17	0.269707	0.0649222	0.0650696	8.14296e-16	4.1449	1	4.85947e-05	1
Slc39a6	5.07309e-16	-0.267626	0.0649614	0.0651088	7.80939e-15	-4.11043	1	5.58406e-05	1
Gm14286	-2.56169e-17	0.267463	0.0649644	0.0651119	-3.94322e-16	4.10775	1	5.64468e-05	1
St8sia6	-1.5258e-16	0.267318	0.0649671	0.0651146	-2.34857e-15	4.10535	1	5.69929e-05	1
Hpcal4	-1.44263e-17	0.267073	0.0649717	0.0651192	-2.2204e-16	4.1013	1	5.79269e-05	1
Fuk	-4.43063e-17	0.266828	0.0649763	0.0651238	-6.81884e-16	4.09724	1	5.88779e-05	1
Cacna1e	-7.41848e-17	0.266632	0.0649799	0.0651275	-1.14166e-15	4.09401	1	5.96458e-05	1
B2_Rat2	-8.16629e-17	0.266302	0.0649861	0.0651336	-1.25662e-15	4.08856	1	6.09624e-05	1
Far2os1	-6.67427e-17	0.265761	0.0649962	0.0651437	-1.02687e-15	4.07962	1	6.31814e-05	1
Skida1	-6.04458e-16	0.265504	0.0650009	0.0651485	-9.29923e-15	4.07537	1	6.42635e-05	1
Psd3	1.9463e-16	0.265311	0.0650045	0.0651521	2.9941e-15	4.07217	1	6.50881e-05	1
Rfng	-2.38525e-16	0.265269	0.0650053	0.0651529	-3.66932e-15	4.07149	1	6.52656e-05	1
Prkcb	-4.55104e-16	0.2652	0.0650066	0.0651541	-7.0009e-15	4.07035	1	6.55622e-05	1
Atp2b1	2.76766e-16	0.264856	0.0650129	0.0651605	4.25709e-15	4.06467	1	6.70637e-05	1
Bok	4.36251e-19	0.264604	0.0650176	0.0651652	6.70974e-18	4.0605	1	6.81869e-05	1
Gt(ROSA)26Sor	4.23501e-19	0.264177	0.0650255	0.0651731	6.51285e-18	4.05346	1	7.01244e-05	1
Ptpru	2.76741e-16	0.264026	0.0650283	0.0651759	4.2557e-15	4.05098	1	7.08206e-05	1
B1_Mus2	-2.53506e-16	0.263767	0.0650331	0.0651807	-3.89812e-15	4.04671	1	7.20332e-05	1
Itgb8	-1.90845e-16	-0.263602	0.0650361	0.0651838	-2.93444e-15	-4.04399	1	7.28141e-05	1
Fermt3	-9.10917e-17	0.263168	0.0650441	0.0651918	-1.40046e-15	4.03683	1	7.49115e-05	1
Gm22247	8.44002e-17	0.262833	0.0650503	0.0651979	1.29746e-15	4.03131	1	7.65695e-05	1
Panx2	7.87973e-17	0.262772	0.0650514	0.0651991	1.21131e-15	4.0303	1	7.68736e-05	1
Meg3	-3.44555e-16	0.262746	0.0650519	0.0651995	-5.29662e-15	4.02987	1	7.70045e-05	1
STRIDE1	5.93688e-17	-0.262605	0.0650545	0.0652021	9.12602e-16	-4.02755	1	7.77164e-05	1
Scpep1os	1.53047e-17	0.26233	0.0650595	0.0652072	2.35241e-16	4.02302	1	7.9122e-05	1
Zfp874b	-1.83095e-17	0.262083	0.065064	0.0652117	-2.81407e-16	4.01895	1	8.04043e-05	1
Zfp948	1.12382e-16	0.262028	0.065065	0.0652127	1.72722e-15	4.01806	1	8.06886e-05	1
Cbln2	7.12858e-16	-0.26178	0.0650696	0.0652173	1.09553e-14	-4.01397	1	8.20024e-05	1
Cflar	-3.69903e-17	0.261734	0.0650704	0.0652181	-5.68466e-16	4.0132	1	8.225e-05	1
Man2a1	-1.15414e-16	0.261457	0.0650755	0.0652232	-1.77355e-15	4.00864	1	8.37423e-05	1
Gm21847	-2.75984e-16	0.261324	0.0650779	0.0652256	-4.24083e-15	4.00647	1	8.44638e-05	1
Efr3a	-5.38073e-17	0.261279	0.0650787	0.0652265	-8.26803e-16	4.00572	1	8.47148e-05	1
Cit	5.29904e-16	-0.261252	0.0650792	0.0652269	8.14244e-15	-4.00527	1	8.48626e-05	1
Setd4	1.34749e-16	0.260775	0.0650879	0.0652357	2.07026e-15	3.99743	1	8.75243e-05	1
Galnt9	-8.93109e-17	0.26028	0.0650969	0.0652447	-1.37197e-15	3.98929	1	9.03693e-05	1
Zfp84	5.6302e-17	0.259733	0.0651068	0.0652546	8.64763e-16	3.9803	1	9.36168e-05	1
Gm26917	-1.1174e-16	0.259447	0.065112	0.0652598	-1.71612e-15	3.9756	1	9.53549e-05	1
P2rx7	-3.52121e-17	0.258762	0.0651244	0.0652723	-5.40689e-16	3.96434	1	9.96514e-05	1
AA465934	-2.28039e-16	-0.258713	0.0651253	0.0652731	-3.50155e-15	-3.96354	1	9.99646e-05	1
Cpne7	1.12282e-16	0.258683	0.0651258	0.0652737	1.72408e-15	3.96306	1	0.000100154	1
B1_Mur2	3.75947e-17	0.258498	0.0651292	0.065277	5.77233e-16	3.96002	1	0.000101351	1
C1ql2	-6.37323e-17	-0.258464	0.0651298	0.0652776	-9.78543e-16	-3.95946	1	0.000101573	1
Evc2	-8.93732e-17	0.258194	0.0651347	0.0652825	-1.37213e-15	3.95502	1	0.000103346	1
Rabggta	-6.69702e-17	0.258146	0.0651355	0.0652834	-1.02817e-15	3.95424	1	0.000103662	1
Slc2a13	-7.17173e-16	-0.25767	0.0651441	0.065292	-1.1009e-14	-3.94642	1	0.000106869	1
Arl15	2.37343e-16	0.257656	0.0651443	0.0652922	3.64334e-15	3.94619	1	0.000106967	1
Noa1	-6.69871e-17	0.257579	0.0651457	0.0652936	-1.02827e-15	3.94493	1	0.000107493	1
Arl9	2.63469e-16	0.257221	0.0651521	0.0653001	4.0439e-15	3.93907	1	0.000109975	1
Ppap2b	1.23436e-16	0.257074	0.0651548	0.0653027	1.89451e-15	3.93665	1	0.000111012	1
Teddm1b	6.55565e-17	0.257031	0.0651556	0.0653035	1.00615e-15	3.93594	1	0.00011132	1
Slc6a1	5.00159e-16	-0.256969	0.0651567	0.0653046	7.67625e-15	-3.93493	1	0.000111756	1
Ifi203	1.1611e-16	0.256955	0.0651569	0.0653048	1.78201e-15	3.93471	1	0.000111855	1
Gm16754	1.57038e-16	0.256913	0.0651577	0.0653056	2.41012e-15	3.934	1	0.000112161	1
Xist	1.02024e-16	-0.256583	0.0651636	0.0653115	1.56566e-15	-3.9286	1	0.000114541	1
Atp1b2	-8.98088e-17	-0.256386	0.0651671	0.065315	-1.37813e-15	-3.92538	1	0.000115981	1
Pcdh17	-7.86041e-17	-0.256304	0.0651686	0.0653165	-1.20617e-15	-3.92403	1	0.000116588	1
Igf1	2.05195e-16	-0.25602	0.0651737	0.0653216	3.14843e-15	-3.91937	1	0.000118714	1
Usp40	7.29859e-17	0.255733	0.0651788	0.0653267	1.11978e-15	3.91468	1	0.000120893	1
Rbfox2	-2.31347e-16	0.255581	0.0651815	0.0653295	-3.54927e-15	3.91218	1	0.000122068	1
Dock4	-1.86542e-16	0.255424	0.0651843	0.0653323	-2.86177e-15	3.90961	1	0.000123288	1
Pilra	4.55717e-16	0.255303	0.0651864	0.0653344	6.99097e-15	3.90763	1	0.000124235	1
Ssbp4	3.51154e-16	0.255031	0.0651913	0.0653393	5.38652e-15	3.90319	1	0.000126388	1
Sema6a	-8.22925e-17	-0.254774	0.0651958	0.0653439	-1.26223e-15	-3.89897	1	0.000128462	1
Ddx55	7.48143e-17	0.25444	0.0652018	0.0653498	1.14743e-15	3.89351	1	0.000131195	1
Fhl2	-9.69539e-17	0.254427	0.065202	0.06535	-1.48698e-15	3.89329	1	0.000131306	1
Gm17251	1.64428e-16	0.25429	0.0652044	0.0653524	2.52173e-15	3.89106	1	0.000132441	1
Vstm2a	-4.70621e-16	-0.254223	0.0652056	0.0653536	-7.21749e-15	-3.88996	1	0.000133001	1
Slc52a2	6.73303e-17	0.25391	0.0652112	0.0653592	1.0325e-15	3.88484	1	0.00013565	1
Sh3rf1	2.24146e-16	0.253364	0.0652208	0.0653689	3.43672e-15	3.8759	1	0.000140395	1
Gnat1	-1.7914e-16	0.253203	0.0652237	0.0653717	-2.74656e-15	3.87328	1	0.000141814	1
Gad2	2.23956e-16	-0.252968	0.0652278	0.0653759	3.43345e-15	-3.86944	1	0.000143925	1
Chka	-4.47378e-17	0.252384	0.0652381	0.0653862	-6.85762e-16	3.85991	1	0.000149281	1
Dock10	-3.73982e-17	-0.251922	0.0652462	0.0653943	-5.73187e-16	-3.85235	1	0.000153662	1
Lypla2	7.09516e-16	0.25134	0.0652564	0.0654045	1.08727e-14	3.84286	1	0.000159335	1
Nars2	4.4846e-17	0.251238	0.0652582	0.0654063	6.87209e-16	3.84119	1	0.000160356	1
Tfb1m	1.19526e-16	0.251192	0.065259	0.0654071	1.83157e-15	3.84043	1	0.000160817	1
Top3b	-7.45552e-18	0.250423	0.0652724	0.0654206	-1.14222e-16	3.8279	1	0.000168685	1
Gm4660	3.73533e-17	0.250418	0.0652725	0.0654207	5.72267e-16	3.82781	1	0.000168743	1
Magi1	-2.46454e-16	-0.250148	0.0652772	0.0654254	-3.7755e-15	-3.8234	1	0.000171595	1
Adcyap1r1	2.1658e-16	-0.249881	0.0652819	0.0654301	3.31762e-15	-3.81905	1	0.000174455	1
Gm25472	-2.9898e-17	0.249152	0.0652945	0.0654428	-4.57895e-16	3.80717	1	0.000182499	1
Map4k5	-2.61422e-16	0.248781	0.065301	0.0654492	-4.00335e-15	3.80113	1	0.00018672	1
Shank1	4.47676e-17	0.248614	0.0653038	0.0654521	6.85528e-16	3.79842	1	0.000188649	1
Akr1c20	-4.2574e-16	0.248184	0.0653113	0.0654596	-6.51863e-15	3.7914	1	0.000193716	1
Grpr	5.45232e-16	-0.248139	0.0653121	0.0654603	8.3481e-15	-3.79068	1	0.000194247	1
Mfap5	-3.95872e-16	0.248012	0.0653143	0.0654625	-6.06104e-15	3.78861	1	0.000195769	1
Pacsin2	-5.96777e-17	-0.247735	0.065319	0.0654673	-9.13634e-16	-3.7841	1	0.000199129	1
Ascc2	9.70063e-17	0.247325	0.0653261	0.0654744	1.48495e-15	3.77743	1	0.000204201	1
Dpyd	-7.47755e-17	0.24686	0.0653341	0.0654824	-1.14451e-15	3.76986	1	0.000210102	1
BC046401	8.57856e-17	0.246709	0.0653367	0.065485	1.31298e-15	3.76742	1	0.000212042	1
Gm26237	1.39923e-16	0.246484	0.0653405	0.0654889	2.14144e-15	3.76375	1	0.000214981	1
Sik3	2.22986e-17	0.246455	0.065341	0.0654894	3.41265e-16	3.76328	1	0.000215361	1
Slc8a1	-2.76433e-16	0.246277	0.0653441	0.0654924	-4.23043e-15	3.7604	1	0.000217708	1
Gm26254	-7.58815e-18	0.245984	0.0653491	0.0654975	-1.16117e-16	3.75562	1	0.000221646	1
Negr1	-2.61262e-16	-0.245869	0.0653511	0.0654994	-3.99783e-15	-3.75375	1	0.000223201	1
Fam60a	-1.12148e-16	0.245789	0.0653525	0.0655008	-1.71605e-15	3.75245	1	0.000224294	1
Wwc1	6.3342e-17	0.245398	0.0653591	0.0655075	9.69137e-16	3.74611	1	0.000229685	1
Vmac	3.05434e-15	0.245347	0.06536	0.0655084	4.67311e-14	3.74528	1	0.000230396	1
Iqsec1	4.46698e-17	0.245341	0.0653601	0.0655085	6.83442e-16	3.74518	1	0.000230483	1
Akap13	9.69399e-17	0.245102	0.0653642	0.0655126	1.48307e-15	3.7413	1	0.000233853	1
Ankfy1	-2.62937e-17	0.244808	0.0653692	0.0655176	-4.02234e-16	3.73653	1	0.000238064	1
Ankrd11	4.19689e-17	0.24477	0.0653698	0.0655182	6.42023e-16	3.73591	1	0.000238608	1
Nhej1	-3.41827e-16	0.244685	0.0653713	0.0655197	-5.22902e-15	3.73453	1	0.000239848	1
Rnf112	-7.64459e-18	0.244094	0.0653813	0.0655297	-1.16923e-16	3.72494	1	0.000248583	1
Sema4g	8.97966e-17	-0.244023	0.0653825	0.0655309	1.3734e-15	-3.72378	1	0.000249657	1
Acp6	1.11827e-16	0.243448	0.0653923	0.0655407	1.71009e-15	3.71446	1	0.000258472	1
Rbms3	-3.7321e-16	-0.243358	0.0653938	0.0655422	-5.70712e-15	-3.713	1	0.000259876	1
Rcn3	3.00394e-16	0.243297	0.0653948	0.0655433	4.59354e-15	3.71201	1	0.00026083	1
Ryr3	2.83582e-16	0.243028	0.0653994	0.0655478	4.33616e-15	3.70764	1	0.000265104	1
4933427D14Rik	-5.24941e-17	0.242737	0.0654043	0.0655527	-8.0261e-16	3.70293	1	0.000269777	1
Arpp21	7.15397e-19	0.242698	0.0654049	0.0655534	1.0938e-17	3.7023	1	0.00027041	1
C730034F03Rik	-2.50408e-16	0.24248	0.0654086	0.0655571	-3.82837e-15	3.69877	1	0.000273973	1
Spock3	-1.4167e-16	-0.242466	0.0654088	0.0655573	-2.16592e-15	-3.69854	1	0.000274202	1
4930432L08Rik	-2.95223e-16	0.242304	0.0654116	0.0655601	-4.51331e-15	3.69592	1	0.000276882	1
Arhgef38	-7.49162e-17	0.24215	0.0654142	0.0655627	-1.14526e-15	3.69342	1	0.000279456	1
Gm13402	2.89157e-16	0.242144	0.0654143	0.0655628	4.42039e-15	3.69332	1	0.000279554	1
Nkain3	8.93825e-17	0.242117	0.0654147	0.0655632	1.3664e-15	3.69288	1	0.000280007	1
Kit	1.78995e-16	0.241925	0.065418	0.0655665	2.73617e-15	3.68976	1	0.000283258	1
Ppp2r2b	2.01393e-16	0.241712	0.0654215	0.06557	3.07839e-15	3.68631	1	0.000286895	1
Gm5147	-1.8696e-16	0.241423	0.0654264	0.0655749	-2.85757e-15	3.68163	1	0.000291902	1
Sepw1	2.76065e-16	0.241405	0.0654267	0.0655752	4.21946e-15	3.68134	1	0.000292213	1
Rela	1.0938e-17	0.241155	0.0654309	0.0655794	1.67169e-16	3.67729	1	0.000296617	1
Chst8	-2.39253e-16	0.240906	0.065435	0.0655836	-3.65634e-15	3.67327	1	0.000301044	1
Cpt1c	3.7068e-17	0.240866	0.0654357	0.0655843	5.66479e-16	3.67261	1	0.00030178	1
Gm25374	4.45287e-17	0.240617	0.0654399	0.0655884	6.80453e-16	3.6686	1	0.000306276	1
Cpe	2.31233e-16	0.240616	0.0654399	0.0655884	3.53352e-15	3.66857	1	0.000306305	1
Etv1	2.76033e-16	0.240318	0.0654449	0.0655934	4.21779e-15	3.66375	1	0.000311792	1
Erdr1	1.71466e-16	0.239899	0.0654519	0.0656004	2.61973e-15	3.65697	1	0.000319664	1
Gabra1	8.61948e-17	-0.239594	0.0654569	0.0656055	1.31682e-15	-3.65205	1	0.000325491	1
Uncx	1.19172e-16	0.239337	0.0654612	0.0656098	1.8205e-15	3.64789	1	0.000330493	1
Gm16287	5.89662e-16	0.23919	0.0654636	0.0656123	9.00748e-15	3.64551	1	0.00033339	1
Gm12903	8.92904e-17	0.239032	0.0654663	0.0656149	1.36391e-15	3.64296	1	0.000336518	1
Haghl	1.26626e-16	0.238851	0.0654693	0.0656179	1.93413e-15	3.64003	1	0.000340147	1
Trpv2	1.26625e-16	0.238832	0.0654696	0.0656182	1.93411e-15	3.63973	1	0.000340522	1
Mllt3	-2.76656e-16	0.238822	0.0654698	0.0656184	-4.22571e-15	3.63955	1	0.000340738	1
Rasgrp1	-2.31857e-16	0.238502	0.0654751	0.0656237	-3.54115e-15	3.63438	1	0.000347247	1
Mars	3.88632e-17	0.238461	0.0654757	0.0656244	5.93551e-16	3.63372	1	0.000348083	1
Gm25603	8.1803e-17	0.238389	0.0654769	0.0656256	1.24934e-15	3.63256	1	0.00034957	1
2810474O19Rik	1.86356e-16	0.238332	0.0654779	0.0656265	2.84609e-15	3.63164	1	0.000350747	1
Furin	1.56482e-16	0.238314	0.0654782	0.0656268	2.38984e-15	3.63135	1	0.000351111	1
Pdgfb	-1.23574e-16	0.238295	0.0654785	0.0656271	-1.88725e-15	3.63104	1	0.000351515	1
Gm23474	-9.74372e-17	0.238251	0.0654792	0.0656279	-1.48806e-15	3.63034	1	0.000352418	1
Lin52	-4.08657e-18	0.2382	0.06548	0.0656287	-6.24094e-17	3.62952	1	0.000353476	1
Gm13563	-5.13754e-18	0.238175	0.0654805	0.0656291	-7.84591e-17	3.62911	1	0.000354006	1
Gm21917	2.20402e-17	0.237805	0.0654866	0.0656352	3.36561e-16	3.62313	1	0.000361807	1
Adora1	-4.09881e-18	0.237791	0.0654868	0.0656355	-6.25898e-17	3.6229	1	0.000362117	1
Dpf3	-9.74553e-17	0.237645	0.0654892	0.0656379	-1.48811e-15	3.62055	1	0.000365234	1
Chst3	2.05004e-16	0.237586	0.0654902	0.0656389	3.1303e-15	3.61959	1	0.000366508	1
Gm27512	-1.7214e-16	0.237533	0.0654911	0.0656397	-2.62845e-15	3.61874	1	0.000367654	1
Prkab2	3.73033e-16	0.237426	0.0654928	0.0656415	5.69578e-15	3.617	1	0.000369984	1
Asun	-6.01252e-17	0.237286	0.0654951	0.0656438	-9.18009e-16	3.61475	1	0.000373038	1
Zfp385b	1.93789e-16	0.237164	0.0654971	0.0656458	2.95874e-15	3.61278	1	0.00037571	1
Col15a1	2.31126e-16	0.237053	0.065499	0.0656477	3.5287e-15	3.61099	1	0.000378173	1
Anks3	-1.87091e-16	0.237051	0.065499	0.0656477	-2.8564e-15	3.61096	1	0.000378209	1
Acap2	-1.04962e-16	0.236365	0.0655103	0.065659	-1.60222e-15	3.59988	1	0.000393747	1
Mir3473f	2.19889e-17	0.236089	0.0655148	0.0656635	3.35633e-16	3.59544	1	0.000400148	1
Gm5087	3.62623e-16	-0.236047	0.0655155	0.0656642	5.53492e-15	-3.59475	1	0.000401141	1
Miat	-1.49787e-16	0.235833	0.065519	0.0656677	-2.28616e-15	3.59131	1	0.000406183	1
Gm15409	1.82443e-17	0.235736	0.0655206	0.0656693	2.78452e-16	3.58975	1	0.000408477	1
Atg5	-4.15095e-17	0.235453	0.0655252	0.065674	-6.33489e-16	3.58518	1	0.000415293	1
Ipo13	-8.25875e-17	0.235351	0.0655269	0.0656756	-1.26036e-15	3.58353	1	0.000417771	1
Gm13075	-1.7221e-16	0.235186	0.0655296	0.0656783	-2.62798e-15	3.58088	1	0.000421798	1
Adamts9	-4.15194e-17	0.235121	0.0655306	0.0656794	-6.33588e-16	3.57983	1	0.000423398	1
Col4a1	-9.19036e-16	0.234903	0.0655342	0.0656829	-1.40238e-14	3.57632	1	0.000428803	1
Zdhhc23	-1.33727e-15	0.234416	0.0655421	0.0656909	-2.04032e-14	3.56847	1	0.000441123	1
Josd2	1.04088e-16	0.234399	0.0655424	0.0656912	1.58811e-15	3.56819	1	0.000441562	1
1190005I06Rik	-1.13431e-16	0.234108	0.0655471	0.0656959	-1.73052e-15	3.56351	1	0.000449085	1
Fam163b	5.2752e-17	-0.234104	0.0655472	0.065696	8.04795e-16	-3.56345	1	0.000449179	1
Ptprn	1.33948e-16	0.233974	0.0655493	0.0656981	2.04347e-15	3.56135	1	0.000452589	1
Smox	2.90773e-16	0.233741	0.0655531	0.0657019	4.43569e-15	3.5576	1	0.000458732	1
Epha6	-6.65153e-16	0.233734	0.0655532	0.065702	-1.01468e-14	3.55749	1	0.000458915	1
Agap2	8.91224e-17	0.233407	0.0655585	0.0657073	1.35943e-15	3.55223	1	0.000467667	1
Vwc2	3.58971e-16	-0.233303	0.0655601	0.065709	5.47544e-15	-3.55055	1	0.000470503	1
Ddx27	-5.27963e-17	0.232623	0.0655711	0.06572	-8.05176e-16	3.53961	1	0.000489318	1
Zscan26	9.65623e-17	0.232464	0.0655737	0.0657226	1.47258e-15	3.53705	1	0.000493835	1
Klk9	-1.20017e-16	0.232393	0.0655748	0.0657237	-1.83022e-15	3.5359	1	0.000495869	1
Gm15338	-5.28088e-17	0.232204	0.0655779	0.0657268	-8.05284e-16	3.53287	1	0.000501274	1
Msi2	8.64178e-17	-0.232129	0.0655791	0.065728	1.31776e-15	-3.53166	1	0.000503451	1
Nufip2	-6.77507e-17	0.232017	0.0655809	0.0657298	-1.03309e-15	3.52985	1	0.000506709	1
3110039M20Rik	5.17377e-17	0.231941	0.0655821	0.065731	7.889e-16	3.52864	1	0.000508919	1
Cldn12	-3.80335e-16	-0.23186	0.0655834	0.0657323	-5.79925e-15	-3.52734	1	0.000511276	1
Myl12a	-1.37617e-16	-0.231783	0.0655846	0.0657335	-2.09831e-15	-3.5261	1	0.000513553	1
Prdx6	1.04008e-16	0.231709	0.0655858	0.0657347	1.58583e-15	3.52491	1	0.000515741	1
Inf2	-1.64846e-16	0.231699	0.065586	0.0657349	-2.51344e-15	3.52475	1	0.000516026	1
Gm15879	-7.89648e-17	0.231621	0.0655872	0.0657361	-1.20397e-15	3.5235	1	0.000518344	1
Mkx	-1.18928e-16	-0.231161	0.0655946	0.0657435	-1.81307e-15	-3.51611	1	0.000532186	1
Arhgef17	-4.11312e-16	0.231149	0.0655948	0.0657437	-6.2705e-15	3.51591	1	0.00053256	1
Nf2	6.89888e-18	0.230943	0.0655981	0.065747	1.05169e-16	3.5126	1	0.00053889	1
Actn2	-1.57403e-16	0.230884	0.0655991	0.065748	-2.39946e-15	3.51164	1	0.000540718	1
St6galnac5	-5.723e-19	0.230842	0.0655997	0.0657487	-8.72412e-18	3.51098	1	0.000542004	1
Mettl6	-2.54491e-16	0.230796	0.0656005	0.0657494	-3.87941e-15	3.51024	1	0.000543435	1
Gpr137b-ps	-6.77935e-17	0.230586	0.0656038	0.0657528	-1.03338e-15	3.50686	1	0.000550005	1
Pigv	-1.1261e-16	0.230334	0.0656079	0.0657568	-1.71641e-15	3.50281	1	0.000557976	1
Scn1b	-7.52823e-17	0.229895	0.0656149	0.0657638	-1.14734e-15	3.49576	1	0.000572115	1
Gm6994	1.03951e-16	0.229817	0.0656161	0.0657651	1.58424e-15	3.49451	1	0.000574662	1
Tyr	-5.28863e-17	0.22961	0.0656194	0.0657683	-8.05955e-16	3.4912	1	0.000581456	1
Gm22566	6.94043e-17	0.229586	0.0656198	0.0657687	1.05767e-15	3.49081	1	0.000582252	1
Svil	3.18009e-16	-0.229507	0.065621	0.06577	4.84615e-15	-3.48953	1	0.000584889	1
Lmo4	-1.27574e-16	0.229393	0.0656228	0.0657718	-1.94406e-15	3.48771	1	0.000588676	1
Gprin3	-1.31309e-16	0.229387	0.0656229	0.0657719	-2.00096e-15	3.48762	1	0.000588871	1
Prorsd1	-2.62003e-16	0.229337	0.0656237	0.0657727	-3.99251e-15	3.48681	1	0.000590555	1
Ly6e	6.84621e-18	0.22918	0.0656262	0.0657752	1.04321e-16	3.48429	1	0.000595858	1
Gm15280	1.03929e-16	0.229064	0.0656281	0.065777	1.58361e-15	3.48243	1	0.00059978	1
4930419G24Rik	-1.79875e-16	0.228604	0.0656353	0.0657844	-2.74052e-15	3.47505	1	0.00061563	1
Rnf207	1.0391e-16	0.228445	0.0656379	0.0657869	1.58309e-15	3.4725	1	0.000621196	1
Mat2a	-2.30487e-17	0.228435	0.065638	0.065787	-3.51149e-16	3.47234	1	0.000621548	1
Gm12757	1.56182e-16	0.228245	0.065641	0.06579	2.37933e-15	3.46929	1	0.000628283	1
Ppfia2	-3.79963e-17	0.228058	0.065644	0.065793	-5.78824e-16	3.46629	1	0.000634959	1
Arc	4.41519e-17	0.228004	0.0656448	0.0657939	6.72588e-16	3.46542	1	0.000636902	1
Ctnnb1	9.77451e-17	-0.227943	0.0656458	0.0657948	1.48898e-15	-3.46444	1	0.0006391	1
Zfhx2	1.41236e-16	0.227935	0.0656459	0.0657949	2.15148e-15	3.46433	1	0.000639356	1
Ppm1e	1.63637e-16	0.227819	0.0656478	0.0657968	2.49265e-15	3.46246	1	0.000643573	1
Msra	-4.56224e-16	0.227714	0.0656494	0.0657984	-6.9494e-15	3.46078	1	0.000647401	1
Flot1	-1.0002e-17	0.227679	0.06565	0.065799	-1.52353e-16	3.46022	1	0.000648671	1
Tpcn1	1.48696e-16	0.227668	0.0656501	0.0657992	2.26498e-15	3.46004	1	0.000649084	1
Tubgcp2	-2.5324e-16	-0.227303	0.0656559	0.0658049	-3.85708e-15	-3.4542	1	0.000662562	1
Zfp952	5.25299e-17	0.227211	0.0656573	0.0658064	8.00062e-16	3.45272	1	0.000666016	1
Wdhd1	-2.08338e-18	0.227133	0.0656586	0.0658076	-3.17305e-17	3.45147	1	0.00066895	1
Rap1b	-4.42424e-18	0.226897	0.0656623	0.0658113	-6.73787e-17	3.44768	1	0.000677899	1
Khdrbs2	3.66461e-17	0.226742	0.0656647	0.0658138	5.58079e-16	3.44521	1	0.000683804	1
Lgals12	-3.9651e-16	0.226663	0.0656659	0.065815	-6.03829e-15	3.44394	1	0.000686866	1
9130230L23Rik	6.46489e-17	0.226647	0.0656662	0.0658153	9.84507e-16	3.44368	1	0.000687484	1
Pxn	1.0759e-16	0.226603	0.0656669	0.065816	1.63841e-15	3.44298	1	0.000689189	1
Rab15	-3.80399e-17	0.226599	0.0656669	0.065816	-5.79285e-16	3.44292	1	0.000689316	1
9330151L19Rik	1.71059e-16	0.226271	0.0656721	0.0658212	2.60474e-15	3.43766	1	0.000702139	1
Stat2	-6.79248e-17	0.226189	0.0656734	0.0658225	-1.03428e-15	3.43636	1	0.00070536	1
Hdac1	4.10036e-16	0.226107	0.0656747	0.0658237	6.24344e-15	3.43504	1	0.000708625	1
Iyd	-3.92794e-16	0.226062	0.0656754	0.0658244	-5.98084e-15	3.43432	1	0.000710397	1
Focad	3.66151e-17	0.225705	0.0656809	0.06583	5.57469e-16	3.42861	1	0.000724735	1
Sap25	-2.7705e-16	0.225635	0.065682	0.0658311	-4.21805e-15	3.42748	1	0.000727588	1
Tmem180	9.26235e-17	0.225609	0.0656824	0.0658315	1.41017e-15	3.42707	1	0.000728651	1
Gm24369	-3.80756e-17	0.225403	0.0656856	0.0658348	-5.79664e-16	3.42377	1	0.000737076	1
Themis2	1.63561e-16	0.22527	0.0656877	0.0658368	2.48998e-15	3.42165	1	0.000742571	1
Slit3	2.16656e-17	0.225264	0.0656878	0.0658369	3.29826e-16	3.42155	1	0.000742826	1
Gm15541	-2.0985e-16	0.225172	0.0656893	0.0658384	-3.19459e-15	3.42007	1	0.000746669	1
Vmn2r40	6.72531e-18	0.225132	0.0656899	0.065839	1.0238e-16	3.41944	1	0.000748314	1
Lrp4	-8.2898e-17	0.224955	0.0656926	0.0658418	-1.26191e-15	3.4166	1	0.000755745	1
Tbc1d1	-3.14414e-16	0.224864	0.065694	0.0658432	-4.78603e-15	3.41515	1	0.000759587	1
3110035E14Rik	-8.89464e-16	0.224812	0.0656949	0.065844	-1.35393e-14	3.41432	1	0.000761787	1
Gtf2h1	7.39229e-17	0.2246	0.0656982	0.0658473	1.12519e-15	3.41092	1	0.000770851	1
Mir7052	9.25877e-17	0.22441	0.0657011	0.0658503	1.40923e-15	3.40788	1	0.000779048	1
Cd38	2.91072e-17	0.224376	0.0657016	0.0658508	4.43021e-16	3.40734	1	0.000780517	1
2900005J15Rik	-1.1653e-16	0.224111	0.0657058	0.0658549	-1.77351e-15	3.4031	1	0.00079212	1
B230312C02Rik	-2.17351e-16	0.224085	0.0657061	0.0658553	-3.30793e-15	3.40269	1	0.00079325	1
Gm15124	1.26184e-16	0.224049	0.0657067	0.0658559	1.92041e-15	3.40212	1	0.000794814	1
Celf2	2.75539e-16	0.223798	0.0657106	0.0658598	4.19323e-15	3.3981	1	0.000805994	1
Flnb	5.14939e-17	0.223779	0.0657109	0.0658601	7.83643e-16	3.39779	1	0.000806843	1
Gm12976	1.48576e-16	0.223655	0.0657128	0.065862	2.261e-15	3.39581	1	0.000812398	1
Parvb	3.24076e-16	0.223586	0.0657139	0.0658631	4.93163e-15	3.39472	1	0.000815501	1
Gm16074	8.41559e-17	0.223402	0.0657167	0.0658659	1.28059e-15	3.39177	1	0.000823862	1
Trav14-3	-9.19381e-16	0.223342	0.0657176	0.0658668	-1.39899e-14	3.39082	1	0.000826592	1
Car7	9.25551e-17	0.22332	0.065718	0.0658672	1.40837e-15	3.39045	1	0.000827636	1
BC1_Ma	4.56128e-17	-0.223092	0.0657215	0.0658707	6.94032e-16	-3.38681	1	0.000838141	1
Hivep2	6.63955e-17	0.222616	0.0657288	0.0658781	1.01014e-15	3.37921	1	0.000860461	1
B3gat2	9.62624e-17	0.222424	0.0657318	0.065881	1.46447e-15	3.37614	1	0.000869633	1
Gm28792	5.89178e-17	0.222296	0.0657338	0.065883	8.96309e-16	3.37411	1	0.000875775	1
Spg7	-3.8173e-17	0.222144	0.0657361	0.0658853	-5.807e-16	3.37167	1	0.000883155	1
Arl5b	3.05361e-16	0.222099	0.0657368	0.065886	4.64521e-15	3.37095	1	0.000885361	1
Ttr	-1.70933e-16	-0.222068	0.0657373	0.0658865	-2.60025e-15	-3.37046	1	0.000886848	1
1700007F19Rik	-9.79165e-16	0.222048	0.0657376	0.0658868	-1.48951e-14	3.37014	1	0.000887827	1
Proscos	-1.46467e-16	0.221972	0.0657387	0.065888	-2.22801e-15	3.36893	1	0.000891556	1
BC1_Mm	-1.29854e-16	-0.221929	0.0657394	0.0658886	-1.97529e-15	-3.36825	1	0.000893655	1
Dancr	1.70928e-16	0.221884	0.0657401	0.0658893	2.60006e-15	3.36753	1	0.00089587	1
Gm8444	1.55991e-16	0.221863	0.0657404	0.0658897	2.37283e-15	3.3672	1	0.000896899	1
Il34	-1.91285e-16	0.221657	0.0657436	0.0658928	-2.90956e-15	3.3639	1	0.000907142	1
Actr2	-4.56698e-17	0.221185	0.0657508	0.0659001	-6.94589e-16	3.35637	1	0.000930952	1
Sst	1.70904e-16	0.221082	0.0657524	0.0659016	2.59921e-15	3.35473	1	0.000936219	1
Ptk2b	-1.2036e-16	0.220884	0.0657554	0.0659047	-1.83043e-15	3.35157	1	0.000946419	1
Ttc9c	-4.56835e-17	0.220726	0.0657578	0.0659071	-6.94724e-16	3.34904	1	0.000954667	1
Gpm6b	2.15702e-16	0.220715	0.065758	0.0659073	3.28024e-15	3.34888	1	0.00095521	1
Cx3cr1	-6.99574e-17	0.220648	0.065759	0.0659083	-1.06384e-15	3.3478	1	0.000958739	1
Mpdu1	-1.81244e-18	0.220578	0.0657601	0.0659094	-2.75614e-17	3.34669	1	0.000962424	1
Wdr60	-1.20371e-16	0.220546	0.0657606	0.0659098	-1.83044e-15	3.34617	1	0.000964128	1
Arhgef40	-5.31682e-17	0.220174	0.0657662	0.0659155	-8.08442e-16	3.34025	1	0.000983887	1
Mettl7a2	-1.20383e-16	0.220137	0.0657668	0.0659161	-1.83045e-15	3.33966	1	0.000985886	1
Limch1	-1.03662e-16	-0.220126	0.065767	0.0659163	-1.5762e-15	-3.33947	1	0.000986513	1
Cxcl12	-2.00746e-16	-0.220071	0.0657678	0.0659171	-3.05235e-15	-3.3386	1	0.000989467	1
H2-Q7	2.08214e-16	0.220062	0.0657679	0.0659172	3.1659e-15	3.33846	1	0.000989935	1
Fcho1	-6.81131e-17	0.219886	0.0657706	0.0659199	-1.03562e-15	3.33565	1	0.000999514	1
Ctnnd2	3.79972e-16	0.219732	0.0657729	0.0659223	5.77703e-15	3.3332	1	0.0010079	1
Wfs1	-1.69618e-15	0.219536	0.0657759	0.0659252	-2.57873e-14	3.33007	1	0.00101876	1
Golm1	2.15665e-16	0.219481	0.0657767	0.0659261	3.27875e-15	3.3292	1	0.00102179	1
Rbm45	1.0364e-16	0.219392	0.0657781	0.0659274	1.5756e-15	3.32779	1	0.00102673	1
1110002J07Rik	-8.38479e-18	0.219316	0.0657793	0.0659286	-1.27469e-16	3.32656	1	0.00103103	1
Lincpint	-9.80063e-17	0.2192	0.065781	0.0659303	-1.48989e-15	3.32472	1	0.00103753	1
Lrrc69	-1.8016e-16	0.219078	0.0657829	0.0659322	-2.7387e-15	3.32277	1	0.00104445	1
Ifi27	-1.65236e-16	0.218661	0.0657892	0.0659385	-2.5116e-15	3.31614	1	0.00106832	1
ID_Rn2	-8.58811e-17	-0.218655	0.0657893	0.0659386	-1.3054e-15	-3.31604	1	0.00106871	1
Wdr70	-1.391e-16	0.218566	0.0657906	0.06594	-2.11429e-15	3.31462	1	0.00107387	1
Sstr4	4.09808e-16	0.218482	0.0657919	0.0659412	6.22885e-15	3.31328	1	0.0010788	1
Prickle2	-1.58795e-17	0.218429	0.0657927	0.065942	-2.41356e-16	3.31243	1	0.00108189	1
Ewsr1	-1.31638e-16	0.218376	0.0657935	0.0659428	-2.00077e-15	3.3116	1	0.00108495	1
Ccbe1	-1.26537e-16	0.218222	0.0657958	0.0659452	-1.92318e-15	3.30915	1	0.00109406	1
D630003M21Rik	2.60435e-16	0.21817	0.0657966	0.0659459	3.95819e-15	3.30831	1	0.00109716	1
Tmem136	9.05298e-17	0.218022	0.0657988	0.0659482	1.37586e-15	3.30597	1	0.00110595	1
Brpf1	-1.72725e-16	0.217976	0.0657995	0.0659489	-2.62501e-15	3.30523	1	0.00110872	1
Pecam1	2.15619e-16	0.21793	0.0658002	0.0659496	3.27687e-15	3.3045	1	0.00111148	1
Zfp536	-6.50904e-18	-0.217893	0.0658007	0.0659501	-9.89205e-17	-3.3039	1	0.00111372	1
Dgkb	-1.57791e-16	0.217867	0.0658011	0.0659505	-2.398e-15	3.30349	1	0.00111531	1
Olfr568	-1.61526e-16	0.217849	0.0658014	0.0659508	-2.45475e-15	3.30321	1	0.00111636	1
Cntnap5c	3.2644e-17	0.217771	0.0658026	0.065952	4.9609e-16	3.30197	1	0.00112106	1
Gm22994	1.03589e-16	0.217699	0.0658037	0.065953	1.57422e-15	3.30082	1	0.00112544	1
Taco1	9.98468e-17	0.217412	0.065808	0.0659574	1.51724e-15	3.29624	1	0.00114305	1
Vps72	4.54577e-16	0.217143	0.065812	0.0659614	6.9072e-15	3.29196	1	0.00115975	1
Gpr107	6.4806e-18	0.216941	0.065815	0.0659645	9.84668e-17	3.28875	1	0.00117242	1
Parp8	4.69506e-16	0.216902	0.0658156	0.065965	7.13365e-15	3.28813	1	0.00117489	1
9430020K01Rik	-1.39151e-16	0.216864	0.0658162	0.0659656	-2.11424e-15	3.28754	1	0.00117726	1
Man1a	-7.55275e-16	0.216843	0.0658165	0.0659659	-1.14755e-14	3.28719	1	0.00117863	1
Gm12668	1.85714e-16	0.216838	0.0658166	0.065966	2.82168e-15	3.28712	1	0.00117892	1
2900079G21Rik	3.9482e-16	0.216769	0.0658176	0.065967	5.9987e-15	3.28602	1	0.0011833	1
Cldn22	-1.39157e-16	0.216676	0.065819	0.0659684	-2.11423e-15	3.28453	1	0.00118927	1
Rae1	-1.08022e-17	0.216516	0.0658214	0.0659708	-1.64114e-16	3.282	1	0.00119951	1
Gm23506	-5.98152e-17	0.216413	0.0658229	0.0659724	-9.08728e-16	3.28036	1	0.00120618	1
Gm27177	5.50072e-17	0.216388	0.0658233	0.0659727	8.35679e-16	3.27996	1	0.0012078	1
Uqcr10	1.25951e-16	0.216256	0.0658253	0.0659747	1.91341e-15	3.27787	1	0.00121636	1
Gatm	8.86059e-17	0.21612	0.0658273	0.0659767	1.34604e-15	3.2757	1	0.00122526	1
Gm22411	2.90245e-16	0.216061	0.0658282	0.0659776	4.40912e-15	3.27476	1	0.00122919	1
Crym	-2.43738e-16	0.215759	0.0658327	0.0659822	-3.70239e-15	3.26995	1	0.00124924	1
Slc25a42	2.51134e-17	0.215682	0.0658338	0.0659833	3.81467e-16	3.26874	1	0.00125438	1
Usp4	-6.82445e-17	0.215487	0.0658367	0.0659862	-1.03657e-15	3.26564	1	0.00126754	1
Cpne6	-2.34356e-17	0.215484	0.0658368	0.0659862	-3.55965e-16	3.2656	1	0.00126772	1
Grin2a	1.38996e-16	0.215444	0.0658374	0.0659869	2.1112e-15	3.26495	1	0.00127049	1
Lats2	1.44594e-16	0.215344	0.0658389	0.0659883	2.19618e-15	3.26336	1	0.00127729	1
Cmtr1	-2.77359e-16	0.215299	0.0658395	0.065989	-4.21265e-15	3.26265	1	0.00128033	1
Myoz2	9.60422e-17	0.215052	0.0658432	0.0659927	1.45865e-15	3.25872	1	0.00129737	1
1700044K03Rik	4.13436e-16	0.214951	0.0658447	0.0659942	6.27896e-15	3.25711	1	0.00130439	1
Cfhr1	5.12264e-17	0.214826	0.0658466	0.065996	7.77967e-16	3.25513	1	0.00131308	1
Onecut2	-1.97247e-17	0.214708	0.0658483	0.0659978	-2.99547e-16	3.25325	1	0.0013214	1
Mapk10	1.85649e-16	0.214693	0.0658485	0.065998	2.81934e-15	3.25302	1	0.00132245	1
Adam15	1.63243e-16	0.214642	0.0658493	0.0659988	2.47905e-15	3.25222	1	0.00132601	1
Arl5c	1.55772e-16	0.214547	0.0658507	0.0660002	2.36554e-15	3.25071	1	0.00133273	1
Fam20b	-2.3468e-17	0.2144	0.0658529	0.0660024	-3.5637e-16	3.24836	1	0.00134324	1
Olfr324	-1.32015e-17	0.214323	0.065854	0.0660035	-2.00467e-16	3.24714	1	0.00134876	1
Ncor2	-1.28026e-16	0.214268	0.0658548	0.0660043	-1.94407e-15	3.24627	1	0.00135269	1
Phf7	1.33356e-16	0.214158	0.0658565	0.066006	2.02495e-15	3.24453	1	0.00136061	1
Abcc10	2.66329e-18	0.214155	0.0658565	0.066006	4.04409e-17	3.24447	1	0.00136086	1
Fgfr1	2.08036e-16	0.214086	0.0658575	0.066007	3.15888e-15	3.24338	1	0.00136584	1
Gm13582	-2.64329e-16	0.213995	0.0658589	0.0660084	-4.01356e-15	3.24193	1	0.00137249	1
AU022252	-6.45557e-17	0.213972	0.0658592	0.0660087	-9.80207e-16	3.24158	1	0.00137413	1
Nell2	-1.42972e-16	0.213964	0.0658593	0.0660088	-2.17086e-15	3.24145	1	0.00137472	1
AU040320	5.59036e-16	0.213947	0.0658596	0.0660091	8.4883e-15	3.24118	1	0.00137597	1
Cisd2	6.98696e-17	0.213915	0.0658601	0.0660096	1.06088e-15	3.24066	1	0.00137834	1
Gm12680	1.14671e-16	0.21367	0.0658637	0.0660132	1.74104e-15	3.23678	1	0.00139635	1
Asic4	-3.31247e-16	-0.213622	0.0658644	0.0660139	-5.02923e-15	-3.23602	1	0.00139991	1
1700016D06Rik	4.37217e-17	0.2136	0.0658647	0.0660142	6.6381e-16	3.23567	1	0.00140152	1
Ino80b	2.86436e-16	0.213567	0.0658652	0.0660147	4.34882e-15	3.23514	1	0.00140401	1
Gm17079	1.3427e-16	0.213501	0.0658662	0.0660157	2.03853e-15	3.23409	1	0.00140894	1
1010001B22Rik	-3.67034e-16	0.213382	0.0658679	0.0660174	-5.57228e-15	3.23221	1	0.00141785	1
Samd9l	5.74193e-15	0.213345	0.0658684	0.066018	8.71726e-14	3.23162	1	0.00142061	1
B3gat3	-5.3375e-17	0.213248	0.0658699	0.0660194	-8.1031e-16	3.23009	1	0.00142791	1
Xcr1	-6.45915e-17	0.212772	0.0658769	0.0660264	-9.80489e-16	3.22253	1	0.00146434	1
Efcc1	-2.02756e-16	0.212664	0.0658785	0.066028	-3.07773e-15	3.22082	1	0.00147272	1
Gm15585	-1.8782e-16	0.212655	0.0658786	0.0660281	-2.851e-15	3.22068	1	0.00147341	1
Tcta	4.36917e-17	0.212596	0.0658795	0.066029	6.63206e-16	3.21974	1	0.001478	1
Mixl1	-6.83356e-17	0.212439	0.0658818	0.0660313	-1.03725e-15	3.21725	1	0.00149032	1
Zfp37	-6.83375e-17	0.212376	0.0658827	0.0660323	-1.03726e-15	3.21624	1	0.00149532	1
Nxt1	6.60861e-17	0.212261	0.0658844	0.0660339	1.00306e-15	3.21442	1	0.00150442	1
E230001N04Rik	-4.03358e-17	0.212243	0.0658846	0.0660342	-6.12218e-16	3.21414	1	0.00150581	1
Tmem25	-1.43023e-16	0.212239	0.0658847	0.0660343	-2.17081e-15	3.21408	1	0.00150612	1
Acbd3	8.4754e-17	0.212174	0.0658856	0.0660352	1.28638e-15	3.21304	1	0.00151133	1
Cfp	-2.51318e-16	0.21204	0.0658876	0.0660372	-3.81434e-15	3.21092	1	0.00152201	1
Anapc10	5.86076e-17	0.211915	0.0658894	0.066039	8.89485e-16	3.20893	1	0.00153208	1
DIP0	6.80326e-16	0.211685	0.0658928	0.0660424	1.03247e-14	3.2053	1	0.00155068	1
4921513I03Rik	6.04667e-17	0.211649	0.0658933	0.0660429	9.17646e-16	3.20472	1	0.00155364	1
Saal1	6.60661e-17	0.211591	0.0658942	0.0660438	1.00261e-15	3.2038	1	0.00155841	1
Gm26697	-1.30911e-16	0.211462	0.0658961	0.0660456	-1.98662e-15	3.20175	1	0.00156902	1
Polr3f	2.87203e-17	0.211423	0.0658966	0.0660462	4.35838e-16	3.20113	1	0.00157223	1
Nhsl1	-8.30119e-16	0.211412	0.0658968	0.0660464	-1.25973e-14	3.20096	1	0.00157311	1
Kdm5b	5.11186e-17	0.211216	0.0658996	0.0660492	7.75704e-16	3.19786	1	0.00158938	1
Gm14326	1.10863e-16	0.211175	0.0659002	0.0660498	1.68228e-15	3.19721	1	0.00159279	1
Tspan17	1.8181e-16	0.211164	0.0659004	0.06605	2.75886e-15	3.19703	1	0.00159375	1
Mboat7	-9.07815e-17	0.211053	0.065902	0.0660516	-1.37752e-15	3.19527	1	0.00160305	1
Gm24362	-1.95336e-16	0.211042	0.0659022	0.0660518	-2.96403e-15	3.19511	1	0.00160392	1
Mov10	-7.21198e-17	0.21076	0.0659063	0.0660559	-1.09428e-15	3.19062	1	0.00162787	1
Asl	9.87143e-17	0.210752	0.0659064	0.066056	1.4978e-15	3.19051	1	0.00162847	1
Tenm4	1.18316e-16	0.210675	0.0659075	0.0660571	1.79518e-15	3.18929	1	0.00163507	1
Lin7b	6.29211e-18	0.210631	0.0659081	0.0660578	9.54679e-17	3.18859	1	0.00163886	1
Skap2	2.5274e-16	0.210564	0.0659091	0.0660587	3.83467e-15	3.18753	1	0.00164462	1
Tirap	2.75143e-16	0.210534	0.0659095	0.0660592	4.17456e-15	3.18706	1	0.00164717	1
Gm28322	4.84251e-16	0.210499	0.0659101	0.0660597	7.34715e-15	3.1865	1	0.00165019	1
Usp14	-2.1029e-16	0.210445	0.0659108	0.0660605	-3.19053e-15	3.18564	1	0.00165491	1
Mtif2	-9.08004e-17	0.210421	0.0659112	0.0660608	-1.37762e-15	3.18525	1	0.001657	1
Ift88	8.09622e-17	0.210242	0.0659138	0.0660634	1.2283e-15	3.18243	1	0.00167253	1
Speer4d	-1.65488e-16	0.210232	0.0659139	0.0660636	-2.51066e-15	3.18227	1	0.00167338	1
Senp5	-3.59663e-16	0.210149	0.0659151	0.0660648	-5.45645e-15	3.18095	1	0.00168069	1
Gm4258	4.24491e-16	0.209995	0.0659174	0.066067	6.43974e-15	3.17851	1	0.00169429	1
Rin1	1.18295e-16	0.209981	0.0659176	0.0660672	1.79459e-15	3.17829	1	0.00169552	1
Gm25640	-1.19688e-18	0.209934	0.0659183	0.0660679	-1.81571e-17	3.17755	1	0.00169966	1
Arhgef26	-1.1322e-16	0.20993	0.0659183	0.066068	-1.71757e-15	3.17748	1	0.00170004	1
Cep170b	6.60147e-17	0.209868	0.0659192	0.0660688	1.00145e-15	3.17651	1	0.00170549	1
Trabd	4.73429e-17	0.209825	0.0659198	0.0660695	7.1819e-16	3.17582	1	0.00170937	1
Foxr1	5.1076e-17	0.209791	0.0659203	0.06607	7.74814e-16	3.17528	1	0.00171241	1
Gm17705	-3.85426e-17	0.209772	0.0659206	0.0660702	-5.84682e-16	3.17499	1	0.00171406	1
Slc32a1	-5.70112e-16	-0.209735	0.0659211	0.0660708	-8.6484e-15	-3.1744	1	0.00171735	1
Vcl	-1.50569e-16	0.209626	0.0659227	0.0660724	-2.28403e-15	3.17267	1	0.00172718	1
8030453O22Rik	-1.58041e-16	0.209514	0.0659243	0.066074	-2.39731e-15	3.1709	1	0.00173726	1
Cntn6	1.28169e-16	-0.20949	0.0659247	0.0660743	1.94417e-15	-3.17052	1	0.00173946	1
Gm4450	7.86674e-16	0.20925	0.0659281	0.0660778	1.19323e-14	3.16673	1	0.00176127	1
Gfm1	-1.28181e-16	0.209081	0.0659306	0.0660802	-1.94418e-15	3.16405	1	0.00177684	1
Rbmx	-6.09698e-17	0.209012	0.0659316	0.0660812	-9.24743e-16	3.16295	1	0.00178323	1
Eps15l1	1.55607e-16	0.208997	0.0659318	0.0660815	2.36012e-15	3.16272	1	0.0017846	1
Gm11636	-1.2445e-16	0.208978	0.0659321	0.0660817	-1.88755e-15	3.16242	1	0.00178635	1
Gm26853	-2.36367e-17	0.208753	0.0659353	0.066085	-3.58483e-16	3.15886	1	0.00180736	1
Dus2	1.50687e-18	0.208646	0.0659368	0.0660865	2.28533e-17	3.15717	1	0.0018174	1
Tusc2	1.18255e-16	0.208643	0.0659369	0.0660866	1.79346e-15	3.15712	1	0.00181768	1
Cnih2	-2.92498e-16	0.208511	0.0659388	0.0660885	-4.4359e-15	3.15503	1	0.00183016	1
Cdh13	2.40225e-16	-0.20836	0.0659409	0.0660906	3.64304e-15	-3.15264	1	0.00184456	1
Fgf1	-5.84984e-17	-0.208258	0.0659424	0.0660921	-8.87113e-16	-3.15103	1	0.00185434	1
Fgf5	1.38781e-16	0.208248	0.0659426	0.0660923	2.10457e-15	3.15086	1	0.00185533	1
Ccdc115	6.59648e-17	0.208198	0.0659433	0.066093	1.00033e-15	3.15008	1	0.00186011	1
Nipsnap1	-1.24475e-16	0.208157	0.0659439	0.0660936	-1.88759e-15	3.14943	1	0.00186408	1
Fancd2	-3.44786e-16	0.208137	0.0659442	0.0660939	-5.22846e-15	3.14911	1	0.00186604	1
B2	-1.61946e-16	0.207691	0.0659505	0.0661003	-2.45557e-15	3.14206	1	0.00190952	1
Gm15602	8.46142e-17	0.207495	0.0659533	0.0661031	1.28294e-15	3.13897	1	0.0019289	1
Zfp605	7.34097e-17	0.207422	0.0659544	0.0661041	1.11304e-15	3.1378	1	0.00193626	1
Slc4a4	3.86142e-17	-0.207375	0.0659551	0.0661048	5.85462e-16	-3.13707	1	0.00194089	1
5930403N24Rik	-3.86218e-17	0.207121	0.0659587	0.0661084	-5.85545e-16	3.13304	1	0.00196653	1
Myom2	-3.22413e-16	0.207098	0.065959	0.0661087	-4.88808e-15	3.13269	1	0.00196879	1
Me3	6.18261e-18	0.206965	0.0659609	0.0661106	9.37314e-17	3.13059	1	0.0019823	1
Ptafr	-8.34357e-17	0.206957	0.065961	0.0661108	-1.26492e-15	3.13045	1	0.00198321	1
Nudt16	2.67565e-16	0.206857	0.0659625	0.0661122	4.05633e-15	3.12887	1	0.00199342	1
Tle3	-9.09204e-17	0.206401	0.0659689	0.0661187	-1.37823e-15	3.12167	1	0.00204068	1
Gm11986	-8.77256e-18	0.206335	0.0659699	0.0661196	-1.32978e-16	3.12063	1	0.0020476	1
Slitrk2	1.432e-16	-0.206311	0.0659702	0.06612	2.17068e-15	-3.12025	1	0.00205013	1
Gm23158	-2.32819e-16	0.206273	0.0659708	0.0661205	-3.52913e-15	3.11966	1	0.00205408	1
Ica1l	-1.62481e-17	0.206089	0.0659734	0.0661231	-2.46282e-16	3.11675	1	0.00207357	1
Ccnt2	-3.22445e-16	0.206011	0.0659745	0.0661243	-4.88742e-15	3.11552	1	0.00208186	1
Phactr1	-6.85299e-17	0.205935	0.0659756	0.0661253	-1.03872e-15	3.11431	1	0.00209004	1
Zfp956	1.18174e-16	0.205911	0.0659759	0.0661257	1.79116e-15	3.11393	1	0.00209262	1
Rapgef4	1.03237e-16	0.205899	0.0659761	0.0661259	1.56476e-15	3.11374	1	0.00209393	1
Crcp	-1.73087e-16	0.205854	0.0659767	0.0661265	-2.62345e-15	3.11304	1	0.00209867	1
Sorl1	1.25638e-16	0.205771	0.0659779	0.0661277	1.90424e-15	3.11172	1	0.0021077	1
Sin3b	-6.85363e-17	0.205721	0.0659786	0.0661284	-1.03876e-15	3.11093	1	0.00211308	1
Prdm5	-4.3485e-17	-0.205678	0.0659792	0.066129	-6.59071e-16	-3.11026	1	0.00211767	1
Epha4	-3.11969e-17	0.205672	0.0659793	0.0661291	-4.72828e-16	3.11016	1	0.00211836	1
Ppp1r3f	1.33103e-16	0.20567	0.0659793	0.0661291	2.01734e-15	3.11013	1	0.00211856	1
Gm26215	1.53639e-16	0.205614	0.0659801	0.0661299	2.32856e-15	3.10924	1	0.00212467	1
Degs1	7.33481e-17	0.205356	0.0659838	0.0661336	1.11161e-15	3.10518	1	0.00215282	1
Fbxo32	1.05888e-16	-0.205353	0.0659838	0.0661336	1.60476e-15	-3.10513	1	0.00215314	1
H2-T24	-1.88039e-16	0.205331	0.0659841	0.0661339	-2.84976e-15	3.10478	1	0.00215557	1
Ubr3	1.14422e-16	0.205329	0.0659842	0.0661339	1.73409e-15	3.10474	1	0.00215587	1
Eif4ebp3	4.35552e-16	0.205292	0.0659847	0.0661345	6.60081e-15	3.10416	1	0.00215992	1
Gm13722	-1.45763e-15	0.20519	0.0659861	0.0661359	-2.209e-14	3.10255	1	0.00217123	1
Dusp5	3.45931e-16	0.205185	0.0659862	0.066136	5.24248e-15	3.10248	1	0.00217171	1
Pde1b	2.02982e-16	-0.205082	0.0659876	0.0661374	3.07607e-15	-3.10084	1	0.00218324	1
Gm29216	-1.18149e-16	-0.205078	0.0659877	0.0661375	-1.79047e-15	-3.10079	1	0.00218359	1
Gm28882	-5.92216e-17	0.205031	0.0659884	0.0661382	-8.97456e-16	3.10005	1	0.00218885	1
Ndrg3	5.84008e-17	0.204989	0.065989	0.0661388	8.85008e-16	3.09938	1	0.00219354	1
Tmem181a	1.25613e-16	0.204936	0.0659897	0.0661395	1.90352e-15	3.09854	1	0.00219953	1
Fbn2	1.67899e-15	0.204746	0.0659924	0.0661422	2.54421e-14	3.09554	1	0.00222096	1
Mir6982	-3.33687e-16	0.204693	0.0659931	0.066143	-5.05639e-15	3.0947	1	0.00222697	1
2900026A02Rik	1.10668e-16	0.204662	0.0659936	0.0661434	1.67695e-15	3.09422	1	0.00223045	1
Celf5	-1.43252e-16	0.204571	0.0659949	0.0661447	-2.17066e-15	3.09278	1	0.00224084	1
Tom1	-1.22716e-16	0.204546	0.0659952	0.066145	-1.85946e-15	3.09239	1	0.00224363	1
Slc27a1	9.5725e-17	0.204435	0.0659968	0.0661466	1.45045e-15	3.09063	1	0.00225642	1
Mir3470b	8.82557e-17	0.204396	0.0659973	0.0661471	1.33726e-15	3.09002	1	0.00226085	1
Camk4	-2.3767e-17	0.204392	0.0659974	0.0661472	-3.6012e-16	3.08995	1	0.00226137	1
Pcdh8	-5.09143e-17	-0.204377	0.0659976	0.0661474	-7.71457e-16	-3.08973	1	0.002263	1
Cracr2b	-1.71264e-16	0.204373	0.0659976	0.0661475	-2.595e-15	3.08966	1	0.00226347	1
Ctns	1.18127e-16	0.204349	0.065998	0.0661478	1.78986e-15	3.08928	1	0.00226627	1
Nfrkb	1.35716e-17	0.204315	0.0659985	0.0661483	2.05635e-16	3.08874	1	0.00227019	1
1110008P14Rik	2.89894e-16	0.204314	0.0659985	0.0661483	4.39243e-15	3.08872	1	0.00227032	1
Uchl1	3.59734e-17	0.204224	0.0659997	0.0661496	5.45054e-16	3.08731	1	0.0022807	1
Nubp2	2.15693e-15	0.204203	0.066	0.0661499	3.26808e-14	3.08697	1	0.00228316	1
Notch3	8.34071e-16	-0.20414	0.0660009	0.0661507	1.26373e-14	-3.08599	1	0.00229045	1
1700129C05Rik	-3.12437e-17	0.204103	0.0660014	0.0661513	-4.7338e-16	3.0854	1	0.00229476	1
Stxbp6	-9.57145e-17	-0.204082	0.0660017	0.0661516	-1.45018e-15	-3.08507	1	0.00229721	1
Ccdc60	1.97233e-16	0.204031	0.0660024	0.0661523	2.98827e-15	3.08426	1	0.00230317	1
Nebl	2.35847e-18	0.203951	0.0660036	0.0661534	3.57324e-17	3.083	1	0.0023126	1
Grn	-3.87167e-17	0.203943	0.0660037	0.0661535	-5.86584e-16	3.08288	1	0.00231348	1
Oip5	2.60009e-16	0.203907	0.0660042	0.066154	3.93928e-15	3.0823	1	0.00231776	1
Cfap61	-6.11235e-17	0.203866	0.0660048	0.0661546	-9.26047e-16	3.08166	1	0.00232256	1
Lsamp	9.19721e-17	0.203805	0.0660056	0.0661555	1.3934e-15	3.0807	1	0.00232978	1
Socs2	1.18107e-16	0.203674	0.0660075	0.0661573	1.7893e-15	3.07864	1	0.00234526	1
2700068H02Rik	6.08098e-18	0.203563	0.066009	0.0661589	9.21235e-17	3.07689	1	0.0023585	1
Slc45a1	-2.25436e-16	0.203444	0.0660107	0.0661605	-3.41514e-15	3.075	1	0.00237283	1
Ccndbp1	5.08848e-17	0.20339	0.0660114	0.0661613	7.70849e-16	3.07416	1	0.00237924	1
Ptchd4	3.87369e-17	-0.203266	0.0660132	0.066163	5.86806e-16	-3.0722	1	0.00239428	1
Crk	1.33029e-16	0.203196	0.0660142	0.066164	2.01516e-15	3.07109	1	0.0024028	1
Snora7a	-4.06086e-17	0.203109	0.0660154	0.0661652	-6.15139e-16	3.06973	1	0.00241332	1
Ints7	3.17349e-17	0.202963	0.0660174	0.0661673	4.80705e-16	3.06743	1	0.00243121	1
Cog8	1.40489e-16	0.20294	0.0660177	0.0661676	2.12806e-15	3.06706	1	0.00243408	1
Speer4b	2.84665e-17	0.202928	0.0660179	0.0661678	4.31194e-16	3.06687	1	0.00243558	1
Apba2	3.12256e-16	0.202893	0.0660184	0.0661683	4.72983e-15	3.06631	1	0.00243991	1
D530049I02Rik	9.94082e-17	0.202729	0.0660207	0.0661706	1.50571e-15	3.06373	1	0.00246016	1
Nos1ap	1.0314e-16	0.202657	0.0660217	0.0661716	1.56221e-15	3.06259	1	0.00246916	1
Nrn1l	9.78442e-18	0.202538	0.0660234	0.0661732	1.48196e-16	3.06072	1	0.00248404	1
Crispld1	1.5893e-15	0.20246	0.0660244	0.0661743	2.40714e-14	3.05949	1	0.00249382	1
Sort1	2.84517e-17	0.202432	0.0660248	0.0661747	4.30924e-16	3.05905	1	0.0024973	1
Aifm3	-8.35734e-17	0.202345	0.066026	0.0661759	-1.26576e-15	3.05768	1	0.00250829	1
Mdga1	-1.13446e-16	0.202334	0.0660262	0.0661761	-1.7182e-15	3.0575	1	0.00250971	1
Gm833	-2.03066e-16	0.202283	0.0660269	0.0661768	-3.0755e-15	3.0567	1	0.00251614	1
Nphp4	6.57852e-17	0.202185	0.0660283	0.0661782	9.96318e-16	3.05516	1	0.00252855	1
Rsg1	-1.05984e-16	0.202133	0.066029	0.0661789	-1.60512e-15	3.05434	1	0.00253521	1
Gm25950	-5.20468e-16	0.20212	0.0660292	0.0661791	-7.88239e-15	3.05414	1	0.00253685	1
Anapc5	5.83101e-17	0.201954	0.0660315	0.0661814	8.83065e-16	3.05152	1	0.00255816	1
Mgat4c	1.70329e-16	0.201817	0.0660334	0.0661833	2.57943e-15	3.04937	1	0.00257581	1
Gm12410	9.56434e-17	0.201702	0.066035	0.0661849	1.44837e-15	3.04755	1	0.00259074	1
Ap3s1	1.2308e-15	0.201692	0.0660351	0.066185	1.86386e-14	3.0474	1	0.00259206	1
Gm15634	2.29096e-18	0.201691	0.0660351	0.066185	3.46931e-17	3.04738	1	0.00259219	1
Tcl1b1	8.72391e-17	0.201616	0.0660362	0.0661861	1.32108e-15	3.0462	1	0.00260197	1
Capns2	8.91062e-17	0.201616	0.0660362	0.0661861	1.34935e-15	3.0462	1	0.00260197	1
Gbp11	8.91062e-17	0.201616	0.0660362	0.0661861	1.34935e-15	3.0462	1	0.00260197	1
Gbp3	8.91062e-17	0.201616	0.0660362	0.0661861	1.34935e-15	3.0462	1	0.00260197	1
Gm14777	8.91062e-17	0.201616	0.0660362	0.0661861	1.34935e-15	3.0462	1	0.00260197	1
Gm25633	8.1638e-17	0.201616	0.0660362	0.0661861	1.23626e-15	3.0462	1	0.00260197	1
Gm25799	8.1638e-17	0.201616	0.0660362	0.0661861	1.23626e-15	3.0462	1	0.00260197	1
Gm7083	8.91062e-17	0.201616	0.0660362	0.0661861	1.34935e-15	3.0462	1	0.00260197	1
Hpgd	8.91062e-17	0.201616	0.0660362	0.0661861	1.34935e-15	3.0462	1	0.00260197	1
Lrrc43	8.1638e-17	0.201616	0.0660362	0.0661861	1.23626e-15	3.0462	1	0.00260197	1
Psme2b	7.9771e-17	0.201616	0.0660362	0.0661861	1.20799e-15	3.0462	1	0.00260197	1
Rmrp	8.91062e-17	0.201616	0.0660362	0.0661861	1.34935e-15	3.0462	1	0.00260197	1
Snord55	8.07045e-17	0.201616	0.0660362	0.0661861	1.22213e-15	3.0462	1	0.00260197	1
Tcl1b2	7.9771e-17	0.201616	0.0660362	0.0661861	1.20799e-15	3.0462	1	0.00260197	1
Tcl1b3	8.91062e-17	0.201616	0.0660362	0.0661861	1.34935e-15	3.0462	1	0.00260197	1
Tcl1b4	7.9771e-17	0.201616	0.0660362	0.0661861	1.20799e-15	3.0462	1	0.00260197	1
Tcl1b5	8.91062e-17	0.201616	0.0660362	0.0661861	1.34935e-15	3.0462	1	0.00260197	1
Tmcc3os	8.1638e-17	0.201616	0.0660362	0.0661861	1.23626e-15	3.0462	1	0.00260197	1
Golim4	-4.62549e-17	0.201599	0.0660364	0.0661863	-7.00445e-16	3.04593	1	0.00260422	1
Pnn	1.34899e-17	0.201579	0.0660367	0.0661866	2.04278e-16	3.04562	1	0.00260681	1
Pou3f1	3.1595e-16	0.20156	0.066037	0.0661869	4.78444e-15	3.04532	1	0.00260929	1
Tanc1	2.30065e-16	0.201505	0.0660377	0.0661876	3.48384e-15	3.04445	1	0.00261656	1
Samd5	-1.13472e-16	0.201485	0.066038	0.0661879	-1.71828e-15	3.04413	1	0.00261916	1
Gm13039	-1.24677e-16	0.201395	0.0660392	0.0661892	-1.88792e-15	3.04272	1	0.002631	1
Lrrc3b	3.00179e-16	-0.201391	0.0660393	0.0661892	4.54546e-15	-3.04265	1	0.00263155	1
Zfp940	7.6959e-17	0.201234	0.0660415	0.0661914	1.16531e-15	3.04018	1	0.00265237	1
Stx19	1.1803e-16	0.201088	0.0660435	0.0661934	1.78715e-15	3.03788	1	0.00267183	1
Zbtb9	3.49542e-16	0.201075	0.0660437	0.0661936	5.29259e-15	3.03767	1	0.00267361	1
B1_Mm	-2.01334e-17	0.201027	0.0660443	0.0661943	-3.04846e-16	3.03692	1	0.00268003	1
Exd1	-3.507e-17	0.201017	0.0660445	0.0661944	-5.31006e-16	3.03676	1	0.00268139	1
Prdm2	-3.30868e-16	-0.200933	0.0660456	0.0661956	-5.00968e-15	-3.03545	1	0.00269257	1
Cd34	1.85237e-16	0.200872	0.0660465	0.0661964	2.80464e-15	3.03448	1	0.00270087	1
Glra2	4.25441e-17	-0.200819	0.0660472	0.0661971	6.44147e-16	-3.03366	1	0.002708	1
Grik4	6.57442e-17	0.200813	0.0660473	0.0661972	9.9541e-16	3.03355	1	0.00270892	1
Snap23	-2.70324e-16	0.200778	0.0660478	0.0661977	-4.09286e-15	3.03301	1	0.00271358	1
Churc1	-1.56902e-16	0.200757	0.0660481	0.066198	-2.37558e-15	3.03267	1	0.00271651	1
Mecr	5.13832e-16	0.200727	0.0660485	0.0661984	7.77961e-15	3.03221	1	0.00272047	1
Phlpp1	6.63194e-16	0.200707	0.0660488	0.0661987	1.0041e-14	3.03188	1	0.00272332	1
Top2b	-2.97249e-16	-0.200542	0.066051	0.066201	-4.5003e-15	-3.0293	1	0.00274576	1
Gm12031	-5.37549e-17	0.200531	0.0660512	0.0662011	-8.13838e-16	3.02912	1	0.0027473	1
6720483E21Rik	3.86865e-16	0.200474	0.066052	0.0662019	5.85698e-15	3.02822	1	0.00275514	1
Gm27903	3.58585e-17	0.200379	0.0660533	0.0662032	5.42873e-16	3.02673	1	0.00276826	1
Dalrd3	1.3481e-16	0.200316	0.0660542	0.0662041	2.0409e-15	3.02573	1	0.00277705	1
Gpr26	-3.88307e-17	0.200126	0.0660568	0.0662067	-5.87838e-16	3.02275	1	0.00280339	1
Slc35d2	-3.88332e-17	0.200044	0.0660579	0.0662079	-5.87866e-16	3.02145	1	0.00281497	1
Gm10800	-1.40402e-16	-0.200024	0.0660582	0.0662081	-2.12543e-15	-3.02114	1	0.00281771	1
B2_Mm2	-1.4944e-18	0.199974	0.0660589	0.0662088	-2.26222e-17	3.02036	1	0.0028247	1
Zfp609	-1.24721e-16	0.199921	0.0660596	0.0662096	-1.888e-15	3.01951	1	0.00283228	1
Gm16231	7.69161e-17	0.1998	0.0660613	0.0662112	1.16432e-15	3.01761	1	0.00284943	1
Cdc25c	-6.49791e-17	0.199797	0.0660613	0.0662113	-9.83619e-16	3.01757	1	0.00284977	1
Eif1a	6.8557e-16	0.199739	0.0660621	0.0662121	1.03777e-14	3.01665	1	0.00285804	1
Ppp1r14c	5.82414e-17	0.199653	0.0660633	0.0662132	8.816e-16	3.01531	1	0.00287025	1
Fam107a	7.50419e-17	0.199557	0.0660646	0.0662146	1.13589e-15	3.0138	1	0.00288398	1
Syt7	-1.50885e-18	0.199491	0.0660655	0.0662155	-2.28387e-17	3.01275	1	0.00289357	1
Ddx26b	-5.82345e-17	-0.199425	0.0660664	0.0662164	-8.81455e-16	-3.01172	1	0.00290301	1
Fxyd5	2.22323e-18	0.199423	0.0660664	0.0662164	3.36514e-17	3.01169	1	0.00290327	1
Sytl5	3.18908e-16	-0.199409	0.0660666	0.0662166	4.82707e-15	-3.01146	1	0.00290539	1
Gm13577	-1.62788e-16	-0.199381	0.066067	0.066217	-2.46398e-15	-3.01103	1	0.00290932	1
Gm17509	-1.65813e-16	0.19933	0.0660677	0.0662177	-2.50975e-15	3.01022	1	0.00291677	1
Dnajc1	-1.13538e-16	0.199265	0.0660686	0.0662186	-1.71849e-15	3.0092	1	0.00292618	1
Tmem135	1.32909e-16	0.199196	0.0660696	0.0662195	2.01166e-15	3.00811	1	0.00293626	1
Cmtr2	2.804e-16	0.199006	0.0660722	0.0662221	4.24385e-15	3.00513	1	0.00296408	1
Anks1b	-3.30126e-16	0.198908	0.0660735	0.0662235	-4.99634e-15	3.00359	1	0.00297851	1
Trpc5	-3.30128e-16	0.198843	0.0660744	0.0662244	-4.9963e-15	3.00256	1	0.00298816	1
Gm25035	-1.28488e-16	0.198826	0.0660746	0.0662246	-1.94458e-15	3.0023	1	0.00299067	1
Dhdh	1.45967e-16	0.198798	0.066075	0.066225	2.20911e-15	3.00186	1	0.00299476	1
1700024P16Rik	-1.13553e-16	0.198774	0.0660753	0.0662253	-1.71854e-15	3.00149	1	0.00299832	1
S100b	-1.28489e-16	0.198768	0.0660754	0.0662254	-1.94459e-15	3.00138	1	0.0029993	1
Cers2	1.81438e-16	0.198712	0.0660762	0.0662262	2.74589e-15	3.0005	1	0.00300768	1
Nek8	5.93115e-18	0.198548	0.0660784	0.0662284	8.97593e-17	2.99792	1	0.00303217	1
Ncald	4.6348e-17	-0.198482	0.0660793	0.0662293	7.01399e-16	-2.99689	1	0.00304206	1
Scg2	-2.08651e-17	-0.198469	0.0660795	0.0662295	-3.15758e-16	-2.99669	1	0.00304397	1
Gm26967	1.40353e-16	0.19839	0.0660806	0.0662306	2.12397e-15	2.99544	1	0.003056	1
Traf7	1.47821e-16	0.198375	0.0660808	0.0662308	2.23698e-15	2.99521	1	0.00305819	1
Gm23840	-2.92801e-16	0.198372	0.0660808	0.0662308	-4.43095e-15	2.99516	1	0.00305869	1
Gm7289	-5.69125e-16	0.198312	0.0660816	0.0662317	-8.61245e-15	2.99422	1	0.00306777	1
Jmy	4.32643e-17	0.19829	0.0660819	0.066232	6.54707e-16	2.99387	1	0.00307108	1
SINEB2_MU	1.04868e-16	0.197986	0.0660861	0.0662361	1.58683e-15	2.98909	1	0.0031176	1
Akap10	-1.02376e-16	0.197926	0.0660869	0.0662369	-1.54911e-15	2.98814	1	0.00312692	1
Kctd16	1.70209e-16	0.197823	0.0660883	0.0662383	2.57548e-15	2.98653	1	0.00314279	1
Brinp3	-4.98808e-16	-0.197815	0.0660884	0.0662384	-7.54759e-15	-2.9864	1	0.00314406	1
Vamp3	2.17176e-18	0.1977	0.06609	0.06624	3.28606e-17	2.98461	1	0.00316184	1
Ppef2	-1.81735e-16	0.197602	0.0660913	0.0662413	-2.74975e-15	2.98306	1	0.00317728	1
4430402I18Rik	-5.31805e-16	0.197596	0.0660914	0.0662414	-8.04652e-15	2.98296	1	0.0031782	1
Mir344g	-2.37409e-16	-0.197375	0.0660944	0.0662444	-3.59197e-15	-2.9795	1	0.00321295	1
Dnajc11	5.58347e-17	0.197214	0.0660966	0.0662466	8.44744e-16	2.97696	1	0.00323861	1
Rmnd1	1.40317e-16	0.197153	0.0660974	0.0662474	2.12288e-15	2.97601	1	0.00324821	1
4930473D10Rik	2.85916e-19	0.197071	0.0660985	0.0662486	4.3256e-18	2.97472	1	0.00326137	1
Gabrg3	-5.88581e-18	-0.19703	0.0660991	0.0662491	-8.90453e-17	-2.97408	1	0.00326799	1
Gm24845	-1.62148e-16	0.197018	0.0660992	0.0662493	-2.4531e-15	2.97389	1	0.00326992	1
Sun1	-2.39875e-17	0.197008	0.0660994	0.0662494	-3.62901e-16	2.97374	1	0.00327143	1
Gm16092	1.13608e-16	-0.196919	0.0661006	0.0662506	1.71872e-15	-2.97234	1	0.00328581	1
Gm17089	-1.13611e-16	0.196827	0.0661018	0.0662519	-1.71873e-15	2.97089	1	0.0033007	1
Edil3	3.14619e-17	-0.196801	0.0661022	0.0662522	4.75958e-16	-2.97048	1	0.00330496	1
Gm15413	-2.29369e-16	0.196788	0.0661023	0.0662524	-3.4699e-15	2.97028	1	0.00330706	1
Gnai2	-1.58422e-16	0.196765	0.0661027	0.0662527	-2.3966e-15	2.96992	1	0.00331081	1
Sall1	9.49425e-17	-0.196759	0.0661027	0.0662528	1.43629e-15	-2.96982	1	0.00331175	1
Kcnh3	2.0813e-17	0.196722	0.0661032	0.0662533	3.14855e-16	2.96925	1	0.00331774	1
Actr3b	-4.64015e-17	0.196692	0.0661036	0.0662537	-7.0195e-16	2.96877	1	0.00332272	1
Otud7a	-9.06531e-18	0.196535	0.0661058	0.0662558	-1.37133e-16	2.96631	1	0.00334837	1
Cabp7	6.56155e-17	0.196507	0.0661061	0.0662562	9.92579e-16	2.96587	1	0.00335297	1
R3hdm2	-1.26693e-16	0.196411	0.0661074	0.0662575	-1.91647e-15	2.96436	1	0.00336883	1
Asic3	6.74791e-17	0.196392	0.0661077	0.0662578	1.02075e-15	2.96406	1	0.00337194	1
Meis2	1.25356e-16	0.196353	0.0661082	0.0662583	1.89623e-15	2.96344	1	0.00337845	1
Dmd	1.21622e-16	0.196342	0.0661084	0.0662585	1.83973e-15	2.96327	1	0.00338027	1
BC051142	-6.13486e-17	0.196329	0.0661085	0.0662586	-9.27999e-16	2.96307	1	0.00338241	1
Adam11	-3.07802e-16	0.196205	0.0661102	0.0662603	-4.65589e-15	2.96112	1	0.00340303	1
Tekt2	1.49621e-16	0.196121	0.0661114	0.0662614	2.26316e-15	2.9598	1	0.00341706	1
Gm805	-4.64211e-17	0.196034	0.0661125	0.0662626	-7.02153e-16	2.95845	1	0.00343154	1
Dffb	1.44017e-16	0.196014	0.0661128	0.0662629	2.17835e-15	2.95813	1	0.00343493	1
Gm15690	2.22431e-16	0.19598	0.0661133	0.0662633	3.3644e-15	2.9576	1	0.00344065	1
Vmn1r-ps151	-4.64229e-17	0.195973	0.0661133	0.0662634	-7.02172e-16	2.95749	1	0.00344178	1
Cdk7	-1.13636e-16	0.195973	0.0661133	0.0662634	-1.71881e-15	2.95749	1	0.0034418	1
Sox2	-3.19926e-17	-0.195966	0.0661134	0.0662635	-4.83905e-16	-2.95737	1	0.00344304	1
Cdc14a	2.44835e-16	0.195938	0.0661138	0.0662639	3.70323e-15	2.95693	1	0.00344783	1
Nmd3	-3.89601e-17	0.195795	0.0661157	0.0662658	-5.89271e-16	2.9547	1	0.00347187	1
A730036I17Rik	2.10865e-18	0.195588	0.0661185	0.0662686	3.1892e-17	2.95144	1	0.00350724	1
C1s1	-2.8915e-16	0.19558	0.0661186	0.0662687	-4.3732e-15	2.95132	1	0.00350852	1
Asap1	-4.64351e-17	0.195564	0.0661188	0.0662689	-7.02298e-16	2.95107	1	0.00351126	1
1810019D21Rik	3.60575e-16	0.195408	0.066121	0.0662711	5.45327e-15	2.94861	1	0.00353826	1
Ezr	-8.75153e-17	0.19539	0.0661212	0.0662713	-1.32356e-15	2.94833	1	0.00354131	1
2010015M23Rik	-1.32325e-16	0.195375	0.0661214	0.0662715	-2.00124e-15	2.9481	1	0.00354393	1
Dhx37	-1.39796e-16	0.195273	0.0661228	0.0662729	-2.11419e-15	2.9465	1	0.00356152	1
Suclg1	3.57056e-17	0.195261	0.0661229	0.066273	5.39989e-16	2.94632	1	0.0035636	1
Pde7b	1.54736e-16	-0.195157	0.0661243	0.0662744	2.34007e-15	-2.94468	1	0.00358172	1
D930015E06Rik	1.32788e-16	0.195148	0.0661244	0.0662746	2.00816e-15	2.94454	1	0.00358335	1
Gm15484	5.28599e-16	0.195064	0.0661256	0.0662757	7.99386e-15	2.94322	1	0.00359808	1
Gm8087	3.02616e-18	0.195052	0.0661257	0.0662758	4.57637e-17	2.94303	1	0.00360013	1
Timeless	1.66392e-16	0.195045	0.0661258	0.0662759	2.5163e-15	2.94292	1	0.00360134	1
Zmat4	-1.62647e-16	-0.194688	0.0661306	0.0662807	-2.45949e-15	-2.93733	1	0.0036644	1
Tnni3k	1.42134e-17	0.194548	0.0661325	0.0662826	2.14923e-16	2.93513	1	0.0036895	1
Vstm5	-1.02897e-16	-0.19453	0.0661327	0.0662828	-1.55592e-15	-2.93485	1	0.00369264	1
Btbd10	-2.92917e-16	0.194474	0.0661335	0.0662836	-4.42918e-15	2.93397	1	0.00370277	1
Klk8	-6.21518e-16	0.194419	0.0661342	0.0662843	-9.39784e-15	2.93311	1	0.00371268	1
Ext1	-1.06216e-16	0.19437	0.0661349	0.066285	-1.60605e-15	2.93233	1	0.00372162	1
1600029O15Rik	1.99977e-16	0.194323	0.0661355	0.0662856	3.02375e-15	2.9316	1	0.00373002	1
Lrrc48	-4.27397e-17	0.194271	0.0661362	0.0662863	-6.46238e-16	2.93079	1	0.0037394	1
Vmn1r-ps128	-1.17421e-16	0.194269	0.0661362	0.0662863	-1.77545e-15	2.93076	1	0.0037398	1
Rragd	3.00392e-16	-0.19424	0.0661366	0.0662867	4.542e-15	-2.93029	1	0.00374518	1
Mylk	1.47695e-16	0.194163	0.0661376	0.0662878	2.23315e-15	2.92909	1	0.00375911	1
Nuak2	4.68737e-17	0.194118	0.0661382	0.0662884	7.08724e-16	2.92838	1	0.00376737	1
Il16	-3.15446e-17	0.19403	0.0661394	0.0662895	-4.76942e-16	2.92701	1	0.00378345	1
Unc5a	1.1035e-16	0.194028	0.0661394	0.0662896	1.66845e-15	2.92698	1	0.00378375	1
Plbd1	-1.26765e-16	0.193994	0.0661399	0.06629	-1.91662e-15	2.92645	1	0.00378998	1
6530403H02Rik	5.79259e-18	0.193909	0.066141	0.0662912	8.75794e-17	2.92512	1	0.00380564	1
Cdc42se2	1.10346e-16	0.193892	0.0661412	0.0662914	1.66835e-15	2.92484	1	0.00380882	1
Nrros	1.13931e-17	0.193888	0.0661413	0.0662914	1.72254e-16	2.92479	1	0.0038095	1
Gins4	5.54702e-16	0.193861	0.0661416	0.0662918	8.38657e-15	2.92436	1	0.00381457	1
Marcks	2.70533e-16	-0.193791	0.0661426	0.0662927	4.09015e-15	-2.92326	1	0.00382754	1
Chd8	2.29834e-16	0.193787	0.0661426	0.0662928	3.47482e-15	2.92321	1	0.00382817	1
Chrng	1.25279e-16	0.193779	0.0661427	0.0662929	1.89408e-15	2.92308	1	0.00382963	1
Pdcd5	1.32551e-17	0.193718	0.0661435	0.0662937	2.00398e-16	2.92212	1	0.003841	1
Gm15823	3.56564e-17	0.193613	0.0661449	0.0662951	5.39065e-16	2.92048	1	0.00386053	1
Dffa	-4.83618e-17	0.193568	0.0661455	0.0662957	-7.31143e-16	2.91977	1	0.00386901	1
Cald1	3.38924e-17	-0.193564	0.0661456	0.0662958	5.1239e-16	-2.9197	1	0.00386979	1
Dfna5	-2.78011e-16	0.193483	0.0661467	0.0662968	-4.20294e-15	2.91844	1	0.00388491	1
Snx22	-6.89025e-17	0.19346	0.066147	0.0662971	-1.04166e-15	2.91807	1	0.0038893	1
Sel1l	-1.43585e-16	0.193438	0.0661473	0.0662974	-2.17068e-15	2.91772	1	0.00389348	1
Miip	2.07137e-17	0.193399	0.0661478	0.066298	3.13142e-16	2.91711	1	0.00390086	1
A430108G06Rik	2.74629e-16	0.193316	0.0661489	0.0662991	4.15168e-15	2.91582	1	0.00391647	1
Smpd3	-2.40994e-17	0.193261	0.0661496	0.0662998	-3.64317e-16	2.91496	1	0.00392682	1
Dlx1	-1.10327e-16	-0.193232	0.06615	0.0663002	-1.66783e-15	-2.91451	1	0.00393228	1
Fbxo44	-2.63083e-16	0.193182	0.0661507	0.0663008	-3.97703e-15	2.91372	1	0.0039418	1
Dsp	-2.29816e-16	-0.193182	0.0661507	0.0663008	-3.47413e-15	-2.91372	1	0.00394182	1
Catsper2	6.70174e-18	0.193093	0.0661519	0.066302	1.01308e-16	2.91233	1	0.00395878	1
Mpped1	5.80443e-17	0.193055	0.0661524	0.0663025	8.77433e-16	2.91173	1	0.00396607	1
Mir496a	1.47709e-17	-0.19304	0.0661526	0.0663027	2.23285e-16	-2.91149	1	0.00396906	1
Kcnq5	1.1032e-16	0.192995	0.0661532	0.0663033	1.66764e-15	2.91078	1	0.00397766	1
Gm5611	5.5094e-16	0.192944	0.0661538	0.066304	8.32816e-15	2.90999	1	0.00398746	1
Gm7841	1.4579e-16	0.192892	0.0661545	0.0663047	2.20379e-15	2.90917	1	0.00399744	1
Car2	2.67146e-16	0.192824	0.0661554	0.0663056	4.03816e-15	2.90811	1	0.00401049	1
Ccar1	2.59678e-16	0.192814	0.0661556	0.0663057	3.92526e-15	2.90795	1	0.00401253	1
Fam120a	2.74611e-16	0.192727	0.0661567	0.0663069	4.15092e-15	2.90658	1	0.00402942	1
Plet1	6.55009e-17	0.19267	0.0661575	0.0663077	9.90076e-16	2.90569	1	0.00404046	1
Raver2	-1.88419e-16	0.1926	0.0661584	0.0663086	-2.848e-15	2.9046	1	0.00405407	1
9430015G10Rik	-1.88421e-16	0.192542	0.0661592	0.0663094	-2.84799e-15	2.90369	1	0.00406549	1
Btbd3	-2.52197e-16	-0.192386	0.0661612	0.0663114	-3.81185e-15	-2.90125	1	0.00409599	1
Car5b	1.32151e-17	0.19238	0.0661613	0.0663115	1.9974e-16	2.90115	1	0.00409725	1
Zcchc12	1.88426e-16	-0.192378	0.0661613	0.0663115	2.84797e-15	-2.90113	1	0.00409755	1
F8a	4.30875e-17	0.192372	0.0661614	0.0663116	6.51248e-16	2.90103	1	0.00409876	1
Pvrl1	1.28969e-16	0.192305	0.0661623	0.0663125	1.94929e-15	2.89998	1	0.00411206	1
Jakmip1	8.04253e-17	0.192269	0.0661628	0.066313	1.21557e-15	2.89941	1	0.00411923	1
Ccnc	4.49501e-17	0.192224	0.0661634	0.0663136	6.79381e-16	2.89872	1	0.004128	1
Gm24271	1.77507e-16	0.192136	0.0661645	0.0663147	2.68282e-15	2.89734	1	0.00414555	1
Cox19	5.80139e-17	0.19204	0.0661658	0.066316	8.76797e-16	2.89583	1	0.00416468	1
Rpl13-ps5	-1.94037e-16	0.192039	0.0661658	0.066316	-2.93258e-15	2.89581	1	0.004165	1
Pou2f3-rs1	-9.2013e-18	0.191983	0.0661665	0.0663168	-1.39063e-16	2.89493	1	0.0041762	1
Gm9006	-2.60061e-17	0.191937	0.0661672	0.0663174	-3.93036e-16	2.89421	1	0.00418544	1
Arpp19	-2.40718e-16	0.191856	0.0661682	0.0663184	-3.63797e-15	2.89295	1	0.00420165	1
Gm29199	-3.63943e-16	0.191844	0.0661684	0.0663186	-5.50026e-15	2.89277	1	0.00420404	1
Pcyt1b	1.831e-16	0.191837	0.0661685	0.0663187	2.76717e-15	2.89266	1	0.00420541	1
Baiap2	1.25221e-16	0.191825	0.0661686	0.0663188	1.89245e-15	2.89247	1	0.00420781	1
Gm5108	1.40157e-16	0.191812	0.0661688	0.066319	2.11817e-15	2.89227	1	0.00421045	1
Dnajc8	-2.18316e-16	0.191793	0.066169	0.0663193	-3.29936e-15	2.89197	1	0.00421436	1
Bola3	1.21485e-16	0.191769	0.0661694	0.0663196	1.83597e-15	2.89159	1	0.00421925	1
Cdk5rap1	8.78782e-17	0.191761	0.0661695	0.0663197	1.32808e-15	2.89146	1	0.00422095	1
Gm11416	-1.92182e-16	0.191644	0.066171	0.0663212	-2.90432e-15	2.88964	1	0.00424454	1
Serinc2	-4.46101e-16	0.191587	0.0661718	0.066322	-6.74156e-15	2.88874	1	0.0042562	1
Wbscr17	-1.11901e-16	0.191561	0.0661721	0.0663223	-1.69106e-15	2.88834	1	0.00426148	1
Arhgap5	5.24518e-16	-0.191553	0.0661722	0.0663224	7.92656e-15	-2.88821	1	0.00426309	1
Gm24515	-2.33264e-16	0.191397	0.0661743	0.0663245	-3.52499e-15	2.88577	1	0.00429512	1
Tfdp2	1.69184e-17	0.191351	0.0661749	0.0663251	2.55662e-16	2.88505	1	0.00430455	1
Gm26785	-9.13716e-17	0.191297	0.0661756	0.0663258	-1.38075e-15	2.88421	1	0.00431567	1
Ccdc175	-1.76322e-16	0.191294	0.0661756	0.0663258	-2.66446e-15	2.88415	1	0.00431641	1
Gm16183	-3.22886e-16	0.191273	0.0661759	0.0663261	-4.8792e-15	2.88383	1	0.00432059	1
Gm24893	5.05227e-17	0.191267	0.066176	0.0663262	7.6346e-16	2.88374	1	0.00432182	1
Fam184b	-4.12727e-16	-0.191199	0.0661769	0.0663271	-6.23672e-15	-2.88267	1	0.004336	1
Cep57	-2.03397e-16	0.191195	0.0661769	0.0663271	-3.07354e-15	2.8826	1	0.00433686	1
Ticam2	7.57606e-18	0.191112	0.066178	0.0663282	1.1448e-16	2.8813	1	0.00435412	1
Gm22197	6.35844e-17	0.191014	0.0661793	0.0663295	9.6079e-16	2.87977	1	0.00437452	1
Sass6	9.34568e-17	0.191005	0.0661794	0.0663296	1.41217e-15	2.87963	1	0.00437638	1
Mrpl2	-1.06318e-16	0.190952	0.0661801	0.0663303	-1.6065e-15	2.8788	1	0.00438757	1
Gm156	1.88674e-16	0.190923	0.0661805	0.0663307	2.85089e-15	2.87835	1	0.00439351	1
Nol9	-6.89829e-17	0.190768	0.0661825	0.0663328	-1.04231e-15	2.87592	1	0.00442631	1
Fgfr1op2	1.84932e-16	0.190685	0.0661836	0.0663338	2.79423e-15	2.87463	1	0.0044437	1
Mbnl2	-1.362e-16	0.190637	0.0661842	0.0663345	-2.0579e-15	2.87387	1	0.00445407	1
Gimap9	5.79717e-17	0.190628	0.0661843	0.0663346	8.75913e-16	2.87373	1	0.00445593	1
Gm22174	3.15622e-16	0.190582	0.0661849	0.0663352	4.76879e-15	2.87302	1	0.00446559	1
Lin9	-2.79153e-17	0.190523	0.0661857	0.066336	-4.21773e-16	2.8721	1	0.00447818	1
Sstr3	3.66026e-16	0.190372	0.0661877	0.0663379	5.53012e-15	2.86973	1	0.00451054	1
Rarg	-1.86789e-16	-0.190353	0.0661879	0.0663382	-2.82211e-15	-2.86944	1	0.00451458	1
Gm10132	7.47653e-17	0.190301	0.0661886	0.0663389	1.12958e-15	2.86862	1	0.00452593	1
Cpne8	-3.53913e-17	0.190262	0.0661891	0.0663394	-5.34699e-16	2.86801	1	0.00453433	1
Rps6kb2	-1.78475e-18	0.190255	0.0661892	0.0663395	-2.69644e-17	2.8679	1	0.00453585	1
Gm26601	6.54239e-17	0.190093	0.0661913	0.0663416	9.88406e-16	2.86537	1	0.00457092	1
Penk	-1.84915e-16	-0.190092	0.0661914	0.0663416	-2.79364e-15	-2.86534	1	0.00457122	1
Lpl	-3.82672e-16	0.189909	0.0661937	0.066344	-5.78109e-15	2.86248	1	0.00461115	1
Akr1cl	-3.9138e-17	0.189839	0.0661946	0.0663449	-5.91256e-16	2.8614	1	0.00462639	1
Mok	6.03124e-16	0.18982	0.0661949	0.0663452	9.11133e-15	2.86109	1	0.00463074	1
Gm23945	-8.58232e-17	0.189532	0.0661986	0.0663489	-1.29645e-15	2.8566	1	0.00469432	1
Kcnma1	5.66158e-18	0.189524	0.0661988	0.066349	8.55239e-17	2.85646	1	0.00469627	1
Qrich1	3.55328e-17	0.189477	0.0661994	0.0663497	5.36755e-16	2.85573	1	0.00470672	1
Mmd2	-7.649e-17	0.189466	0.0661995	0.0663498	-1.15545e-15	2.85557	1	0.00470905	1
Sat2	6.54046e-17	0.189446	0.0661998	0.06635	9.87989e-16	2.85526	1	0.00471347	1
Frmpd1os	1.40085e-16	0.189409	0.0662002	0.0663505	2.11608e-15	2.85468	1	0.00472176	1
Mfsd10	-1.73579e-16	0.189385	0.0662006	0.0663509	-2.62201e-15	2.85429	1	0.00472732	1
Fance	-9.27906e-18	0.18938	0.0662006	0.0663509	-1.40166e-16	2.85421	1	0.00472843	1
Scube1	1.31249e-17	0.18936	0.0662009	0.0663512	1.98258e-16	2.8539	1	0.00473288	1
Txndc11	-1.06366e-16	0.189342	0.0662011	0.0663514	-1.60672e-15	2.85363	1	0.00473682	1
Pisd-ps1	1.40082e-16	0.189312	0.0662015	0.0663518	2.116e-15	2.85316	1	0.0047436	1
Cd86	1.91936e-18	0.189251	0.0662023	0.0663526	2.89923e-17	2.85221	1	0.0047573	1
Auh	-5.31596e-17	0.18921	0.0662028	0.0663531	-8.02981e-16	2.85155	1	0.00476672	1
Smc3	1.68528e-17	0.189154	0.0662036	0.0663539	2.5456e-16	2.85068	1	0.0047793	1
Arhgdig	-1.27887e-15	0.18915	0.0662036	0.0663539	-1.93173e-14	2.85063	1	0.00478007	1
2310022A10Rik	-4.38291e-17	0.189054	0.0662049	0.0663552	-6.62022e-16	2.84912	1	0.00480206	1
Zfp566	-9.51732e-17	0.189039	0.0662051	0.0663554	-1.43755e-15	2.84889	1	0.0048053	1
Prss23os	2.25957e-16	0.188996	0.0662056	0.0663559	3.41295e-15	2.84822	1	0.00481516	1
Polr1b	-1.86274e-17	0.188941	0.0662063	0.0663566	-2.81354e-16	2.84735	1	0.0048278	1
Gm28319	-6.53069e-17	0.188825	0.0662078	0.0663581	-9.86392e-16	2.84554	1	0.00485435	1
F420014N23Rik	-2.42322e-17	0.188816	0.066208	0.0663583	-3.66002e-16	2.84541	1	0.0048563	1
Snora24	1.58738e-16	0.188812	0.066208	0.0663583	2.39756e-15	2.84534	1	0.0048572	1
Ptprr	5.63482e-18	0.188628	0.0662104	0.0663607	8.51047e-17	2.84246	1	0.00489972	1
Srsf10	-8.39834e-17	0.188622	0.0662105	0.0663608	-1.26843e-15	2.84237	1	0.00490109	1
Gm26789	1.8487e-16	0.188599	0.0662108	0.0663611	2.79214e-15	2.84201	1	0.00490637	1
Grm5	1.54997e-16	0.188582	0.066211	0.0663613	2.34095e-15	2.84175	1	0.00491035	1
Zfp933	1.2139e-16	0.188574	0.0662111	0.0663614	1.83338e-15	2.84163	1	0.0049121	1
Mir1187	1.04586e-16	0.188549	0.0662114	0.0663617	1.57957e-15	2.84123	1	0.00491801	1
Vmn1r-ps97	1.02719e-16	0.188547	0.0662114	0.0663618	1.55137e-15	2.84119	1	0.00491854	1
Prrt2	-8.77217e-17	0.188481	0.0662123	0.0663626	-1.32485e-15	2.84017	1	0.00493386	1
Pycr2	1.47524e-16	0.188414	0.0662132	0.0663635	2.22801e-15	2.83912	1	0.00494949	1
2310057M21Rik	-2.4247e-17	0.188321	0.0662144	0.0663647	-3.6619e-16	2.83766	1	0.00497129	1
Gm28172	-2.05613e-17	-0.188298	0.0662147	0.066365	-3.10525e-16	-2.83731	1	0.00497666	1
Sirpa	5.73204e-16	0.188232	0.0662155	0.0663658	8.65664e-15	2.83628	1	0.00499213	1
Faxc	-1.49146e-17	0.188228	0.0662156	0.0663659	-2.25243e-16	2.83622	1	0.00499308	1
BC030870	7.28361e-17	0.188218	0.0662157	0.066366	1.09998e-15	2.83606	1	0.00499549	1
Sema4a	1.30895e-17	0.188176	0.0662162	0.0663666	1.97678e-16	2.8354	1	0.00500539	1
Gm9917	-8.95991e-17	0.188135	0.0662168	0.0663671	-1.35312e-15	2.83476	1	0.00501502	1
Gm5862	-3.37917e-16	0.188106	0.0662171	0.0663675	-5.10316e-15	2.8343	1	0.00502198	1
Gm25894	2.446e-16	0.188079	0.0662175	0.0663678	3.69389e-15	2.83389	1	0.00502829	1
Clec4a2	-1.67865e-17	0.188064	0.0662177	0.066368	-2.53505e-16	2.83365	1	0.00503187	1
Gm26653	-5.02219e-16	0.188018	0.0662183	0.0663686	-7.58429e-15	2.83294	1	0.0050427	1
Gm10849	5.28388e-16	0.187992	0.0662186	0.0663689	7.97944e-15	2.83254	1	0.00504879	1
DQ267101	1.10169e-16	0.18796	0.066219	0.0663694	1.66371e-15	2.83203	1	0.00505658	1
Gm17250	1.73649e-16	0.187955	0.0662191	0.0663694	2.62233e-15	2.83195	1	0.00505772	1
Gm11655	9.52323e-17	0.18794	0.0662193	0.0663696	1.43814e-15	2.83172	1	0.00506118	1
Mir6935	-6.25335e-17	0.187914	0.0662196	0.0663699	-9.44336e-16	2.83131	1	0.00506746	1
Gm14156	-9.89409e-17	0.187913	0.0662196	0.06637	-1.49413e-15	2.83129	1	0.0050678	1
Ndufa12	2.29657e-16	0.187854	0.0662204	0.0663707	3.46807e-15	2.83038	1	0.00508179	1
Spsb2	1.66175e-16	0.18779	0.0662212	0.0663715	2.5094e-15	2.82938	1	0.00509708	1
Map3k4	-1.10162e-16	-0.187709	0.0662223	0.0663726	-1.66352e-15	-2.82812	1	0.00511651	1
Tnfrsf21	-1.86104e-18	0.187701	0.0662224	0.0663727	-2.8103e-17	2.82798	1	0.0051186	1
Ccdc84	-6.16066e-17	0.187693	0.0662225	0.0663728	-9.30298e-16	2.82785	1	0.00512057	1
Gm27032	1.30747e-17	0.187682	0.0662226	0.0663729	1.97436e-16	2.8277	1	0.00512301	1
Kcnab2	5.28378e-16	0.187665	0.0662228	0.0663732	7.97879e-15	2.82742	1	0.00512726	1
Chek2	8.02876e-17	0.18766	0.0662229	0.0663732	1.21238e-15	2.82734	1	0.00512847	1
Myo1d	-1.67987e-17	0.187658	0.0662229	0.0663733	-2.53668e-16	2.82731	1	0.00512889	1
Gm22107	1.3443e-16	0.187601	0.0662236	0.066374	2.02994e-15	2.82643	1	0.00514257	1
Srsf9	4.38757e-16	0.187567	0.0662241	0.0663744	6.62534e-15	2.82589	1	0.00515097	1
1700069L16Rik	1.0829e-16	0.187561	0.0662242	0.0663745	1.63521e-15	2.8258	1	0.00515236	1
Dars	5.04103e-17	0.187505	0.0662249	0.0663752	7.61199e-16	2.82493	1	0.00516585	1
Angpt2	-1.21358e-16	0.187494	0.066225	0.0663754	-1.83251e-15	2.82475	1	0.00516869	1
Ly9	1.86529e-18	0.187441	0.0662257	0.066376	2.81656e-17	2.82393	1	0.00518144	1
Rcor3	-1.06428e-16	0.187281	0.0662278	0.0663781	-1.607e-15	2.82142	1	0.00522065	1
Nrbf2	-1.13899e-16	0.187174	0.0662291	0.0663795	-1.71978e-15	2.81976	1	0.00524677	1
C330021F23Rik	-6.39568e-17	0.187146	0.0662295	0.0663799	-9.65684e-16	2.81932	1	0.00525374	1
Maf	-1.15745e-16	-0.187119	0.0662299	0.0663802	-1.74763e-15	-2.8189	1	0.00526043	1
Dnajc21	1.17612e-16	0.187109	0.06623	0.0663803	1.77581e-15	2.81874	1	0.00526284	1
Ddx50	-8.40305e-17	0.187046	0.0662308	0.0663811	-1.26875e-15	2.81776	1	0.00527841	1
Rassf5	9.32164e-18	0.187046	0.0662308	0.0663811	1.40745e-16	2.81776	1	0.00527846	1
Abracl	9.61513e-16	0.187027	0.066231	0.0663814	1.45176e-14	2.81747	1	0.00528307	1
Col11a1	1.17609e-16	0.187024	0.0662311	0.0663814	1.77574e-15	2.81742	1	0.00528378	1
Gm7195	1.45611e-16	0.186872	0.066233	0.0663834	2.19846e-15	2.81505	1	0.00532155	1
Gcsam	5.78584e-17	0.186834	0.0662335	0.0663839	8.73552e-16	2.81445	1	0.0053311	1
Ube4bos1	3.22978e-16	0.18682	0.0662337	0.066384	4.87634e-15	2.81423	1	0.00533459	1
Gm13389	2.07218e-16	0.18671	0.0662351	0.0663855	3.12852e-15	2.81251	1	0.00536225	1
Cpsf1	2.79808e-17	0.186668	0.0662356	0.066386	4.22443e-16	2.81185	1	0.0053728	1
Strbp	5.03796e-17	0.186477	0.0662381	0.0663885	7.60583e-16	2.80887	1	0.00542099	1
Mettl5os	6.905e-17	0.186477	0.0662381	0.0663885	1.04245e-15	2.80887	1	0.00542102	1
1700034K08Rik	9.31623e-16	0.186473	0.0662381	0.0663885	1.40648e-14	2.80882	1	0.00542184	1
Nav3	-2.03538e-16	0.186471	0.0662382	0.0663885	-3.07283e-15	2.80878	1	0.00542252	1
Numbl	-1.68376e-17	0.186355	0.0662396	0.06639	-2.54192e-16	2.80698	1	0.00545191	1
Gm4665	7.27799e-17	0.186337	0.0662399	0.0663902	1.09873e-15	2.8067	1	0.00545648	1
Bloc1s3	1.1012e-16	0.186297	0.0662404	0.0663908	1.66242e-15	2.80608	1	0.00546663	1
Slc48a1	-1.30324e-17	-0.186264	0.0662408	0.0663912	-1.96742e-16	-2.80555	1	0.00547528	1
Usp48	6.53087e-17	0.186235	0.0662412	0.0663916	9.85923e-16	2.8051	1	0.00548267	1
Arhgef25	7.27764e-17	0.186221	0.0662414	0.0663917	1.09866e-15	2.80488	1	0.00548617	1
Ppnr	-1.04516e-16	-0.186205	0.0662416	0.0663919	-1.5778e-15	-2.80463	1	0.00549034	1
Gm13192	7.37883e-17	-0.186157	0.0662422	0.0663926	1.11392e-15	-2.80388	1	0.00550271	1
Speer4a	-1.10197e-16	0.186118	0.0662427	0.066393	-1.66353e-15	2.80328	1	0.00551252	1
Tnks1bp1	-1.62474e-16	0.186104	0.0662428	0.0663932	-2.45271e-15	2.80305	1	0.00551629	1
Hmgn3	-5.41866e-17	0.18608	0.0662431	0.0663935	-8.17996e-16	2.80269	1	0.00552232	1
Gm26870	-3.16963e-17	-0.186047	0.0662436	0.066394	-4.78482e-16	-2.80218	1	0.0055308	1
Aspdh	-1.30741e-16	0.185875	0.0662458	0.0663962	-1.97358e-15	2.79948	1	0.00557558	1
Ttc21b	2.14661e-16	0.185867	0.0662459	0.0663963	3.24037e-15	2.79936	1	0.0055775	1
6330403N20Rik	-1.51283e-16	0.185729	0.0662476	0.066398	-2.2836e-15	2.7972	1	0.0056136	1
Gm10471	2.94938e-16	0.185677	0.0662483	0.0663987	4.45201e-15	2.79639	1	0.00562721	1
Rph3a	-3.34144e-16	-0.185605	0.0662492	0.0663996	-5.04374e-15	-2.79527	1	0.00564617	1
Tmem80	-9.90105e-17	0.185582	0.0662495	0.0663999	-1.49451e-15	2.79491	1	0.00565215	1
Nipa2	5.782e-17	0.185548	0.0662499	0.0664003	8.72756e-16	2.79439	1	0.00566099	1
Grin2d	6.10586e-16	-0.185389	0.066252	0.0664024	9.21612e-15	-2.7919	1	0.00570322	1
Sparcl1	1.43826e-16	-0.185375	0.0662521	0.0664025	2.17088e-15	-2.79168	1	0.00570691	1
Adamts7	1.64234e-16	0.185286	0.0662533	0.0664037	2.47888e-15	2.7903	1	0.00573043	1
Anxa2	1.64234e-16	0.185286	0.0662533	0.0664037	2.47888e-15	2.7903	1	0.00573043	1
Gm17619	1.633e-16	0.185286	0.0662533	0.0664037	2.46478e-15	2.7903	1	0.00573043	1
Gm20667	1.633e-16	0.185286	0.0662533	0.0664037	2.46478e-15	2.7903	1	0.00573043	1
Gm22926	1.64234e-16	0.185286	0.0662533	0.0664037	2.47888e-15	2.7903	1	0.00573043	1
Gm25121	1.64234e-16	0.185286	0.0662533	0.0664037	2.47888e-15	2.7903	1	0.00573043	1
Gm25563	1.55832e-16	0.185286	0.0662533	0.0664037	2.35206e-15	2.7903	1	0.00573043	1
Gm28866	1.64234e-16	0.185286	0.0662533	0.0664037	2.47888e-15	2.7903	1	0.00573043	1
Gm6244	1.64234e-16	0.185286	0.0662533	0.0664037	2.47888e-15	2.7903	1	0.00573043	1
Mir6899	1.64234e-16	0.185286	0.0662533	0.0664037	2.47888e-15	2.7903	1	0.00573043	1
Mir872	1.64234e-16	0.185286	0.0662533	0.0664037	2.47888e-15	2.7903	1	0.00573043	1
Plekhg2	1.64234e-16	0.185286	0.0662533	0.0664037	2.47888e-15	2.7903	1	0.00573043	1
Six5	1.55832e-16	0.185286	0.0662533	0.0664037	2.35206e-15	2.7903	1	0.00573043	1
Gm24010	1.56765e-16	0.185286	0.0662533	0.0664037	2.36615e-15	2.7903	1	0.00573043	1
Mgmt	1.56765e-16	0.185286	0.0662533	0.0664037	2.36615e-15	2.7903	1	0.00573043	1
Gm14106	1.633e-16	0.185286	0.0662533	0.0664037	2.46478e-15	2.7903	1	0.00573043	1
Sec14l4	-2.03574e-16	0.185265	0.0662535	0.0664039	-3.07266e-15	2.78997	1	0.00573606	1
Gm28722	-2.43386e-17	0.185256	0.0662537	0.0664041	-3.67355e-16	2.78982	1	0.00573858	1
Gm9964	-4.86102e-17	0.185255	0.0662537	0.0664041	-7.33698e-16	2.78981	1	0.00573885	1
A430046D13Rik	-2.40236e-18	0.185205	0.0662543	0.0664047	-3.62597e-17	2.78903	1	0.0057521	1
Polr2g	-1.26406e-15	0.185169	0.0662548	0.0664052	-1.90787e-14	2.78848	1	0.00576168	1
Gm16344	1.2998e-17	0.185114	0.0662555	0.0664059	1.9618e-16	2.78761	1	0.00577658	1
Ehd2	1.51156e-16	0.184995	0.066257	0.0664074	2.28135e-15	2.78577	1	0.00580838	1
Psmc6	3.18153e-17	-0.184968	0.0662573	0.0664077	4.80179e-16	-2.78535	1	0.00581564	1
Aaas	1.70827e-15	0.184958	0.0662574	0.0664079	2.57823e-14	2.78518	1	0.00581858	1
Ing4	-9.15615e-17	0.184941	0.0662576	0.0664081	-1.3819e-15	2.78492	1	0.00582292	1
Strn3	2.29569e-16	0.184921	0.0662579	0.0664083	3.46478e-15	2.78461	1	0.00582841	1
Ppox	-5.42213e-17	0.184919	0.0662579	0.0664083	-8.18337e-16	2.78458	1	0.00582894	1
Myadm	8.76737e-17	0.184911	0.066258	0.0664084	1.32322e-15	2.78446	1	0.00583103	1
Gm20529	1.78817e-18	0.18486	0.0662587	0.0664091	2.69876e-17	2.78365	1	0.00584509	1
Gm26779	6.36581e-16	0.184816	0.0662592	0.0664097	9.60743e-15	2.78297	1	0.0058569	1
Nfkbiz	1.67222e-17	0.184784	0.0662596	0.0664101	2.52374e-16	2.78246	1	0.00586573	1
Gm14665	5.21923e-17	0.184659	0.0662612	0.0664116	7.87675e-16	2.78052	1	0.00589968	1
Exoc6b	3.19178e-16	0.184612	0.0662618	0.0664122	4.81692e-15	2.77979	1	0.00591247	1
Chd7	1.92393e-16	-0.184556	0.0662625	0.066413	2.9035e-15	-2.77891	1	0.00592804	1
Ptpn18	5.59225e-17	0.18453	0.0662629	0.0664133	8.4395e-16	2.77851	1	0.00593517	1
Myo15b	-1.6626e-16	0.184376	0.0662648	0.0664152	-2.50903e-15	2.77611	1	0.00597749	1
Phxr4	1.06516e-16	-0.184344	0.0662652	0.0664156	1.60741e-15	-2.77562	1	0.00598632	1
Mro	-9.51227e-17	-0.184271	0.0662661	0.0664166	-1.43546e-15	-2.77448	1	0.00600654	1
Eps8	1.4386e-16	-0.18424	0.0662665	0.066417	2.17092e-15	-2.77399	1	0.00601534	1
Ksr1	-1.58798e-16	0.184183	0.0662672	0.0664177	-2.39632e-15	2.77311	1	0.00603105	1
Ablim1	-5.13336e-16	-0.184144	0.0662677	0.0664182	-7.7464e-15	-2.7725	1	0.00604193	1
Pepd	-2.9696e-16	0.184136	0.0662678	0.0664183	-4.48121e-15	2.77237	1	0.00604428	1
Wnt1	-1.78375e-17	0.184131	0.0662679	0.0664183	-2.69173e-16	2.77229	1	0.00604573	1
Tmem234	1.99672e-16	0.184099	0.0662683	0.0664188	3.01308e-15	2.77179	1	0.00605469	1
Fezf2	-1.96143e-16	0.18404	0.0662691	0.0664195	-2.95979e-15	2.77087	1	0.00607125	1
Tmem161b	1.38989e-17	0.184021	0.0662693	0.0664197	2.09733e-16	2.77057	1	0.00607662	1
Ddx19a	1.06317e-16	0.184004	0.0662695	0.0664199	1.60431e-15	2.77031	1	0.00608123	1
Pde2a	1.28719e-16	0.183911	0.0662707	0.0664211	1.94232e-15	2.76887	1	0.00610738	1
Lynx1	7.27037e-17	0.183786	0.0662723	0.0664227	1.09705e-15	2.76692	1	0.00614273	1
Galntl6	-3.93834e-16	-0.18376	0.0662726	0.066423	-5.94264e-15	-2.76651	1	0.00615017	1
B1_Mur3	1.3423e-17	0.183714	0.0662732	0.0664236	2.0254e-16	2.7658	1	0.00616311	1
Ndufaf4	5.02969e-17	0.183709	0.0662732	0.0664237	7.58933e-16	2.76572	1	0.00616451	1
Ubxn4	-2.33495e-16	0.18365	0.066274	0.0664244	-3.52318e-15	2.76479	1	0.00618158	1
Gm14057	6.33643e-17	0.183647	0.066274	0.0664245	9.56096e-16	2.76475	1	0.00618223	1
Gm17907	7.26986e-17	0.183617	0.0662744	0.0664248	1.09693e-15	2.76428	1	0.00619088	1
Gm11961	-1.02805e-16	0.18357	0.066275	0.0664254	-1.55118e-15	2.76355	1	0.00620435	1
Gm18737	3.06886e-17	0.183563	0.0662751	0.0664255	4.63049e-16	2.76343	1	0.00620641	1
Ppp2r2cos	-9.90731e-17	0.183488	0.066276	0.0664265	-1.49486e-15	2.76227	1	0.00622776	1
Tmem151a	1.2497e-16	0.18343	0.0662767	0.0664272	1.88558e-15	2.76138	1	0.00624434	1
Gm14049	-5.05359e-17	0.183291	0.0662785	0.066429	-7.62478e-16	2.7592	1	0.00628466	1
Gm26797	2.22052e-16	0.18327	0.0662788	0.0664292	3.35027e-15	2.75888	1	0.00629064	1
Ring1	6.895e-17	0.183131	0.0662805	0.066431	1.04028e-15	2.75671	1	0.00633094	1
5031410I06Rik	-2.40982e-16	0.183021	0.0662819	0.0664323	-3.63572e-15	2.755	1	0.00636304	1
Gm9830	1.29348e-17	0.182996	0.0662822	0.0664327	1.95147e-16	2.75461	1	0.00637041	1
Neu1	-3.7541e-16	0.182993	0.0662822	0.0664327	-5.66381e-15	2.75456	1	0.0063714	1
Rpp25	3.60477e-16	-0.182898	0.0662834	0.0664339	5.43841e-15	-2.75309	1	0.00639908	1
Otud6b	5.0583e-16	0.182881	0.0662836	0.0664341	7.6313e-15	2.75283	1	0.00640406	1
Pex11g	-1.0656e-16	0.182871	0.0662838	0.0664342	-1.60763e-15	2.75266	1	0.00640712	1
Serinc1	-1.12817e-16	-0.182857	0.0662839	0.0664344	-1.70203e-15	-2.75244	1	0.00641128	1
BC1_Rn	4.30808e-17	-0.182853	0.066284	0.0664345	6.49943e-16	-2.75238	1	0.0064125	1
Gm16567	4.20878e-16	0.18281	0.0662845	0.066435	6.34956e-15	2.75171	1	0.00642518	1
Gm26737	8.76107e-17	0.182805	0.0662846	0.0664351	1.32174e-15	2.75163	1	0.00642669	1
Creg1	-5.43168e-16	-0.182773	0.066285	0.0664355	-8.19443e-15	-2.75114	1	0.00643601	1
Gm12299	-1.84045e-16	0.182771	0.066285	0.0664355	-2.77657e-15	2.75111	1	0.00643657	1
Fam50a	6.52046e-17	0.18275	0.0662853	0.0664358	9.83696e-16	2.75078	1	0.00644288	1
Gm26871	1.92162e-16	0.182715	0.0662857	0.0664362	2.899e-15	2.75024	1	0.00645313	1
Gm11482	-2.01031e-18	0.182704	0.0662859	0.0664363	-3.03279e-17	2.75006	1	0.00645649	1
AV026068	5.95967e-17	0.182524	0.0662881	0.0664386	8.99055e-16	2.74725	1	0.00651012	1
Gm26587	-1.04704e-16	0.182474	0.0662887	0.0664392	-1.57952e-15	2.74648	1	0.006525	1
Krit1	-8.41671e-17	0.182473	0.0662887	0.0664392	-1.2697e-15	2.74647	1	0.00652519	1
Adra1b	1.51381e-16	-0.182468	0.0662888	0.0664393	2.28365e-15	-2.74639	1	0.00652678	1
Padi2	4.0873e-16	0.18241	0.0662895	0.06644	6.16583e-15	2.74548	1	0.00654425	1
Ggact	-1.96192e-16	0.182406	0.0662896	0.0664401	-2.95961e-15	2.74543	1	0.00654524	1
Gm5901	2.69006e-16	-0.182405	0.0662896	0.0664401	4.05805e-15	-2.7454	1	0.00654576	1
Zfp358	4.83896e-17	0.182361	0.0662901	0.0664406	7.29966e-16	2.74472	1	0.00655882	1
Qpct	-1.17468e-16	-0.182281	0.0662911	0.0664416	-1.772e-15	-2.74347	1	0.00658296	1
Gm19932	3.19106e-16	0.182215	0.066292	0.0664425	4.81365e-15	2.74245	1	0.00660287	1
Raly	2.41119e-17	0.182157	0.0662927	0.0664432	3.63719e-16	2.74154	1	0.00662052	1
Siglecf	-1.09985e-15	0.182122	0.0662931	0.0664436	-1.65907e-14	2.741	1	0.00663105	1
Gng8	-7.5779e-17	0.182015	0.0662945	0.066445	-1.14307e-15	2.73934	1	0.00666349	1
Ccer1	2.41074e-17	0.182004	0.0662946	0.0664451	3.6364e-16	2.73917	1	0.00666682	1
Carkd	-2.63418e-16	0.181976	0.066295	0.0664455	-3.97342e-15	2.73873	1	0.00667554	1
Cdh8	1.36127e-16	0.181907	0.0662958	0.0664463	2.05333e-15	2.73765	1	0.00669668	1
Zfp943	3.4897e-16	0.181903	0.0662959	0.0664464	5.26382e-15	2.7376	1	0.00669774	1
Gm19087	2.44751e-16	-0.181865	0.0662963	0.0664468	3.69177e-15	-2.73701	1	0.00670935	1
Mif	2.07072e-16	0.181827	0.0662968	0.0664473	3.12341e-15	2.73642	1	0.00672101	1
Wasf1	3.53036e-17	0.181802	0.0662971	0.0664476	5.32505e-16	2.73602	1	0.00672889	1
Pdk1	-1.36468e-16	0.181678	0.0662987	0.0664492	-2.05838e-15	2.7341	1	0.00676691	1
Slc9a1	1.21183e-16	0.181666	0.0662988	0.0664493	1.82784e-15	2.7339	1	0.00677081	1
Gm12124	1.28948e-17	0.181659	0.0662989	0.0664494	1.94495e-16	2.73379	1	0.00677295	1
Gm15904	-5.43193e-17	0.18164	0.0662991	0.0664497	-8.19306e-16	2.73349	1	0.00677889	1
Tbc1d13	1.02508e-16	0.18151	0.0663008	0.0664513	1.54611e-15	2.73148	1	0.00681901	1
Slc25a3	5.0229e-17	0.181437	0.0663017	0.0664522	7.57583e-16	2.73033	1	0.00684204	1
Zfyve9	3.93763e-16	0.181387	0.0663023	0.0664528	5.93891e-15	2.72955	1	0.00685769	1
Allc	4.48337e-18	0.181333	0.066303	0.0664535	6.76194e-17	2.72871	1	0.00687457	1
Oprl1	1.81851e-16	0.18129	0.0663035	0.066454	2.74271e-15	2.72805	1	0.00688798	1
Fam92a	2.2946e-16	0.181283	0.0663036	0.0664541	3.46076e-15	2.72795	1	0.00689004	1
Mapk11	1.39841e-16	0.181245	0.0663041	0.0664546	2.10909e-15	2.72736	1	0.00690198	1
Rnf165	8.00949e-17	0.18121	0.0663045	0.066455	1.20799e-15	2.72681	1	0.00691296	1
Fmn2	5.76899e-17	0.181193	0.0663047	0.0664552	8.70073e-16	2.72654	1	0.00691842	1
2019-09-09	-2.53944e-17	0.181162	0.0663051	0.0664556	-3.82993e-16	2.72607	1	0.00692814	1
Gm7361	1.51041e-16	0.181148	0.0663053	0.0664558	2.27796e-15	2.72584	1	0.00693273	1
2810454H06Rik	3.90171e-17	0.181113	0.0663057	0.0664562	5.88442e-16	2.72529	1	0.00694383	1
Mblac2	3.56413e-16	0.181072	0.0663062	0.0664567	5.37526e-15	2.72467	1	0.00695658	1
Chrd	-9.52833e-18	0.181035	0.0663067	0.0664572	-1.43701e-16	2.72409	1	0.00696834	1
Tmem129	-1.62238e-16	-0.180997	0.0663071	0.0664577	-2.44677e-15	-2.72349	1	0.00698049	1
Gm12583	7.89564e-16	0.180967	0.0663075	0.066458	1.19076e-14	2.72302	1	0.00699007	1
UCON87	-1.0249e-16	-0.180906	0.0663083	0.0664588	-1.54566e-15	-2.72209	1	0.00700931	1
Paip2b	1.28721e-17	0.180898	0.0663084	0.0664589	1.94124e-16	2.72195	1	0.00701204	1
Fam188b	1.36096e-16	0.18087	0.0663087	0.0664592	2.05246e-15	2.72152	1	0.00702091	1
Gm10571	-1.11287e-16	0.180859	0.0663089	0.0664594	-1.67832e-15	2.72135	1	0.00702448	1
Synj2	6.5148e-17	0.180858	0.0663089	0.0664594	9.82494e-16	2.72133	1	0.00702489	1
Fam173a	2.5932e-16	0.180839	0.0663091	0.0664596	3.91077e-15	2.72104	1	0.00703075	1
Gm17300	-5.80174e-18	0.180784	0.0663098	0.0664603	-8.74945e-17	2.72018	1	0.0070484	1
Gys1	-8.04837e-17	0.180774	0.0663099	0.0664604	-1.21375e-15	2.72002	1	0.00705179	1
Zfp710	-2.07389e-17	0.180755	0.0663101	0.0664607	-3.12757e-16	2.71974	1	0.00705763	1
Srpk1	-1.14096e-16	0.180606	0.066312	0.0664625	-1.72059e-15	2.71741	1	0.00710573	1
Strip1	-2.6346e-16	0.180584	0.0663123	0.0664628	-3.97301e-15	2.71707	1	0.00711293	1
Gm29443	6.32725e-17	0.180573	0.0663124	0.0664629	9.54158e-16	2.7169	1	0.00711636	1
Arhgap31	-2.55992e-16	0.18056	0.0663125	0.0664631	-3.86039e-15	2.7167	1	0.00712046	1
6030458C11Rik	6.51387e-17	0.180544	0.0663127	0.0664633	9.82295e-16	2.71645	1	0.00712564	1
Inpp5k	-2.07747e-18	0.180456	0.0663138	0.0664644	-3.13279e-17	2.71507	1	0.0071544	1
Rltpr	-4.42701e-16	0.1804	0.0663145	0.0664651	-6.67578e-15	2.7142	1	0.00717266	1
Fbxo21	-1.51443e-16	0.180387	0.0663147	0.0664652	-2.2837e-15	2.71401	1	0.00717664	1
Rbm4b	1.54751e-16	0.180364	0.066315	0.0664655	2.33358e-15	2.71365	1	0.00718416	1
Sipa1l2	2.07455e-16	-0.180364	0.066315	0.0664655	3.12833e-15	-2.71365	1	0.00718423	1
Rundc3a	-3.82957e-16	0.180348	0.0663152	0.0664657	-5.77481e-15	2.71339	1	0.0071896	1
Pcp4	-1.64083e-16	-0.18026	0.0663163	0.0664668	-2.47426e-15	-2.71203	1	0.00721834	1
Slc22a5	-1.51448e-16	0.180217	0.0663168	0.0664673	-2.2837e-15	2.71136	1	0.00723243	1
Spic	1.69681e-16	0.180135	0.0663178	0.0664684	2.5586e-15	2.71009	1	0.00725912	1
Map4k4	-7.67692e-17	0.180119	0.066318	0.0664686	-1.15759e-15	2.70984	1	0.00726452	1
Gm26483	4.98279e-16	0.180078	0.0663185	0.0664691	7.51342e-15	2.70921	1	0.00727789	1
Ttll5	-2.44955e-17	0.180002	0.0663194	0.06647	-3.69357e-16	2.70802	1	0.00730309	1
Satb2	-2.5601e-16	0.179946	0.0663201	0.0664707	-3.86022e-15	2.70715	1	0.00732175	1
Gpr4	-1.34654e-16	0.179909	0.0663206	0.0664711	-2.03035e-15	2.70658	1	0.00733382	1
Pcbp4	-1.58925e-16	0.179906	0.0663206	0.0664712	-2.39632e-15	2.70653	1	0.00733495	1
Klf10	-4.27783e-16	0.179792	0.066322	0.0664726	-6.45009e-15	2.70475	1	0.00737291	1
Snora78	-3.10139e-15	0.179743	0.0663226	0.0664732	-4.67621e-14	2.70399	1	0.00738928	1
C2cd3	-5.0643e-17	0.179704	0.0663231	0.0664737	-7.6358e-16	2.70339	1	0.00740229	1
Gm16907	4.64422e-17	0.179672	0.0663235	0.0664741	7.00238e-16	2.70289	1	0.00741293	1
Calb2	5.13671e-16	-0.179665	0.0663236	0.0664742	7.74491e-15	-2.70278	1	0.00741538	1
Gm11443	-7.67839e-17	0.179627	0.0663241	0.0664746	-1.15771e-15	2.70218	1	0.00742833	1
Gm23245	-1.82731e-16	-0.179493	0.0663257	0.0664763	-2.75505e-15	-2.7001	1	0.00747338	1
Arhgef6	7.72425e-17	0.179475	0.0663259	0.0664765	1.16459e-15	2.69982	1	0.00747943	1
Vipas39	1.3232e-16	0.179472	0.066326	0.0664765	1.995e-15	2.69979	1	0.00748024	1
Mir344b	-9.20692e-16	0.179458	0.0663261	0.0664767	-1.38813e-14	2.69957	1	0.00748499	1
Gm8864	-4.59839e-17	0.179421	0.0663266	0.0664772	-6.93294e-16	2.69899	1	0.00749759	1
Cnot4	-9.57895e-18	0.179341	0.0663276	0.0664782	-1.44419e-16	2.69774	1	0.00752494	1
Mus81	-4.1286e-16	0.179338	0.0663276	0.0664782	-6.22456e-15	2.6977	1	0.00752583	1
Oprm1	4.69212e-17	-0.179292	0.0663282	0.0664788	7.0741e-16	-2.69698	1	0.00754144	1
Gm27896	1.65582e-17	0.179292	0.0663282	0.0664788	2.4964e-16	2.69697	1	0.00754161	1
Gm29601	2.59272e-16	0.17923	0.066329	0.0664795	3.90888e-15	2.69602	1	0.00756256	1
Gm25759	4.0826e-17	0.179166	0.0663297	0.0664803	6.155e-16	2.69503	1	0.00758434	1
Gid8	1.99524e-16	0.179146	0.06633	0.0664806	3.00805e-15	2.69471	1	0.00759133	1
Pde6h	-7.30648e-17	0.179127	0.0663302	0.0664808	-1.10153e-15	2.69441	1	0.0075979	1
Sp1	2.18192e-16	0.179064	0.066331	0.0664816	3.28944e-15	2.69344	1	0.00761936	1
Chn1os1	-2.45258e-17	0.178987	0.0663319	0.0664825	-3.69744e-16	2.69225	1	0.00764585	1
4930529I22Rik	-5.25333e-17	0.178928	0.0663327	0.0664832	-7.91967e-16	2.69132	1	0.00766638	1
Chd1l	-2.1235e-18	0.178915	0.0663328	0.0664834	-3.20129e-17	2.69112	1	0.00767084	1
Rgs19	2.09643e-15	0.178909	0.0663329	0.0664835	3.16047e-14	2.69103	1	0.00767285	1
4933406I18Rik	2.75363e-15	0.178906	0.0663329	0.0664835	4.15123e-14	2.69098	1	0.00767395	1
Zfp157	3.89488e-17	0.178827	0.0663339	0.0664845	5.87163e-16	2.68976	1	0.00770115	1
Cep192	-2.11236e-16	0.178798	0.0663343	0.0664848	-3.18441e-15	2.6893	1	0.00771148	1
Slmap	3.52121e-17	0.178739	0.066335	0.0664856	5.30822e-16	2.68839	1	0.00773182	1
Gm15607	1.90176e-16	0.178734	0.066335	0.0664856	2.86691e-15	2.68832	1	0.00773344	1
Tcof1	1.70668e-17	-0.178681	0.0663357	0.0664863	2.5728e-16	-2.68749	1	0.00775207	1
Dlg2	-9.59869e-18	0.17868	0.0663357	0.0664863	-1.44699e-16	2.68747	1	0.00775248	1
Gm29392	8.80145e-17	-0.178679	0.0663357	0.0664863	1.3268e-15	-2.68745	1	0.00775282	1
AI118078	-9.92177e-17	0.178646	0.0663361	0.0664867	-1.49568e-15	2.68694	1	0.00776423	1
Trio	-9.92178e-17	0.178644	0.0663361	0.0664867	-1.49568e-15	2.68691	1	0.00776502	1
Zfp523	-1.16022e-16	0.178618	0.0663365	0.066487	-1.74899e-15	2.68652	1	0.00777388	1
Egln2	5.33378e-18	0.17855	0.0663373	0.0664879	8.04039e-17	2.68546	1	0.00779772	1
Eif3k	-2.44313e-16	-0.178487	0.0663381	0.0664887	-3.68285e-15	-2.68448	1	0.00781992	1
A130051J06Rik	1.14049e-15	0.178461	0.0663384	0.066489	1.7192e-14	2.68407	1	0.00782911	1
Luc7l	-9.17573e-17	0.178388	0.0663393	0.0664899	-1.38315e-15	2.68294	1	0.00785476	1
Gm14300	4.95039e-16	-0.17836	0.0663396	0.0664902	7.4622e-15	-2.68251	1	0.00786461	1
Chn1	1.27962e-17	0.178359	0.0663396	0.0664902	1.9289e-16	2.68249	1	0.00786496	1
Pdgfrb	-2.08114e-17	0.178329	0.06634	0.0664906	-3.13708e-16	2.68202	1	0.0078756	1
Mrps15	8.74769e-17	0.178326	0.06634	0.0664906	1.31861e-15	2.68198	1	0.00787667	1
Lrrtm3	-1.39754e-16	-0.178322	0.0663401	0.0664907	-2.10663e-15	-2.68191	1	0.00787829	1
Ankef1	-5.06845e-17	0.178315	0.0663402	0.0664908	-7.64009e-16	2.6818	1	0.00788061	1
Gdap2	-3.53146e-16	0.178302	0.0663403	0.0664909	-5.32324e-15	2.6816	1	0.00788516	1
Robo1	-8.66257e-17	0.178295	0.0663404	0.066491	-1.30578e-15	2.68149	1	0.00788776	1
Npy1r	-3.89328e-17	-0.178291	0.0663405	0.0664911	-5.86863e-16	-2.68143	1	0.00788916	1
Spink10	-9.92288e-17	0.178274	0.0663407	0.0664913	-1.49575e-15	2.68117	1	0.00789513	1
Gm22029	3.5197e-17	0.178234	0.0663411	0.0664918	5.30546e-16	2.68055	1	0.00790925	1
Gm22102	3.5197e-17	0.178234	0.0663411	0.0664918	5.30546e-16	2.68055	1	0.00790925	1
Gm22112	3.5197e-17	0.178234	0.0663411	0.0664918	5.30546e-16	2.68055	1	0.00790925	1
Gm22346	3.5197e-17	0.178234	0.0663411	0.0664918	5.30546e-16	2.68055	1	0.00790925	1
Gm22419	3.5197e-17	0.178234	0.0663411	0.0664918	5.30546e-16	2.68055	1	0.00790925	1
Gm22991	3.5197e-17	0.178234	0.0663411	0.0664918	5.30546e-16	2.68055	1	0.00790925	1
Gm23177	3.5197e-17	0.178234	0.0663411	0.0664918	5.30546e-16	2.68055	1	0.00790925	1
Gm23304	3.5197e-17	0.178234	0.0663411	0.0664918	5.30546e-16	2.68055	1	0.00790925	1
Gm23606	3.5197e-17	0.178234	0.0663411	0.0664918	5.30546e-16	2.68055	1	0.00790925	1
Gm23844	3.5197e-17	0.178234	0.0663411	0.0664918	5.30546e-16	2.68055	1	0.00790925	1
Gm24193	3.5197e-17	0.178234	0.0663411	0.0664918	5.30546e-16	2.68055	1	0.00790925	1
Gm24427	3.5197e-17	0.178234	0.0663411	0.0664918	5.30546e-16	2.68055	1	0.00790925	1
Gm24484	3.5197e-17	0.178234	0.0663411	0.0664918	5.30546e-16	2.68055	1	0.00790925	1
Gm24567	3.5197e-17	0.178234	0.0663411	0.0664918	5.30546e-16	2.68055	1	0.00790925	1
Gm24617	3.5197e-17	0.178234	0.0663411	0.0664918	5.30546e-16	2.68055	1	0.00790925	1
Gm24744	3.5197e-17	0.178234	0.0663411	0.0664918	5.30546e-16	2.68055	1	0.00790925	1
Gm24802	3.5197e-17	0.178234	0.0663411	0.0664918	5.30546e-16	2.68055	1	0.00790925	1
Gm25208	3.5197e-17	0.178234	0.0663411	0.0664918	5.30546e-16	2.68055	1	0.00790925	1
Gm25228	3.5197e-17	0.178234	0.0663411	0.0664918	5.30546e-16	2.68055	1	0.00790925	1
Gm25347	3.5197e-17	0.178234	0.0663411	0.0664918	5.30546e-16	2.68055	1	0.00790925	1
Gm25754	3.5197e-17	0.178234	0.0663411	0.0664918	5.30546e-16	2.68055	1	0.00790925	1
Gm25774	3.5197e-17	0.178234	0.0663411	0.0664918	5.30546e-16	2.68055	1	0.00790925	1
Gm25778	3.5197e-17	0.178234	0.0663411	0.0664918	5.30546e-16	2.68055	1	0.00790925	1
Gm26137	3.5197e-17	0.178234	0.0663411	0.0664918	5.30546e-16	2.68055	1	0.00790925	1
Gm26190	3.5197e-17	0.178234	0.0663411	0.0664918	5.30546e-16	2.68055	1	0.00790925	1
Gm26248	3.5197e-17	0.178234	0.0663411	0.0664918	5.30546e-16	2.68055	1	0.00790925	1
Gm26298	3.5197e-17	0.178234	0.0663411	0.0664918	5.30546e-16	2.68055	1	0.00790925	1
Fbxl12	5.90018e-17	0.178234	0.0663412	0.0664918	8.89369e-16	2.68054	1	0.00790948	1
A630023P12Rik	-3.57515e-17	0.178204	0.0663415	0.0664921	-5.38901e-16	2.68008	1	0.00791989	1
9530056K15Rik	-2.21666e-16	-0.17816	0.0663421	0.0664927	-3.34125e-15	-2.67939	1	0.00793571	1
Rtn4r	2.81643e-16	0.178129	0.0663424	0.066493	4.2453e-15	2.67891	1	0.00794693	1
Gm13783	-1.47777e-16	0.178118	0.0663426	0.0664932	-2.22748e-15	2.67874	1	0.00795078	1
Cabin1	-3.94893e-17	0.178078	0.0663431	0.0664937	-5.9523e-16	2.67812	1	0.00796501	1
Gm17276	-8.5602e-17	-0.178063	0.0663432	0.0664939	-1.29029e-15	-2.67788	1	0.00797041	1
Arhgef10	-1.33895e-15	0.178036	0.0663436	0.0664942	-2.01821e-14	2.67747	1	0.00797996	1
Wbscr22	-1.14174e-16	0.177964	0.0663444	0.0664951	-1.72093e-15	2.67635	1	0.0080057	1
Mast1	3.18978e-16	0.177932	0.0663448	0.0664955	4.80788e-15	2.67585	1	0.00801745	1
Tyw1	-2.64255e-17	0.177896	0.0663453	0.0664959	-3.98302e-16	2.67529	1	0.00803031	1
Dmpk	1.06132e-16	0.177812	0.0663463	0.0664969	1.59967e-15	2.67398	1	0.00806074	1
Nbl1	2.9657e-16	0.177793	0.0663465	0.0664971	4.47001e-15	2.6737	1	0.00806734	1
Olfr550	-1.04845e-16	0.177772	0.0663468	0.0664974	-1.58026e-15	2.67337	1	0.00807487	1
Brip1	-1.14935e-17	0.17775	0.0663471	0.0664977	-1.73233e-16	2.67302	1	0.00808312	1
Dcaf13	1.24799e-16	0.17771	0.0663475	0.0664982	1.88099e-15	2.67241	1	0.00809738	1
Zim1	2.63549e-16	-0.177597	0.0663489	0.0664995	3.97216e-15	-2.67065	1	0.00813855	1
Gm14554	2.55484e-16	0.177444	0.0663508	0.0665014	3.85051e-15	2.66827	1	0.00819452	1
Slc7a6	-1.14192e-16	0.177384	0.0663515	0.0665021	-1.72101e-15	2.66734	1	0.00821646	1
Zfp229	1.09853e-16	0.177372	0.0663517	0.0665023	1.65562e-15	2.66715	1	0.00822096	1
Ppp2r2c	-2.17292e-18	0.177261	0.066353	0.0665036	-3.27479e-17	2.66543	1	0.00826195	1
Fam166b	1.4719e-16	0.177259	0.066353	0.0665037	2.21829e-15	2.6654	1	0.00826258	1
Gm7312	-6.75197e-17	0.17725	0.0663531	0.0665038	-1.01758e-15	2.66526	1	0.0082659	1
Serac1	-8.3392e-17	0.177167	0.0663541	0.0665048	-1.25677e-15	2.66398	1	0.00829645	1
Gale	2.51741e-16	0.17713	0.0663546	0.0665052	3.79387e-15	2.6634	1	0.00831032	1
Dctn4	6.50355e-17	0.17709	0.0663551	0.0665057	9.80113e-16	2.66278	1	0.0083252	1
Gm12586	-7.49942e-17	0.177037	0.0663557	0.0665064	-1.13019e-15	2.66196	1	0.00834484	1
Rdh9	2.21865e-16	0.177029	0.0663558	0.0665065	3.34357e-15	2.66182	1	0.00834803	1
Ppp1r12c	2.7691e-17	0.176968	0.0663566	0.0665072	4.17306e-16	2.66088	1	0.00837076	1
Tcea2	2.96544e-16	0.176918	0.0663572	0.0665078	4.4689e-15	2.66011	1	0.00838921	1
4732471J01Rik	2.39541e-17	0.176875	0.0663577	0.0665083	3.60985e-16	2.65943	1	0.00840558	1
Palmd	-5.32425e-16	0.176848	0.066358	0.0665087	-8.02353e-15	2.65902	1	0.00841561	1
Aicda	-1.77688e-16	0.17681	0.0663585	0.0665091	-2.6777e-15	2.65843	1	0.00843	1
Ptges2	2.02177e-17	0.176796	0.0663586	0.0665093	3.04673e-16	2.65822	1	0.00843495	1
Slc16a6	1.46162e-17	0.176784	0.0663588	0.0665094	2.20261e-16	2.65803	1	0.00843957	1
Adam23	5.009e-17	0.176782	0.0663588	0.0665095	7.54835e-16	2.658	1	0.00844035	1
Gm17191	1.02367e-16	0.176776	0.0663589	0.0665095	1.54263e-15	2.65791	1	0.00844256	1
Lonp2	-1.08612e-16	0.176659	0.0663603	0.0665109	-1.63671e-15	2.6561	1	0.00848657	1
Dxo	-1.06748e-16	0.17657	0.0663614	0.066512	-1.60858e-15	2.6547	1	0.00852062	1
Med12	2.81597e-16	0.176567	0.0663614	0.0665121	4.24338e-15	2.65466	1	0.00852166	1
Crkl	1.27421e-17	0.176548	0.0663616	0.0665123	1.92011e-16	2.65437	1	0.00852874	1
Ak9	3.56277e-16	0.17651	0.0663621	0.0665128	5.36868e-15	2.65377	1	0.00854331	1
Onecut1	3.41998e-16	-0.176474	0.0663625	0.0665132	5.15348e-15	-2.65322	1	0.00855683	1
Eif4g2	3.18935e-16	0.176468	0.0663626	0.0665133	4.80594e-15	2.65313	1	0.00855924	1
Gm6787	-1.29158e-16	0.176392	0.0663635	0.0665142	-1.94622e-15	2.65194	1	0.00858827	1
Ntrk3	1.09824e-16	0.176391	0.0663635	0.0665142	1.65488e-15	2.65193	1	0.00858871	1
Ptpn1	-6.94125e-17	0.176388	0.0663636	0.0665142	-1.04594e-15	2.65188	1	0.00858986	1
Dscaml1	1.09824e-16	0.176387	0.0663636	0.0665142	1.65488e-15	2.65187	1	0.00859019	1
Abl1	3.33868e-16	0.176365	0.0663639	0.0665145	5.03087e-15	2.65153	1	0.0085985	1
Zfp763	-2.50404e-15	0.176314	0.0663645	0.0665151	-3.77316e-14	2.65074	1	0.00861796	1
Gm12926	-6.8709e-18	0.176244	0.0663653	0.066516	-1.03531e-16	2.64965	1	0.00864503	1
Gm15491	-1.71396e-17	0.176243	0.0663653	0.066516	-2.58262e-16	2.64964	1	0.00864529	1
Kcnk3	7.68855e-17	-0.176227	0.0663655	0.0665162	1.15852e-15	-2.64938	1	0.00865161	1
Gabrb3	-9.67307e-18	0.17619	0.066366	0.0665166	-1.45753e-16	2.64881	1	0.00866569	1
Trps1	5.13098e-16	0.176169	0.0663662	0.0665169	7.73131e-15	2.64849	1	0.0086737	1
Gm14659	-1.7142e-17	0.176163	0.0663663	0.0665169	-2.58294e-16	2.6484	1	0.00867605	1
A730098A19Rik	-4.70153e-17	0.176145	0.0663665	0.0665172	-7.08419e-16	2.64811	1	0.00868327	1
Gabra5	7.99432e-17	0.176131	0.0663667	0.0665173	1.20457e-15	2.6479	1	0.0086884	1
Lrrfip1	6.50045e-17	0.176051	0.0663676	0.0665183	9.7946e-16	2.64666	1	0.00871926	1
Gm24975	1.34084e-16	0.176006	0.0663682	0.0665188	2.0203e-15	2.64596	1	0.00873683	1
Gm25100	1.34084e-16	0.176006	0.0663682	0.0665188	2.0203e-15	2.64596	1	0.00873683	1
Gm26463	1.34084e-16	0.176006	0.0663682	0.0665188	2.0203e-15	2.64596	1	0.00873683	1
Gm28019	1.34084e-16	0.176006	0.0663682	0.0665188	2.0203e-15	2.64596	1	0.00873683	1
Fxyd1	-6.94241e-17	0.175998	0.0663683	0.0665189	-1.04604e-15	2.64584	1	0.0087399	1
Rnf8	-2.293e-16	-0.175906	0.0663694	0.0665201	-3.4549e-15	-2.6444	1	0.00877581	1
Iqgap2	-5.77263e-16	0.175901	0.0663695	0.0665201	-8.69771e-15	2.64432	1	0.00877786	1
Vav3	-1.35945e-16	-0.17583	0.0663703	0.066521	-2.04829e-15	-2.64323	1	0.00880545	1
Gm26551	-2.93476e-16	0.175772	0.066371	0.0665217	-4.42175e-15	2.64233	1	0.00882805	1
Xrcc6	-1.51581e-16	0.175764	0.0663711	0.0665218	-2.28384e-15	2.6422	1	0.00883122	1
Mapkap1	1.09804e-16	0.175727	0.0663715	0.0665222	1.65438e-15	2.64163	1	0.00884564	1
Gm26330	-2.37467e-16	0.175711	0.0663717	0.0665224	-3.57783e-15	2.64138	1	0.00885197	1
Snord37	-9.18395e-17	0.175634	0.0663727	0.0665233	-1.3837e-15	2.64019	1	0.00888224	1
Bri3bp	-9.48628e-17	-0.175571	0.0663734	0.0665241	-1.42923e-15	-2.63921	1	0.00890711	1
Zfp146	6.01048e-17	-0.175468	0.0663747	0.0665253	9.05538e-16	-2.63761	1	0.00894791	1
Cadps2	-1.81463e-16	0.175463	0.0663747	0.0665254	-2.73391e-15	2.63754	1	0.00894969	1
Gm12996	-3.14023e-16	0.17545	0.0663749	0.0665256	-4.73105e-15	2.63733	1	0.00895499	1
Mfap3	1.7164e-17	-0.175428	0.0663751	0.0665258	2.58591e-16	-2.63699	1	0.0089637	1
Gm26529	-1.73996e-16	0.175425	0.0663752	0.0665259	-2.6214e-15	2.63694	1	0.00896499	1
Gm29480	-2.46328e-17	0.175407	0.0663754	0.0665261	-3.71113e-16	2.63667	1	0.00897209	1
Cyp4x1	5.09816e-17	0.17538	0.0663757	0.0665264	7.68076e-16	2.63625	1	0.0089828	1
Gm3244	2.46338e-17	-0.175374	0.0663758	0.0665265	3.71126e-16	-2.63615	1	0.00898517	1
Gm13410	8.8114e-17	-0.175347	0.0663761	0.0665268	1.3275e-15	-2.63574	1	0.0089959	1
4930523C07Rik	-5.96592e-18	0.175288	0.0663768	0.0665275	-8.98796e-17	2.63483	1	0.00901931	1
Scfd2	-2.5615e-16	0.175287	0.0663768	0.0665275	-3.85902e-15	2.6348	1	0.00901992	1
Cpeb1	1.27043e-17	0.175283	0.0663769	0.0665276	1.91397e-16	2.63474	1	0.00902148	1
Gm10814	-7.31799e-17	0.175272	0.066377	0.0665277	-1.10249e-15	2.63458	1	0.00902573	1
Gm12645	1.96606e-16	0.175214	0.0663777	0.0665284	2.96193e-15	2.63368	1	0.00904896	1
Moxd1	9.55862e-17	-0.175214	0.0663777	0.0665284	1.44003e-15	-2.63367	1	0.00904905	1
Prepl	-3.38302e-16	0.175187	0.066378	0.0665287	-5.0966e-15	2.63325	1	0.0090599	1
Dek	4.16722e-16	-0.17506	0.0663796	0.0665303	6.27787e-15	-2.63128	1	0.00911097	1
Gm23668	-3.34573e-16	0.175028	0.0663799	0.0665306	-5.04027e-15	2.63078	1	0.00912394	1
Chuk	1.5459e-16	0.174971	0.0663806	0.0665313	2.32885e-15	2.62991	1	0.00914663	1
Gm20642	1.69525e-16	0.174926	0.0663812	0.0665319	2.55381e-15	2.6292	1	0.0091651	1
Gm10010	-1.70279e-16	0.174824	0.0663824	0.0665331	-2.56513e-15	2.62762	1	0.00920637	1
Brip1os	-7.69276e-17	0.174818	0.0663825	0.0665332	-1.15885e-15	2.62753	1	0.00920883	1
Gm13197	-1.8055e-16	0.174764	0.0663831	0.0665338	-2.71982e-15	2.6267	1	0.00923074	1
Lactb2	-1.86618e-16	0.174748	0.0663833	0.066534	-2.81123e-15	2.62644	1	0.00923748	1
Cdh22	-2.31897e-16	0.174659	0.0663844	0.0665351	-3.49324e-15	2.62507	1	0.00927345	1
Doc2g	-2.07626e-16	0.174639	0.0663846	0.0665353	-3.12762e-15	2.62476	1	0.00928169	1
Tmem45a2	2.0963e-15	0.174598	0.0663851	0.0665358	3.15779e-14	2.62412	1	0.00929872	1
Ap2s1	8.73619e-17	0.174475	0.0663866	0.0665373	1.31596e-15	2.62222	1	0.00934916	1
Gm266	-1.21747e-16	0.174453	0.0663868	0.0665375	-1.83391e-15	2.62187	1	0.00935839	1
Coq9	-1.59088e-16	0.174449	0.0663869	0.0665376	-2.39638e-15	2.62182	1	0.00935978	1
Il1f9	-3.21297e-17	0.174444	0.0663869	0.0665376	-4.83977e-16	2.62174	1	0.00936194	1
1810059C17Rik	-4.52005e-17	0.174393	0.0663875	0.0665382	-6.80859e-16	2.62095	1	0.00938286	1
Ern1	1.28432e-16	0.174306	0.0663886	0.0665393	1.93455e-15	2.6196	1	0.00941891	1
Ssr4	-3.96027e-17	0.174282	0.0663889	0.0665396	-5.96527e-16	2.61922	1	0.00942914	1
Uprt	5.00118e-17	0.174166	0.0663902	0.066541	7.53301e-16	2.61743	1	0.0094771	1
Mcph1	6.8682e-17	0.174158	0.0663903	0.0665411	1.03452e-15	2.6173	1	0.00948061	1
Popdc3	2.76065e-17	0.17414	0.0663906	0.0665413	4.1582e-16	2.61702	1	0.00948821	1
Ccdc101	-4.70757e-17	0.174121	0.0663908	0.0665415	-7.0907e-16	2.61672	1	0.00949623	1
Lztfl1	2.1431e-16	0.174099	0.066391	0.0665418	3.22799e-15	2.61639	1	0.00950521	1
Ppp4r4	1.47095e-16	0.174061	0.0663915	0.0665422	2.21557e-15	2.6158	1	0.00952113	1
Lhx5	-1.28424e-16	-0.174034	0.0663918	0.0665425	-1.93433e-15	-2.61537	1	0.00953264	1
Dcaf11	1.17221e-16	0.174005	0.0663922	0.0665429	1.76558e-15	2.61494	1	0.00954447	1
Slc15a4	-3.23402e-16	0.173987	0.0663924	0.0665431	-4.87107e-15	2.61464	1	0.00955238	1
Lcmt1	-6.81874e-16	0.173981	0.0663924	0.0665432	-1.02704e-14	2.61457	1	0.00955451	1
Gm14027	3.16993e-16	0.173972	0.0663926	0.0665433	4.77453e-15	2.61442	1	0.00955841	1
Taf6	2.74051e-16	0.173956	0.0663927	0.0665435	4.12772e-15	2.61418	1	0.00956509	1
Zcchc9	-2.46775e-17	0.173912	0.0663933	0.066544	-3.71686e-16	2.61348	1	0.00958387	1
Ninl	-3.68214e-16	0.173879	0.0663937	0.0665444	-5.54592e-15	2.61297	1	0.00959772	1
Atp4a	2.79649e-16	0.173879	0.0663937	0.0665444	4.21199e-15	2.61297	1	0.00959783	1
Sbno2	1.35885e-16	0.173801	0.0663946	0.0665453	2.04663e-15	2.61177	1	0.00963061	1
Ttc39b	5.74687e-17	0.17379	0.0663947	0.0665455	8.65562e-16	2.6116	1	0.00963525	1
Jakmip2	1.26589e-17	0.17376	0.0663951	0.0665458	1.90659e-16	2.61114	1	0.00964784	1
Rnft1	-3.96186e-17	0.17375	0.0663952	0.0665459	-5.96709e-16	2.61099	1	0.00965198	1
Ptchd1	3.58866e-17	-0.173681	0.066396	0.0665467	5.40493e-16	-2.60991	1	0.0096814	1
Myeov2	-6.66947e-16	0.17367	0.0663962	0.0665469	-1.0045e-14	2.60974	1	0.00968618	1
Tbc1d30	3.83157e-16	-0.173662	0.0663962	0.066547	5.77076e-15	-2.60961	1	0.00968958	1
Olfml2b	-5.8292e-17	0.17365	0.0663964	0.0665471	-8.7794e-16	2.60943	1	0.00969473	1
Dclk1	1.69485e-16	0.173594	0.0663971	0.0665478	2.5526e-15	2.60856	1	0.00971856	1
Gm25749	5.74621e-17	0.173569	0.0663974	0.0665481	8.65428e-16	2.60817	1	0.00972932	1
Gper1	6.21295e-17	0.173561	0.0663974	0.0665482	9.35721e-16	2.60805	1	0.00973257	1
1700044C05Rik	-6.57637e-17	0.173532	0.0663978	0.0665485	-9.90451e-16	2.6076	1	0.00974488	1
Gm11713	2.07661e-16	-0.173466	0.0663986	0.0665493	3.12749e-15	-2.60657	1	0.00977341	1
Gosr1	-6.11921e-17	-0.17343	0.066399	0.0665497	-9.21581e-16	-2.60602	1	0.00978862	1
2010204K13Rik	9.19073e-17	-0.173367	0.0663998	0.0665505	1.38415e-15	-2.60504	1	0.00981592	1
Gm9027	1.07864e-16	0.173276	0.0664008	0.0665516	1.62443e-15	2.60363	1	0.00985497	1
Ap1s2	-4.45795e-16	-0.173185	0.0664019	0.0665527	-6.71359e-15	-2.60223	1	0.0098943	1
Vwa3b	5.83076e-17	-0.173128	0.0664026	0.0665533	8.78093e-16	-2.60135	1	0.00991887	1
Crmp1	2.29215e-16	0.173077	0.0664032	0.0665539	3.45187e-15	2.60055	1	0.00994139	1
Braf	1.39597e-16	0.17307	0.0664033	0.066554	2.10226e-15	2.60044	1	0.00994431	1
CAVID2B1	2.53486e-16	0.17305	0.0664035	0.0665543	3.81736e-15	2.60013	1	0.00995301	1
Rhpn2	3.13079e-17	0.173045	0.0664036	0.0665543	4.71479e-16	2.60006	1	0.00995497	1
Gm23734	-1.32992e-16	0.173042	0.0664036	0.0665543	-2.00278e-15	2.60002	1	0.00995623	1
Cd68	-7.8848e-17	0.173031	0.0664037	0.0665545	-1.1874e-15	2.59984	1	0.00996116	1
Gm15286	-4.71083e-17	0.17303	0.0664037	0.0665545	-7.09422e-16	2.59983	1	0.0099616	1
Soga3	1.65733e-16	0.172971	0.0664044	0.0665552	2.49581e-15	2.59891	1	0.00998744	1
B130034C11Rik	2.75709e-17	0.172946	0.0664047	0.0665555	4.15194e-16	2.59853	1	0.00999816	1
Wdr13	1.0972e-16	0.172936	0.0664049	0.0665556	1.65229e-15	2.59837	1	0.0100028	1
Psmd14	1.43164e-18	0.172925	0.066405	0.0665557	2.15593e-17	2.5982	1	0.0100076	1
Dnajc10	-1.18059e-16	0.172924	0.066405	0.0665557	-1.77786e-15	2.59818	1	0.0100079	1
Gm15348	-2.26348e-16	0.172916	0.0664051	0.0665558	-3.40859e-15	2.59806	1	0.0100114	1
Cggbp1	8.89951e-18	0.172915	0.0664051	0.0665559	1.34018e-16	2.59804	1	0.010012	1
Gm24816	6.09835e-18	0.172895	0.0664053	0.0665561	9.18352e-17	2.59773	1	0.0100207	1
Mfsd7a	7.23782e-17	0.172889	0.0664054	0.0665562	1.08994e-15	2.59763	1	0.0100235	1
Klhl7	9.47821e-17	0.17287	0.0664056	0.0665564	1.42732e-15	2.59734	1	0.0100317	1
Ccdc30	-2.28426e-17	0.172834	0.0664061	0.0665568	-3.43984e-16	2.59679	1	0.0100475	1
Art3	9.76022e-16	0.172736	0.0664072	0.066558	1.46975e-14	2.59527	1	0.0100905	1
Gm25994	-2.0395e-16	0.172704	0.0664076	0.0665584	-3.07118e-15	2.59478	1	0.0101045	1
Prpsap1	-6.2055e-17	0.172682	0.0664079	0.0665586	-9.34453e-16	2.59444	1	0.0101143	1
Pou2f2	9.47764e-17	0.172678	0.0664079	0.0665587	1.42718e-15	2.59437	1	0.0101162	1
Gm10181	-9.9396e-17	0.172677	0.0664079	0.0665587	-1.49675e-15	2.59435	1	0.0101168	1
Stk24	1.85281e-16	-0.172658	0.0664082	0.0665589	2.79003e-15	-2.59406	1	0.0101251	1
Tmem70	1.24648e-16	0.172656	0.0664082	0.0665589	1.877e-15	2.59404	1	0.0101258	1
St3gal1	2.56229e-16	-0.17262	0.0664086	0.0665593	3.85838e-15	-2.59348	1	0.0101416	1
Pi4k2b	-2.11422e-16	0.172577	0.0664091	0.0665599	-3.18362e-15	2.5928	1	0.0101611	1
Harbi1	-3.96555e-17	0.172516	0.0664098	0.0665606	-5.97133e-16	2.59187	1	0.0101877	1
Dlx1as	-3.0388e-16	-0.172516	0.0664098	0.0665606	-4.57583e-15	-2.59186	1	0.0101881	1
Rnps1	2.14261e-16	0.172468	0.0664104	0.0665612	3.22631e-15	2.59112	1	0.0102092	1
Ajuba	4.99604e-17	0.172446	0.0664106	0.0665614	7.52296e-16	2.59078	1	0.010219	1
Gm22710	-4.7126e-17	0.172439	0.0664107	0.0665615	-7.09614e-16	2.59067	1	0.0102223	1
Gm28437	9.9404e-17	-0.172411	0.0664111	0.0665618	1.4968e-15	-2.59024	1	0.0102346	1
Mir686	2.59067e-16	0.172388	0.0664113	0.0665621	3.90095e-15	2.58988	1	0.0102451	1
Tmem219	1.46891e-15	0.172385	0.0664114	0.0665621	2.21184e-14	2.58984	1	0.0102462	1
Dlgap2	-4.51799e-19	0.172376	0.0664115	0.0665622	-6.80302e-18	2.58969	1	0.0102504	1
Spock1	-3.30918e-16	0.172376	0.0664115	0.0665622	-4.98285e-15	2.58969	1	0.0102505	1
Gm16386	1.13437e-16	0.172357	0.0664117	0.0665625	1.70809e-15	2.58941	1	0.0102586	1
Ndst1	4.24896e-17	0.172356	0.0664117	0.0665625	6.3979e-16	2.58939	1	0.0102593	1
Dlg5	-4.42943e-16	0.172295	0.0664124	0.0665632	-6.66958e-15	2.58845	1	0.0102864	1
Gm11613	-9.94092e-17	0.172237	0.0664131	0.0665639	-1.49683e-15	2.58754	1	0.0103127	1
Zadh2	-1.86246e-16	-0.172156	0.0664141	0.0665648	-2.80431e-15	-2.58629	1	0.0103491	1
Ccdc78	-2.4732e-17	0.172086	0.0664149	0.0665657	-3.72386e-16	2.5852	1	0.0103808	1
Gm12905	1.18511e-15	0.172053	0.0664153	0.0665661	1.78439e-14	2.5847	1	0.0103956	1
Col4a2	1.32098e-16	0.172044	0.0664154	0.0665662	1.98897e-15	2.58456	1	0.0103996	1
Ube4a	-2.47347e-17	0.171996	0.066416	0.0665667	-3.72421e-16	2.58382	1	0.0104214	1
Olfm2	-4.60693e-16	-0.171891	0.0664172	0.066568	-6.93635e-15	-2.58219	1	0.010469	1
A730049H05Rik	-3.94413e-16	0.171868	0.0664175	0.0665682	-5.93839e-15	2.58182	1	0.0104799	1
Shroom1	5.7411e-17	0.171857	0.0664176	0.0665684	8.64395e-16	2.58166	1	0.0104846	1
4933424M12Rik	-1.72707e-17	0.171857	0.0664176	0.0665684	-2.60032e-16	2.58166	1	0.0104847	1
9530026P05Rik	-3.96762e-17	0.171822	0.066418	0.0665688	-5.97371e-16	2.58113	1	0.0105005	1
Tmem11	3.50044e-17	0.171787	0.0664184	0.0665692	5.27029e-16	2.58058	1	0.0105165	1
Grik5	1.25978e-15	0.171698	0.0664195	0.0665702	1.89671e-14	2.5792	1	0.0105573	1
Gm11884	-1.96512e-16	0.171696	0.0664195	0.0665703	-2.95864e-15	2.57916	1	0.0105585	1
Gm4312	2.04902e-16	0.171685	0.0664196	0.0665704	3.08497e-15	2.579	1	0.0105632	1
Cecr2	7.14086e-17	0.171683	0.0664196	0.0665704	1.07511e-15	2.57896	1	0.0105644	1
Ldb3	-3.006e-16	0.171677	0.0664197	0.0665705	-4.52576e-15	2.57888	1	0.0105669	1
Eif5b	1.0968e-16	0.171584	0.0664208	0.0665716	1.65129e-15	2.57743	1	0.01061	1
Limk2	-9.56969e-17	0.171506	0.0664217	0.0665725	-1.44075e-15	2.57623	1	0.0106459	1
5430427O19Rik	-2.84892e-17	0.171314	0.066424	0.0665748	-4.28899e-16	2.57326	1	0.0107349	1
MMERVK10C	-5.17929e-17	-0.171289	0.0664243	0.0665751	-7.79729e-16	-2.57287	1	0.0107467	1
Osbpl2	-1.99289e-16	-0.171285	0.0664243	0.0665751	-3.00024e-15	-2.57281	1	0.0107485	1
Slc12a5	1.2931e-16	-0.171283	0.0664243	0.0665751	1.94673e-15	-2.57277	1	0.0107494	1
Arid1b	-2.35278e-18	0.17124	0.0664248	0.0665756	-3.54202e-17	2.57211	1	0.0107696	1
Gm15965	-2.47585e-17	0.171201	0.0664253	0.0665761	-3.72726e-16	2.5715	1	0.0107878	1
Rnf144b	-4.15863e-16	-0.171197	0.0664253	0.0665761	-6.26061e-15	-2.57145	1	0.0107894	1
Mndal	-2.63741e-16	0.171159	0.0664258	0.0665766	-3.97046e-15	2.57086	1	0.0108072	1
Gm23910	-2.00262e-16	0.171144	0.066426	0.0665768	-3.01482e-15	2.57062	1	0.0108145	1
4930430F08Rik	1.09666e-16	0.171118	0.0664263	0.0665771	1.65095e-15	2.57023	1	0.0108263	1
Kcnmb2	-1.76879e-16	-0.171102	0.0664265	0.0665773	-2.66278e-15	-2.56997	1	0.0108341	1
Ccna2	1.51721e-16	-0.171064	0.0664269	0.0665777	2.28404e-15	-2.56939	1	0.0108519	1
Clint1	1.05929e-16	0.171032	0.0664273	0.0665781	1.59467e-15	2.56889	1	0.0108669	1
Mir1188	2.30686e-18	0.170973	0.066428	0.0665788	3.47273e-17	2.56798	1	0.0108946	1
Stau2	1.14383e-16	-0.170969	0.066428	0.0665788	1.72192e-15	-2.56792	1	0.0108967	1
Dennd2c	7.04521e-17	0.170912	0.0664287	0.0665795	1.06057e-15	2.56703	1	0.0109238	1
Calb1	3.97036e-17	-0.170905	0.0664288	0.0665796	5.97687e-16	-2.56693	1	0.0109268	1
Slc13a1	2.26437e-16	0.170897	0.0664288	0.0665797	3.40872e-15	2.56681	1	0.0109305	1
Nfat5	-2.36588e-18	0.170801	0.06643	0.0665808	-3.56147e-17	2.56532	1	0.0109761	1
Nrxn1	3.5337e-16	-0.17079	0.0664301	0.0665809	5.31943e-15	-2.56515	1	0.0109814	1
Ints1	1.84338e-16	0.170779	0.0664302	0.066581	2.77491e-15	2.56497	1	0.0109868	1
Gm609	-6.21127e-17	0.170753	0.0664305	0.0665813	-9.35002e-16	2.56458	1	0.0109988	1
Mir453	-3.97153e-17	0.170515	0.0664333	0.0665841	-5.97822e-16	2.5609	1	0.0111125	1
Tenm1	8.45253e-17	-0.170482	0.0664337	0.0665845	1.27233e-15	-2.56038	1	0.0111286	1
Sh3gl1	5.73695e-17	0.170467	0.0664339	0.0665847	8.63558e-16	2.56015	1	0.0111358	1
Gm4128	-1.87215e-16	0.17041	0.0664345	0.0665854	-2.81803e-15	2.55927	1	0.0111631	1
Rpl36al	-4.71867e-17	0.170405	0.0664346	0.0665854	-7.10273e-16	2.5592	1	0.0111655	1
Ccdc28a	-9.94642e-17	0.170394	0.0664347	0.0665855	-1.49717e-15	2.55903	1	0.0111709	1
Gm26799	7.23026e-17	0.17036	0.0664351	0.0665859	1.08832e-15	2.5585	1	0.0111871	1
Cacna1a	-3.78535e-17	0.170339	0.0664354	0.0665862	-5.69779e-16	2.55818	1	0.0111973	1
Dolpp1	5.42795e-16	0.170302	0.0664358	0.0665866	8.17023e-15	2.5576	1	0.0112154	1
Taf1a	-1.21872e-16	0.170288	0.066436	0.0665868	-1.83443e-15	2.55739	1	0.011222	1
1810030O07Rik	1.09641e-16	0.170278	0.0664361	0.0665869	1.65032e-15	2.55723	1	0.0112268	1
Ank2	6.24944e-16	0.170255	0.0664363	0.0665872	9.40666e-15	2.55687	1	0.0112384	1
Eif2b1	-9.94708e-17	0.170174	0.0664373	0.0665881	-1.49721e-15	2.55561	1	0.0112777	1
Gm29455	-6.2131e-17	0.170138	0.0664377	0.0665885	-9.35177e-16	2.55507	1	0.0112949	1
Gm13965	-3.53391e-16	0.170092	0.0664382	0.0665891	-5.31909e-15	2.55435	1	0.0113173	1
Gm15472	2.88045e-16	-0.170073	0.0664385	0.0665893	4.33552e-15	-2.55406	1	0.0113267	1
Zfp706	5.73574e-17	0.170063	0.0664386	0.0665894	8.63315e-16	2.5539	1	0.0113318	1
Med20	-1.79059e-16	0.169984	0.0664395	0.0665903	-2.69507e-15	2.55268	1	0.0113702	1
Ankrd1	1.82445e-16	0.169919	0.0664403	0.0665911	2.746e-15	2.55168	1	0.0114021	1
Gm25337	-8.0808e-17	0.169919	0.0664403	0.0665911	-1.21625e-15	2.55167	1	0.0114022	1
Fsd1	9.46939e-17	0.169918	0.0664403	0.0665911	1.42525e-15	2.55167	1	0.0114024	1
Gm10801	-1.17098e-16	-0.169897	0.0664405	0.0665913	-1.76245e-15	-2.55133	1	0.011413	1
C230004F18Rik	5.0744e-18	0.169868	0.0664408	0.0665917	7.63748e-17	2.55089	1	0.0114273	1
Ngdn	1.91778e-16	0.16984	0.0664412	0.066592	2.88643e-15	2.55045	1	0.0114412	1
Gm11581	-1.21886e-16	0.169811	0.0664415	0.0665923	-1.83449e-15	2.55001	1	0.011455	1
Mpped2	1.7684e-16	0.169785	0.0664418	0.0665926	2.66157e-15	2.54961	1	0.0114678	1
Gm23632	5.57716e-16	0.169777	0.0664419	0.0665927	8.39404e-15	2.54947	1	0.0114722	1
Gm28578	3.1207e-17	0.169667	0.0664432	0.066594	4.69679e-16	2.54778	1	0.0115264	1
Memo1	-1.74172e-16	0.169534	0.0664447	0.0665956	-2.6213e-15	2.54572	1	0.0115928	1
Pmepa1os	-2.28002e-17	-0.169495	0.0664452	0.066596	-3.43143e-16	-2.54512	1	0.011612	1
Sft2d3	1.02148e-16	0.169454	0.0664456	0.0665965	1.53732e-15	2.54449	1	0.0116323	1
Mmp17	-1.36835e-16	0.169397	0.0664463	0.0665972	-2.05933e-15	2.5436	1	0.011661	1
Pcdha9	2.93668e-16	-0.169327	0.0664471	0.066598	4.41958e-15	-2.54253	1	0.0116959	1
Cnga3	1.54421e-16	0.169319	0.0664472	0.0665981	2.32397e-15	2.5424	1	0.0117002	1
Dctn5	6.48026e-17	0.169293	0.0664475	0.0665984	9.75245e-16	2.542	1	0.0117131	1
Prkag2	-6.96253e-17	0.169263	0.0664479	0.0665987	-1.04782e-15	2.54154	1	0.0117282	1
Ssxb2	-6.3091e-17	0.169255	0.066448	0.0665988	-9.49479e-16	2.5414	1	0.0117325	1
Rps27l	-9.57644e-17	0.169247	0.0664481	0.0665989	-1.44119e-15	2.54129	1	0.0117364	1
Il18	2.04055e-16	-0.169175	0.0664489	0.0665997	3.07086e-15	-2.54018	1	0.0117725	1
Far2os2	2.88842e-16	0.16912	0.0664495	0.0666004	4.3468e-15	2.53933	1	0.0118002	1
3830408C21Rik	5.73291e-17	0.169115	0.0664496	0.0666004	8.62746e-16	2.53924	1	0.0118032	1
Prss35	1.99223e-16	0.169082	0.06645	0.0666008	2.9981e-15	2.53874	1	0.0118196	1
A530013C23Rik	-2.41399e-16	0.16907	0.0664501	0.0666009	-3.63279e-15	2.53855	1	0.0118258	1
Gmps	-8.72002e-17	-0.169062	0.0664502	0.066601	-1.31226e-15	-2.53843	1	0.0118299	1
Gm28875	-2.93677e-16	0.169037	0.0664505	0.0666013	-4.41949e-15	2.53805	1	0.0118424	1
Zfp53	-6.58985e-17	0.169021	0.0664507	0.0666015	-9.91691e-16	2.53779	1	0.0118508	1
2900052L18Rik	1.39475e-16	0.168975	0.0664512	0.066602	2.09891e-15	2.53709	1	0.0118739	1
H1f0	-2.10422e-16	-0.168971	0.0664512	0.0666021	-3.16657e-15	-2.53703	1	0.0118759	1
Gm11748	-8.55043e-17	0.16896	0.0664514	0.0666022	-1.28672e-15	2.53685	1	0.0118819	1
Gm27444	-1.13334e-16	-0.168902	0.066452	0.0666029	-1.7055e-15	-2.53595	1	0.0119114	1
Cacnb3	-9.89133e-18	0.168884	0.0664523	0.0666031	-1.48849e-16	2.53567	1	0.0119206	1
Gm6963	-1.12579e-16	0.168875	0.0664524	0.0666032	-1.69413e-15	2.53554	1	0.011925	1
Npdc1	6.47871e-17	0.168774	0.0664535	0.0666044	9.74923e-16	2.53398	1	0.0119766	1
Gls	-1.77929e-16	0.168762	0.0664537	0.0666045	-2.67749e-15	2.5338	1	0.0119827	1
Ppapdc2	1.39466e-16	0.168671	0.0664547	0.0666056	2.09866e-15	2.53238	1	0.0120297	1
Gm16712	-1.14453e-16	0.168641	0.0664551	0.0666059	-1.72226e-15	2.53192	1	0.012045	1
Snx9	-9.95172e-17	0.16862	0.0664553	0.0666062	-1.49751e-15	2.5316	1	0.0120557	1
Gm22533	-1.29391e-16	0.168577	0.0664558	0.0666067	-1.94703e-15	2.53094	1	0.012078	1
Gm14022	-1.66733e-16	0.168543	0.0664562	0.066607	-2.50892e-15	2.53042	1	0.0120954	1
Mzf1	1.1519e-16	0.168536	0.0664563	0.0666071	1.73332e-15	2.53031	1	0.0120991	1
Heatr6	5.54443e-17	0.168522	0.0664564	0.0666073	8.34296e-16	2.53008	1	0.0121067	1
Chrna10	-2.11543e-16	0.168504	0.0664566	0.0666075	-3.18318e-15	2.5298	1	0.0121161	1
C2cd4c	1.61865e-16	0.168491	0.0664568	0.0666077	2.43564e-15	2.5296	1	0.0121228	1
Gm3695	-2.11093e-17	0.168356	0.0664583	0.0666092	-3.17633e-16	2.52752	1	0.0121926	1
Ssh3	7.22425e-17	0.168348	0.0664584	0.0666093	1.08703e-15	2.52739	1	0.0121971	1
Sfxn4	1.24969e-17	0.168337	0.0664586	0.0666094	1.8804e-16	2.52723	1	0.0122024	1
4930545L23Rik	7.0841e-17	0.168307	0.0664589	0.0666098	1.06594e-15	2.52676	1	0.0122183	1
n-R5s41	8.15757e-17	0.168279	0.0664592	0.0666101	1.22745e-15	2.52632	1	0.0122332	1
4933417D19Rik	-4.29995e-16	0.168226	0.0664598	0.0666107	-6.47001e-15	2.52552	1	0.0122604	1
Sdad1	-2.63829e-16	0.168212	0.06646	0.0666109	-3.96974e-15	2.5253	1	0.0122678	1
Gm15766	4.51602e-17	0.168005	0.0664624	0.0666132	6.79485e-16	2.5221	1	0.0123766	1
Zfp882	-3.03743e-16	-0.167919	0.0664634	0.0666142	-4.57008e-15	-2.52076	1	0.0124225	1
Mt3	-8.2735e-17	0.167911	0.0664635	0.0666143	-1.24482e-15	2.52064	1	0.0124266	1
Plxna3	3.08649e-16	-0.167861	0.066464	0.0666149	4.64384e-15	-2.51987	1	0.0124531	1
Rpl7a-ps8	-2.35493e-15	0.167832	0.0664644	0.0666153	-3.54314e-14	2.51942	1	0.0124687	1
Gm11494	4.88575e-16	0.167763	0.0664652	0.066616	7.35085e-15	2.51836	1	0.0125051	1
Cngb1	-3.79309e-17	0.167747	0.0664653	0.0666162	-5.70687e-16	2.51811	1	0.0125137	1
Ier3ip1	3.37344e-16	0.167733	0.0664655	0.0666164	5.07548e-15	2.51789	1	0.0125214	1
Gm3052	-2.48632e-17	0.167693	0.066466	0.0666168	-3.74075e-16	2.51728	1	0.0125424	1
Nvl	-1.51823e-16	0.167675	0.0664662	0.066617	-2.28421e-15	2.51701	1	0.0125519	1
Dqx1	1.9918e-16	0.167628	0.0664667	0.0666176	2.99669e-15	2.51627	1	0.0125775	1
Gm25442	1.65571e-16	0.167551	0.0664676	0.0666185	2.491e-15	2.51508	1	0.0126188	1
Slc44a4	1.6557e-16	0.167536	0.0664678	0.0666186	2.49099e-15	2.51485	1	0.0126266	1
Frmd6	1.50634e-16	0.167535	0.0664678	0.0666187	2.26627e-15	2.51483	1	0.0126273	1
Gm23576	4.51454e-17	0.16751	0.0664681	0.0666189	6.79204e-16	2.51445	1	0.0126406	1
Mllt10	-8.46144e-17	0.167498	0.0664682	0.0666191	-1.27301e-15	2.51427	1	0.012647	1
Slc43a3	-3.68406e-16	0.167451	0.0664687	0.0666196	-5.54255e-15	2.51353	1	0.0126725	1
Plekha8	-4.35413e-17	0.167437	0.0664689	0.0666198	-6.55063e-16	2.51332	1	0.0126799	1
Tspan13	-1.55565e-16	0.167385	0.0664695	0.0666204	-2.3404e-15	2.51252	1	0.0127079	1
Cntn5	4.95367e-16	-0.167383	0.0664695	0.0666204	7.45255e-15	-2.51249	1	0.0127089	1
Kif3b	2.73851e-16	0.16726	0.0664709	0.0666218	4.11986e-15	2.51059	1	0.0127756	1
Ikbke	1.24647e-17	0.167259	0.0664709	0.0666218	1.8752e-16	2.51058	1	0.012776	1
Rasal1	6.02449e-16	0.16723	0.0664713	0.0666222	9.0633e-15	2.51012	1	0.012792	1
Sec11c	-1.44368e-16	0.167212	0.0664715	0.0666224	-2.17188e-15	2.50985	1	0.0128014	1
Spef2	-8.08919e-17	0.16711	0.0664726	0.0666235	-1.21692e-15	2.50827	1	0.0128574	1
Nrcam	1.31951e-16	0.167106	0.0664727	0.0666236	1.98504e-15	2.50822	1	0.0128592	1
Ctnnal1	8.83602e-17	-0.167106	0.0664727	0.0666236	1.32927e-15	-2.50821	1	0.0128594	1
Gm26474	-1.07031e-16	0.167091	0.0664728	0.0666238	-1.61015e-15	2.50798	1	0.0128676	1
Rps24-ps3	-1.55288e-16	-0.167077	0.066473	0.0666239	-2.33611e-15	-2.50777	1	0.0128752	1
Mettl3	-1.89182e-16	0.167056	0.0664733	0.0666242	-2.84599e-15	2.50743	1	0.012887	1
Dpy19l1	7.59365e-17	0.167006	0.0664738	0.0666247	1.14235e-15	2.50667	1	0.012914	1
Snora73b	6.47338e-17	0.16699	0.066474	0.0666249	9.73821e-16	2.50642	1	0.0129229	1
Gpc4	2.63866e-16	-0.166985	0.0664741	0.066625	3.96945e-15	-2.50634	1	0.0129258	1
Utrn	-3.93333e-16	-0.166975	0.0664742	0.0666251	-5.91708e-15	-2.50618	1	0.0129313	1
Cdk12	-2.04122e-16	0.166943	0.0664745	0.0666254	-3.07067e-15	2.5057	1	0.0129486	1
Cp	1.74249e-16	-0.166942	0.0664745	0.0666255	2.62129e-15	-2.50568	1	0.0129492	1
Gm7672	-1.40643e-16	0.166934	0.0664746	0.0666255	-2.11573e-15	2.50555	1	0.0129537	1
Gnb2	4.00798e-16	0.166883	0.0664752	0.0666261	6.02929e-15	2.50476	1	0.0129819	1
Fabp5	-1.35678e-16	-0.166875	0.0664753	0.0666262	-2.04103e-15	-2.50465	1	0.0129859	1
Gm25971	6.8464e-17	0.16686	0.0664755	0.0666264	1.02991e-15	2.50441	1	0.0129944	1
Il1r1	2.48375e-18	-0.166855	0.0664755	0.0666264	3.73634e-17	-2.50434	1	0.0129969	1
2610203C22Rik	-8.46371e-17	0.166738	0.0664769	0.0666278	-1.27318e-15	2.50253	1	0.0130619	1
Gm9752	-1.66789e-16	0.166682	0.0664775	0.0666284	-2.50895e-15	2.50167	1	0.0130927	1
Gm13340	-1.02063e-16	-0.166608	0.0664784	0.0666293	-1.53528e-15	-2.50052	1	0.0131338	1
Sirt7	1.24448e-17	0.166595	0.0664785	0.0666294	1.872e-16	2.50032	1	0.0131411	1
Parg	1.24432e-17	0.16654	0.0664791	0.0666301	1.87174e-16	2.49947	1	0.0131719	1
Gm16142	-2.48999e-17	0.166466	0.06648	0.0666309	-3.74547e-16	2.49834	1	0.0132128	1
Nek11	-6.97091e-17	0.166458	0.0664801	0.066631	-1.04857e-15	2.49821	1	0.0132174	1
Tmem106b	1.24461e-16	0.166373	0.066481	0.066632	1.87212e-15	2.4969	1	0.0132649	1
Pou6f2	-1.18334e-17	0.166373	0.066481	0.066632	-1.77996e-16	2.4969	1	0.013265	1
2019-09-08	-6.22436e-17	0.16637	0.0664811	0.066632	-9.3626e-16	2.49685	1	0.0132667	1
Sfi1	-1.66799e-16	0.166346	0.0664813	0.0666323	-2.50895e-15	2.49647	1	0.0132804	1
Mettl17	1.54331e-16	0.166301	0.0664819	0.0666328	2.3214e-15	2.49579	1	0.0133054	1
Isoc2b	4.08247e-16	0.166227	0.0664827	0.0666336	6.14065e-15	2.49464	1	0.0133471	1
Mapk3	4.73129e-17	-0.166183	0.0664832	0.0666341	7.11651e-16	-2.49396	1	0.0133722	1
Nup50	1.24323e-17	0.166178	0.0664833	0.0666342	1.87e-16	2.49388	1	0.0133749	1
Aldh16a1	3.48358e-17	0.166141	0.0664837	0.0666346	5.23975e-16	2.49332	1	0.0133956	1
Klhl40	3.67011e-17	0.166084	0.0664843	0.0666353	5.52026e-16	2.49243	1	0.0134283	1
Ctxn1	-4.87938e-16	0.166061	0.0664846	0.0666355	-7.33912e-15	2.49208	1	0.0134411	1
Pdxdc1	4.96041e-18	0.166052	0.0664847	0.0666356	7.46099e-17	2.49194	1	0.0134463	1
Gm13121	2.50794e-18	-0.166046	0.0664848	0.0666357	3.7722e-17	-2.49184	1	0.0134498	1
Gm27956	-3.38576e-16	0.16602	0.066485	0.066636	-5.09252e-15	2.49145	1	0.0134645	1
Enox1	-2.56428e-16	0.165982	0.0664855	0.0666364	-3.8569e-15	2.49086	1	0.0134862	1
Gm15981	-1.55608e-16	0.165944	0.0664859	0.0666368	-2.34047e-15	2.49027	1	0.0135079	1
Sh2d5	4.95683e-18	0.165932	0.066486	0.066637	7.45544e-17	2.49009	1	0.0135146	1
Imp4	7.217e-17	0.165919	0.0664862	0.0666371	1.08549e-15	2.48989	1	0.0135218	1
Cdk9	2.7381e-16	0.165897	0.0664864	0.0666374	4.11828e-15	2.48955	1	0.0135346	1
Enho	3.79655e-16	-0.165892	0.0664865	0.0666374	5.71026e-15	-2.48946	1	0.0135376	1
Gm6517	-2.85011e-16	-0.165854	0.0664869	0.0666379	-4.28672e-15	-2.48888	1	0.0135591	1
Gm28925	-1.09508e-16	-0.165835	0.0664871	0.0666381	-1.64706e-15	-2.48859	1	0.0135702	1
Gprc5c	1.89218e-16	-0.165834	0.0664872	0.0666381	2.84594e-15	-2.48858	1	0.0135703	1
Gm10220	3.54091e-16	0.165833	0.0664872	0.0666381	5.3257e-15	2.48856	1	0.0135712	1
Iqub	-6.41273e-17	0.165813	0.0664874	0.0666383	-9.64503e-16	2.48825	1	0.0135826	1
Gm21999	4.51176e-16	0.165799	0.0664876	0.0666385	6.78587e-15	2.48803	1	0.0135908	1
Zswim6	7.9633e-17	0.165747	0.0664881	0.0666391	1.1977e-15	2.48723	1	0.0136206	1
Homer1	4.95038e-18	0.165716	0.0664885	0.0666394	7.44547e-17	2.48676	1	0.0136382	1
Dcbld2	-2.51818e-18	0.165703	0.0664886	0.0666396	-3.78739e-17	2.48655	1	0.0136458	1
Egr1	-7.72005e-17	0.16568	0.0664889	0.0666398	-1.1611e-15	2.4862	1	0.0136589	1
Veph1	4.94637e-18	0.165582	0.06649	0.066641	7.43926e-17	2.48468	1	0.0137156	1
Gm16233	-2.41505e-16	0.165529	0.0664906	0.0666416	-3.63216e-15	2.48387	1	0.013746	1
Kcnc1	4.73328e-17	-0.165514	0.0664908	0.0666417	7.11871e-16	-2.48364	1	0.0137548	1
Adamts6	9.58765e-17	-0.165494	0.066491	0.0666419	1.44195e-15	-2.48333	1	0.0137663	1
Gm14040	-6.8213e-16	0.165412	0.0664919	0.0666429	-1.02588e-14	2.48207	1	0.0138138	1
Ubtd2	-2.97521e-16	0.165349	0.0664926	0.0666436	-4.4745e-15	2.4811	1	0.0138506	1
2019-09-02	2.73437e-17	0.16534	0.0664927	0.0666437	4.11228e-16	2.48096	1	0.0138557	1
Ptp4a2	-1.0335e-16	0.16532	0.066493	0.0666439	-1.5543e-15	2.48065	1	0.0138675	1
Gm24979	-6.22751e-17	0.165317	0.066493	0.066644	-9.36566e-16	2.48059	1	0.0138695	1
Gm28167	-1.51894e-16	0.165296	0.0664932	0.0666442	-2.28435e-15	2.48027	1	0.0138817	1
Fam195b	1.95375e-16	0.165258	0.0664937	0.0666446	2.93825e-15	2.47969	1	0.0139038	1
Slit2	-2.56449e-16	0.165258	0.0664937	0.0666446	-3.85675e-15	2.47968	1	0.013904	1
Acer3	2.96193e-16	0.16517	0.0664947	0.0666456	4.45438e-15	2.47833	1	0.0139553	1
Gm11738	-1.32825e-16	-0.165121	0.0664952	0.0666462	-1.99751e-15	-2.47757	1	0.0139842	1
Pih1d2	3.4805e-17	0.165112	0.0664953	0.0666463	5.2342e-16	2.47744	1	0.0139894	1
Gm14051	3.57803e-16	0.165094	0.0664955	0.0666465	5.38086e-15	2.47717	1	0.0139997	1
Nif3l1	3.99805e-18	0.165086	0.0664956	0.0666466	6.01251e-17	2.47704	1	0.0140043	1
Gm10718	-1.58029e-16	-0.16507	0.0664958	0.0666468	-2.37652e-15	-2.47679	1	0.014014	1
Gm10110	-7.34864e-17	0.165012	0.0664965	0.0666474	-1.10512e-15	2.47589	1	0.0140483	1
Gm14429	1.89244e-16	-0.164988	0.0664967	0.0666477	2.84591e-15	-2.47553	1	0.0140621	1
Gm24277	6.4152e-17	-0.164985	0.0664968	0.0666477	9.64739e-16	-2.47548	1	0.0140642	1
Dstyk	-8.469e-17	0.164967	0.066497	0.0666479	-1.27359e-15	2.4752	1	0.0140746	1
Rpia	-2.52724e-16	0.16496	0.066497	0.066648	-3.80053e-15	2.47509	1	0.0140791	1
Scyl3	4.92657e-18	0.164919	0.0664975	0.0666485	7.40866e-17	2.47446	1	0.0141032	1
Gm29129	6.46711e-17	0.164892	0.0664978	0.0666488	9.7253e-16	2.47405	1	0.0141189	1
Wipf3	4.97347e-17	0.164888	0.0664978	0.0666488	7.47914e-16	2.47399	1	0.0141214	1
Rft1	4.53014e-16	0.164846	0.0664983	0.0666493	6.81242e-15	2.47334	1	0.0141464	1
Myrip	1.58022e-16	0.164842	0.0664984	0.0666493	2.37633e-15	2.47328	1	0.0141485	1
Thap7	-6.60239e-17	0.164824	0.0664986	0.0666495	-9.92862e-16	2.47299	1	0.0141597	1
Gm27486	-1.3324e-16	0.16472	0.0664997	0.0666507	-2.00362e-15	2.47139	1	0.0142215	1
Sox5	-1.74848e-17	0.164689	0.0665001	0.066651	-2.62929e-16	2.47092	1	0.0142396	1
Slc50a1	1.61751e-16	0.16467	0.0665003	0.0666513	2.43233e-15	2.47062	1	0.0142513	1
Fam19a2	5.85613e-17	-0.164636	0.0665007	0.0666517	8.80612e-16	-2.4701	1	0.0142716	1
Socs5	2.52735e-16	-0.164602	0.0665011	0.066652	3.80046e-15	-2.46957	1	0.0142918	1
Serpinb8	-2.86342e-16	0.16459	0.0665012	0.0666522	-4.30581e-15	2.46938	1	0.0142993	1
4930407G08Rik	-6.41645e-17	0.164566	0.0665015	0.0666524	-9.64859e-16	2.46902	1	0.0143134	1
Lppr3	1.7432e-16	-0.164551	0.0665016	0.0666526	2.6213e-15	-2.46878	1	0.0143228	1
Brinp1	1.76683e-16	0.164539	0.0665018	0.0666527	2.65682e-15	2.4686	1	0.0143297	1
Gm23563	4.22536e-17	0.164456	0.0665027	0.0666537	6.35366e-16	2.46731	1	0.0143798	1
Chpt1	-3.98988e-17	0.164372	0.0665037	0.0666546	-5.99949e-16	2.46602	1	0.0144305	1
Ccdc37	-1.48872e-15	0.164339	0.066504	0.066655	-2.23855e-14	2.46551	1	0.0144504	1
Mettl24	-3.6167e-17	0.164295	0.0665045	0.0666555	-5.43828e-16	2.46483	1	0.014477	1
Htr1b	-3.87854e-15	0.164246	0.0665051	0.066656	-5.83195e-14	2.46409	1	0.0145063	1
Mrpl38	-2.49663e-17	0.164244	0.0665051	0.0666561	-3.75404e-16	2.46406	1	0.0145076	1
1700109K24Rik	1.23738e-17	0.164219	0.0665054	0.0666564	1.86057e-16	2.46366	1	0.0145232	1
Tmem50a	1.61736e-16	0.16417	0.0665059	0.0666569	2.4319e-15	2.4629	1	0.014553	1
4933407L21Rik	-9.2184e-17	0.164103	0.0665067	0.0666577	-1.38609e-15	2.46187	1	0.0145937	1
Epn1	1.05045e-15	0.164097	0.0665067	0.0666577	1.57946e-14	2.46179	1	0.0145969	1
Gm23202	1.6104e-17	0.164088	0.0665068	0.0666578	2.42141e-16	2.46165	1	0.0146025	1
Tdrd5	-3.42368e-16	0.164086	0.0665069	0.0666578	-5.14786e-15	2.46162	1	0.0146039	1
Ldha	-6.97806e-17	0.164065	0.0665071	0.0666581	-1.04922e-15	2.46129	1	0.0146169	1
Rbp4	3.99083e-17	-0.164054	0.0665072	0.0666582	6.00059e-16	-2.46113	1	0.0146233	1
Bcat2	-4.55098e-17	0.164041	0.0665074	0.0666583	-6.84282e-16	2.46092	1	0.0146313	1
Scai	1.98365e-17	0.164034	0.0665075	0.0666584	2.98259e-16	2.46081	1	0.0146359	1
Gm16425	6.65117e-17	0.164008	0.0665077	0.0666587	1.00006e-15	2.46041	1	0.0146518	1
Pik3r3	3.83446e-16	-0.16399	0.0665079	0.0666589	5.76542e-15	-2.46014	1	0.0146625	1
Gm14021	-1.09452e-16	-0.16394	0.0665085	0.0666595	-1.64568e-15	-2.45936	1	0.0146933	1
Ddx58	1.43058e-16	0.163912	0.0665088	0.0666598	2.15096e-15	2.45893	1	0.0147105	1
Sema6d	-6.32222e-16	-0.163901	0.0665089	0.0666599	-9.50583e-15	-2.45877	1	0.0147169	1
Atrip	-2.93831e-16	0.163895	0.066509	0.06666	-4.41791e-15	2.45866	1	0.0147212	1
Tubd1	1.61727e-16	0.163881	0.0665092	0.0666601	2.43165e-15	2.45846	1	0.0147293	1
Ankrd33b	5.27667e-16	0.163878	0.0665092	0.0666602	7.93375e-15	2.45841	1	0.0147313	1
Wdr89	4.97045e-17	0.163877	0.0665092	0.0666602	7.47332e-16	2.45839	1	0.0147319	1
Rad52	-1.74341e-16	0.163865	0.0665093	0.0666603	-2.6213e-15	2.4582	1	0.0147396	1
Rgs9bp	1.05714e-16	0.163807	0.06651	0.066661	1.58944e-15	2.45731	1	0.014775	1
Wdr45	1.66392e-16	0.163795	0.0665101	0.0666611	2.50176e-15	2.45713	1	0.0147823	1
Dph6	-1.14599e-16	0.163756	0.0665106	0.0666616	-1.72302e-15	2.45653	1	0.0148065	1
Mir329	2.42004e-16	0.163678	0.0665114	0.0666624	3.63853e-15	2.45533	1	0.0148547	1
Stox2	6.23241e-17	-0.163676	0.0665115	0.0666625	9.37043e-16	-2.45529	1	0.0148562	1
Zfp395	1.4074e-16	-0.163666	0.0665116	0.0666626	2.11602e-15	-2.45513	1	0.0148625	1
Gm9929	-1.74348e-16	0.163634	0.0665119	0.0666629	-2.6213e-15	2.45464	1	0.0148822	1
St6galnac6	-3.6187e-17	0.163624	0.066512	0.066663	-5.44068e-16	2.45449	1	0.0148884	1
Gm14843	6.46332e-17	0.163622	0.0665121	0.0666631	9.71751e-16	2.45446	1	0.0148896	1
Ranbp3l	-1.72481e-16	0.163618	0.0665121	0.0666631	-2.59323e-15	2.45441	1	0.0148918	1
D430036J16Rik	2.35579e-17	0.16361	0.0665122	0.0666632	3.54189e-16	2.45427	1	0.0148973	1
4930470G03Rik	2.35573e-17	0.163591	0.0665124	0.0666634	3.5418e-16	2.45399	1	0.0149085	1
Stmn2	1.69187e-16	0.163588	0.0665124	0.0666634	2.54368e-15	2.45393	1	0.0149109	1
1700123L14Rik	-2.19158e-16	0.163587	0.0665125	0.0666634	-3.295e-15	2.45393	1	0.0149111	1
Lztr1	-1.28608e-16	0.163537	0.066513	0.066664	-1.93358e-15	2.45316	1	0.0149421	1
Gm27000	2.35552e-17	0.163519	0.0665132	0.0666642	3.54143e-16	2.45287	1	0.0149536	1
Fth1	-1.00541e-17	0.163435	0.0665141	0.0666651	-1.51157e-16	2.45159	1	0.0150058	1
Adam17	-4.73951e-17	0.16343	0.0665142	0.0666652	-7.12556e-16	2.4515	1	0.0150093	1
Pik3r6	-2.12566e-17	0.163425	0.0665143	0.0666653	-3.1958e-16	2.45143	1	0.0150121	1
Cnga1	1.60834e-17	0.163399	0.0665146	0.0666656	2.41803e-16	2.45103	1	0.0150285	1
Scn9a	2.90113e-16	-0.163342	0.0665152	0.0666662	4.36161e-15	-2.45015	1	0.0150642	1
Pafah2	-1.4075e-16	0.163323	0.0665154	0.0666664	-2.11606e-15	2.44986	1	0.0150761	1
Gm22859	1.98131e-17	0.16325	0.0665162	0.0666672	2.97868e-16	2.44873	1	0.0151218	1
Mpp3	3.10143e-17	0.163217	0.0665166	0.0666676	4.66264e-16	2.44821	1	0.0151431	1
Gm13916	3.6148e-16	0.1632	0.0665168	0.0666678	5.43442e-15	2.44796	1	0.0151536	1
Rp31-ps19	-8.47433e-17	0.163182	0.066517	0.066668	-1.27401e-15	2.44768	1	0.0151649	1
Myl1	2.41576e-16	-0.163149	0.0665173	0.0666683	3.63177e-15	-2.44717	1	0.0151857	1
Cenpt	-1.47303e-17	0.163146	0.0665174	0.0666684	-2.21451e-16	2.44712	1	0.0151878	1
Ptger4	-2.49046e-16	0.163087	0.066518	0.066669	-3.74404e-15	2.44623	1	0.0152246	1
Dgkg	-2.19174e-16	0.163069	0.0665182	0.0666692	-3.29494e-15	2.44595	1	0.0152361	1
Gm2531	8.32851e-17	0.163004	0.066519	0.06667	1.25205e-15	2.44494	1	0.0152775	1
Olfr1017-ps1	-2.19176e-16	0.162988	0.0665191	0.0666701	-3.29493e-15	2.44469	1	0.0152877	1
Gm10130	6.79469e-17	-0.162949	0.0665196	0.0666706	1.02146e-15	-2.44409	1	0.0153125	1
A930015D03Rik	-1.59433e-16	0.162929	0.0665198	0.0666708	-2.39677e-15	2.44378	1	0.0153253	1
Mfsd6	-1.44496e-16	0.162921	0.0665199	0.0666709	-2.17223e-15	2.44366	1	0.0153302	1
Gm23255	-2.90523e-16	-0.162871	0.0665204	0.0666715	-4.36742e-15	-2.44288	1	0.0153624	1
Bcan	7.21808e-16	0.162834	0.0665208	0.0666719	1.08509e-14	2.44232	1	0.0153856	1
9330179D12Rik	-3.99454e-17	0.16281	0.0665211	0.0666721	-6.00492e-16	2.44196	1	0.0154009	1
Isg15	1.15496e-15	0.162709	0.0665222	0.0666733	1.7362e-14	2.44039	1	0.0154658	1
Igfbp4	1.97965e-17	0.162697	0.0665224	0.0666734	2.97592e-16	2.4402	1	0.0154738	1
Decr2	1.60596e-17	0.162601	0.0665234	0.0666745	2.41412e-16	2.43873	1	0.0155352	1
Tmod2	1.01943e-16	0.162592	0.0665235	0.0666746	1.53244e-15	2.4386	1	0.0155409	1
Gm11834	-1.24346e-16	-0.162545	0.0665241	0.0666751	-1.86919e-15	-2.43787	1	0.0155711	1
Slc25a10	8.70025e-17	0.162446	0.0665252	0.0666762	1.30781e-15	2.43634	1	0.0156356	1
Fzd1	-2.7744e-16	-0.162427	0.0665254	0.0666764	-4.17044e-15	-2.43606	1	0.0156474	1
4930538E20Rik	-2.04258e-16	0.162396	0.0665257	0.0666767	-3.07035e-15	2.43557	1	0.0156677	1
Serpina12	1.9679e-16	-0.16238	0.0665259	0.0666769	2.95809e-15	-2.43533	1	0.015678	1
Rint1	1.01937e-16	0.162377	0.0665259	0.066677	1.53229e-15	2.43527	1	0.0156805	1
Pop1	-3.24916e-17	0.162329	0.0665265	0.0666775	-4.88402e-16	2.43454	1	0.0157112	1
Gmcl1	-3.996e-17	0.162322	0.0665265	0.0666776	-6.00663e-16	2.43443	1	0.0157161	1
Bsn	2.73702e-16	0.162282	0.066527	0.066678	4.11415e-15	2.43382	1	0.0157417	1
Pla2g4e	2.304e-16	-0.162263	0.0665272	0.0666782	3.46325e-15	-2.43353	1	0.0157542	1
Gm26937	-1.03442e-16	0.162238	0.0665275	0.0666785	-1.55488e-15	2.43313	1	0.0157708	1
Gm17055	-3.18509e-16	-0.162231	0.0665275	0.0666786	-4.78763e-15	-2.43303	1	0.0157754	1
1700029I15Rik	3.07306e-16	0.162181	0.0665281	0.0666791	4.61918e-15	2.43226	1	0.0158079	1
Vps53	-2.62378e-18	0.162168	0.0665282	0.0666793	-3.94386e-17	2.43206	1	0.0158166	1
Ripply3	1.24334e-16	0.162133	0.0665286	0.0666797	1.86888e-15	2.43152	1	0.0158395	1
E130006D01Rik	9.51068e-18	0.162124	0.0665287	0.0666798	1.42956e-16	2.43138	1	0.0158454	1
Gm15688	-1.22116e-16	0.162123	0.0665287	0.0666798	-1.83553e-15	2.43137	1	0.0158459	1
Mir134	6.45881e-17	0.162113	0.0665289	0.0666799	9.70828e-16	2.43121	1	0.0158526	1
Smc2	4.52932e-16	0.162069	0.0665293	0.0666804	6.808e-15	2.43054	1	0.015881	1
4930519G04Rik	1.84077e-16	0.162051	0.0665295	0.0666806	2.76685e-15	2.43026	1	0.0158932	1
Nudt2	-1.10563e-18	-0.162011	0.06653	0.066681	-1.66185e-17	-2.42965	1	0.0159192	1
Thbs3	7.5787e-17	0.162001	0.0665301	0.0666811	1.13914e-15	2.42949	1	0.015926	1
Pabpn1	1.16858e-16	0.161879	0.0665315	0.0666825	1.75644e-15	2.4276	1	0.0160068	1
Gm26231	-9.97194e-17	0.161851	0.0665318	0.0666828	-1.49882e-15	2.42718	1	0.016025	1
Gm10687	-2.26679e-16	0.161842	0.0665319	0.0666829	-3.40707e-15	2.42705	1	0.0160308	1
Aldh1a3	1.37898e-15	0.161838	0.0665319	0.0666829	2.07266e-14	2.42698	1	0.0160338	1
Gm23163	1.09389e-16	0.161826	0.066532	0.0666831	1.64415e-15	2.42679	1	0.0160416	1
Chn1os3	-8.85184e-17	0.161811	0.0665322	0.0666832	-1.33046e-15	2.42656	1	0.0160519	1
Gprc5d	1.80334e-16	0.161761	0.0665328	0.0666838	2.71046e-15	2.42579	1	0.016085	1
Gm17060	-4.50727e-16	0.16173	0.0665331	0.0666841	-6.77448e-15	2.42532	1	0.0161053	1
Bbs12	-3.62461e-17	0.161647	0.066534	0.066685	-5.44775e-16	2.42404	1	0.0161603	1
Sc5d	3.78237e-16	0.161636	0.0665341	0.0666852	5.68486e-15	2.42387	1	0.0161676	1
Slc5a3	2.28872e-16	0.161586	0.0665347	0.0666857	3.43989e-15	2.4231	1	0.0162014	1
Ctsa	-7.35888e-17	0.161584	0.0665347	0.0666857	-1.10602e-15	2.42306	1	0.0162027	1
Gm20407	1.37069e-16	-0.161572	0.0665348	0.0666859	2.0601e-15	-2.42288	1	0.0162107	1
Rce1	-2.45357e-16	0.161569	0.0665349	0.0666859	-3.68765e-15	2.42283	1	0.0162129	1
Ly6g6c	-2.13122e-17	0.161564	0.0665349	0.066686	-3.20317e-16	2.42275	1	0.0162163	1
Aph1b	4.21671e-17	0.16156	0.066535	0.066686	6.33758e-16	2.4227	1	0.0162188	1
G530012D18Rik	-1.24933e-16	0.161557	0.066535	0.066686	-1.87771e-15	2.42265	1	0.0162208	1
Gm10925	1.89347e-16	-0.161528	0.0665353	0.0666864	2.84581e-15	-2.42221	1	0.01624	1
1110034G24Rik	3.46977e-17	0.16152	0.0665354	0.0666865	5.21493e-16	2.42209	1	0.0162453	1
Cabp1	-1.22135e-16	0.161489	0.0665358	0.0666868	-1.83563e-15	2.4216	1	0.0162665	1
Pid1	5.71008e-17	0.161473	0.0665359	0.066687	8.58195e-16	2.42136	1	0.0162771	1
Hmga2	-1.01133e-17	0.161453	0.0665361	0.0666872	-1.51997e-16	2.42105	1	0.0162902	1
Prpf18	-1.22136e-16	0.161436	0.0665363	0.0666874	-1.83563e-15	2.42079	1	0.016302	1
Ube2c	2.72269e-17	0.161431	0.0665364	0.0666874	4.09203e-16	2.42072	1	0.016305	1
Sh3bp5	-5.49241e-17	0.161393	0.0665368	0.0666879	-8.25469e-16	2.42013	1	0.0163307	1
Prtg	-4.2162e-17	-0.161389	0.0665369	0.0666879	-6.33663e-16	-2.42007	1	0.0163333	1
Pfdn4	7.85685e-17	0.161363	0.0665371	0.0666882	1.18082e-15	2.41967	1	0.0163507	1
Cstf3	-1.29607e-16	0.161358	0.0665372	0.0666882	-1.94789e-15	2.41959	1	0.0163541	1
Rpl36a-ps1	-7.54633e-17	0.161336	0.0665374	0.0666885	-1.13415e-15	2.41925	1	0.0163692	1
Hyal3	4.8194e-18	0.161331	0.0665375	0.0666885	7.24314e-17	2.41918	1	0.0163722	1
Ctage5	3.11013e-16	0.161298	0.0665379	0.0666889	4.67423e-15	2.41867	1	0.0163946	1
Gm18294	-1.96822e-16	0.161291	0.0665379	0.066689	-2.95805e-15	2.41855	1	0.0163997	1
Lrrc75b	1.0814e-16	-0.161223	0.0665387	0.0666897	1.62522e-15	-2.41751	1	0.0164454	1
5330416C01Rik	8.60323e-17	0.161217	0.0665388	0.0666898	1.29297e-15	2.41741	1	0.0164499	1
Cd109	8.04312e-17	0.161217	0.0665388	0.0666898	1.20879e-15	2.41741	1	0.0164499	1
Gm22840	7.94977e-17	0.161217	0.0665388	0.0666898	1.19476e-15	2.41741	1	0.0164499	1
Ssxb1	7.94977e-17	0.161217	0.0665388	0.0666898	1.19476e-15	2.41741	1	0.0164499	1
Gm11783	8.78993e-17	0.161217	0.0665388	0.0666898	1.32102e-15	2.41741	1	0.0164499	1
Gm15153	8.78993e-17	0.161217	0.0665388	0.0666898	1.32102e-15	2.41741	1	0.0164499	1
Gm16302	7.85641e-17	0.161217	0.0665388	0.0666898	1.18073e-15	2.41741	1	0.0164499	1
Gm17546	7.85641e-17	0.161217	0.0665388	0.0666898	1.18073e-15	2.41741	1	0.0164499	1
Gm24195	8.69658e-17	0.161217	0.0665388	0.0666898	1.30699e-15	2.41741	1	0.0164499	1
Gm3269	8.78993e-17	0.161217	0.0665388	0.0666898	1.32102e-15	2.41741	1	0.0164499	1
Gm5350	8.78993e-17	0.161217	0.0665388	0.0666898	1.32102e-15	2.41741	1	0.0164499	1
Serpinb2	8.78993e-17	0.161217	0.0665388	0.0666898	1.32102e-15	2.41741	1	0.0164499	1
Serpinb6b	8.78993e-17	0.161217	0.0665388	0.0666898	1.32102e-15	2.41741	1	0.0164499	1
Herc1	9.16326e-17	0.16119	0.066539	0.0666901	1.37713e-15	2.417	1	0.0164679	1
A930006L05Rik	-8.57366e-17	0.161181	0.0665391	0.0666902	-1.28851e-15	2.41686	1	0.0164741	1
Hlf	2.34167e-16	-0.161163	0.0665394	0.0666904	3.51923e-15	-2.41658	1	0.0164865	1
Gm11418	-1.37081e-16	0.161148	0.0665395	0.0666906	-2.06015e-15	2.41636	1	0.0164961	1
Mgat4a	-1.37082e-16	0.16114	0.0665396	0.0666907	-2.06015e-15	2.41624	1	0.0165016	1
Gm21738	-5.66793e-16	-0.161136	0.0665396	0.0666907	-8.51813e-15	-2.41617	1	0.0165043	1
Gm13543	-1.25879e-16	0.161135	0.0665397	0.0666907	-1.8918e-15	2.41615	1	0.0165055	1
Pex5	1.69113e-16	0.161127	0.0665397	0.0666908	2.54153e-15	2.41603	1	0.0165106	1
Ceacam12	9.81651e-17	0.161118	0.0665398	0.0666909	1.47528e-15	2.41589	1	0.0165168	1
Pafah1b1	1.09367e-16	0.161094	0.0665401	0.0666912	1.64362e-15	2.41552	1	0.0165332	1
Pcdhga5	-2.43793e-16	-0.161082	0.0665402	0.0666913	-3.66385e-15	-2.41533	1	0.0165414	1
Irgm1	9.06945e-17	0.161037	0.0665407	0.0666918	1.36299e-15	2.41464	1	0.0165721	1
Paxbp1	-7.73407e-17	0.16099	0.0665413	0.0666923	-1.1623e-15	2.41391	1	0.0166043	1
9530082P21Rik	6.02262e-16	0.160958	0.0665416	0.0666927	9.05091e-15	2.41343	1	0.0166256	1
Nptxr	7.94899e-17	0.160957	0.0665416	0.0666927	1.19459e-15	2.41342	1	0.0166264	1
Bves	5.52181e-17	0.160948	0.0665417	0.0666928	8.29827e-16	2.41328	1	0.0166326	1
1110008F13Rik	-1.18418e-16	0.160923	0.066542	0.0666931	-1.77959e-15	2.41289	1	0.01665	1
4930478K11Rik	-7.17421e-17	0.160903	0.0665422	0.0666933	-1.07814e-15	2.41258	1	0.0166636	1
Gm14285	1.97429e-17	0.160902	0.0665422	0.0666933	2.96698e-16	2.41257	1	0.0166641	1
4930578G10Rik	2.21383e-16	0.160887	0.0665424	0.0666934	3.32695e-15	2.41233	1	0.0166747	1
Rpl21-ps3	6.26842e-17	0.160878	0.0665425	0.0666935	9.42017e-16	2.4122	1	0.0166805	1
Ttpal	-4.74723e-17	0.160847	0.0665428	0.0666939	-7.13409e-16	2.41172	1	0.0167021	1
Gm12828	-2.77392e-16	-0.160823	0.0665431	0.0666941	-4.16861e-15	-2.41135	1	0.0167182	1
Lefty1	2.18551e-15	0.160818	0.0665431	0.0666942	3.28435e-14	2.41128	1	0.0167214	1
Gm14769	-8.10802e-17	0.160808	0.0665433	0.0666943	-1.21846e-15	2.41112	1	0.0167286	1
Alg13	-1.74433e-16	0.160794	0.0665434	0.0666945	-2.62134e-15	2.41091	1	0.016738	1
Slc2a6	-6.24106e-17	0.160781	0.0665435	0.0666946	-9.3789e-16	2.4107	1	0.0167473	1
Slc30a4	-8.91378e-16	0.160753	0.0665439	0.0666949	-1.33953e-14	2.41028	1	0.0167664	1
Gm6695	-1.55764e-16	0.160722	0.0665442	0.0666953	-2.34077e-15	2.40979	1	0.016788	1
Mc4r	-6.6547e-16	0.160627	0.0665452	0.0666963	-1.00003e-14	2.40833	1	0.0168536	1
Rpl39l	2.07372e-16	0.160616	0.0665454	0.0666964	3.11625e-15	2.40817	1	0.016861	1
Amigo1	-2.81119e-16	-0.160574	0.0665458	0.0666969	-4.22444e-15	-2.40752	1	0.01689	1
Clic1	1.52293e-16	0.160573	0.0665458	0.0666969	2.28854e-15	2.4075	1	0.0168909	1
Ptprb	-3.68614e-16	0.160488	0.0665468	0.0666978	-5.53918e-15	2.40619	1	0.01695	1
Tpd52l2	-6.4082e-18	0.160483	0.0665468	0.0666979	-9.62961e-17	2.40612	1	0.0169533	1
Matk	1.12149e-16	0.160477	0.0665469	0.066698	1.68526e-15	2.40602	1	0.0169576	1
Usp13	2.19252e-16	-0.160439	0.0665473	0.0666984	3.29468e-15	-2.40544	1	0.0169838	1
Gm11437	1.14947e-16	0.160408	0.0665476	0.0666987	1.72729e-15	2.40496	1	0.0170056	1
Alox8	-2.74148e-17	0.160403	0.0665477	0.0666988	-4.11957e-16	2.40489	1	0.017009	1
Rpa2	-1.66976e-16	0.160395	0.0665478	0.0666989	-2.50912e-15	2.40477	1	0.0170145	1
Gm25848	8.32059e-17	0.160351	0.0665483	0.0666993	1.25031e-15	2.40408	1	0.0170455	1
Map4k3	4.79005e-18	0.160349	0.0665483	0.0666994	7.19786e-17	2.40406	1	0.0170467	1
Ppp2r3a	4.78924e-18	0.160322	0.0665486	0.0666997	7.19661e-17	2.40364	1	0.0170657	1
Prickle1	2.86469e-16	-0.160317	0.0665486	0.0666997	4.30466e-15	-2.40357	1	0.0170689	1
LTR86B2	1.10276e-16	0.160287	0.066549	0.0667	1.65707e-15	2.4031	1	0.0170903	1
Dnah3	1.10276e-16	0.160287	0.066549	0.0667	1.65707e-15	2.4031	1	0.0170903	1
Eya2	1.10276e-16	0.160287	0.066549	0.0667	1.65707e-15	2.4031	1	0.0170903	1
Gm17113	1.10276e-16	0.160287	0.066549	0.0667	1.65707e-15	2.4031	1	0.0170903	1
Lgi4	1.10276e-16	0.160287	0.066549	0.0667	1.65707e-15	2.4031	1	0.0170903	1
Slc4a5	1.10276e-16	0.160287	0.066549	0.0667	1.65707e-15	2.4031	1	0.0170903	1
Cdh3	1.02808e-16	0.160287	0.066549	0.0667	1.54485e-15	2.4031	1	0.0170903	1
Gm12151	1.02808e-16	0.160287	0.066549	0.0667	1.54485e-15	2.4031	1	0.0170903	1
Gm9051	1.02808e-16	0.160287	0.066549	0.0667	1.54485e-15	2.4031	1	0.0170903	1
Ptx3	1.00941e-16	0.160287	0.066549	0.0667	1.51679e-15	2.4031	1	0.0170903	1
Gtsf1l	1.01874e-16	0.160287	0.066549	0.0667	1.53082e-15	2.4031	1	0.0170903	1
Hhla1	1.09343e-16	0.160287	0.066549	0.0667	1.64304e-15	2.4031	1	0.0170903	1
Ccdc64	-2.68064e-18	0.160264	0.0665492	0.0667003	-4.02806e-17	2.40275	1	0.0171059	1
Sybu	1.22173e-16	-0.160214	0.0665498	0.0667008	1.83581e-15	-2.40198	1	0.0171413	1
Gm16415	-8.28329e-18	0.160214	0.0665498	0.0667008	-1.24468e-16	2.40197	1	0.0171416	1
Traf3ip1	1.05606e-16	0.16021	0.0665498	0.0667009	1.58687e-15	2.40192	1	0.0171437	1
Gm22304	-1.42713e-16	0.160138	0.0665506	0.0667017	-2.14442e-15	2.40081	1	0.0171946	1
Cnppd1	-9.88372e-17	0.160133	0.0665507	0.0667017	-1.48514e-15	2.40073	1	0.0171984	1
Herc4	-1.14709e-16	0.160077	0.0665513	0.0667023	-1.72362e-15	2.39987	1	0.0172375	1
Ccnt1	4.78041e-18	0.160026	0.0665518	0.0667029	7.18298e-17	2.39909	1	0.0172736	1
Gm22698	2.43841e-17	0.160016	0.0665519	0.066703	3.66391e-16	2.39894	1	0.0172805	1
Cul2	9.43974e-17	0.159992	0.0665522	0.0667033	1.4184e-15	2.39856	1	0.0172981	1
Adck2	3.18442e-16	0.159983	0.0665523	0.0667034	4.78484e-15	2.39843	1	0.0173038	1
Ccdc173	1.46674e-16	0.159979	0.0665523	0.0667034	2.20389e-15	2.39836	1	0.017307	1
Ptgs2os	-2.32281e-17	0.159931	0.0665529	0.0667039	-3.49017e-16	2.39762	1	0.0173411	1
4933431E20Rik	6.26536e-17	0.159856	0.0665537	0.0667048	9.414e-16	2.39647	1	0.0173943	1
Tcfl5	-3.62997e-17	0.159854	0.0665537	0.0667048	-5.45419e-16	2.39644	1	0.0173958	1
Ski	-4.95826e-17	-0.159797	0.0665543	0.0667054	-7.44994e-16	-2.39556	1	0.0174365	1
Fopnl	4.7722e-18	0.159751	0.0665548	0.0667059	7.17033e-17	2.39486	1	0.0174688	1
Gm26852	7.12842e-17	0.159705	0.0665553	0.0667064	1.07105e-15	2.39415	1	0.0175016	1
Mis18bp1	5.42749e-17	-0.159689	0.0665555	0.0667066	8.15483e-16	-2.3939	1	0.0175131	1
n-R5s65	-2.17409e-16	0.159646	0.066556	0.0667071	-3.26656e-15	2.39325	1	0.0175438	1
Ect2l	6.82479e-17	0.159626	0.0665562	0.0667073	1.02542e-15	2.39293	1	0.0175587	1
Rnf123	3.1843e-16	0.159587	0.0665566	0.0667077	4.78435e-15	2.39233	1	0.0175866	1
Prox1os	-2.66153e-16	-0.159565	0.0665568	0.0667079	-3.99888e-15	-2.392	1	0.0176021	1
L1MdA_VI	-4.39744e-17	-0.15956	0.0665569	0.066708	-6.60704e-16	-2.39192	1	0.0176054	1
Rnf128	1.20523e-16	0.159556	0.0665569	0.066708	1.81082e-15	2.39186	1	0.0176085	1
Hist1h2al	1.9147e-16	0.159543	0.0665571	0.0667082	2.87678e-15	2.39165	1	0.0176181	1
Zbtb20	1.61597e-16	0.159522	0.0665573	0.0667084	2.42794e-15	2.39133	1	0.0176334	1
Lin37	-3.25765e-17	0.159489	0.0665577	0.0667088	-4.89447e-16	2.39082	1	0.0176571	1
Coq10b	-2.86495e-16	0.159472	0.0665579	0.066709	-4.30445e-15	2.39056	1	0.0176691	1
Hs6st1	2.99684e-17	0.159455	0.0665581	0.0667091	4.5026e-16	2.3903	1	0.0176816	1
Elk4	1.98935e-16	0.159431	0.0665583	0.0667094	2.98888e-15	2.38994	1	0.0176985	1
Zfp654	-1.14729e-16	0.159415	0.0665585	0.0667096	-1.72373e-15	2.38969	1	0.01771	1
5530601H04Rik	-1.03527e-16	0.159398	0.0665587	0.0667098	-1.55542e-15	2.38942	1	0.0177226	1
A230065N10Rik	-9.97927e-17	0.159397	0.0665587	0.0667098	-1.49932e-15	2.38941	1	0.0177232	1
Mtor	-1.5207e-16	0.159391	0.0665587	0.0667098	-2.28475e-15	2.38932	1	0.0177277	1
Slc9b2	3.08987e-17	0.159347	0.0665592	0.0667103	4.64229e-16	2.38864	1	0.0177594	1
Dhx16	2.30672e-16	0.15933	0.0665594	0.0667105	3.46565e-15	2.38838	1	0.0177718	1
Sh3bp2	-4.56509e-17	0.159317	0.0665596	0.0667107	-6.85866e-16	2.38817	1	0.0177815	1
Rims3	-3.18419e-16	-0.159217	0.0665606	0.0667117	-4.7839e-15	-2.38664	1	0.0178536	1
B4galnt3	-1.67013e-16	0.159179	0.0665611	0.0667122	-2.50917e-15	2.38606	1	0.0178814	1
Aggf1	1.05575e-16	0.159167	0.0665612	0.0667123	1.58613e-15	2.38587	1	0.0178902	1
Abl2	-2.19291e-16	0.159129	0.0665616	0.0667127	-3.29456e-15	2.38529	1	0.0179177	1
Gm10419	-1.76526e-17	0.159072	0.0665622	0.0667133	-2.65205e-16	2.38441	1	0.0179596	1
Gm7805	8.03845e-16	0.159041	0.0665626	0.0667137	1.20765e-14	2.38393	1	0.0179823	1
Sall3	-2.27862e-16	-0.15903	0.0665627	0.0667138	-3.42327e-15	-2.38376	1	0.0179903	1
Zfp335	-1.4088e-16	0.158996	0.066563	0.0667141	-2.11648e-15	2.38324	1	0.0180151	1
Srgap3	5.70266e-17	0.158987	0.0665631	0.0667142	8.56729e-16	2.38311	1	0.0180214	1
Akr1b10	-6.52449e-16	0.158987	0.0665631	0.0667143	-9.80196e-15	2.3831	1	0.018022	1
Gm29114	1.31707e-16	0.158944	0.0665636	0.0667147	1.97866e-15	2.38245	1	0.018053	1
Ptp4a3	-8.487e-17	0.158942	0.0665636	0.0667147	-1.27502e-15	2.38241	1	0.018055	1
Dis3l	3.83543e-17	0.158927	0.0665638	0.0667149	5.76204e-16	2.38218	1	0.018066	1
Fxyd7	2.13856e-16	0.158908	0.066564	0.0667151	3.21278e-15	2.3819	1	0.0180794	1
C030005K15Rik	1.76515e-16	0.158899	0.0665641	0.0667152	2.6518e-15	2.38176	1	0.018086	1
Dnah9	3.78155e-16	0.15889	0.0665642	0.0667153	5.68106e-15	2.38162	1	0.0180928	1
Gm17149	5.14208e-17	0.158834	0.0665648	0.0667159	7.72493e-16	2.38074	1	0.0181345	1
Fer1l6	-3.68664e-16	0.158812	0.066565	0.0667162	-5.53841e-15	2.38041	1	0.0181505	1
Gm22468	8.48757e-17	-0.158752	0.0665657	0.0667168	1.27507e-15	-2.37949	1	0.018195	1
Ttc8	3.33341e-16	0.158715	0.0665661	0.0667172	5.00766e-15	2.37892	1	0.0182224	1
Zfp784	1.29832e-16	0.158674	0.0665665	0.0667176	1.95041e-15	2.3783	1	0.0182523	1
Xpo5	6.91811e-16	0.15865	0.0665668	0.0667179	1.03927e-14	2.37792	1	0.0182705	1
Maged2	-7.56862e-17	-0.158627	0.066567	0.0667182	-1.13699e-15	-2.37757	1	0.0182874	1
Car11	-8.48796e-17	0.158621	0.0665671	0.0667182	-1.2751e-15	2.37748	1	0.0182919	1
Acss2	8.68875e-17	0.158593	0.0665674	0.0667185	1.30526e-15	2.37705	1	0.0183125	1
Slco3a1	-2.56649e-16	0.158586	0.0665675	0.0667186	-3.85546e-15	2.37694	1	0.018318	1
Gm9758	5.16306e-16	0.158571	0.0665676	0.0667188	7.75612e-15	2.3767	1	0.0183292	1
Idh3b	-2.51375e-17	0.158512	0.0665683	0.0667194	-3.7762e-16	2.3758	1	0.0183731	1
Wee2	2.38115e-16	0.158501	0.0665684	0.0667195	3.577e-15	2.37563	1	0.0183812	1
Fam214a	4.52825e-16	0.158488	0.0665685	0.0667197	6.80238e-15	2.37543	1	0.0183911	1
Teddm2	-2.26779e-16	0.158468	0.0665688	0.0667199	-3.40669e-15	2.37512	1	0.018406	1
Gdap1	1.96698e-17	0.158456	0.0665689	0.06672	2.95481e-16	2.37494	1	0.0184146	1
Zbed4	3.68806e-16	0.158425	0.0665692	0.0667204	5.54018e-15	2.37446	1	0.0184382	1
Vsx2	-1.25961e-16	0.158413	0.0665694	0.0667205	-1.89217e-15	2.37428	1	0.0184471	1
Gm15810	-2.41718e-16	0.158383	0.0665697	0.0667208	-3.63106e-15	2.37381	1	0.0184697	1
Phc2	-9.98239e-17	0.158354	0.06657	0.0667211	-1.49953e-15	2.37338	1	0.0184908	1
Prr14l	3.93074e-16	0.158327	0.0665703	0.0667214	5.90465e-15	2.37295	1	0.0185115	1
Cyb561d2	2.66114e-16	0.15829	0.0665707	0.0667218	3.99747e-15	2.3724	1	0.0185388	1
L1_Mus2_3end	1.14762e-16	-0.158286	0.0665707	0.0667219	1.72391e-15	-2.37233	1	0.018542	1
C2	-6.24856e-17	0.158268	0.0665709	0.066722	-9.38632e-16	2.37205	1	0.0185555	1
Magi2	1.54091e-16	0.158267	0.0665709	0.0667221	2.31469e-15	2.37204	1	0.0185563	1
B130046B21Rik	2.71313e-17	0.158232	0.0665713	0.0667224	4.07553e-16	2.3715	1	0.0185828	1
Gm13787	3.25857e-16	0.158205	0.0665716	0.0667227	4.89484e-15	2.37108	1	0.0186032	1
Adnp2	-8.86273e-17	0.158164	0.0665721	0.0667232	-1.3313e-15	2.37045	1	0.0186342	1
Glt28d2	-3.63507e-17	0.158146	0.0665722	0.0667234	-5.46033e-16	2.37018	1	0.0186474	1
Ankrd35	6.07354e-17	0.158142	0.0665723	0.0667234	9.12322e-16	2.37011	1	0.0186509	1
0610037L13Rik	-1.14767e-16	0.158135	0.0665724	0.0667235	-1.72394e-15	2.37001	1	0.0186559	1
Frat2	5.34963e-16	0.158112	0.0665726	0.0667237	8.03578e-15	2.36965	1	0.0186735	1
Tada2a	2.71266e-17	0.158074	0.066573	0.0667242	4.07471e-16	2.36906	1	0.0187023	1
Gm9750	6.4467e-17	0.15806	0.0665732	0.0667243	9.68363e-16	2.36885	1	0.0187127	1
Gm23961	-5.50243e-17	0.158038	0.0665734	0.0667245	-8.26521e-16	2.36852	1	0.0187292	1
9530052E02Rik	2.15243e-17	0.158035	0.0665734	0.0667246	3.23317e-16	2.36847	1	0.0187315	1
Fgf2os	-1.0357e-16	0.157945	0.0665744	0.0667255	-1.55571e-15	2.36709	1	0.0187997	1
Grin2b	5.2749e-16	0.157943	0.0665744	0.0667256	7.92331e-15	2.36705	1	0.0188017	1
Gm5434	-2.70241e-17	0.157859	0.0665753	0.0667265	-4.05917e-16	2.36576	1	0.0188658	1
Gm12289	-1.33446e-16	0.157839	0.0665756	0.0667267	-2.00443e-15	2.36545	1	0.0188811	1
Trpc7	1.55944e-16	0.157783	0.0665762	0.0667273	2.34234e-15	2.36459	1	0.0189236	1
Actr6	4.2293e-16	0.157755	0.0665765	0.0667276	6.35255e-15	2.36416	1	0.0189452	1
Mettl7a3	-4.19639e-17	0.15774	0.0665766	0.0667278	-6.3031e-16	2.36394	1	0.0189564	1
Slc35b1	-6.99697e-17	0.157737	0.0665767	0.0667278	-1.05096e-15	2.36389	1	0.0189588	1
Rrp12	-2.7562e-18	0.157735	0.0665767	0.0667278	-4.13989e-17	2.36386	1	0.0189603	1
Gm10714	8.31271e-17	0.157713	0.0665769	0.0667281	1.24859e-15	2.36352	1	0.0189773	1
Plxdc2	3.46293e-16	-0.157699	0.0665771	0.0667282	5.20139e-15	-2.36331	1	0.0189877	1
GSAT_MM	-4.70729e-18	-0.157579	0.0665784	0.0667295	-7.07031e-17	-2.36145	1	0.0190806	1
Galnt3	-8.49113e-17	0.15756	0.0665786	0.0667297	-1.27535e-15	2.36116	1	0.0190951	1
Zfp322a	-1.07316e-16	0.157559	0.0665786	0.0667297	-1.61187e-15	2.36115	1	0.0190958	1
2700049A03Rik	-2.5668e-16	0.157531	0.0665789	0.06673	-3.85528e-15	2.36072	1	0.0191176	1
Gm11714	-1.74532e-16	0.157466	0.0665796	0.0667307	-2.62141e-15	2.35973	1	0.0191673	1
Synb	7.93854e-17	0.15746	0.0665796	0.0667308	1.19234e-15	2.35963	1	0.0191724	1
Npas3	3.91109e-16	-0.157453	0.0665797	0.0667309	5.8743e-15	-2.35952	1	0.0191775	1
Tsta3	-6.52496e-16	0.157429	0.06658	0.0667311	-9.80018e-15	2.35915	1	0.0191961	1
Thtpa	3.57504e-16	-0.157408	0.0665802	0.0667313	5.36952e-15	-2.35883	1	0.0192123	1
Sec61a2	4.20425e-17	0.15739	0.0665804	0.0667315	6.31455e-16	2.35856	1	0.019226	1
Eif4g1	-3.53771e-16	0.157378	0.0665805	0.0667317	-5.31343e-15	2.35836	1	0.019236	1
Zfp420	-1.07321e-16	0.157374	0.0665806	0.0667317	-1.6119e-15	2.35832	1	0.0192385	1
Gm26514	5.51084e-17	0.157277	0.0665816	0.0667327	8.27683e-16	2.35683	1	0.0193139	1
Rere	-1.07324e-16	0.157276	0.0665816	0.0667328	-1.61192e-15	2.3568	1	0.0193153	1
Gpi1	-6.99848e-17	0.157229	0.0665821	0.0667333	-1.05111e-15	2.35608	1	0.0193516	1
Oser1	-4.01132e-17	0.157195	0.0665825	0.0667336	-6.02458e-16	2.35556	1	0.019378	1
Naip2	-1.67073e-16	0.157168	0.0665828	0.0667339	-2.50925e-15	2.35515	1	0.0193992	1
Hoxb3	2.62347e-16	0.157159	0.0665829	0.066734	3.94015e-15	2.35501	1	0.0194063	1
Endov	1.21622e-17	0.157135	0.0665831	0.0667343	1.82662e-16	2.35464	1	0.0194252	1
Gm15261	6.99878e-17	-0.15713	0.0665832	0.0667343	1.05113e-15	-2.35456	1	0.0194292	1
Gm16755	1.68993e-16	0.157121	0.0665833	0.0667344	2.53807e-15	2.35442	1	0.0194362	1
Ccbl2	5.42401e-16	0.157105	0.0665834	0.0667346	8.14619e-15	2.35418	1	0.0194484	1
Gm6159	-1.16665e-16	0.157093	0.0665836	0.0667347	-1.75216e-15	2.35399	1	0.0194581	1
Sdc1	1.15782e-16	0.157084	0.0665837	0.0667348	1.73889e-15	2.35385	1	0.019465	1
Gm12912	-5.13189e-17	0.157079	0.0665837	0.0667349	-7.70742e-16	2.35378	1	0.0194686	1
Adck4	2.28737e-16	0.157079	0.0665837	0.0667349	3.43534e-15	2.35377	1	0.0194691	1
Gm3160	6.81713e-17	0.157062	0.0665839	0.0667351	1.02384e-15	2.35352	1	0.0194823	1
Hyls1	-5.13202e-17	0.157036	0.0665842	0.0667353	-7.70756e-16	2.35312	1	0.0195026	1
Tespa1	-3.07836e-17	0.157007	0.0665845	0.0667357	-4.62324e-16	2.35267	1	0.0195255	1
Arpc5	2.13798e-16	0.156969	0.0665849	0.0667361	3.2109e-15	2.35208	1	0.0195557	1
Golga4	-3.23912e-16	0.156929	0.0665853	0.0667365	-4.86461e-15	2.35147	1	0.0195873	1
E230016K23Rik	-2.51852e-17	0.156915	0.0665855	0.0667366	-3.78239e-16	2.35125	1	0.0195981	1
Gm22904	-2.78435e-18	0.156793	0.0665868	0.066738	-4.18153e-17	2.34938	1	0.0196945	1
Flrt2	1.21517e-17	0.156784	0.0665869	0.066738	1.82494e-16	2.34925	1	0.0197013	1
Zbtb16	1.16705e-16	0.156758	0.0665872	0.0667383	1.75267e-15	2.34884	1	0.0197225	1
Trpc1	1.39109e-16	0.156729	0.0665875	0.0667386	2.08912e-15	2.34839	1	0.0197454	1
Gm14379	-5.12489e-16	0.15672	0.0665876	0.0667387	-7.69647e-15	2.34826	1	0.0197523	1
A930002H24Rik	-9.61391e-17	0.156704	0.0665877	0.0667389	-1.4438e-15	2.34801	1	0.0197653	1
Rictor	-1.07342e-16	0.156695	0.0665878	0.066739	-1.61203e-15	2.34788	1	0.0197721	1
Gm20687	-4.60239e-16	-0.156679	0.066588	0.0667392	-6.91174e-15	-2.34764	1	0.0197846	1
Rpl7a-ps12	2.81002e-16	0.15666	0.0665882	0.0667394	4.22e-15	2.34733	1	0.0198003	1
Foxp1	2.43661e-16	0.156645	0.0665884	0.0667395	3.65921e-15	2.3471	1	0.0198121	1
Pcbd1	2.74466e-16	0.156621	0.0665886	0.0667398	4.12182e-15	2.34674	1	0.0198312	1
Gnai3	-1.14813e-16	0.156594	0.0665889	0.0667401	-1.7242e-15	2.34633	1	0.0198522	1
Nck1	-2.08165e-16	0.156589	0.066589	0.0667401	-3.12612e-15	2.34624	1	0.0198569	1
Tigit	-3.63973e-17	0.156584	0.066589	0.0667402	-5.46597e-16	2.34617	1	0.0198604	1
Wiz	1.1677e-17	0.156516	0.0665898	0.0667409	1.75357e-16	2.34512	1	0.019915	1
Kpna6	-1.44689e-16	0.156468	0.0665903	0.0667414	-2.17283e-15	2.34439	1	0.0199533	1
Snx13	2.70785e-17	0.156463	0.0665903	0.0667415	4.06643e-16	2.34431	1	0.0199573	1
Prmt6	-1.44689e-16	0.156462	0.0665903	0.0667415	-2.17283e-15	2.3443	1	0.0199577	1
Gpr156	4.94817e-17	0.156421	0.0665908	0.0667419	7.43072e-16	2.34367	1	0.019991	1
Prkdc	-7.74774e-17	0.156411	0.0665909	0.066742	-1.16348e-15	2.34351	1	0.0199991	1
Eif2b4	4.67038e-18	0.156343	0.0665916	0.0667428	7.01347e-17	2.34247	1	0.0200536	1
Asap2	1.09225e-16	0.156343	0.0665916	0.0667428	1.64022e-15	2.34247	1	0.0200537	1
Gm13117	-1.74566e-16	0.156334	0.0665917	0.0667429	-2.62144e-15	2.34233	1	0.020061	1
Gm10197	1.37228e-16	0.156272	0.0665924	0.0667435	2.06072e-15	2.34139	1	0.0201106	1
Gm15191	1.94173e-16	0.156257	0.0665925	0.0667437	2.91583e-15	2.34114	1	0.0201233	1
Ppfia3	2.43649e-16	0.156234	0.0665928	0.0667439	3.65878e-15	2.3408	1	0.0201411	1
Gm13837	-5.04108e-17	0.156228	0.0665928	0.066744	-7.57e-16	2.3407	1	0.0201464	1
Manba	2.66046e-17	0.156226	0.0665929	0.066744	3.99512e-16	2.34067	1	0.0201483	1
Gm15232	-2.95925e-16	-0.156203	0.0665931	0.0667443	-4.44378e-15	-2.34032	1	0.0201667	1
Gm23785	1.83902e-16	0.156193	0.0665932	0.0667444	2.76157e-15	2.34017	1	0.0201743	1
Gm27206	6.72107e-17	0.156155	0.0665936	0.0667448	1.00927e-15	2.33959	1	0.0202053	1
Gif	-1.33498e-16	0.156105	0.0665941	0.0667453	-2.00465e-15	2.33881	1	0.0202461	1
Gm15542	9.42808e-17	0.156087	0.0665943	0.0667455	1.41575e-15	2.33854	1	0.0202604	1
Btg1	-2.66048e-16	-0.156063	0.0665946	0.0667458	-3.99504e-15	-2.33817	1	0.02028	1
Wfdc5	-1.72708e-16	0.156031	0.0665949	0.0667461	-2.59341e-15	2.33768	1	0.0203061	1
Gm25475	-1.82045e-16	0.155961	0.0665957	0.0667469	-2.73359e-15	2.33661	1	0.0203628	1
Gm29091	1.91362e-16	0.155918	0.0665961	0.0667473	2.87347e-15	2.33594	1	0.0203981	1
Wdr45b	2.28702e-16	0.155883	0.0665965	0.0667477	3.43414e-15	2.33541	1	0.0204264	1
Ppp1r14b	1.44685e-16	0.155882	0.0665965	0.0667477	2.17256e-15	2.3354	1	0.0204273	1
Gm9457	5.69324e-17	0.155837	0.066597	0.0667482	8.5488e-16	2.33469	1	0.0204647	1
Med12l	3.31414e-16	-0.155773	0.0665977	0.0667489	4.97636e-15	-2.33372	1	0.0205169	1
A330102I10Rik	1.21191e-17	0.155691	0.0665985	0.0667497	1.81972e-16	2.33246	1	0.0205842	1
Gm12511	-7.00318e-17	0.155658	0.0665989	0.0667501	-1.05155e-15	2.33195	1	0.0206116	1
Gm10287	7.37304e-17	0.155657	0.0665989	0.0667501	1.10708e-15	2.33193	1	0.0206124	1
Ppp2r2d	6.43947e-17	0.15564	0.0665991	0.0667503	9.66901e-16	2.33168	1	0.0206259	1
Iffo1	-7.75006e-17	0.155634	0.0665991	0.0667503	-1.16369e-15	2.33159	1	0.0206308	1
Gm8840	-6.62985e-17	0.155631	0.0665992	0.0667504	-9.95485e-16	2.33153	1	0.0206338	1
Gm27406	1.37209e-16	0.155627	0.0665992	0.0667504	2.06022e-15	2.33147	1	0.0206372	1
Trmt6	1.11536e-16	0.155585	0.0665997	0.0667509	1.67472e-15	2.33083	1	0.0206717	1
Mir154	9.21406e-16	-0.155558	0.0666	0.0667511	1.38349e-14	-2.33042	1	0.0206936	1
Gm4631	-1.74589e-16	0.155547	0.0666001	0.0667513	-2.62146e-15	2.33024	1	0.0207033	1
Hapln4	-5.13654e-17	0.155523	0.0666003	0.0667515	-7.71248e-16	2.32987	1	0.0207231	1
Amn1	-4.38972e-17	0.155523	0.0666003	0.0667515	-6.59114e-16	2.32987	1	0.0207232	1
Gm5342	2.10019e-16	0.155472	0.0666009	0.0667521	3.1534e-15	2.3291	1	0.020765	1
Mib2	-3.64307e-17	0.155467	0.0666009	0.0667521	-5.47e-16	2.32902	1	0.0207693	1
Stap1	-4.29656e-17	0.155459	0.066601	0.0667522	-6.45119e-16	2.3289	1	0.0207755	1
Gm27587	-6.11481e-16	0.155431	0.0666013	0.0667525	-9.18121e-15	2.32846	1	0.0207995	1
Gm6651	-8.42625e-18	0.155428	0.0666013	0.0667525	-1.26518e-16	2.32842	1	0.0208018	1
Zfp27	1.09196e-16	0.155383	0.0666018	0.066753	1.63954e-15	2.32774	1	0.0208387	1
Gm25188	9.07306e-19	0.155372	0.0666019	0.0667531	1.36228e-17	2.32757	1	0.0208478	1
Nup43	4.63979e-18	0.155319	0.0666025	0.0667537	6.9664e-17	2.32675	1	0.0208923	1
Camk2a	-2.34342e-16	0.155316	0.0666025	0.0667537	-3.51851e-15	2.32669	1	0.0208952	1
Krtcap3	-6.82432e-16	0.155315	0.0666025	0.0667537	-1.02463e-14	2.32668	1	0.020896	1
Phyhd1	1.01726e-16	0.15531	0.0666026	0.0667538	1.52735e-15	2.3266	1	0.0209001	1
Rprm	-1.95078e-16	-0.1553	0.0666027	0.0667539	-2.92897e-15	-2.32645	1	0.0209085	1
Gm12385	-3.98643e-16	0.155262	0.0666031	0.0667543	-5.98535e-15	2.32587	1	0.0209403	1
Irak1bp1	-2.52348e-17	0.155254	0.0666032	0.0667544	-3.78883e-16	2.32576	1	0.0209462	1
Cblc	-1.02994e-17	0.155224	0.0666035	0.0667547	-1.54637e-16	2.32529	1	0.0209714	1
Dram1	-1.18588e-16	0.155213	0.0666036	0.0667548	-1.78051e-15	2.32512	1	0.0209811	1
Cyp11a1	1.95709e-17	0.155145	0.0666043	0.0667555	2.93839e-16	2.32407	1	0.0210381	1
4933428G20Rik	2.58551e-16	0.155105	0.0666048	0.066756	3.88187e-15	2.32347	1	0.0210711	1
Uhrf1bp1l	-2.94094e-16	0.155091	0.0666049	0.0667561	-4.4155e-15	2.32326	1	0.0210828	1
Capzb	2.06273e-16	0.15508	0.066605	0.0667562	3.09696e-15	2.32308	1	0.0210925	1
Slc5a6	2.54814e-16	0.155002	0.0666059	0.0667571	3.8257e-15	2.32188	1	0.0211584	1
Arid3a	-2.15086e-17	0.15499	0.066606	0.0667572	-3.22923e-16	2.32169	1	0.0211684	1
[truncated: 25,697 more rows]
