# Supplementary material for: Identification of bona fide B2 SINE retrotransposon transcription through single-nucleus RNA-seq of the mouse hippocampus
Source: HighWire-hosted journal article supplement (doi:10.1101/gr.262196.120), 2020-10-29
Supplement: Supplemental_Table_S2.xlsx [file Supplemental_Table_S2.xlsx]

## Sheet: Legend S2
Supplemental Table S2. Association with B2_Mm1t controlled for Arc expression
estimate_int	y-intercept
estimate_arc	effect of Arc expression
estimate_B2_mm1t	effect of B2_Mm1t expression
err_int	error associated with the intercept term
err_arc	error associated with the Arc term
err_B2_mm1t	error associated with the B2_Mm1t term
t_int	t-value, intercept
t_arc	t-value, Arc
t_B2_mm1t	t-value, B2_Mm1t
p_int	p-value, intercept
p_arc	p-value, Arc
p_B2_mm1t	p-value, B2_Mm1t
padj_B2_mm1t	FDR adjusted B2_Mm1t p-value
padj_arc	FDR adjusted Arc p-value

## Sheet: Supplemental Table S2
Gene Symbol	estimate_int	estimate_arc	estimate_B2_mm1t	err_int	err_arc	err_B2_mm1t	t_int	t_arc	t_B2_mm1t	p_int	p_arc	p_B2_mm1t	padj_B2_mm1t	padj_arc
B2_Mm1a	4.82728e-16	0.011088	0.974837	0.00808638	0.00902153	0.00902153	5.96965e-14	1.22906	108.057	1	0.219521	0	0	1
B2_Mm1t	3.9195e-31	-5.02225e-16	1	3.76786e-17	4.2036e-17	4.2036e-17	1.04024e-14	-11.9475	2.37892e+16	1	1.02567e-29	0	0	3.06654e-25
PB1	-2.00687e-16	0.00823512	-0.609225	0.0321662	0.035886	0.035886	-6.23907e-15	0.22948	-16.9767	1	0.818573	3.0606e-53	9.15548e-49	1
H2-T23	-1.41089e-17	0.148191	0.507372	0.0326941	0.0364749	0.0364749	-4.31543e-16	4.06283	13.9102	1	5.48036e-05	2.06348e-38	6.17248e-34	1
Slc28a3	1.91483e-16	0.153444	-0.488733	0.0362425	0.0404338	0.0404338	5.28338e-15	3.79495	-12.0873	1	0.000162383	2.61248e-30	7.81445e-26	1
4.5SRNA	-3.25971e-16	-0.146121	-0.446542	0.0343375	0.0383085	0.0383085	-9.49315e-15	-3.81433	-11.6565	1	0.000150426	1.71487e-28	5.12935e-24	1
UCON87	1.08265e-15	0.0817636	-0.403344	0.0374815	0.0418161	0.0418161	2.88848e-14	1.95531	-9.64567	1	0.0510014	1.37553e-20	4.11421e-16	1
Malat1	1.69982e-15	0.101211	0.387831	0.0362602	0.0404534	0.0404534	4.68783e-14	2.50193	9.58709	1	0.0126123	2.25526e-20	6.74525e-16	1
B2L_S	-7.95514e-17	0.0999095	-0.399256	0.0376141	0.041964	0.041964	-2.11493e-15	2.38084	-9.51426	1	0.0175787	4.15791e-20	1.24355e-15	1
BC1_Ma	6.57464e-17	-0.231413	-0.366835	0.034699	0.0387118	0.0387118	1.89476e-15	-5.97784	-9.47607	1	3.8455e-09	5.72257e-20	1.71145e-15	0.00011375
BC1_Mm	-1.31667e-16	-0.229767	-0.366084	0.034746	0.0387641	0.0387641	-3.78941e-15	-5.92732	-9.44389	1	5.14889e-09	7.48449e-20	2.23831e-15	0.000152232
Lars2	-9.75138e-19	0.0158619	-0.38215	0.0374661	0.0417989	0.0417989	-2.60272e-17	0.379483	-9.1426	1	0.704461	8.94494e-19	2.67498e-14	1
ID_Rn2	-1.02202e-16	-0.242569	-0.351079	0.034835	0.0388634	0.0388634	-2.9339e-15	-6.24157	-9.03366	1	8.10438e-10	2.1618e-18	6.46463e-14	2.4023e-05
Cit	-2.86085e-17	-0.128093	-0.362242	0.0364111	0.0406218	0.0406218	-7.85709e-16	-3.15331	-8.91742	1	0.00169347	5.4953e-18	1.64326e-13	1
BC1_Rn	7.73455e-17	-0.235453	-0.341507	0.0351671	0.039234	0.039234	2.19937e-15	-6.00124	-8.70438	1	3.35695e-09	2.96715e-17	8.87239e-13	9.93322e-05
Gm15662	-1.36436e-16	0.352124	-0.339087	0.037629	0.0419805	0.0419805	-3.62583e-15	8.38779	-8.07725	1	3.43426e-16	3.54417e-15	1.05974e-10	1.02416e-11
Tapbpl	-1.57935e-17	0.237663	0.320236	0.035556	0.0396679	0.0396679	-4.44186e-16	5.99132	8.07292	1	3.5563e-09	3.65963e-15	1.09423e-10	0.000105217
Gm23935	-5.6525e-16	0.0520233	-0.325178	0.0384866	0.0429374	0.0429374	-1.46869e-14	1.21161	-7.57331	1	0.226131	1.35082e-13	4.03882e-09	1
Gm24245	-5.6525e-16	0.0520233	-0.325178	0.0384866	0.0429374	0.0429374	-1.46869e-14	1.21161	-7.57331	1	0.226131	1.35082e-13	4.03882e-09	1
Gm24270	-5.6525e-16	0.0520233	-0.325178	0.0384866	0.0429374	0.0429374	-1.46869e-14	1.21161	-7.57331	1	0.226131	1.35082e-13	4.03882e-09	1
STRIDE1	-7.05472e-16	0.0557475	-0.31233	0.0386609	0.0431318	0.0431318	-1.82477e-14	1.29249	-7.2413	1	0.196676	1.34223e-12	4.01273e-08	1
Mir6240	1.13913e-16	-0.106527	-0.303281	0.037663	0.0420186	0.0420186	3.02454e-15	-2.53524	-7.21778	1	0.0114854	1.57436e-12	4.70654e-08	1
Gm15564	-1.16014e-16	0.0887668	-0.310914	0.0387688	0.0432522	0.0432522	-2.99247e-15	2.05231	-7.18839	1	0.0405652	1.9205e-12	5.74114e-08	1
Erbb4	5.99395e-16	-0.156121	-0.287633	0.0373381	0.0416561	0.0416561	1.60532e-14	-3.74786	-6.90496	1	0.000195269	1.26219e-11	3.77307e-07	1
Gabrg3	-6.0401e-16	-0.0537375	-0.289371	0.0383406	0.0427744	0.0427744	-1.57538e-14	-1.2563	-6.76505	1	0.209488	3.12497e-11	9.34117e-07	1
Mrpl13	3.97732e-16	-0.0453058	0.292566	0.0388577	0.0433514	0.0433514	1.02356e-14	-1.04508	6.74872	1	0.296398	3.47026e-11	1.0373e-06	1
Cdh9	7.30815e-16	0.12853	0.282088	0.0377442	0.0421091	0.0421091	1.93623e-14	3.0523	6.69899	1	0.00236955	4.76894e-11	1.42544e-06	1
Bdnf	-3.19976e-16	0.522775	0.225926	0.0305528	0.0340861	0.0340861	-1.04729e-14	15.3369	6.62809	1	3.75162e-45	7.47885e-11	2.23535e-06	1.122e-40
Fnbp1l	3.11901e-16	-0.18069	-0.27187	0.0372684	0.0415783	0.0415783	8.36904e-15	-4.34579	-6.53876	1	1.6252e-05	1.31093e-10	3.91809e-06	0.468609
Snf8	-8.89088e-17	0.0520332	0.275104	0.0385388	0.0429955	0.0429955	-2.307e-15	1.2102	6.39843	1	0.22667	3.1258e-10	9.34207e-06	1
n-R5-8s1	-3.92866e-16	-0.232653	-0.2618	0.0366825	0.0409246	0.0409246	-1.07099e-14	-5.68491	-6.39714	1	2.02874e-08	3.1505e-10	9.41559e-06	0.000598702
Mrps26	-3.70633e-16	-0.0576883	0.278481	0.0390517	0.0435678	0.0435678	-9.49083e-15	-1.3241	6.39189	1	0.185964	3.25363e-10	9.72346e-06	1
5330434G04Rik	1.51613e-16	-0.254499	-0.258226	0.036391	0.0405994	0.0405994	4.16622e-15	-6.26853	-6.36034	1	6.8897e-10	3.94654e-10	1.17939e-05	2.04245e-05
HAL1-4C_Cpo	-4.31692e-16	0.108851	-0.277533	0.0391459	0.0436729	0.0436729	-1.10278e-14	2.49242	-6.3548	1	0.0129513	4.08221e-10	1.21989e-05	1
Kcnh7	-4.7112e-16	0.00886654	-0.275626	0.0389007	0.0433993	0.0433993	-1.21108e-14	0.204302	-6.35094	1	0.838186	4.17946e-10	1.24891e-05	1
Ntm	-8.02281e-16	-0.210028	-0.261746	0.0370214	0.0413027	0.0413027	-2.16707e-14	-5.08508	-6.33725	1	4.89378e-07	4.54295e-10	1.35748e-05	0.0143417
Grik1	-1.34078e-15	-0.122782	-0.26862	0.0379978	0.042392	0.042392	-3.52856e-14	-2.89635	-6.33657	1	0.00391033	4.56182e-10	1.36307e-05	1
Exosc2	-2.60648e-16	0.164831	0.261902	0.0376189	0.0419693	0.0419693	-6.92864e-15	3.92742	6.24031	1	9.56493e-05	8.16568e-10	2.43982e-05	1
Polr2l	-2.93199e-16	0.31913	0.24581	0.0354341	0.0395318	0.0395318	-8.2745e-15	8.07274	6.21804	1	3.66462e-15	9.33323e-10	2.78858e-05	1.09253e-10
Rtn4rl1	4.63952e-17	0.393044	0.232653	0.0340746	0.0380151	0.0380151	1.36158e-15	10.3392	6.12002	1	3.36298e-23	1.6727e-09	4.99753e-05	1.00483e-18
Nrp1	-2.42341e-16	0.362744	0.236594	0.0346928	0.0387048	0.0387048	-6.98532e-15	9.37205	6.11277	1	1.35949e-19	1.7459e-09	5.21607e-05	4.05917e-15
Fmnl1	-4.52049e-16	0.439192	0.22449	0.0330771	0.0369022	0.0369022	-1.36665e-14	11.9015	6.08337	1	1.60559e-29	2.07637e-09	6.20317e-05	4.80024e-25
Gm25732	-2.08724e-16	0.0423278	-0.264208	0.0391555	0.0436836	0.0436836	-5.33064e-15	0.968963	-6.04823	1	0.332947	2.55198e-09	7.62378e-05	1
Vip	4.25488e-16	-0.131221	-0.25547	0.0380895	0.0424943	0.0424943	1.11708e-14	-3.08798	-6.01186	1	0.00210664	3.1557e-09	9.42703e-05	1
Mir344g	-8.43042e-16	-0.227525	-0.245984	0.0370097	0.0412896	0.0412896	-2.2779e-14	-5.51047	-5.95753	1	5.28128e-08	4.32534e-09	0.000129207	0.00155602
Macf1	4.97129e-17	-0.223584	-0.246098	0.0370661	0.0413525	0.0413525	1.3412e-15	-5.40677	-5.95122	1	9.21587e-08	4.48604e-09	0.000134003	0.00271251
L1-1_Str	6.51492e-16	0.112356	-0.259247	0.0393143	0.0438607	0.0438607	1.65714e-14	2.56166	-5.91069	1	0.0106563	5.66541e-09	0.000169226	1
Inhba	-3.64336e-16	0.649132	0.175115	0.027041	0.0301681	0.0301681	-1.34735e-14	21.5171	5.80465	1	7.17512e-77	1.0368e-08	0.000309682	2.14644e-72
Ppfia2	1.6384e-16	0.0766498	0.249868	0.0386616	0.0431326	0.0431326	4.23779e-15	1.77707	5.79301	1	0.0760537	1.1073e-08	0.000330728	1
Fxyd6	-3.48955e-16	-0.225331	-0.238272	0.0371582	0.0414553	0.0414553	-9.39108e-15	-5.43552	-5.74769	1	7.90456e-08	1.42898e-08	0.000426795	0.00232734
Ptgs2	-4.07531e-16	0.51725	0.199915	0.03134	0.0349643	0.0349643	-1.30036e-14	14.7937	5.71768	1	1.50319e-42	1.69024e-08	0.000504808	4.49543e-38
Map1b	3.76155e-16	0.175726	0.239115	0.0378079	0.0421801	0.0421801	9.9491e-15	4.16609	5.66889	1	3.54549e-05	2.21738e-08	0.000662221	1
Mbnl3	3.99051e-16	-0.137131	-0.241528	0.0382115	0.0426305	0.0426305	1.04432e-14	-3.21674	-5.66562	1	0.00136508	2.25799e-08	0.000674327	1
Erc2	-4.03098e-17	0.111266	0.24133	0.0384685	0.0429172	0.0429172	-1.04786e-15	2.59257	5.62315	1	0.0097542	2.85492e-08	0.000852565	1
Fanca	-1.26177e-16	-0.0132934	-0.244759	0.0391295	0.0436546	0.0436546	-3.22459e-15	-0.304514	-5.60671	1	0.76084	3.12513e-08	0.000933225	1
Olfm2	-3.11989e-16	-0.139887	-0.238978	0.0382155	0.042635	0.042635	-8.16393e-15	-3.28104	-5.60522	1	0.00109314	3.15077e-08	0.000940851	1
Car12	-2.7705e-16	0.231898	0.232286	0.0371507	0.0414469	0.0414469	-7.45746e-15	5.59506	5.60443	1	3.33137e-08	3.16447e-08	0.000944912	0.000982189
Gad2	-4.42521e-16	-0.104891	-0.238953	0.0385555	0.0430142	0.0430142	-1.14775e-14	-2.43851	-5.5552	1	0.0150316	4.14219e-08	0.00123682	1
Unc13d	1.7592e-16	0.0258011	0.242217	0.0390899	0.0436104	0.0436104	4.50041e-15	0.591627	5.5541	1	0.554319	4.16719e-08	0.00124424	1
Zbtb20	-7.18139e-17	0.109385	0.238573	0.0385196	0.0429742	0.0429742	-1.86435e-15	2.54536	5.55154	1	0.0111612	4.2258e-08	0.0012617	1
L1B_RN	4.56113e-15	0.115939	-0.243962	0.0394414	0.0440026	0.0440026	1.15643e-13	2.63483	-5.54426	1	0.00863134	4.39658e-08	0.00131264	1
PB1D10	-4.66839e-16	0.1382	-0.243179	0.0394296	0.0439894	0.0439894	-1.18398e-14	3.14167	-5.52812	1	0.00176112	4.7994e-08	0.00143286	1
Cntn4	-4.81587e-16	-0.0767207	-0.238966	0.0387891	0.0432748	0.0432748	-1.24155e-14	-1.77287	-5.52205	1	0.0767484	4.96006e-08	0.00148078	1
Dlx1as	2.13483e-16	-0.164175	-0.233348	0.0380218	0.0424188	0.0424188	5.61475e-15	-3.87032	-5.50105	1	0.000120384	5.55734e-08	0.00165903	1
Rab3c	-2.69289e-16	-0.120643	-0.235129	0.0384566	0.0429039	0.0429039	-7.00242e-15	-2.81194	-5.48036	1	0.00508242	6.21367e-08	0.0018549	1
Dlx1	7.15046e-16	-0.177661	-0.231064	0.0378933	0.0422754	0.0422754	1.887e-14	-4.20246	-5.46569	1	3.03462e-05	6.72389e-08	0.00200715	0.870419
Atp1b2	6.7852e-17	-0.060311	-0.236512	0.0389365	0.0434393	0.0434393	1.74263e-15	-1.3884	-5.44464	1	0.165522	7.52788e-08	0.00224707	1
Maf	3.82703e-16	-0.119705	-0.233711	0.0384829	0.0429332	0.0429332	9.94476e-15	-2.78817	-5.44359	1	0.0054657	7.57048e-08	0.00225971	1
B3	1.31818e-16	0.161066	0.231044	0.0380873	0.0424919	0.0424919	3.46093e-15	3.7905	5.43737	1	0.000165246	7.82702e-08	0.00233621	1
Disp2	-5.58616e-16	-0.232116	-0.223326	0.0372775	0.0415884	0.0415884	-1.49853e-14	-5.58127	-5.3699	1	3.59263e-08	1.12086e-07	0.00334545	0.00105911
Tmsb10	1.26184e-15	-0.175056	-0.227354	0.0379735	0.0423649	0.0423649	3.32294e-14	-4.1321	-5.36657	1	4.09623e-05	1.14084e-07	0.00340495	1
L1MdA_IV	1.21864e-15	0.124337	-0.234463	0.0395096	0.0440786	0.0440786	3.08443e-14	2.8208	-5.31921	1	0.00494598	1.46437e-07	0.00437041	1
Kidins220	6.71084e-17	-0.139979	-0.227563	0.0383584	0.0427943	0.0427943	1.74951e-15	-3.27098	-5.3176	1	0.00113208	1.47677e-07	0.00440728	1
Celf2	-3.45e-16	0.132409	0.227857	0.038431	0.0428754	0.0428754	-8.97713e-15	3.08823	5.31441	1	0.00210489	1.50174e-07	0.00448164	1
Nptx1	3.95085e-16	0.191181	0.223413	0.037829	0.0422037	0.0422037	1.0444e-14	4.52994	5.29369	1	7.09718e-06	1.67398e-07	0.00499549	0.205683
Lingo1	-4.52084e-17	0.580404	0.175747	0.0297621	0.0332039	0.0332039	-1.51899e-15	17.48	5.29297	1	8.76502e-56	1.68026e-07	0.00501405	2.62197e-51
Cbln2	3.66816e-16	-0.0740275	-0.229174	0.0389195	0.0434203	0.0434203	9.425e-15	-1.70491	-5.27804	1	0.08872	1.81655e-07	0.00542059	1
Vwc2	-2.72211e-16	-0.0759313	-0.228991	0.0389074	0.0434068	0.0434068	-6.99639e-15	-1.74929	-5.27548	1	0.0807422	1.84101e-07	0.0054934	1
E030030I06Rik	-1.30286e-16	-0.129384	-0.225865	0.0384849	0.0429354	0.0429354	-3.38538e-15	-3.01345	-5.26058	1	0.00268989	1.9896e-07	0.00593656	1
Calm1	-1.58598e-16	0.152153	0.224226	0.038272	0.042698	0.042698	-4.14396e-15	3.56346	5.25144	1	0.000394545	2.08633e-07	0.00622498	1
Pcmtd2	-3.19047e-16	-0.142359	-0.224373	0.0383731	0.0428107	0.0428107	-8.31433e-15	-3.3253	-5.24105	1	0.000936132	2.202e-07	0.0065699	1
Snhg11	-3.22788e-16	-0.403538	-0.201107	0.0344185	0.0383988	0.0383988	-9.37832e-15	-10.5091	-5.23733	1	7.37174e-24	2.24482e-07	0.00669741	2.20282e-19
2610203C20Rik	-1.94996e-15	-0.265724	-0.215478	0.0368791	0.041144	0.041144	-5.28744e-14	-6.45841	-5.23718	1	2.16019e-10	2.24655e-07	0.00670236	6.41121e-06
Ppp3ca	3.37589e-16	0.0927614	0.226505	0.0388042	0.0432916	0.0432916	8.69981e-15	2.14271	5.23208	1	0.0325309	2.30676e-07	0.00688176	1
BC030500	-1.55248e-15	-0.0663187	-0.22722	0.038996	0.0435057	0.0435057	-3.98112e-14	-1.52437	-5.22276	1	0.127934	2.42073e-07	0.00722152	1
Lmo7	-3.56136e-16	0.350996	0.206128	0.0354794	0.0395824	0.0395824	-1.00378e-14	8.86748	5.20759	1	8.18184e-18	2.61808e-07	0.00781	2.44171e-13
UCON41	3.76498e-15	0.124901	-0.227846	0.0395572	0.0441318	0.0441318	9.51782e-14	2.83018	-5.16286	1	0.00480509	3.29457e-07	0.0098277	1
Igf1	4.56904e-16	-0.150342	-0.220655	0.0383354	0.0427686	0.0427686	1.19186e-14	-3.51525	-5.15928	1	0.000471862	3.35556e-07	0.0100093	1
Slc6a1	-4.43044e-16	-0.26776	-0.211624	0.0369031	0.0411708	0.0411708	-1.20056e-14	-6.50363	-5.14015	1	1.63186e-10	3.70007e-07	0.0110366	4.84467e-06
Gm28438	1.68963e-15	0.0802167	-0.226399	0.0395721	0.0441484	0.0441484	4.26974e-14	1.81698	-5.12813	1	0.0697102	3.93388e-07	0.0117336	1
Myo1c	-7.59072e-18	0.0896883	0.222204	0.0388767	0.0433725	0.0433725	-1.95251e-16	2.06786	5.12315	1	0.0390736	4.03473e-07	0.012034	1
CAVID2D	2.14217e-15	0.0979727	-0.224804	0.0395922	0.0441708	0.0441708	5.41058e-14	2.21804	-5.08944	1	0.0269188	4.78725e-07	0.014278	1
B2_RnY	1.18046e-16	0.117841	0.217639	0.0386894	0.0431636	0.0431636	3.05111e-15	2.73009	5.04219	1	0.00651427	6.0739e-07	0.0181148	1
Tmem108	-1.02974e-15	0.0246637	0.220326	0.0393171	0.0438639	0.0438639	-2.61906e-14	0.562278	5.02294	1	0.574133	6.68874e-07	0.0199478	1
Rbms3	-8.54881e-16	-0.1254	-0.216035	0.0386383	0.0431066	0.0431066	-2.21252e-14	-2.90906	-5.01163	1	0.00375698	7.07762e-07	0.0211069	1
L1MdGf_II	2.50239e-15	0.0945167	-0.22128	0.0396181	0.0441997	0.0441997	6.31627e-14	2.1384	-5.00636	1	0.03288	7.2662e-07	0.0216685	1
L1-1_Dor	4.25788e-15	0.0982661	-0.220577	0.0396234	0.0442057	0.0442057	1.07459e-13	2.22293	-4.98978	1	0.0265857	7.8916e-07	0.0235328	1
Slc35f1	3.00925e-16	-0.108184	-0.215771	0.0387955	0.043282	0.043282	7.7567e-15	-2.49951	-4.98523	1	0.0126979	8.07212e-07	0.0240703	1
Gm15124	4.68939e-16	0.0314756	0.218535	0.039299	0.0438437	0.0438437	1.19326e-14	0.717906	4.98442	1	0.47309	8.10502e-07	0.0241675	1
R91ES8_RN	8.64091e-16	0.118601	-0.219987	0.0396183	0.0442	0.0442	2.18104e-14	2.68327	-4.97709	1	0.00748796	8.40533e-07	0.0250622	1
Tubg1	-1.25031e-16	-0.167489	-0.212215	0.0382524	0.042676	0.042676	-3.26858e-15	-3.92467	-4.9727	1	9.67218e-05	8.59031e-07	0.0256129	1
Synpo	-4.904e-16	0.506347	0.178018	0.0321421	0.0358591	0.0358591	-1.52573e-14	14.1205	4.96436	1	2.19338e-39	8.95268e-07	0.0266924	6.55929e-35
Rpgr	4.35989e-16	-0.0934715	-0.214973	0.0389254	0.043427	0.043427	1.12006e-14	-2.15238	-4.95022	1	0.031758	9.60151e-07	0.0286259	1
Cnr1	-1.12008e-15	-0.20234	-0.209099	0.0378756	0.0422557	0.0422557	-2.95726e-14	-4.78847	-4.94844	1	2.111e-06	9.6862e-07	0.0288775	0.0615018
Nrn1	4.11841e-16	0.427122	0.18817	0.0340879	0.0380299	0.0380299	1.20817e-14	11.2312	4.94795	1	9.72265e-27	9.70958e-07	0.0289462	2.9062e-22
Gm10040	-3.30894e-16	-0.0348684	-0.216585	0.0392995	0.0438443	0.0438443	-8.41979e-15	-0.795277	-4.93987	1	0.426761	1.01045e-06	0.0301224	1
Ttc3	-3.41334e-16	-0.140349	-0.212139	0.0385393	0.0429962	0.0429962	-8.85676e-15	-3.26422	-4.93391	1	0.00115894	1.04056e-06	0.031019	1
B2_Rat3	1.4554e-16	0.174389	0.209827	0.0382037	0.0426217	0.0426217	3.80958e-15	4.09156	4.92299	1	4.85954e-05	1.098e-06	0.0327303	1
Gabra1	-1.07704e-16	0.0255007	-0.21666	0.0395501	0.0441238	0.0441238	-2.72324e-15	0.577934	-4.91027	1	0.563522	1.16881e-06	0.03484	1
Eutr1	-3.66803e-15	0.0845392	-0.217148	0.0396457	0.0442305	0.0442305	-9.25203e-14	1.91134	-4.90946	1	0.0564291	1.17344e-06	0.0349768	1
Hgf	-1.19164e-18	-0.205686	0.215796	0.0394065	0.0439636	0.0439636	-3.02396e-17	-4.67855	4.90851	1	3.55986e-06	1.17891e-06	0.0351387	0.103489
Schip1	1.64547e-16	0.323714	0.197579	0.0361472	0.0403274	0.0403274	4.55214e-15	8.02714	4.89938	1	5.13226e-15	1.23286e-06	0.0367453	1.52998e-10
Egfr	7.93605e-17	-0.0970973	-0.211519	0.0389336	0.0434361	0.0434361	2.03835e-15	-2.23541	-4.86966	1	0.0257511	1.42547e-06	0.0424847	1
Glra2	2.41049e-16	0.0379128	-0.214861	0.0395977	0.0441769	0.0441769	6.08746e-15	0.858204	-4.86366	1	0.391116	1.46773e-06	0.0437426	1
HAL1-1H_Cpo	-4.92097e-15	0.113269	-0.215093	0.0396562	0.0442422	0.0442422	-1.24091e-13	2.5602	-4.86172	1	0.0107005	1.48163e-06	0.0441556	1
Lppr4	5.37763e-17	0.0889109	0.210866	0.0390045	0.0435151	0.0435151	1.37872e-15	2.04322	4.8458	1	0.0414593	1.60073e-06	0.0477033	1
Srxn1	-5.47176e-16	0.424732	0.184615	0.0342097	0.0381659	0.0381659	-1.59948e-14	11.1286	4.83716	1	2.53923e-26	1.66919e-06	0.0497418	7.58976e-22
Wipf3	1.87064e-16	0.344064	0.193182	0.0358274	0.0399706	0.0399706	5.22126e-15	8.60793	4.83311	1	6.3022e-17	1.70228e-06	0.0507262	1.88001e-12
Uchl5	-1.39813e-16	0.0399564	0.211934	0.0393162	0.0438629	0.0438629	-3.55612e-15	0.910938	4.83175	1	0.362687	1.71353e-06	0.0510596	1
Cntnap2	3.03715e-16	-0.206559	-0.204038	0.0378866	0.0422679	0.0422679	8.01644e-15	-4.88691	-4.82725	1	1.31042e-06	1.75118e-06	0.0521798	0.0382604
Gm4791	3.76176e-16	-0.103375	-0.209383	0.0389055	0.0434047	0.0434047	9.66896e-15	-2.38165	-4.82395	1	0.0175406	1.77931e-06	0.0530164	1
Acan	9.14737e-16	0.35269	0.191961	0.0356758	0.0398015	0.0398015	2.56403e-14	8.86121	4.82296	1	8.59989e-18	1.78785e-06	0.0532691	2.56638e-13
Arglu1	-1.33501e-16	-0.212752	0.211814	0.0393929	0.0439485	0.0439485	-3.38895e-15	-4.84094	4.8196	1	1.63889e-06	1.81709e-06	0.0541384	0.0478033
Gad1	1.60926e-17	0.116521	-0.213217	0.0396661	0.0442533	0.0442533	4.05702e-16	2.63304	-4.81811	1	0.00867644	1.83023e-06	0.0545282	1
Jun	-1.27931e-15	0.279258	0.198235	0.0369109	0.0411794	0.0411794	-3.46594e-14	6.7815	4.81393	1	2.81125e-11	1.86751e-06	0.0556368	8.35334e-07
Gm14204	-2.41296e-17	-0.18003	-0.205044	0.0381973	0.0426146	0.0426146	-6.31709e-16	-4.22462	-4.81158	1	2.75858e-05	1.88878e-06	0.0562686	0.791878
Gm15962	-2.61589e-16	-0.0855122	-0.209437	0.039045	0.0435603	0.0435603	-6.69968e-15	-1.96308	-4.80797	1	0.0500906	1.92195e-06	0.0572549	1
Pvrl3	1.06737e-16	0.0146117	0.211582	0.0394466	0.0440084	0.0440084	2.70586e-15	0.33202	4.80778	1	0.739988	1.92376e-06	0.0573068	1
1700064H15Rik	-3.36606e-16	0.0697506	0.209959	0.0391518	0.0436795	0.0436795	-8.59745e-15	1.59687	4.8068	1	0.110811	1.93283e-06	0.0575751	1
Aldoa	3.19798e-17	0.168065	0.205463	0.0383275	0.0427599	0.0427599	8.34384e-16	3.93043	4.80503	1	9.44872e-05	1.94934e-06	0.0580649	1
Hpcal4	-3.22885e-17	0.379656	0.187784	0.0351839	0.0392527	0.0392527	-9.17708e-16	9.6721	4.78397	1	1.09977e-20	2.15706e-06	0.0642503	3.28436e-16
Arpp21	-1.07108e-17	0.136179	0.205969	0.0386506	0.0431203	0.0431203	-2.77119e-16	3.15811	4.77661	1	0.00166627	2.23453e-06	0.0665556	1
Sfpq	-4.03145e-16	0.152338	-0.211042	0.0396198	0.0442016	0.0442016	-1.01754e-14	3.44645	-4.77454	1	0.000606986	2.25683e-06	0.0672174	1
L1Lx_I	1.64633e-15	0.0714991	-0.211239	0.0396805	0.0442693	0.0442693	4.14896e-14	1.61509	-4.77167	1	0.106807	2.288e-06	0.0681435	1
Homer3	5.2582e-16	-0.150468	0.210924	0.039625	0.0442074	0.0442074	1.32699e-14	-3.40368	4.77124	1	0.000708356	2.29274e-06	0.0682823	1
Pot1b	9.79863e-17	-0.174694	-0.203525	0.0382766	0.0427031	0.0427031	2.55995e-15	-4.09091	-4.76605	1	4.87287e-05	2.35036e-06	0.0699962	1
Zfp536	3.11191e-16	-0.00923097	-0.209593	0.0394878	0.0440543	0.0440543	7.88071e-15	-0.209536	-4.7576	1	0.8341	2.4472e-06	0.0728775	1
Sccpdh	5.46638e-17	-0.0846822	-0.206891	0.0390773	0.0435964	0.0435964	1.39886e-15	-1.94241	-4.7456	1	0.0525461	2.59138e-06	0.0771687	1
HAL1-1D_Cpo	-3.60009e-15	0.104448	-0.210032	0.0396959	0.0442865	0.0442865	-9.06917e-14	2.35845	-4.74258	1	0.0186654	2.62894e-06	0.0782846	1
4930480K15Rik	2.59323e-16	-0.0952193	-0.20623	0.0390042	0.0435148	0.0435148	6.64859e-15	-2.1882	-4.73931	1	0.0290328	2.67012e-06	0.079508	1
Cdc42bpa	2.05473e-16	0.0173489	-0.2091	0.0395891	0.0441674	0.0441674	5.19013e-15	0.3928	-4.73426	1	0.694604	2.73505e-06	0.0814389	1
Slc32a1	-3.84658e-17	-0.135	-0.204153	0.0386822	0.0431556	0.0431556	-9.94404e-16	-3.12821	-4.73064	1	0.00184247	2.7826e-06	0.082852	1
Ssbp3	-9.93854e-18	0.178877	0.201761	0.0382502	0.0426736	0.0426736	-2.5983e-16	4.19175	4.728	1	3.1772e-05	2.81764e-06	0.0838924	0.910903
B2_Rn2	-2.70261e-16	0.196024	0.200716	0.03806	0.0424614	0.0424614	-7.10093e-15	4.61652	4.72702	1	4.75908e-06	2.83082e-06	0.0842819	0.138132
Nap1l5	6.94123e-16	-0.0948984	-0.205052	0.0390189	0.0435312	0.0435312	1.77894e-14	-2.18001	-4.71046	1	0.0296379	3.06204e-06	0.0911631	1
A830082K12Rik	3.95838e-17	-0.163816	-0.201096	0.0384252	0.0428689	0.0428689	1.03015e-15	-3.82132	-4.69095	1	0.000146324	3.3579e-06	0.0999681	1
Shisa4	-3.31716e-16	-0.00012504	0.206734	0.0395499	0.0441237	0.0441237	-8.38726e-15	-0.00283386	4.68533	1	0.99774	3.44806e-06	0.102649	1
Cntn6	-5.05421e-16	-0.145636	-0.201669	0.0386066	0.0430712	0.0430712	-1.30916e-14	-3.38128	-4.68223	1	0.000767538	3.49877e-06	0.104155	1
L1MdN_I	1.30509e-15	0.0780362	-0.206741	0.0397178	0.0443109	0.0443109	3.28591e-14	1.76111	-4.66569	1	0.0787205	3.78169e-06	0.112573	1
Chl1	3.39639e-16	-0.122556	-0.201357	0.0388274	0.0433176	0.0433176	8.74741e-15	-2.82924	-4.64839	1	0.00481906	4.10135e-06	0.122085	1
Rnf112	-6.11594e-17	-0.0566234	0.205582	0.0397053	0.0442969	0.0442969	-1.54033e-15	-1.27827	4.64099	1	0.20164	4.24572e-06	0.126378	1
Brap	7.57046e-17	0.110904	0.201162	0.0389302	0.0434322	0.0434322	1.94463e-15	2.55348	4.63164	1	0.0109068	4.43532e-06	0.132017	1
Zcchc11	-6.38854e-17	-0.0733538	-0.202512	0.0392013	0.0437347	0.0437347	-1.62968e-15	-1.67725	-4.63047	1	0.0940057	4.45946e-06	0.132731	1
NICER_RN	-3.19092e-15	0.0869847	-0.205189	0.0397317	0.0443265	0.0443265	-8.03117e-14	1.96236	-4.62905	1	0.0501736	4.48917e-06	0.133611	1
Penk	-3.80463e-16	-0.0786771	-0.202164	0.039168	0.0436975	0.0436975	-9.71362e-15	-1.80049	-4.62644	1	0.0722757	4.54414e-06	0.135243	1
Resp18	1.12981e-16	-0.190855	-0.196715	0.0381711	0.0425853	0.0425853	2.95987e-15	-4.4817	-4.61932	1	8.84259e-06	4.69748e-06	0.139802	0.255931
Rif1	2.6341e-16	-0.0896137	-0.201437	0.0390961	0.0436173	0.0436173	6.73749e-15	-2.05454	-4.61828	1	0.0403478	4.72015e-06	0.140472	1
Mir99ahg	1.3401e-16	-0.263533	-0.19181	0.0372479	0.0415554	0.0415554	3.59778e-15	-6.34174	-4.61577	1	4.42062e-10	4.77558e-06	0.142116	1.31094e-05
Rbfox1	3.6119e-16	0.0323269	0.20209	0.0394477	0.0440096	0.0440096	9.15617e-15	0.734542	4.59195	1	0.4629	5.33408e-06	0.158732	1
Tgfb2	4.62843e-16	0.118693	0.198905	0.0388875	0.0433846	0.0433846	1.19021e-14	2.73582	4.5847	1	0.00640319	5.51625e-06	0.164147	1
Gfpt2	4.36787e-16	-0.0989941	-0.199102	0.039048	0.0435637	0.0435637	1.11859e-14	-2.2724	-4.57037	1	0.023409	5.8938e-06	0.175376	1
Tenm3	-1.14074e-16	-0.083939	-0.199629	0.0391557	0.0436838	0.0436838	-2.91334e-15	-1.92151	-4.56986	1	0.0551321	5.90767e-06	0.175783	1
Rprml	-1.0581e-15	0.109082	0.198039	0.0389779	0.0434854	0.0434854	-2.71463e-14	2.50848	4.55415	1	0.0123833	6.35107e-06	0.18897	1
Thy1	1.76381e-17	-0.114963	-0.19778	0.0389313	0.0434335	0.0434335	4.53057e-16	-2.64688	-4.55363	1	0.00833335	6.36609e-06	0.18941	1
Nrxn3	1.85189e-16	0.0326576	-0.201428	0.039692	0.0442822	0.0442822	4.66564e-15	0.737489	-4.54874	1	0.461108	6.51093e-06	0.193713	1
Pcdh10	-1.60172e-17	-0.144563	-0.196098	0.0386791	0.0431522	0.0431522	-4.14104e-16	-3.35008	-4.54435	1	0.000857659	6.64362e-06	0.197654	1
Nbeal1	-9.15893e-17	-0.161576	-0.1943	0.0385268	0.0429822	0.0429822	-2.37729e-15	-3.75913	-4.52047	1	0.000186868	7.41146e-06	0.220491	1
4930555F03Rik	-5.87263e-17	-0.103437	-0.196542	0.0390389	0.0435535	0.0435535	-1.5043e-15	-2.37493	-4.51266	1	0.0178598	7.68082e-06	0.228497	1
L1MB6_5	-1.2723e-15	0.0714362	-0.200107	0.0397602	0.0443582	0.0443582	-3.19993e-14	1.61044	-4.51117	1	0.107818	7.73322e-06	0.230048	1
Pclo	1.35718e-16	-0.17268	-0.193255	0.0384195	0.0428625	0.0428625	3.53254e-15	-4.02869	-4.50872	1	6.316e-05	7.82003e-06	0.232622	1
Epha7	-2.30023e-16	0.335701	0.181866	0.0361614	0.0403432	0.0403432	-6.36103e-15	8.32112	4.50798	1	5.70075e-16	7.84651e-06	0.233402	1.69991e-11
Kcnip1	7.22338e-16	-0.0925497	-0.19674	0.0391211	0.0436452	0.0436452	1.84642e-14	-2.1205	-4.50771	1	0.0343662	7.85606e-06	0.233678	1
Tcf4	8.82467e-18	-0.383078	-0.177324	0.0352808	0.0393608	0.0393608	2.50127e-16	-9.73247	-4.5051	1	6.58547e-21	7.95026e-06	0.236473	1.96682e-16
Gm28661	7.42269e-17	0.0471982	-0.199136	0.0397383	0.0443338	0.0443338	1.86789e-15	1.06461	-4.49175	1	0.287473	8.44803e-06	0.25127	1
Arhgap12	-4.79819e-16	-0.150357	-0.193628	0.0386491	0.0431186	0.0431186	-1.24147e-14	-3.48706	-4.4906	1	0.000523419	8.49253e-06	0.252585	1
Gm4117	4.27536e-16	-0.236134	-0.188349	0.0376921	0.0420509	0.0420509	1.13429e-14	-5.61543	-4.47907	1	2.97876e-08	8.94858e-06	0.26614	0.000878436
Apc	-4.38013e-16	-0.217277	-0.188939	0.0379374	0.0423246	0.0423246	-1.15457e-14	-5.13359	-4.46404	1	3.82601e-07	9.57897e-06	0.284879	0.0112213
Pisd	1.04454e-16	-0.108196	-0.194094	0.0390254	0.0435385	0.0435385	2.67655e-15	-2.48506	-4.45798	1	0.0132195	9.84488e-06	0.292777	1
RLTR35_MM	-1.93425e-15	0.0982273	-0.197393	0.0397814	0.0443819	0.0443819	-4.86218e-14	2.21323	-4.44761	1	0.0272507	1.03167e-05	0.306797	1
Wbscr17	-3.78965e-17	0.168152	0.190786	0.0384966	0.0429485	0.0429485	-9.8441e-16	3.9152	4.44221	1	0.000100501	1.05708e-05	0.314344	1
Grid2	-6.52215e-16	-0.0295942	-0.195716	0.0395172	0.0440872	0.0440872	-1.65046e-14	-0.671266	-4.43929	1	0.502305	1.07105e-05	0.318489	1
B2_Rn1	-8.41969e-17	0.193649	0.18907	0.0382288	0.0426497	0.0426497	-2.20245e-15	4.54046	4.4331	1	6.76322e-06	1.1013e-05	0.327472	0.196045
Eif4a1	-1.22454e-16	0.26411	0.184531	0.0373363	0.041654	0.041654	-3.27977e-15	6.34056	4.43008	1	4.45247e-10	1.11632e-05	0.331927	1.32034e-05
Ndnl2	3.30981e-16	0.0719751	0.193624	0.0392956	0.04384	0.04384	8.42285e-15	1.64177	4.4166	1	0.101152	1.18592e-05	0.352611	1
Fbxw7	3.29129e-17	0.360485	0.17614	0.0357669	0.0399032	0.0399032	9.20205e-16	9.034	4.41418	1	2.15595e-18	1.19888e-05	0.356452	6.43574e-14
Gm13389	3.55914e-16	0.110227	0.191702	0.0390331	0.043547	0.043547	9.11827e-15	2.53123	4.40219	1	0.011616	1.26493e-05	0.376076	1
9930021J03Rik	3.20218e-16	0.0685186	-0.195302	0.039791	0.0443926	0.0443926	8.0475e-15	1.54347	-4.39942	1	0.123235	1.28064e-05	0.380735	1
Dusp11	-9.94502e-17	0.0305385	-0.19497	0.0397361	0.0443313	0.0443313	-2.50277e-15	0.68887	-4.39802	1	0.491167	1.2887e-05	0.383119	1
Gm12022	7.48424e-17	-0.1277	-0.190295	0.0388984	0.0433968	0.0433968	1.92405e-15	-2.94262	-4.38501	1	0.00337795	1.36567e-05	0.405986	1
Ccbe1	1.89327e-16	-0.180257	0.193586	0.039624	0.0442062	0.0442062	4.77809e-15	-4.07764	4.37916	1	5.15138e-05	1.40166e-05	0.416672	1
Pim1	-4.02682e-16	0.39286	0.17151	0.0351631	0.0392295	0.0392295	-1.14518e-14	10.0144	4.37196	1	5.82895e-22	1.44724e-05	0.430207	1.74134e-17
Fam19a1	-2.35226e-16	0.139704	0.189095	0.0388012	0.0432883	0.0432883	-6.06234e-15	3.2273	4.36826	1	0.00131651	1.47123e-05	0.437324	1
4930511M06Rik	-2.68723e-16	-0.147916	-0.188663	0.0387271	0.0432056	0.0432056	-6.9389e-15	-3.42353	-4.36663	1	0.000659485	1.48195e-05	0.440495	1
Camkk1	1.73018e-16	0.169286	0.187591	0.0385203	0.0429749	0.0429749	4.49162e-15	3.93918	4.36513	1	9.11906e-05	1.49184e-05	0.44342	1
Vstm5	-5.35293e-16	-0.0201093	-0.192425	0.0395884	0.0441666	0.0441666	-1.35214e-14	-0.455304	-4.35679	1	0.649052	1.54799e-05	0.460095	1
Spry2	-2.75179e-16	0.549029	0.152334	0.0313491	0.0349744	0.0349744	-8.7779e-15	15.698	4.35558	1	6.62945e-47	1.55629e-05	0.462544	1.9828e-42
L1VL2_5	3.9771e-15	0.0682794	-0.192237	0.0398114	0.0444154	0.0444154	9.98984e-14	1.53729	-4.32817	1	0.12474	1.75657e-05	0.522054	1
Atp2b1	3.23785e-16	0.251572	0.181346	0.0375628	0.0419068	0.0419068	8.61982e-15	6.00314	4.32736	1	3.32021e-09	1.76283e-05	0.523896	9.82516e-05
Cenpi	-4.20106e-17	-0.203099	-0.184252	0.0381718	0.0425861	0.0425861	-1.10057e-15	-4.76914	-4.32659	1	2.31586e-06	1.76884e-05	0.525664	0.0674471
CAVID2	3.03157e-15	0.0854065	-0.191982	0.0398187	0.0444235	0.0444235	7.61343e-14	1.92255	-4.32162	1	0.055001	1.8079e-05	0.537253	1
Myt1l	1.66491e-16	-0.142419	-0.186859	0.0387991	0.043286	0.043286	4.2911e-15	-3.29018	-4.31685	1	0.00105883	1.84624e-05	0.548629	1
Slc9a6	-1.22923e-15	-0.0926514	-0.188733	0.0391984	0.0437315	0.0437315	-3.13592e-14	-2.11864	-4.31573	1	0.0345236	1.85533e-05	0.55131	1
Galntl6	2.34286e-15	-0.048616	-0.189867	0.0394702	0.0440347	0.0440347	5.93577e-14	-1.10404	-4.31175	1	0.270012	1.88806e-05	0.561019	1
Grpr	-3.52601e-16	-0.110831	-0.187877	0.0390663	0.0435841	0.0435841	-9.02569e-15	-2.54292	-4.31068	1	0.0112384	1.89696e-05	0.563643	1
Gaa	-2.26765e-16	-0.182731	-0.184118	0.0384117	0.0428538	0.0428538	-5.90355e-15	-4.26405	-4.29643	1	2.32549e-05	2.01921e-05	0.599949	0.668487
Qpct	4.49202e-16	-0.101191	-0.187084	0.0391502	0.0436777	0.0436777	1.14738e-14	-2.31677	-4.28329	1	0.0208458	2.13852e-05	0.635376	1
Olr1	-3.87162e-16	0.198198	0.182632	0.0382497	0.042673	0.042673	-1.0122e-14	4.64457	4.27979	1	4.17532e-06	2.1714e-05	0.645124	0.121272
BC051077	2.9911e-16	0.0688119	0.187844	0.0393692	0.0439221	0.0439221	7.59756e-15	1.56668	4.27677	1	0.117707	2.20024e-05	0.65367	1
Gm10721	-5.55544e-17	-0.018292	-0.188962	0.0396247	0.044207	0.044207	-1.40202e-15	-0.413781	-4.27448	1	0.67918	2.22233e-05	0.660209	1
Chgb	-2.29811e-16	0.388689	0.168276	0.0353046	0.0393873	0.0393873	-6.50938e-15	9.86837	4.27233	1	2.0589e-21	2.2432e-05	0.666387	6.15013e-17
Ophn1	2.01414e-16	-0.135136	-0.184713	0.0388891	0.0433864	0.0433864	5.17919e-15	-3.1147	-4.25739	1	0.00192753	2.39374e-05	0.711084	1
Thsd7a	-5.22279e-16	0.0256404	-0.188738	0.0397706	0.0443699	0.0443699	-1.31323e-14	0.577879	-4.25375	1	0.563559	2.43187e-05	0.722387	1
1500026H17Rik	1.42441e-16	-0.012346	-0.187956	0.0396569	0.044243	0.044243	3.59184e-15	-0.279049	-4.24827	1	0.780302	2.49037e-05	0.739739	1
Akap5	-3.05512e-16	-0.250142	-0.178222	0.0376228	0.0419737	0.0419737	-8.12039e-15	-5.95949	-4.24603	1	4.27677e-09	2.51463e-05	0.746921	0.000126473
Grin2d	2.94351e-16	-0.106717	-0.185164	0.0391258	0.0436505	0.0436505	7.52319e-15	-2.4448	-4.24196	1	0.0147746	2.55939e-05	0.760189	1
Pde5a	8.8121e-17	-0.0583593	-0.186646	0.0394434	0.0440048	0.0440048	2.23412e-15	-1.3262	-4.24149	1	0.185268	2.5646e-05	0.761713	1
Slc12a5	-5.37387e-16	-0.0644711	-0.186264	0.0394103	0.0439679	0.0439679	-1.36357e-14	-1.46632	-4.23637	1	0.143075	2.62206e-05	0.778753	1
Rpia	-2.75258e-16	-0.0924881	-0.185405	0.0392312	0.0437681	0.0437681	-7.0163e-15	-2.11314	-4.23607	1	0.0349936	2.62542e-05	0.779724	1
Gm24048	-3.122e-16	-0.03651	-0.186923	0.0395584	0.0441331	0.0441331	-7.89212e-15	-0.82727	-4.23543	1	0.408407	2.63268e-05	0.781852	1
STR1	-1.72762e-15	0.0920364	-0.188147	0.0398412	0.0444486	0.0444486	-4.33626e-14	2.07063	-4.23291	1	0.038813	2.6616e-05	0.790414	1
L1M2C_5	4.05929e-15	0.0661864	-0.188125	0.039837	0.044444	0.044444	1.01897e-13	1.48921	-4.23286	1	0.136948	2.66206e-05	0.790526	1
9130230L23Rik	1.33894e-16	-0.150663	0.187612	0.0397518	0.0443489	0.0443489	3.36826e-15	-3.39722	4.23036	1	0.00072498	2.69107e-05	0.799114	1
Npas1	1.19552e-15	-0.147656	-0.182614	0.0387936	0.0432798	0.0432798	3.08176e-14	-3.41165	-4.21938	1	0.000688338	2.8216e-05	0.837845	1
Atp6v0a1	1.18924e-16	-0.0395023	-0.186172	0.0395499	0.0441236	0.0441236	3.00693e-15	-0.895265	-4.21932	1	0.370998	2.82225e-05	0.838011	1
Agbl4	-1.40686e-15	-0.0947904	-0.184519	0.0392227	0.0437586	0.0437586	-3.58686e-14	-2.16621	-4.21674	1	0.030681	2.85389e-05	0.847376	1
Clasp2	1.4154e-16	-0.548086	-0.147979	0.0314682	0.0351073	0.0351073	4.49789e-15	-15.6117	-4.21505	1	1.74515e-46	2.87464e-05	0.85351	5.2194e-42
Brinp3	3.01384e-17	-0.1062	-0.183993	0.0391412	0.0436677	0.0436677	7.69993e-16	-2.43201	-4.21348	1	0.0153015	2.89412e-05	0.859265	1
Cdh11	-2.78301e-15	-0.108208	-0.183755	0.0391277	0.0436526	0.0436526	-7.11263e-14	-2.47883	-4.20948	1	0.01345	2.94444e-05	0.874174	1
Htr3a	-1.03284e-15	-0.149669	-0.18205	0.0387801	0.0432647	0.0432647	-2.66332e-14	-3.45937	-4.20781	1	0.000579145	2.96564e-05	0.880441	1
Sult2b1	-5.93105e-16	0.418183	0.162912	0.0347347	0.0387516	0.0387516	-1.70753e-14	10.7914	4.204	1	5.71493e-25	3.0146e-05	0.894943	1.70796e-20
ID-Spe	-2.00707e-18	0.0419393	-0.186597	0.0398187	0.0444235	0.0444235	-5.04052e-17	0.944078	-4.20042	1	0.345503	3.06126e-05	0.908766	1
Trpc4	3.31188e-16	-0.124648	-0.182751	0.0390018	0.0435121	0.0435121	8.49161e-15	-2.86467	-4.2	1	0.00431785	3.06681e-05	0.910383	1
Srsf9	-1.16041e-16	-0.101841	0.186576	0.0398448	0.0444526	0.0444526	-2.91233e-15	-2.29099	4.19718	1	0.0223033	3.10413e-05	0.921431	1
Gm28437	5.14327e-17	0.0597274	-0.186366	0.0398433	0.0444509	0.0444509	1.29087e-15	1.34367	-4.19262	1	0.179554	3.16542e-05	0.939592	1
Rian	-1.51906e-16	0.000953252	-0.185766	0.0397223	0.044316	0.044316	-3.82419e-15	0.0215103	-4.19186	1	0.982846	3.1758e-05	0.942641	1
Gm10800	-1.21319e-16	0.0199766	-0.186009	0.0397766	0.0443765	0.0443765	-3.05001e-15	0.450163	-4.19162	1	0.652753	3.179e-05	0.943559	1
UCON56	-6.6893e-16	0.109542	-0.186154	0.0398398	0.0444471	0.0444471	-1.67905e-14	2.46454	-4.18823	1	0.013993	3.22555e-05	0.957343	1
Gm10222	6.1956e-16	0.0305877	-0.185941	0.0398018	0.0444047	0.0444047	1.55661e-14	0.688839	-4.18743	1	0.491186	3.23663e-05	0.960599	1
Txndc16	2.32541e-16	-0.0920813	-0.183323	0.0392537	0.0437931	0.0437931	5.92407e-15	-2.10264	-4.18612	1	0.0359055	3.25482e-05	0.965964	1
Nbea	-1.40198e-16	-0.104522	-0.182389	0.0391696	0.0436994	0.0436994	-3.57926e-15	-2.39185	-4.17372	1	0.0170652	3.43192e-05	1	1
UCON100	-8.56972e-16	0.105474	-0.185534	0.0398476	0.0444557	0.0444557	-2.15062e-14	2.37256	-4.17347	1	0.0179739	3.43566e-05	1	1
Ylpm1	1.25273e-16	-0.234412	-0.176219	0.0378658	0.0422447	0.0422447	3.30833e-15	-5.54891	-4.17138	1	4.28662e-08	3.46645e-05	1	0.0012634
Gm26737	-4.68619e-17	-0.00394508	0.18491	0.0397386	0.0443341	0.0443341	-1.17926e-15	-0.0889853	4.17084	1	0.929123	3.47439e-05	1	1
Dner	-6.95235e-16	-0.138091	-0.180997	0.0389001	0.0433986	0.0433986	-1.78723e-14	-3.18191	-4.17056	1	0.00153728	3.47857e-05	1	1
Tmem178	5.95457e-16	0.220622	0.176559	0.0380431	0.0424425	0.0424425	1.56522e-14	5.19813	4.15996	1	2.74882e-07	3.63935e-05	1	0.00807054
Tymp	-4.08158e-16	-0.128887	0.184742	0.0398179	0.0444227	0.0444227	-1.02506e-14	-2.90138	4.15873	1	0.00384906	3.65837e-05	1	1
Lrrtm2	-4.14904e-16	-0.0990284	-0.181943	0.0392156	0.0437506	0.0437506	-1.05801e-14	-2.26347	-4.15865	1	0.0239566	3.65969e-05	1	1
1500004A13Rik	1.95277e-16	-0.149532	-0.179956	0.0388032	0.0432905	0.0432905	5.03251e-15	-3.45416	-4.15693	1	0.000590217	3.68655e-05	1	1
Cd84	4.55198e-17	-0.110977	-0.181321	0.0391292	0.0436542	0.0436542	1.16332e-15	-2.54217	-4.15358	1	0.0112623	3.73941e-05	1	1
Gm3272	4.24446e-16	0.238553	0.175164	0.0378224	0.0421963	0.0421963	1.12221e-14	5.6534	4.15117	1	2.41596e-08	3.77794e-05	1	0.000712634
Wnt5a	8.06987e-16	-0.101958	-0.181289	0.0391997	0.0437329	0.0437329	2.05866e-14	-2.33139	-4.14536	1	0.0200572	3.87233e-05	1	1
Gm6480	-1.79906e-16	-0.153246	-0.179266	0.0387742	0.0432582	0.0432582	-4.63982e-15	-3.54259	-4.14408	1	0.000426441	3.89342e-05	1	1
Erdr1	-2.22536e-17	0.0592725	0.182054	0.039478	0.0440435	0.0440435	-5.63696e-16	1.34577	4.1335	1	0.178875	4.07195e-05	1	1
Gm7461	2.73014e-15	-0.14465	-0.178977	0.0388597	0.0433536	0.0433536	7.02561e-14	-3.33651	-4.12831	1	0.00089983	4.16239e-05	1	1
Napa	-2.39117e-16	0.0491101	0.181647	0.0395381	0.0441104	0.0441104	-6.04777e-15	1.11335	4.118	1	0.265998	4.34773e-05	1	1
Baiap2	-1.64505e-16	0.382926	0.163068	0.0355074	0.0396136	0.0396136	-4.63299e-15	9.66653	4.11647	1	1.15291e-20	4.37588e-05	1	3.44292e-16
Gm14293	-3.387e-17	-0.0615569	0.182747	0.0398683	0.0444788	0.0444788	-8.49549e-16	-1.38396	4.10863	1	0.166876	4.52291e-05	1	1
Ktn1	-8.67438e-17	-0.219478	-0.1745	0.0380818	0.0424857	0.0424857	-2.27783e-15	-5.16593	-4.10726	1	3.24326e-07	4.54917e-05	1	0.00951896
Thrb	-6.47814e-16	-0.0770589	-0.179924	0.0393875	0.0439424	0.0439424	-1.64472e-14	-1.75363	-4.09454	1	0.0799948	4.79908e-05	1	1
Rfwd2	-2.20371e-16	0.38929	0.161549	0.0353965	0.0394899	0.0394899	-6.2258e-15	9.85797	4.0909	1	2.25151e-21	4.87298e-05	1	6.72525e-17
Cul9	-3.13364e-16	0.0889424	0.178978	0.0393159	0.0438626	0.0438626	-7.97042e-15	2.02775	4.08044	1	0.043019	5.09151e-05	1	1
Tmc5	-1.45407e-16	0.0793253	-0.181404	0.0398839	0.0444962	0.0444962	-3.64575e-15	1.78274	-4.07685	1	0.0751246	5.16857e-05	1	1
Gm14340	-4.65714e-16	-0.0906557	-0.178728	0.0393061	0.0438517	0.0438517	-1.18484e-14	-2.06733	-4.07574	1	0.039124	5.19262e-05	1	1
Rab3gap1	7.377e-17	-0.0871628	-0.178816	0.0393297	0.043878	0.043878	1.87568e-15	-1.98648	-4.07529	1	0.0474261	5.2023e-05	1	1
Ankrd44	-1.85429e-16	-0.0755399	-0.179127	0.0394043	0.0439612	0.0439612	-4.7058e-15	-1.71833	-4.07467	1	0.086243	5.21593e-05	1	1
Hcrtr2	-2.31763e-16	-0.0457154	-0.179541	0.0395734	0.0441499	0.0441499	-5.85652e-15	-1.03546	-4.06662	1	0.300864	5.39427e-05	1	1
Smarca1	5.86687e-17	-0.106849	-0.177802	0.039195	0.0437277	0.0437277	1.49684e-15	-2.4435	-4.06612	1	0.0148274	5.40552e-05	1	1
Pcgf2	3.52109e-16	0.143602	0.176355	0.0388961	0.0433943	0.0433943	9.05255e-15	3.30923	4.06403	1	0.000990543	5.45307e-05	1	1
Usp34	1.15987e-16	0.0743395	-0.180719	0.0398873	0.0445001	0.0445001	2.90787e-15	1.67055	-4.0611	1	0.0953234	5.52005e-05	1	1
AA465934	-8.15603e-16	-0.0726611	-0.17861	0.0394272	0.0439867	0.0439867	-2.06863e-14	-1.65189	-4.06055	1	0.099071	5.5327e-05	1	1
Gm28417	1.45086e-16	-0.0135447	0.180294	0.0398009	0.0444036	0.0444036	3.64531e-15	-0.305036	4.06034	1	0.760443	5.53757e-05	1	1
A330023F24Rik	3.6246e-16	0.0252819	-0.180385	0.0398292	0.0444353	0.0444353	9.10036e-15	0.56896	-4.0595	1	0.569593	5.55688e-05	1	1
L1-2_Dor	1.36411e-15	0.0979585	-0.180538	0.0398823	0.0444944	0.0444944	3.42035e-14	2.20159	-4.05754	1	0.0280674	5.60246e-05	1	1
Nptxr	4.31638e-17	0.189878	0.173892	0.0384447	0.0428906	0.0428906	1.12275e-15	4.42703	4.05432	1	1.13171e-05	5.67826e-05	1	0.327109
L1MdTf_III	-2.67599e-16	0.0519259	-0.180337	0.0398745	0.0444857	0.0444857	-6.71104e-15	1.16725	-4.05382	1	0.243565	5.69009e-05	1	1
MER53	-4.18545e-16	0.0632202	-0.18035	0.0398846	0.044497	0.044497	-1.04939e-14	1.42077	-4.05307	1	0.155893	5.70782e-05	1	1
91ES8_RN	1.06659e-15	0.10904	-0.180126	0.0398737	0.0444849	0.0444849	2.67492e-14	2.45116	-4.04915	1	0.0145186	5.80169e-05	1	1
Cog5	-1.41924e-15	-0.139923	-0.17538	0.0389398	0.043443	0.043443	-3.6447e-14	-3.22083	-4.03702	1	0.00134605	6.1017e-05	1	1
Gm24601	-1.47139e-16	-0.240822	-0.170377	0.037849	0.042226	0.042226	-3.88752e-15	-5.70316	-4.03489	1	1.83282e-08	6.1559e-05	1	0.000541068
Arhgap5	-4.2415e-17	-0.000173721	-0.178815	0.0397706	0.0443699	0.0443699	-1.06649e-15	-0.00391529	-4.0301	1	0.996877	6.27939e-05	1	1
Dlg1	-7.05868e-17	-0.127051	0.179163	0.0398502	0.0444587	0.0444587	-1.7713e-15	-2.85773	4.02988	1	0.00441212	6.285e-05	1	1
Brip1os	2.16814e-17	0.106619	0.176279	0.039211	0.0437456	0.0437456	5.5294e-16	2.43725	4.02965	1	0.0150837	6.29096e-05	1	1
Hic2	-7.11156e-17	0.0229366	-0.178738	0.0398353	0.0444421	0.0444421	-1.78524e-15	0.516101	-4.02183	1	0.605971	6.49808e-05	1	1
Mtfr1	-7.18891e-16	-0.032307	-0.177732	0.0396533	0.044239	0.044239	-1.81294e-14	-0.730284	-4.01755	1	0.465497	6.61409e-05	1	1
Alpk2	1.52307e-16	-0.07417	0.17866	0.0398997	0.0445139	0.0445139	3.81725e-15	-1.66622	4.01358	1	0.0961818	6.72339e-05	1	1
Dlx2	7.70468e-16	-0.0748107	-0.17647	0.0394322	0.0439923	0.0439923	1.95391e-14	-1.70054	-4.01139	1	0.0895382	6.78444e-05	1	1
Fam65b	-2.50377e-16	-0.18429	-0.172139	0.0385262	0.0429816	0.0429816	-6.49888e-15	-4.28766	-4.00495	1	2.09809e-05	6.96709e-05	1	0.603641
Plk2	5.91825e-17	0.575122	0.137572	0.0307952	0.0343565	0.0343565	1.92181e-15	16.7398	4.00426	1	4.71469e-52	6.98693e-05	1	1.41031e-47
Zfp488	-8.92489e-17	-0.12021	-0.174571	0.0391188	0.0436427	0.0436427	-2.28148e-15	-2.75442	-4	1	0.00605472	7.11057e-05	1	1
Rsrp1	1.14937e-16	-0.209802	0.176507	0.0395555	0.0441299	0.0441299	2.90572e-15	-4.75419	3.99972	1	2.48738e-06	7.11872e-05	1	0.0724202
Gm11713	-2.54188e-16	0.00937448	-0.177552	0.0398088	0.0444125	0.0444125	-6.38521e-15	0.211078	-3.9978	1	0.832897	7.17529e-05	1	1
Alcam	-4.1743e-16	-0.142151	-0.173225	0.0389408	0.0434441	0.0434441	-1.07196e-14	-3.27204	-3.98731	1	0.0011279	7.4914e-05	1	1
Stxbp4	7.55386e-17	-0.084129	-0.174952	0.0393848	0.0439394	0.0439394	1.91796e-15	-1.91466	-3.98166	1	0.0560027	7.66716e-05	1	1
Gm15958	2.83005e-16	-0.156544	0.176692	0.0397855	0.0443864	0.0443864	7.11329e-15	-3.52684	3.98077	1	0.000452082	7.69503e-05	1	1
Eml1	1.37807e-17	-0.039325	-0.175908	0.0396348	0.0442183	0.0442183	3.47693e-16	-0.889336	-3.97816	1	0.374172	7.77791e-05	1	1
Amigo2	2.23955e-17	-0.137345	0.1768	0.0398392	0.0444464	0.0444464	5.62147e-16	-3.09012	3.97783	1	0.00209172	7.78838e-05	1	1
A730017L22Rik	3.48956e-16	-0.156948	-0.172226	0.0388104	0.0432986	0.0432986	8.99131e-15	-3.62479	-3.97763	1	0.000313289	7.79474e-05	1	1
Lrrc17	3.48878e-16	-0.179261	-0.171114	0.0385921	0.043055	0.043055	9.04014e-15	-4.16353	-3.97431	1	3.58438e-05	7.90164e-05	1	1
2610044O15Rik8	7.46345e-17	-0.230894	-0.168432	0.0380049	0.0423999	0.0423999	1.96381e-15	-5.44562	-3.97245	1	7.48883e-08	7.96193e-05	1	0.00220508
Etl4	-5.46348e-16	-0.126793	-0.173085	0.0390779	0.0435971	0.0435971	-1.3981e-14	-2.90828	-3.97012	1	0.00376621	8.03836e-05	1	1
B2_Rat1	-2.11392e-16	0.184045	0.170683	0.0385446	0.043002	0.043002	-5.48436e-15	4.2799	3.96918	1	2.17035e-05	8.06931e-05	1	0.624257
5330416C01Rik	1.17674e-16	-0.140179	0.176183	0.0398351	0.0444417	0.0444417	2.95403e-15	-3.15422	3.96436	1	0.00168828	8.22963e-05	1	1
Olfm3	3.39783e-16	-0.0106602	-0.17574	0.0397573	0.0443549	0.0443549	8.54644e-15	-0.240339	-3.96214	1	0.810148	8.30486e-05	1	1
Gm22904	-2.27822e-16	0.131055	0.172583	0.0390461	0.0435616	0.0435616	-5.83468e-15	3.0085	3.96181	1	0.00273343	8.3158e-05	1	1
Srsf1	4.94154e-17	-0.00142418	-0.17562	0.0397899	0.0443914	0.0443914	1.24191e-15	-0.0320823	-3.95618	1	0.974417	8.50932e-05	1	1
Peg3	1.64848e-16	-0.11403	-0.172894	0.0391846	0.0437161	0.0437161	4.20697e-15	-2.60842	-3.95492	1	0.00931868	8.55308e-05	1	1
Gprasp2	-1.0387e-15	-0.151812	-0.171452	0.038868	0.0433628	0.0433628	-2.67237e-14	-3.50097	-3.95389	1	0.000497354	8.5891e-05	1	1
Grm7	-7.50583e-17	0.160821	0.170902	0.0387856	0.0432709	0.0432709	-1.93521e-15	3.7166	3.94959	1	0.00022046	8.74086e-05	1	1
Fam227a	4.92215e-16	-0.146646	-0.171472	0.0389166	0.0434171	0.0434171	1.2648e-14	-3.3776	-3.94941	1	0.000777674	8.74721e-05	1	1
Ccnt2	4.71076e-16	0.225375	0.167682	0.0380852	0.0424895	0.0424895	1.2369e-14	5.30424	3.94643	1	1.58401e-07	8.854e-05	1	0.00465618
Dnm3	1.33789e-16	-0.162191	-0.170443	0.0387766	0.0432609	0.0432609	3.45024e-15	-3.74915	-3.93988	1	0.00019429	9.09314e-05	1	1
Vmn1r58	-4.40428e-16	-0.159668	-0.170541	0.0388007	0.0432878	0.0432878	-1.1351e-14	-3.68854	-3.93971	1	0.000245654	9.09934e-05	1	1
Slc24a3	-6.05819e-16	-0.145127	-0.171043	0.038935	0.0434376	0.0434376	-1.55598e-14	-3.34104	-3.93767	1	0.000885544	9.17515e-05	1	1
Nav2	1.20464e-16	-0.256707	-0.165527	0.0376854	0.0420435	0.0420435	3.19656e-15	-6.10577	-3.93704	1	1.81966e-09	9.19883e-05	1	5.3893e-05
C430042M11Rik	1.05285e-16	-0.00411448	-0.174574	0.0397886	0.0443899	0.0443899	2.64611e-15	-0.0926895	-3.93275	1	0.926181	9.36045e-05	1	1
Kifap3	2.81313e-16	-0.192301	-0.168758	0.038473	0.0429222	0.0429222	7.31196e-15	-4.48022	-3.93171	1	8.90212e-06	9.39993e-05	1	0.257627
Eif1a	9.26977e-16	-0.067517	0.174965	0.0399197	0.0445362	0.0445362	2.3221e-14	-1.516	3.92859	1	0.130036	9.51943e-05	1	1
Gm26870	-7.00326e-17	-0.0461014	-0.173448	0.0396209	0.0442029	0.0442029	-1.76757e-15	-1.04295	-3.92391	1	0.297384	9.70196e-05	1	1
Pisd-ps2	-1.04055e-16	-0.152087	-0.169838	0.0388815	0.0433779	0.0433779	-2.67622e-15	-3.5061	-3.91531	1	0.000488054	0.000100454	1	1
Gm28989	-3.01459e-16	-0.111289	-0.171152	0.0392223	0.0437581	0.0437581	-7.6859e-15	-2.54327	-3.91131	1	0.0112273	0.00010209	1	1
Gm13613	-5.55401e-16	-0.148181	-0.169789	0.0389189	0.0434196	0.0434196	-1.42707e-14	-3.41276	-3.91041	1	0.000685592	0.000102462	1	1
Hist1h2ap	-1.15896e-16	-0.0537943	-0.172608	0.0395876	0.0441656	0.0441656	-2.92758e-15	-1.21801	-3.9082	1	0.223689	0.000103383	1	1
Huwe1	-4.4487e-17	-0.052397	-0.172175	0.0395985	0.0441779	0.0441779	-1.12345e-15	-1.18605	-3.89731	1	0.236065	0.000108023	1	1
Cxadr	6.17572e-16	-0.0566122	-0.172033	0.039577	0.0441538	0.0441538	1.56043e-14	-1.28216	-3.89621	1	0.200274	0.000108501	1	1
Cep70	1.25412e-16	-0.318872	-0.159632	0.0367792	0.0410325	0.0410325	3.40987e-15	-7.77122	-3.89038	1	3.30564e-14	0.000111079	1	9.84915e-10
Omg	-1.07776e-15	-0.201251	-0.166434	0.0383951	0.0428353	0.0428353	-2.80702e-14	-4.69825	-3.88544	1	3.24415e-06	0.000113305	1	0.0943464
Grik2	1.716e-16	-0.253527	-0.163504	0.0377548	0.0421209	0.0421209	4.54512e-15	-6.01901	-3.88178	1	3.02693e-09	0.00011498	1	8.95852e-05
LX5	6.35335e-17	0.023273	-0.172648	0.0398774	0.044489	0.044489	1.59322e-15	0.523117	-3.88068	1	0.601082	0.000115488	1	1
Kmt2a	-5.54416e-17	-0.19577	-0.166338	0.0384596	0.0429072	0.0429072	-1.44156e-15	-4.56263	-3.8767	1	6.10784e-06	0.000117346	1	0.177134
Ercc6l	8.76562e-16	-0.0446453	-0.171394	0.0396445	0.0442292	0.0442292	2.21105e-14	-1.00941	-3.87514	1	0.313178	0.000118086	1	1
Gm10717	-4.87283e-16	-0.118376	-0.169385	0.0391824	0.0437136	0.0437136	-1.24363e-14	-2.70799	-3.87489	1	0.00695881	0.000118205	1	1
Cd34	2.87569e-16	-0.149066	-0.168125	0.038927	0.0434287	0.0434287	7.3874e-15	-3.43243	-3.87128	1	0.000638619	0.000119925	1	1
Sall1	6.60272e-16	-0.0560386	-0.170803	0.0395901	0.0441684	0.0441684	1.66777e-14	-1.26875	-3.86708	1	0.205014	0.000121959	1	1
Kif21a	-1.55519e-16	-0.260636	-0.162436	0.0376662	0.0420221	0.0420221	-4.12888e-15	-6.20235	-3.86548	1	1.02524e-09	0.000122741	1	3.03808e-05
Vps13c	-6.37971e-16	-0.0112843	-0.171263	0.0397878	0.044389	0.044389	-1.60343e-14	-0.254214	-3.85822	1	0.799416	0.000126355	1	1
Taco1	3.79742e-16	-0.0640757	0.171621	0.0399379	0.0445565	0.0445565	9.50831e-15	-1.43808	3.85177	1	0.150924	0.000129649	1	1
Gm11851	1.8015e-16	-0.122897	-0.16819	0.0391567	0.0436849	0.0436849	4.60075e-15	-2.81325	-3.85006	1	0.00506207	0.000130535	1	1
Abhd5	-4.55902e-17	-0.205842	-0.164748	0.0383594	0.0427954	0.0427954	-1.1885e-15	-4.80992	-3.84967	1	1.90399e-06	0.000130738	1	0.0554918
Lrrtm3	-2.56147e-16	-0.06284	-0.169861	0.0395599	0.0441347	0.0441347	-6.47492e-15	-1.42382	-3.84869	1	0.155008	0.000131249	1	1
Dpp10	1.91752e-16	-0.228886	-0.16349	0.0380878	0.0424924	0.0424924	5.03448e-15	-5.38652	-3.84751	1	1.02632e-07	0.000131865	1	0.00302006
Cfl1	-1.41424e-16	0.201636	0.164822	0.0384081	0.0428498	0.0428498	-3.68213e-15	4.70565	3.8465	1	3.13253e-06	0.0001324	1	0.0911222
Nop56	9.59267e-17	-0.103837	0.171241	0.0399267	0.044544	0.044544	2.40257e-15	-2.33112	3.8443	1	0.0200713	0.000133562	1	1
Gm20594	-3.1795e-16	0.0310453	-0.171121	0.0399029	0.0445175	0.0445175	-7.96809e-15	0.697374	-3.8439	1	0.485834	0.000133775	1	1
Usp13	8.81136e-17	-0.0116096	-0.170607	0.0397914	0.044393	0.044393	2.21439e-15	-0.261519	-3.84309	1	0.793781	0.000134206	1	1
Bri3bp	7.27902e-18	-0.107135	-0.168125	0.0392816	0.0438243	0.0438243	1.85304e-16	-2.44465	-3.83635	1	0.0147807	0.000137854	1	1
Bzrap1	-2.44037e-16	-0.275047	-0.16027	0.0374801	0.0418144	0.0418144	-6.51111e-15	-6.5778	-3.83289	1	1.0266e-10	0.000139764	1	3.04878e-06
B2_Rn	1.56542e-16	0.193189	0.164585	0.0385076	0.0429608	0.0429608	4.06521e-15	4.49687	3.83104	1	8.25386e-06	0.000140791	1	0.239032
Gm16892	4.15664e-16	-0.251373	-0.161546	0.0378082	0.0421805	0.0421805	1.0994e-14	-5.95945	-3.82987	1	4.27776e-09	0.000141447	1	0.000126498
Lmo4	-2.21834e-16	0.00858123	0.170046	0.039806	0.0444094	0.0444094	-5.57287e-15	0.19323	3.82905	1	0.846843	0.00014191	1	1
Epha4	3.73918e-17	0.202371	0.163964	0.0384088	0.0428505	0.0428505	9.73523e-16	4.72271	3.82641	1	2.88929e-06	0.000143401	1	0.0840725
Sema4a	1.70027e-16	-0.0682411	0.170484	0.0399462	0.0445657	0.0445657	4.25642e-15	-1.53125	3.82545	1	0.126226	0.00014395	1	1
Dctn5	7.55853e-17	-0.161806	0.169805	0.0397967	0.044399	0.044399	1.89928e-15	-3.64437	3.82453	1	0.000290851	0.000144476	1	1
Rims3	1.16207e-15	-0.102514	-0.167747	0.0393194	0.0438664	0.0438664	2.95547e-14	-2.33696	-3.82405	1	0.0197633	0.000144747	1	1
B3A	1.87482e-16	0.162842	0.16561	0.0388189	0.0433081	0.0433081	4.82965e-15	3.76008	3.824	1	0.000186176	0.000144778	1	1
Gm10698	-2.34314e-17	0.00370943	0.169748	0.0398244	0.0444298	0.0444298	-5.88368e-16	0.0834897	3.82058	1	0.933489	0.000146753	1	1
Vstm2l	-2.90696e-15	-0.0677036	-0.16854	0.0395425	0.0441154	0.0441154	-7.35147e-14	-1.53469	-3.82043	1	0.125377	0.00014684	1	1
A230006K03Rik	-2.69235e-16	-0.323018	-0.156501	0.0367489	0.0409987	0.0409987	-7.32634e-15	-7.87873	-3.81721	1	1.52031e-14	0.000148723	1	4.53128e-10
CAVID	2.20307e-15	0.0948769	-0.170011	0.0399418	0.0445609	0.0445609	5.51569e-14	2.12915	-3.81525	1	0.033641	0.000149881	1	1
Snca	1.0602e-16	0.053589	0.168518	0.0396215	0.0442034	0.0442034	2.67582e-15	1.21233	3.81233	1	0.225856	0.000151624	1	1
Dlx6	3.58255e-17	-0.0122075	-0.169199	0.0397994	0.044402	0.044402	9.00151e-16	-0.274931	-3.81062	1	0.783462	0.000152652	1	1
Adamts9	-1.33219e-16	-0.160664	0.169176	0.0398033	0.0444063	0.0444063	-3.34694e-15	-3.61804	3.80972	1	0.000321392	0.000153192	1	1
1700034H15Rik	-2.62568e-16	-0.0381105	-0.168439	0.0396988	0.0442897	0.0442897	-6.61402e-15	-0.860483	-3.80313	1	0.389861	0.000157232	1	1
Kif3a	2.22421e-16	-0.232745	-0.16142	0.0380612	0.0424627	0.0424627	5.84379e-15	-5.48116	-3.80146	1	6.18691e-08	0.000158268	1	0.00182242
Ankrd23	-2.15554e-16	-0.0478215	0.16931	0.0399388	0.0445575	0.0445575	-5.39711e-15	-1.07325	3.7998	1	0.283581	0.000159305	1	1
Kcnj9	4.59281e-17	-0.131645	-0.165654	0.0391069	0.0436293	0.0436293	1.17443e-15	-3.01736	-3.79686	1	0.00265599	0.000161166	1	1
Npas3	9.17868e-16	-0.117301	-0.165978	0.0392222	0.0437581	0.0437581	2.34017e-14	-2.68066	-3.79308	1	0.00754594	0.00016358	1	1
Rph3a	-3.68647e-17	-0.0436054	-0.167693	0.0396785	0.044267	0.044267	-9.29086e-16	-0.985054	-3.78822	1	0.324988	0.000166736	1	1
Arl4c	-5.10187e-16	-0.0654311	-0.167165	0.039567	0.0441427	0.0441427	-1.28943e-14	-1.48227	-3.78694	1	0.138785	0.000167581	1	1
Fth1	3.13353e-16	0.207418	0.162067	0.0383697	0.042807	0.042807	8.16666e-15	4.84543	3.78598	1	1.60364e-06	0.000168209	1	0.0467831
Sema3c	-4.5982e-16	-0.0891223	-0.166294	0.0394263	0.0439857	0.0439857	-1.16628e-14	-2.02617	-3.78063	1	0.0431817	0.000171782	1	1
Osbpl9	1.8329e-16	-0.117519	-0.165289	0.0392267	0.0437631	0.0437631	4.67257e-15	-2.68535	-3.7769	1	0.00744225	0.000174314	1	1
MIRc	-6.21314e-16	0.0942446	-0.168339	0.0399511	0.0445712	0.0445712	-1.55519e-14	2.11447	-3.77685	1	0.0348791	0.000174349	1	1
Cd200r2	1.46551e-16	-0.108821	-0.165531	0.039292	0.0438359	0.0438359	3.7298e-15	-2.48247	-3.77615	1	0.013315	0.000174831	1	1
Nfia	9.0239e-18	-0.0694128	0.168016	0.0399604	0.0445816	0.0445816	2.25821e-16	-1.55698	3.76873	1	0.119993	0.000179985	1	1
Lrp1	9.28531e-17	-0.0741042	-0.165972	0.0395253	0.0440962	0.0440962	2.34921e-15	-1.68051	-3.76386	1	0.0933686	0.000183444	1	1
Prpf4b	1.65669e-17	-0.216609	-0.160671	0.0382739	0.0427	0.0427	4.32852e-16	-5.0728	-3.76279	1	5.20687e-07	0.000184215	1	0.0152561
Gm26561	-5.64753e-17	0.0938497	-0.167545	0.0399555	0.0445761	0.0445761	-1.41345e-15	2.10538	-3.75862	1	0.0356657	0.000187243	1	1
Clu	-4.8606e-16	-0.16608	-0.162536	0.0388172	0.0433062	0.0433062	-1.25218e-14	-3.83501	-3.75319	1	0.000138588	0.000191255	1	1
Lrrc42	9.87863e-16	-0.0592496	0.167293	0.0399605	0.0445817	0.0445817	2.4721e-14	-1.32901	3.75251	1	0.18434	0.000191759	1	1
AI838599	2.07017e-16	-0.0492509	-0.166041	0.0396633	0.0442501	0.0442501	5.21937e-15	-1.11301	-3.75233	1	0.266141	0.000191897	1	1
B2_Rat4	-2.02582e-16	0.192614	0.161044	0.0385513	0.0430095	0.0430095	-5.25486e-15	4.4784	3.74437	1	8.97592e-06	0.00019794	1	0.259736
Lima1	1.41083e-16	-0.0991552	-0.164463	0.0393724	0.0439256	0.0439256	3.58329e-15	-2.25734	-3.74414	1	0.0243388	0.000198117	1	1
Mthfs	2.99249e-16	-0.011954	-0.166319	0.0398207	0.0444258	0.0444258	7.51491e-15	-0.269078	-3.74375	1	0.78796	0.000198418	1	1
Lekr1	9.04893e-16	-0.0448764	-0.165562	0.0396886	0.0442784	0.0442784	2.27998e-14	-1.01351	-3.73912	1	0.31122	0.000202022	1	1
Sh3gl1	4.45891e-16	-0.0442063	0.166446	0.039952	0.0445722	0.0445722	1.11607e-14	-0.991791	3.7343	1	0.321692	0.000205845	1	1
Phyhip	-4.77113e-16	0.180741	0.161106	0.0386802	0.0431533	0.0431533	-1.23348e-14	4.18834	3.73335	1	3.22393e-05	0.000206605	1	0.924237
Gm20625	-2.87255e-17	0.0916722	-0.1664	0.0399631	0.0445846	0.0445846	-7.188e-16	2.05614	-3.73224	1	0.0401932	0.000207495	1	1
Hmgb1-ps5	-3.97444e-16	-0.00812236	0.166021	0.0398848	0.0444973	0.0444973	-9.96481e-15	-0.182536	3.73103	1	0.855222	0.000208472	1	1
Pgr	-1.85298e-15	-0.051957	-0.16482	0.0396589	0.0442452	0.0442452	-4.67229e-14	-1.17429	-3.72516	1	0.240734	0.000213275	1	1
Nptx2	-2.11826e-17	0.57448	0.128595	0.0310005	0.0345855	0.0345855	-6.833e-16	16.6104	3.71817	1	2.08828e-51	0.000219126	1	6.24647e-47
L1-4A_Cpo	1.06912e-15	0.108242	-0.165688	0.0399486	0.0445684	0.0445684	2.67623e-14	2.42868	-3.71762	1	0.0154415	0.000219595	1	1
Nanos1	6.10426e-17	0.0262851	-0.16552	0.0399297	0.0445474	0.0445474	1.52875e-15	0.590048	-3.71559	1	0.555377	0.000221326	1	1
Asic4	-7.08144e-16	-0.0919779	-0.163414	0.0394314	0.0439914	0.0439914	-1.79589e-14	-2.09082	-3.71469	1	0.0369571	0.000222098	1	1
Lig1	6.30721e-16	-0.105107	-0.16304	0.0393416	0.0438912	0.0438912	1.60319e-14	-2.39472	-3.71463	1	0.0169333	0.000222148	1	1
Adra1b	-1.03818e-15	-0.0652178	-0.16394	0.0395941	0.0441729	0.0441729	-2.62205e-14	-1.47642	-3.71133	1	0.140346	0.000224999	1	1
Gm9218	5.12299e-17	0.0826917	-0.165506	0.0399728	0.0445955	0.0445955	1.28162e-15	1.85426	-3.71127	1	0.0641832	0.000225046	1	1
Zfp956	5.8332e-16	-0.138363	0.165112	0.0398893	0.0445023	0.0445023	1.46235e-14	-3.10912	3.71019	1	0.00196376	0.000225994	1	1
Fam171b	1.51413e-17	-0.118653	-0.162423	0.0392435	0.0437818	0.0437818	3.8583e-16	-2.71009	-3.70983	1	0.00691537	0.000226305	1	1
Ndst3	9.24648e-16	-0.0825367	-0.163452	0.0394934	0.0440606	0.0440606	2.34127e-14	-1.87325	-3.70972	1	0.0615104	0.0002264	1	1
Slc22a19	-6.82615e-17	-0.168446	-0.160575	0.0388129	0.0433014	0.0433014	-1.75873e-15	-3.89009	-3.70832	1	0.000111205	0.000227629	1	1
Synb	2.09739e-16	-0.0501251	0.16517	0.0399658	0.0445877	0.0445877	5.24796e-15	-1.12419	3.70438	1	0.261373	0.000231115	1	1
Gm26691	-2.21959e-16	-0.147351	-0.160894	0.0390126	0.0435242	0.0435242	-5.68943e-15	-3.38549	-3.69666	1	0.000756065	0.000238092	1	1
Gm28119	1.25981e-15	-0.126887	-0.161571	0.0391845	0.043716	0.043716	3.21507e-14	-2.90252	-3.69592	1	0.00383519	0.000238771	1	1
Cep89	-1.28907e-17	-0.0719136	0.164834	0.0399783	0.0446016	0.0446016	-3.22442e-16	-1.61236	3.6957	1	0.107401	0.000238979	1	1
Slc17a7	-1.31371e-16	0.15683	0.1603	0.0389296	0.0434316	0.0434316	-3.37459e-15	3.61096	3.69086	1	0.00033011	0.000243473	1	1
Ricksha_a	-1.15852e-15	0.104114	-0.164495	0.03996	0.0445811	0.0445811	-2.89919e-14	2.33537	-3.6898	1	0.0198467	0.000244463	1	1
Ttc26	1.66465e-16	-0.188467	0.163337	0.0397091	0.0443013	0.0443013	4.19212e-15	-4.25422	3.68695	1	2.42698e-05	0.000247157	1	0.697491
Reep6	-6.80464e-17	-0.09178	0.164418	0.0399731	0.0445958	0.0445958	-1.7023e-15	-2.05804	3.68686	1	0.0400097	0.000247242	1	1
Ptpn4	4.96768e-16	-0.0413679	-0.163208	0.0397231	0.0443169	0.0443169	1.25058e-14	-0.933458	-3.68274	1	0.350952	0.000251181	1	1
Pex26	1.02694e-15	0.00198703	-0.163705	0.0398832	0.0444954	0.0444954	2.57487e-14	0.0446569	-3.67915	1	0.964395	0.000254669	1	1
Ppp1r16b	-2.46879e-16	0.313788	0.151701	0.0369698	0.0412451	0.0412451	-6.67787e-15	7.60788	3.67803	1	1.05856e-13	0.00025576	1	3.15293e-09
Tmprss11b	6.93476e-17	-0.0990926	-0.161641	0.0393971	0.0439531	0.0439531	1.76022e-15	-2.25451	-3.67759	1	0.0245176	0.000256198	1	1
Gm29216	-2.44777e-16	0.0973819	-0.163989	0.0399702	0.0445926	0.0445926	-6.12399e-15	2.18382	-3.6775	1	0.0293553	0.000256282	1	1
Gm12120	4.3462e-16	-0.0631168	-0.162217	0.0396195	0.0442012	0.0442012	1.09698e-14	-1.42794	-3.66997	1	0.15382	0.000263784	1	1
Nmbr	-7.92039e-17	0.00447715	-0.16329	0.039893	0.0445064	0.0445064	-1.98541e-15	0.100596	-3.66891	1	0.919904	0.000264852	1	1
Nefl	4.46736e-16	0.191252	0.157984	0.0385981	0.0430618	0.0430618	1.1574e-14	4.44134	3.66878	1	1.06122e-05	0.000264992	1	0.30684
Insr	6.45488e-16	0.0535355	-0.163549	0.0399781	0.0446014	0.0446014	1.6146e-14	1.20031	-3.66691	1	0.230483	0.000266887	1	1
Ctnna2	1.43959e-16	-0.172786	-0.158674	0.0387876	0.0432732	0.0432732	3.71147e-15	-3.99291	-3.6668	1	7.3211e-05	0.000267003	1	1
Gm15478	-1.17799e-15	-0.0890329	0.163293	0.0399808	0.0446044	0.0446044	-2.94638e-14	-1.99606	3.66091	1	0.0463712	0.000273077	1	1
Spr-ps1	3.44196e-17	-0.165407	-0.158636	0.0388623	0.0433565	0.0433565	8.85681e-16	-3.81504	-3.65888	1	0.000150006	0.000275207	1	1
LTR64	2.0902e-15	0.0466591	-0.163083	0.0399746	0.0445974	0.0445974	5.22881e-14	1.04623	-3.65678	1	0.295869	0.000277417	1	1
Enho	6.55325e-16	-0.0506979	-0.161904	0.0396877	0.0442773	0.0442773	1.6512e-14	-1.14501	-3.65659	1	0.252654	0.00027762	1	1
Gpc6	3.99287e-16	-0.108546	-0.160464	0.0393385	0.0438878	0.0438878	1.015e-14	-2.47327	-3.65624	1	0.0136593	0.000277989	1	1
Chd2	2.01855e-16	-0.0593492	-0.161667	0.0396444	0.044229	0.044229	5.09164e-15	-1.34186	-3.65523	1	0.18014	0.000279062	1	1
Coq9	-1.14138e-15	-0.174881	0.162037	0.0397749	0.0443746	0.0443746	-2.8696e-14	-3.94102	3.65157	1	9.05109e-05	0.000282983	1	1
Gm26549	-1.31014e-16	-0.118602	-0.159918	0.0392662	0.0438071	0.0438071	-3.33655e-15	-2.70738	-3.6505	1	0.00697144	0.000284146	1	1
Gm23492	-5.60571e-16	0.00413006	-0.162486	0.0398973	0.0445112	0.0445112	-1.40503e-14	0.092787	-3.65044	1	0.926103	0.000284202	1	1
Birc5	-1.23938e-16	-0.0315294	-0.161982	0.0397759	0.0443758	0.0443758	-3.11591e-15	-0.71051	-3.65023	1	0.477659	0.000284435	1	1
E030042O20Rik	1.64008e-16	-0.116096	-0.159945	0.0392856	0.0438287	0.0438287	4.17475e-15	-2.64886	-3.64931	1	0.00828521	0.000285431	1	1
BC1_Dor	5.96786e-15	0.0561501	-0.162477	0.039986	0.0446102	0.0446102	1.49249e-13	1.25868	-3.64216	1	0.208625	0.000293311	1	1
Gm16041	-1.62723e-16	-0.0970116	-0.160108	0.0394246	0.0439839	0.0439839	-4.12744e-15	-2.20562	-3.64016	1	0.0277823	0.000295542	1	1
Gm13629	3.50639e-17	-0.135173	-0.158862	0.0391394	0.0436657	0.0436657	8.95871e-16	-3.09564	-3.63814	1	0.0020538	0.000297828	1	1
Atrn	2.07626e-16	-0.0793729	-0.160413	0.0395382	0.0441106	0.0441106	5.25127e-15	-1.79941	-3.63661	1	0.0724475	0.000299556	1	1
Dlgap1	-3.67247e-17	0.0609601	0.160792	0.0396424	0.0442269	0.0442269	-9.26399e-16	1.37835	3.63563	1	0.1686	0.00030068	1	1
Egfem1	-7.50508e-16	-0.0495425	-0.160901	0.039701	0.0442922	0.0442922	-1.8904e-14	-1.11854	-3.63271	1	0.263777	0.00030403	1	1
Plekhb2	4.41713e-17	-0.135459	-0.158574	0.0391396	0.0436658	0.0436658	1.12856e-15	-3.10218	-3.63154	1	0.00200963	0.00030538	1	1
Rassf2	-1.72649e-16	-0.0812192	-0.160149	0.0395288	0.0441001	0.0441001	-4.36769e-15	-1.8417	-3.6315	1	0.0660031	0.000305425	1	1
Tmem130	4.26157e-17	-0.240616	-0.154079	0.0380403	0.0424395	0.0424395	1.12028e-15	-5.66962	-3.63055	1	2.20848e-08	0.000306529	1	0.000651545
Gm22369	7.09276e-16	-0.100434	-0.159404	0.0394065	0.0439637	0.0439637	1.79989e-14	-2.28448	-3.6258	1	0.0226854	0.000312092	1	1
Tex9	-1.41313e-16	-0.126282	-0.15862	0.0392161	0.0437512	0.0437512	-3.60344e-15	-2.88637	-3.6255	1	0.00403485	0.000312455	1	1
Endod1	-6.34336e-17	-0.127004	-0.158584	0.0392105	0.0437449	0.0437449	-1.61777e-15	-2.90328	-3.6252	1	0.00382607	0.000312808	1	1
Slc25a53	-5.09702e-17	-0.0634047	-0.160259	0.0396332	0.0442165	0.0442165	-1.28605e-15	-1.43396	-3.62441	1	0.152095	0.000313744	1	1
Taf9	5.15254e-16	-0.0155638	0.161321	0.0399337	0.0445518	0.0445518	1.29027e-14	-0.349342	3.62096	1	0.726953	0.000317862	1	1
4930402H24Rik	1.45231e-16	-0.254396	-0.152907	0.0378665	0.0422455	0.0422455	3.83534e-15	-6.02184	-3.61949	1	2.97749e-09	0.000319636	1	8.81277e-05
Unc80	-4.11481e-18	-0.233421	-0.153907	0.0381364	0.0425466	0.0425466	-1.07897e-16	-5.48624	-3.61737	1	6.01983e-08	0.000322213	1	0.00177326
Limk2	2.58241e-17	-0.176382	0.16046	0.0397739	0.0443735	0.0443735	6.49272e-16	-3.97494	3.61611	1	7.88114e-05	0.000323745	1	1
Gm24715	6.87353e-16	-0.115742	-0.158496	0.039301	0.0438459	0.0438459	1.74894e-14	-2.63974	-3.61484	1	0.00850884	0.000325307	1	1
Dlgap2	9.79172e-17	0.194867	0.15549	0.0385835	0.0430455	0.0430455	2.5378e-15	4.527	3.61223	1	7.19346e-06	0.000328529	1	0.208467
Dennd2c	-7.40277e-17	0.0371062	0.160212	0.0397646	0.0443631	0.0443631	-1.86165e-15	0.83642	3.61139	1	0.403246	0.000329574	1	1
Pilra	1.90688e-15	-0.0176686	0.160724	0.0399422	0.0445612	0.0445612	4.77411e-14	-0.396501	3.6068	1	0.691874	0.000335327	1	1
Wdhd1	-4.46967e-17	0.0341429	0.160036	0.0397788	0.044379	0.044379	-1.12363e-15	0.769348	3.60611	1	0.441984	0.000336202	1	1
Ppp2r4	-1.91647e-16	-0.156238	-0.156681	0.0389698	0.0434765	0.0434765	-4.91782e-15	-3.59363	-3.60381	1	0.000352387	0.000339136	1	1
Gm7694	-1.09018e-16	-0.11317	0.160661	0.0399643	0.044586	0.044586	-2.72787e-15	-2.53824	3.6034	1	0.0113883	0.000339658	1	1
Aak1	3.38798e-19	-0.0899659	-0.158723	0.039484	0.0440501	0.0440501	8.58065e-18	-2.04235	-3.60323	1	0.0415451	0.000339873	1	1
Phf8	-3.89897e-17	-0.0935276	-0.158628	0.0394609	0.0440243	0.0440243	-9.88059e-16	-2.12445	-3.60319	1	0.0340332	0.000339933	1	1
Gm28874	-4.93592e-16	-0.165842	-0.156246	0.0388812	0.0433776	0.0433776	-1.26949e-14	-3.82322	-3.602	1	0.000145226	0.00034145	1	1
Araf	8.04081e-17	-0.119796	-0.157761	0.0392758	0.0438178	0.0438178	2.04727e-15	-2.73397	-3.60039	1	0.00643899	0.000343534	1	1
Ppp2r5a	-1.58043e-16	-0.132205	-0.157323	0.0391786	0.0437093	0.0437093	-4.03392e-15	-3.02465	-3.59929	1	0.00259374	0.000344952	1	1
Eps8	-1.64619e-16	-0.0120483	-0.159927	0.0398646	0.0444747	0.0444747	-4.12945e-15	-0.270902	-3.59592	1	0.786558	0.000349358	1	1
Gm17066	-3.63227e-16	-0.105489	0.160316	0.039978	0.0446012	0.0446012	-9.08567e-15	-2.36516	3.59444	1	0.0183339	0.000351316	1	1
Tyms	3.45245e-18	-0.102768	-0.157987	0.0394019	0.0439585	0.0439585	8.76214e-17	-2.33785	-3.59401	1	0.0197167	0.000351877	1	1
Lactb2	6.16248e-17	-0.0924839	-0.158255	0.039471	0.0440356	0.0440356	1.56127e-15	-2.10021	-3.59379	1	0.0361199	0.000352163	1	1
Clstn1	4.58074e-16	-0.29757	-0.149328	0.0372653	0.0415748	0.0415748	1.22922e-14	-7.15746	-3.59178	1	2.36562e-12	0.000354838	1	7.03747e-08
Myo5b	-5.94458e-16	0.0183648	0.15931	0.0398466	0.0444546	0.0444546	-1.49187e-14	0.413113	3.58365	1	0.679669	0.000365844	1	1
Pdgfb	-1.60563e-16	0.0371048	0.159008	0.0397733	0.0443728	0.0443728	-4.03695e-15	0.836205	3.58346	1	0.403367	0.000366104	1	1
Opa1	-4.33698e-17	-0.060951	-0.158447	0.0396605	0.044247	0.044247	-1.09353e-15	-1.37752	-3.58097	1	0.168857	0.000369539	1	1
Ddx26b	-5.54019e-16	-0.125334	-0.156542	0.0392422	0.0437804	0.0437804	-1.41179e-14	-2.8628	-3.57562	1	0.00434312	0.000377012	1	1
Lmbr1	2.90296e-17	-0.253834	-0.151034	0.0378956	0.042278	0.042278	7.6604e-16	-6.00393	-3.5724	1	3.3049e-09	0.000381588	1	9.78019e-05
Scrib	1.1749e-16	-0.042937	-0.158427	0.0397511	0.0443481	0.0443481	2.95564e-15	-0.968181	-3.57235	1	0.333337	0.000381659	1	1
RICKSHA	2.15967e-15	0.0907729	-0.159397	0.0399989	0.0446245	0.0446245	5.39931e-14	2.03415	-3.57195	1	0.0423679	0.000382229	1	1
SINEB2_MU	-3.02514e-17	0.0352702	0.158485	0.039785	0.0443859	0.0443859	-7.60371e-16	0.794626	3.5706	1	0.42714	0.000384157	1	1
Zmym3	-9.30203e-16	-0.256261	-0.150821	0.0378644	0.0422432	0.0422432	-2.45667e-14	-6.06632	-3.5703	1	2.29518e-09	0.00038459	1	6.79464e-05
App	-1.02115e-16	-0.154628	-0.155154	0.0389993	0.0435094	0.0435094	-2.61837e-15	-3.55389	-3.566	1	0.000408883	0.000390824	1	1
Ttc28	-8.64528e-17	-0.0262281	-0.158402	0.039823	0.0444283	0.0444283	-2.17093e-15	-0.590346	-3.56533	1	0.555177	0.000391806	1	1
Arxes1	-1.28117e-15	0.134397	0.155724	0.0391744	0.0437047	0.0437047	-3.27044e-14	3.07512	3.5631	1	0.00219813	0.000395082	1	1
Frem1	2.94848e-16	-0.0519706	-0.157796	0.0397121	0.0443046	0.0443046	7.42463e-15	-1.17303	-3.56162	1	0.241241	0.000397261	1	1
Syt1	-2.39871e-17	-0.08153	-0.157113	0.0395513	0.0441251	0.0441251	-6.06482e-16	-1.8477	-3.56063	1	0.0651289	0.000398737	1	1
Wrn	-3.54317e-16	-0.085875	-0.156946	0.0395251	0.044096	0.044096	-8.96434e-15	-1.94746	-3.55919	1	0.0519376	0.000400881	1	1
B1_Mus2	-1.26841e-16	-0.0230746	0.158637	0.0399661	0.044588	0.044588	-3.17372e-15	-0.517507	3.55784	1	0.60499	0.000402904	1	1
Bex1	-2.97182e-16	-0.0656817	-0.157254	0.0396437	0.0442283	0.0442283	-7.49631e-15	-1.48506	-3.5555	1	0.138043	0.000406432	1	1
Pdzrn4	2.56394e-16	-0.130607	-0.15552	0.039208	0.0437422	0.0437422	6.53932e-15	-2.98583	-3.55537	1	0.00294132	0.000406627	1	1
D130051D11Rik	3.71771e-17	-0.0965667	0.158622	0.0399971	0.0446225	0.0446225	9.29496e-16	-2.16408	3.55476	1	0.0308449	0.000407559	1	1
Cspg5	6.99229e-17	-0.0966213	-0.156374	0.0394584	0.0440216	0.0440216	1.77207e-15	-2.19486	-3.55222	1	0.0285489	0.000411439	1	1
Vps39	3.37631e-16	-0.188124	-0.153204	0.0386807	0.0431539	0.0431539	8.72868e-15	-4.35938	-3.55017	1	1.53034e-05	0.000414584	1	0.441428
Apc2	5.49386e-16	-0.13657	-0.154971	0.0391627	0.0436916	0.0436916	1.40283e-14	-3.12577	-3.54693	1	0.00185754	0.000419616	1	1
Vbp1	-2.80879e-18	-0.0925433	-0.156076	0.0394885	0.0440551	0.0440551	-7.11292e-17	-2.10063	-3.54275	1	0.036083	0.000426187	1	1
UCON86	-1.37511e-15	0.074274	-0.158123	0.0400136	0.0446409	0.0446409	-3.43662e-14	1.66381	-3.54211	1	0.0966632	0.000427197	1	1
Sorcs1	9.83223e-17	-0.0735468	-0.15645	0.0396049	0.044185	0.044185	2.48258e-15	-1.66452	-3.5408	1	0.096521	0.000429286	1	1
2810433D01Rik	4.79517e-17	-0.240553	-0.150404	0.0380819	0.0424859	0.0424859	1.25917e-15	-5.66196	-3.5401	1	2.30423e-08	0.000430397	1	0.000679747
Efcab12	-8.82637e-17	-0.067123	-0.156491	0.0396415	0.0442258	0.0442258	-2.22655e-15	-1.51773	-3.53846	1	0.129599	0.000433028	1	1
Rreb1	-8.03321e-16	0.122908	0.154803	0.039277	0.0438191	0.0438191	-2.04527e-14	2.80489	3.53276	1	0.00519354	0.000442269	1	1
Ppnr	-4.12215e-16	-0.146094	-0.154033	0.0390878	0.0436081	0.0436081	-1.05459e-14	-3.35016	-3.53221	1	0.000857409	0.00044317	1	1
Mas1	-4.04588e-16	0.0588085	0.156369	0.0396877	0.0442773	0.0442773	-1.01943e-14	1.32818	3.53157	1	0.184613	0.000444228	1	1
Ptprn2	7.05837e-16	-0.0947068	-0.155502	0.0394786	0.0440441	0.0440441	1.7879e-14	-2.15027	-3.5306	1	0.0319254	0.000445833	1	1
Kirrel3os	3.25336e-16	-0.053152	-0.156357	0.0397169	0.0443099	0.0443099	8.19137e-15	-1.19955	-3.52872	1	0.230779	0.000448942	1	1
Rnf182	-1.17217e-16	-0.106496	0.1574	0.0399898	0.0446144	0.0446144	-2.93116e-15	-2.38703	3.52801	1	0.0172882	0.000450129	1	1
Dync1h1	1.54858e-16	-0.126973	-0.154389	0.0392479	0.0437867	0.0437867	3.94564e-15	-2.8998	-3.52593	1	0.00386818	0.000453603	1	1
Gm24105	-7.75302e-16	0.0770365	-0.157362	0.0400168	0.0446445	0.0446445	-1.93744e-14	1.72556	-3.52479	1	0.0849331	0.000455527	1	1
Elfn1	2.579e-16	-0.158715	-0.153229	0.0389789	0.0434865	0.0434865	6.6164e-15	-3.64975	-3.52359	1	0.000284952	0.000457553	1	1
Hpgd	1.18168e-16	-0.123779	0.157044	0.0399591	0.0445802	0.0445802	2.95722e-15	-2.77654	3.52273	1	0.00566251	0.000458996	1	1
L1-1B_Cpo	9.57497e-16	0.0938053	-0.157067	0.0400073	0.0446339	0.0446339	2.39331e-14	2.10166	-3.519	1	0.0359919	0.000465382	1	1
Ahi1	4.19647e-16	-0.286081	-0.146984	0.0374732	0.0418068	0.0418068	1.11986e-14	-6.84294	-3.5158	1	1.88993e-11	0.000470913	1	5.61688e-07
Ctxn1	3.10416e-16	0.0163648	0.156225	0.0398746	0.0444859	0.0444859	7.78481e-15	0.367866	3.5118	1	0.713101	0.000477915	1	1
CAVID1B	-2.23493e-15	0.00850503	-0.156488	0.0399473	0.044567	0.044567	-5.59469e-14	0.190837	-3.5113	1	0.848717	0.000478797	1	1
Gm14049	-4.86669e-16	-0.128477	0.15648	0.0399505	0.0445706	0.0445706	-1.21818e-14	-2.88254	3.51084	1	0.00408345	0.000479594	1	1
Gm13055	-3.67688e-16	-0.0520946	-0.155507	0.0397284	0.0443228	0.0443228	-9.25503e-15	-1.17535	-3.50851	1	0.240314	0.000483744	1	1
Astn1	-3.39751e-16	-0.199438	-0.15084	0.0385796	0.0430411	0.0430411	-8.80649e-15	-4.63366	-3.50455	1	4.39373e-06	0.000490842	1	0.127585
Abcc9	-1.49584e-16	-0.17474	-0.151786	0.038835	0.043326	0.043326	-3.85177e-15	-4.03315	-3.50335	1	6.20042e-05	0.000493024	1	1
Vezt	1.90382e-17	-0.136901	-0.152864	0.0391787	0.0437095	0.0437095	4.85933e-16	-3.13206	-3.49728	1	0.00181883	0.000504141	1	1
Chrna4	-9.28296e-16	-0.0979008	-0.153925	0.0394697	0.0440342	0.0440342	-2.35192e-14	-2.22329	-3.49559	1	0.0265612	0.000507282	1	1
Tnfrsf10b	-3.47454e-16	-0.0879148	-0.15398	0.0395358	0.0441078	0.0441078	-8.78835e-15	-1.99318	-3.49099	1	0.0466861	0.000515934	1	1
Myl12a	8.78989e-17	0.0430364	-0.155786	0.0400124	0.0446396	0.0446396	2.19679e-15	0.964086	-3.48986	1	0.335384	0.000518067	1	1
Ctsh	-1.05607e-16	-0.0914669	-0.15377	0.0395143	0.0440839	0.0440839	-2.67262e-15	-2.07484	-3.48813	1	0.0384196	0.000521368	1	1
Ctsd	1.89977e-16	-0.122977	-0.152843	0.0392934	0.0438374	0.0438374	4.83484e-15	-2.80531	-3.4866	1	0.00518684	0.000524303	1	1
Sbf2	1.78168e-16	-0.128792	-0.15266	0.0392482	0.043787	0.043787	4.53953e-15	-2.94134	-3.48643	1	0.00339175	0.000524625	1	1
Ptprd	1.02592e-16	-0.273154	-0.146508	0.0376725	0.0420291	0.0420291	2.72326e-15	-6.49917	-3.48587	1	1.67777e-10	0.000525698	1	4.98063e-06
Pik3r5	5.39826e-16	-0.0598725	-0.154127	0.0396988	0.0442898	0.0442898	1.3598e-14	-1.35184	-3.47997	1	0.176928	0.000537186	1	1
Ppan	4.15083e-16	0.248796	0.147523	0.0380038	0.0423987	0.0423987	1.09221e-14	5.868	3.47942	1	7.23389e-09	0.000538273	1	0.000213805
Jph4	1.50194e-16	-0.104582	-0.152976	0.0394307	0.0439907	0.0439907	3.80906e-15	-2.37736	-3.47747	1	0.017744	0.000542122	1	1
Ablim1	-3.15435e-16	-0.252468	-0.147216	0.0379573	0.0423469	0.0423469	-8.31026e-15	-5.96191	-3.47643	1	4.2172e-09	0.000544193	1	0.000124719
Lztr1	3.11086e-16	-0.184627	0.154129	0.0397564	0.044354	0.044354	7.82479e-15	-4.16258	3.47498	1	3.5989e-05	0.000547074	1	1
Gm11834	8.68122e-17	0.105017	-0.155064	0.0400025	0.0446286	0.0446286	2.17017e-15	2.35313	-3.47455	1	0.0189323	0.00054793	1	1
L1_Mur2_orf2	4.37384e-16	0.0641491	-0.155046	0.0400294	0.0446586	0.0446586	1.09266e-14	1.43643	-3.4718	1	0.151391	0.000553468	1	1
Gm12942	5.27577e-16	-0.143919	-0.151499	0.0391301	0.0436552	0.0436552	1.34826e-14	-3.29672	-3.47036	1	0.0010349	0.000556395	1	1
Tmeff1	-2.1804e-16	-0.0731667	-0.153348	0.0396311	0.0442142	0.0442142	-5.50175e-15	-1.65482	-3.46831	1	0.0984738	0.000560577	1	1
Tulp4	1.19422e-16	0.0351795	-0.154725	0.040009	0.0446358	0.0446358	2.98487e-15	0.788146	-3.46639	1	0.430917	0.000564517	1	1
Tac2	8.22107e-17	-0.0893584	-0.152873	0.0395352	0.0441073	0.0441073	2.07943e-15	-2.02594	-3.46594	1	0.0432055	0.000565428	1	1
Siglec1	-5.34019e-17	0.0178689	0.154175	0.039883	0.0444953	0.0444953	-1.33896e-15	0.401592	3.46497	1	0.688125	0.000567437	1	1
Cers4	-8.51305e-17	-0.211116	-0.148647	0.0384675	0.042916	0.042916	-2.21305e-15	-4.91927	-3.46367	1	1.11827e-06	0.000570136	1	0.0326702
Gm24303	-1.05265e-16	-0.0870534	0.154634	0.0400247	0.0446534	0.0446534	-2.63001e-15	-1.94954	3.46298	1	0.0516885	0.000571567	1	1
Mgarp	-1.62143e-16	-0.0483885	-0.153592	0.0397604	0.0443585	0.0443585	-4.07801e-15	-1.09085	-3.46252	1	0.275768	0.000572535	1	1
Cxxc4	-2.51903e-16	-0.191743	-0.149404	0.0386792	0.0431522	0.0431522	-6.51262e-15	-4.44342	-3.46227	1	1.05133e-05	0.000573056	1	0.304013
Trpm2	1.28905e-16	-0.112077	0.154407	0.0399938	0.0446188	0.0446188	3.22313e-15	-2.51188	3.46058	1	0.0122655	0.000576599	1	1
L1MCA_5	-8.91471e-16	0.0619272	-0.154517	0.0400317	0.0446611	0.0446611	-2.22691e-14	1.3866	-3.45977	1	0.166068	0.000578302	1	1
Gipr	1.39653e-15	0.148401	0.150805	0.0390964	0.0436177	0.0436177	3.572e-14	3.40231	3.45743	1	0.000711839	0.000583242	1	1
GSAT_MM	-1.71039e-16	0.0164201	-0.154198	0.0399795	0.0446029	0.0446029	-4.27817e-15	0.368139	-3.45712	1	0.712897	0.000583894	1	1
Abhd6	-1.72849e-17	-0.0978038	0.154267	0.0400158	0.0446434	0.0446434	-4.3195e-16	-2.19078	3.45554	1	0.0288449	0.000587259	1	1
Rabgap1l	2.87794e-19	-0.259031	-0.145975	0.0378806	0.0422612	0.0422612	7.5974e-18	-6.12929	-3.45412	1	1.58342e-09	0.000590313	1	4.6901e-05
Atf7ip	1.38975e-16	-0.242549	-0.14675	0.0380956	0.0425012	0.0425012	3.64805e-15	-5.70688	-3.45284	1	1.79521e-08	0.000593061	1	0.000529983
Mir5136	-2.49335e-15	-0.120555	0.153893	0.0399793	0.0446026	0.0446026	-6.23661e-14	-2.70287	3.45032	1	0.0070655	0.000598516	1	1
Rgs10	2.05385e-16	-0.0158443	-0.153335	0.0398956	0.0445093	0.0445093	5.14805e-15	-0.355976	-3.44501	1	0.721981	0.000610158	1	1
Gm25395	-1.15389e-16	0.0059762	-0.153568	0.0399591	0.0445801	0.0445801	-2.88768e-15	0.134055	-3.44476	1	0.893403	0.000610726	1	1
CAVID2A	-1.67067e-16	0.0188053	-0.153594	0.039988	0.0446124	0.0446124	-4.17793e-15	0.421525	-3.44286	1	0.67352	0.000614935	1	1
Trim52	3.58777e-16	-0.0356532	-0.152822	0.0398232	0.0444285	0.0444285	9.00924e-15	-0.802483	-3.43973	1	0.422585	0.000621962	1	1
Pik3r1	1.08585e-15	-0.104324	-0.151195	0.0394472	0.044009	0.044009	2.75267e-14	-2.37052	-3.43554	1	0.0180726	0.000631472	1	1
Impad1	-8.17864e-16	-0.0900378	-0.151528	0.0395415	0.0441142	0.0441142	-2.06837e-14	-2.04101	-3.4349	1	0.0416786	0.000632929	1	1
Gabra4	7.25861e-17	0.23833	0.146012	0.0381588	0.0425717	0.0425717	1.90221e-15	5.59833	3.42979	1	3.27206e-08	0.000644752	1	0.000964733
RMER1B	-7.24142e-16	0.08611	-0.153173	0.0400324	0.0446619	0.0446619	-1.80889e-14	1.92804	-3.42962	1	0.0543129	0.000645145	1	1
Prrg1	2.55834e-16	-0.116065	-0.150577	0.0393662	0.0439187	0.0439187	6.49881e-15	-2.64273	-3.42854	1	0.00843479	0.000647656	1	1
Gm15723	2.4587e-16	-0.110934	0.152995	0.0400019	0.0446278	0.0446278	6.14647e-15	-2.48575	3.42824	1	0.0131941	0.000648363	1	1
Gm2974	-3.07119e-16	-0.112288	0.152918	0.0399997	0.0446255	0.0446255	-7.67803e-15	-2.51622	3.42669	1	0.0121171	0.000651997	1	1
Tcof1	-6.53337e-17	-0.0486862	-0.151918	0.039771	0.0443703	0.0443703	-1.64275e-15	-1.09727	-3.42387	1	0.272955	0.000658674	1	1
Gm10308	-9.51709e-16	-0.187364	-0.14794	0.0387407	0.0432209	0.0432209	-2.45661e-14	-4.33502	-3.42289	1	1.70429e-05	0.00066102	1	0.491243
Skint4	1.16816e-16	-0.171149	-0.148453	0.0389029	0.0434017	0.0434017	3.00276e-15	-3.94337	-3.42044	1	8.96487e-05	0.00066688	1	1
Mdga2	5.00804e-17	-0.117018	-0.150201	0.0393621	0.0439141	0.0439141	1.2723e-15	-2.66469	-3.42033	1	0.00790944	0.000667141	1	1
Gm24447	-1.4524e-15	-0.0472774	-0.151776	0.0397786	0.0443788	0.0443788	-3.6512e-14	-1.06531	-3.42	1	0.287154	0.00066794	1	1
Ntrk2	-4.0452e-17	0.348606	-0.146481	0.038394	0.0428341	0.0428341	-1.0536e-15	8.13852	-3.41973	1	2.24827e-15	0.000668603	1	6.70344e-11
Kcna1	-6.84543e-16	0.300378	0.142268	0.0373066	0.0416209	0.0416209	-1.83491e-14	7.21699	3.41819	1	1.58283e-12	0.000672323	1	4.7097e-08
Gm27224	-7.07961e-16	-0.193527	-0.147445	0.0386791	0.0431521	0.0431521	-1.83035e-14	-4.48477	-3.41686	1	8.72041e-06	0.000675537	1	0.252465
Gm7258	-6.6081e-16	0.109072	-0.152503	0.0400072	0.0446338	0.0446338	-1.65173e-14	2.4437	-3.41675	1	0.0148192	0.000675811	1	1
Gm17167	-3.09831e-16	-0.238645	-0.14544	0.0381609	0.042574	0.042574	-8.11907e-15	-5.60543	-3.41618	1	3.14707e-08	0.000677209	1	0.000928007
Csmd3	-1.22681e-16	-0.219082	-0.146133	0.0383985	0.042839	0.042839	-3.19493e-15	-5.11407	-3.4112	1	4.22532e-07	0.000689452	1	0.0123874
Gm19744	-1.23015e-15	-0.0242892	-0.151683	0.0398763	0.0444877	0.0444877	-3.08493e-14	-0.545976	-3.40954	1	0.585282	0.000693578	1	1
Gm5316	-1.65709e-16	-0.205521	-0.146629	0.0385529	0.0430114	0.0430114	-4.29823e-15	-4.77829	-3.40909	1	2.21659e-06	0.000694724	1	0.0645604
Noa1	4.38205e-16	-0.193447	0.15099	0.0397212	0.0443148	0.0443148	1.1032e-14	-4.36529	3.40721	1	1.49077e-05	0.000699414	1	0.430072
Sfrp2	-1.86837e-17	-0.0506386	-0.151112	0.0397674	0.0443662	0.0443662	-4.69825e-16	-1.14138	-3.40602	1	0.25416	0.000702411	1	1
Sox2	7.92166e-17	-0.0440876	-0.151114	0.0397981	0.0444005	0.0444005	1.99046e-15	-0.992954	-3.40343	1	0.321125	0.000708993	1	1
Trhde	4.60442e-16	-0.0775202	0.151643	0.0400447	0.0446756	0.0446756	1.14982e-14	-1.73518	3.39432	1	0.0832132	0.000732543	1	1
Lgmn	-1.93987e-16	-0.172284	-0.14727	0.0389027	0.0434015	0.0434015	-4.98648e-15	-3.96953	-3.39319	1	8.05752e-05	0.000735505	1	1
G2e3	6.91402e-17	-0.0557796	-0.1504	0.0397472	0.0443437	0.0443437	1.7395e-15	-1.25789	-3.39168	1	0.208911	0.000739504	1	1
Dnah7b	-1.17716e-16	-0.200318	-0.146083	0.0386174	0.0430832	0.0430832	-3.04827e-15	-4.64957	-3.39072	1	4.07869e-06	0.000742062	1	0.118482
Gm15298	-2.07676e-16	-0.171262	-0.147133	0.0389141	0.0434143	0.0434143	-5.33678e-15	-3.94482	-3.38905	1	8.91233e-05	0.000746502	1	1
Trpc3	1.76301e-16	0.00240765	-0.15103	0.0399655	0.0445873	0.0445873	4.41133e-15	0.0539987	-3.3873	1	0.956954	0.000751192	1	1
Ptp4a2	4.30964e-16	0.225224	0.144818	0.0383372	0.0427707	0.0427707	1.12414e-14	5.26584	3.38593	1	1.93578e-07	0.000754888	1	0.00568828
Cyb5r4	-8.97701e-18	-0.152776	-0.147602	0.0390857	0.0436058	0.0436058	-2.29675e-16	-3.50357	-3.38491	1	0.000492626	0.00075763	1	1
Fbxl5	-6.87678e-17	-0.0910765	-0.149131	0.0395536	0.0441278	0.0441278	-1.7386e-15	-2.06393	-3.37952	1	0.0394463	0.000772371	1	1
Rora	-2.44337e-16	-0.0316371	-0.150252	0.0398573	0.0444666	0.0444666	-6.13029e-15	-0.71148	-3.37897	1	0.477058	0.000773878	1	1
Rab7	4.31842e-17	-0.0269354	0.150853	0.0400187	0.0446466	0.0446466	1.0791e-15	-0.603302	3.37883	1	0.546532	0.000774284	1	1
Pycr2	2.45828e-16	-0.131342	0.150554	0.0399666	0.0445885	0.0445885	6.15084e-15	-2.94565	3.37653	1	0.00334548	0.000780651	1	1
Jph3	-2.5215e-17	-0.0064599	0.150532	0.0399788	0.0446021	0.0446021	-6.3071e-16	-0.144834	3.375	1	0.88489	0.000784924	1	1
Mns1	1.72425e-16	-0.0478929	-0.149775	0.0397899	0.0443913	0.0443913	4.33338e-15	-1.07888	-3.37398	1	0.281068	0.000787793	1	1
Tanc1	-4.86446e-17	0.362219	0.136574	0.0363001	0.040498	0.040498	-1.34007e-15	8.94413	3.37236	1	4.43827e-18	0.000792357	1	1.32469e-13
Il11	-1.66982e-16	0.0362433	0.149855	0.0398411	0.0444485	0.0444485	-4.19119e-15	0.8154	3.37142	1	0.415161	0.000795001	1	1
Hdac5	2.40855e-16	-0.0762639	-0.148978	0.0396462	0.044231	0.044231	6.07511e-15	-1.72422	-3.36817	1	0.0851743	0.000804265	1	1
Gm15881	-2.49405e-16	-0.0690762	-0.148647	0.0396896	0.0442795	0.0442795	-6.28388e-15	-1.56	-3.35701	1	0.119277	0.000836835	1	1
1700029F12Rik	-3.18858e-17	0.346347	0.136992	0.0365897	0.0408211	0.0408211	-8.71442e-16	8.48451	3.35592	1	1.6372e-16	0.000840069	1	4.88345e-12
Gm27699	4.80167e-16	-0.0542466	-0.148882	0.0397656	0.0443643	0.0443643	1.20749e-14	-1.22275	-3.35589	1	0.221894	0.00084016	1	1
Kcnt1	-1.28233e-16	-0.0616749	-0.148726	0.039729	0.0443234	0.0443234	-3.2277e-15	-1.39148	-3.35546	1	0.164588	0.000841434	1	1
Rnf128	9.71038e-16	0.148144	0.146461	0.0391376	0.0436636	0.0436636	2.48109e-14	3.39284	3.3543	1	0.000736449	0.000844912	1	1
4732490B19Rik	-2.19178e-16	-0.0325582	-0.149137	0.0398611	0.0444708	0.0444708	-5.49854e-15	-0.732125	-3.3536	1	0.464373	0.00084702	1	1
Hdac1	-5.35883e-16	-0.138933	0.149462	0.0399492	0.0445691	0.0445691	-1.34141e-14	-3.11725	3.35348	1	0.00191121	0.000847376	1	1
Rttn	-2.78064e-16	0.00223606	-0.149519	0.0399743	0.044597	0.044597	-6.95607e-15	0.0501392	-3.35266	1	0.960028	0.000849828	1	1
Wdr31	1.55121e-16	-0.272196	-0.141181	0.0377474	0.0421127	0.0421127	4.10944e-15	-6.46351	-3.35246	1	2.09311e-10	0.000850448	1	6.21235e-06
Sfxn5	-5.59944e-16	-0.283262	0.146176	0.0390867	0.0436068	0.0436068	-1.43257e-14	-6.49581	3.35214	1	1.71315e-10	0.000851402	1	5.08533e-06
Sh3bgrl2	3.25221e-17	-0.0917878	-0.147933	0.0395583	0.044133	0.044133	8.2213e-16	-2.0798	-3.35198	1	0.0379605	0.00085188	1	1
Slc25a33	-1.0383e-17	-0.0288099	0.149533	0.040029	0.0446582	0.0446582	-2.59386e-16	-0.64512	3.34838	1	0.519091	0.000862834	1	1
Cacna1e	-1.61509e-16	0.207852	0.143995	0.0385526	0.043011	0.043011	-4.18933e-15	4.83253	3.34788	1	1.707e-06	0.000864373	1	0.0497796
Gm28010	2.10799e-16	-0.0839692	0.149546	0.0400508	0.0446824	0.0446824	5.26328e-15	-1.87925	3.34687	1	0.0606867	0.000867465	1	1
Timp2	3.90308e-16	-0.161228	-0.145701	0.0390245	0.0435374	0.0435374	1.00016e-14	-3.70321	-3.34657	1	0.000232164	0.000868399	1	1
Il5	-2.01395e-16	0.0251638	-0.149324	0.0400244	0.044653	0.044653	-5.0318e-15	0.563541	-3.34411	1	0.573273	0.000875995	1	1
Cnot6l	-2.30151e-16	0.0402623	-0.149271	0.0400452	0.0446762	0.0446762	-5.74729e-15	0.901202	-3.34117	1	0.367836	0.000885132	1	1
Ccdc50	-1.31546e-17	-0.182049	-0.14464	0.0388283	0.0433185	0.0433185	-3.38789e-16	-4.20256	-3.33899	1	3.03328e-05	0.000891974	1	0.870066
Gm2245	-1.68866e-16	-0.0357088	-0.148441	0.0398529	0.0444616	0.0444616	-4.23724e-15	-0.803138	-3.33864	1	0.422207	0.000893097	1	1
Trpc4ap	1.887e-16	-0.0566989	-0.147978	0.0397599	0.0443579	0.0443579	4.74598e-15	-1.27822	-3.33601	1	0.201659	0.000901433	1	1
HAL1-2A_Cpo	3.05673e-16	0.022733	-0.148871	0.0400228	0.0446512	0.0446512	7.63748e-15	0.509123	-3.3341	1	0.61085	0.000907545	1	1
Gm29013	-3.86379e-16	0.0221743	-0.14874	0.0400226	0.0446509	0.0446509	-9.65404e-15	0.496615	-3.33116	1	0.619639	0.000916987	1	1
Padi2	1.61833e-16	0.0607753	0.147673	0.0397413	0.0443371	0.0443371	4.07216e-15	1.37076	3.33068	1	0.170954	0.000918562	1	1
A330102I10Rik	-6.38283e-16	-0.214802	-0.142663	0.038485	0.0429356	0.0429356	-1.65853e-14	-5.00289	-3.32272	1	7.39298e-07	0.000944689	1	0.021637
Rgs12	8.08564e-16	-0.189791	-0.143662	0.0387562	0.0432381	0.0432381	2.08628e-14	-4.38943	-3.32257	1	1.33905e-05	0.000945185	1	0.386623
Gm15758	2.34713e-16	-0.116748	-0.145967	0.0393992	0.0439555	0.0439555	5.95729e-15	-2.65606	-3.32078	1	0.00811241	0.00095114	1	1
Fam198a	1.47784e-16	0.0190697	-0.148169	0.0400201	0.0446482	0.0446482	3.69274e-15	0.427111	-3.31858	1	0.669449	0.000958543	1	1
Sclt1	-2.37479e-17	-0.193352	-0.143298	0.0387214	0.0431993	0.0431993	-6.13303e-16	-4.47582	-3.31713	1	9.08157e-06	0.000963434	1	0.262775
Gm28893	1.13032e-15	-0.0343086	-0.147512	0.0398649	0.044475	0.044475	2.83537e-14	-0.771414	-3.31673	1	0.44076	0.000964783	1	1
Fmr1	4.91989e-16	0.104053	-0.148036	0.0400342	0.044664	0.044664	1.22892e-14	2.32969	-3.31445	1	0.0201472	0.000972561	1	1
Gm10720	4.8997e-16	-0.0192816	-0.147547	0.0399213	0.0445379	0.0445379	1.22734e-14	-0.432924	-3.31285	1	0.665222	0.000978047	1	1
B1_Mm	2.35709e-16	-0.0291422	0.147737	0.0400395	0.0446698	0.0446698	5.8869e-15	-0.652392	3.30731	1	0.514394	0.000997254	1	1
Kcnq3	-1.14648e-16	-0.132663	-0.144919	0.0392831	0.0438259	0.0438259	-2.91851e-15	-3.02705	-3.3067	1	0.00257353	0.000999383	1	1
Cml2	-5.87136e-17	0.0128946	-0.147503	0.0400115	0.0446386	0.0446386	-1.46742e-15	0.288866	-3.30439	1	0.772782	0.00100748	1	1
Gm16149	-5.22148e-16	0.0733311	-0.147449	0.0400662	0.0446996	0.0446996	-1.30321e-14	1.64053	-3.29866	1	0.101409	0.0010279	1	1
n-R5s193	-6.77276e-16	-0.0184656	-0.146932	0.039928	0.0445454	0.0445454	-1.69624e-14	-0.414534	-3.29848	1	0.678629	0.00102857	1	1
9530056K15Rik	-3.82513e-16	-0.065533	-0.14614	0.0397272	0.0443214	0.0443214	-9.62849e-15	-1.47858	-3.29728	1	0.139767	0.00103287	1	1
Plekha2	-6.84237e-16	0.35762	0.133968	0.0364213	0.0406332	0.0406332	-1.87867e-14	8.80117	3.29701	1	1.38434e-17	0.00103387	1	4.13074e-13
Tnfrsf22	-2.11978e-16	-0.0564315	-0.146293	0.0397731	0.0443726	0.0443726	-5.32968e-15	-1.27176	-3.29693	1	0.203941	0.00103416	1	1
Grk4	3.29328e-16	-0.209234	-0.141709	0.0385595	0.0430186	0.0430186	8.54079e-15	-4.86379	-3.29414	1	1.46678e-06	0.0010443	1	0.042802
Eif4g1	-3.13393e-16	-0.0369924	0.147122	0.0400531	0.044685	0.044685	-7.82443e-15	-0.827849	3.29242	1	0.408079	0.00105058	1	1
Zfp84	4.57904e-17	-0.00714699	0.146867	0.0400023	0.0446283	0.0446283	1.14469e-15	-0.160145	3.2909	1	0.87282	0.00105619	1	1
Slc25a12	-1.96217e-16	-0.0967193	-0.145159	0.0395475	0.044121	0.044121	-4.96155e-15	-2.19214	-3.29003	1	0.0287459	0.0010594	1	1
Dcaf17	8.20991e-17	-0.218117	-0.141159	0.0384609	0.0429086	0.0429086	2.13461e-15	-5.08328	-3.28977	1	4.93856e-07	0.00106037	1	0.0144724
Rnpc3	-5.04926e-17	-0.248205	-0.13981	0.0380957	0.0425012	0.0425012	-1.32542e-15	-5.83996	-3.28956	1	8.48681e-09	0.00106113	1	0.000250794
Gm23617	-2.54985e-16	-0.136339	0.146668	0.0399668	0.0445888	0.0445888	-6.3799e-15	-3.0577	3.28935	1	0.00232791	0.00106193	1	1
Gm27247	-5.14626e-16	0.0503759	-0.14691	0.0400658	0.0446992	0.0446992	-1.28445e-14	1.127	-3.28664	1	0.260186	0.00107201	1	1
B2_Mm2	1.45448e-16	0.197541	0.141746	0.0386907	0.043165	0.043165	3.75926e-15	4.57641	3.28383	1	5.73169e-06	0.00108257	1	0.166265
Smc5	-4.34545e-17	-0.0495369	-0.145667	0.0398107	0.0444146	0.0444146	-1.09153e-15	-1.11533	-3.27971	1	0.265148	0.00109822	1	1
Ntng2	-2.90466e-16	-0.0312332	-0.145927	0.0398876	0.0445004	0.0445004	-7.2821e-15	-0.701864	-3.27923	1	0.483031	0.00110004	1	1
Gm6297	8.10346e-17	-0.0459812	-0.145637	0.0398273	0.0444331	0.0444331	2.03465e-15	-1.03484	-3.27768	1	0.301152	0.00110601	1	1
L1MdV_II	6.8445e-16	0.0324306	-0.14641	0.0400513	0.044683	0.044683	1.70893e-14	0.725792	-3.27663	1	0.468244	0.00111006	1	1
Chrne	-4.5922e-16	-0.108658	0.146295	0.0400336	0.0446632	0.0446632	-1.14709e-14	-2.43283	3.27552	1	0.0152673	0.00111435	1	1
Erbb2ip	-3.01327e-16	-0.0402912	-0.145488	0.0398534	0.0444622	0.0444622	-7.56089e-15	-0.90619	-3.27216	1	0.365193	0.00112743	1	1
Parvb	-5.49008e-17	0.0706244	0.144902	0.0397084	0.0443005	0.0443005	-1.3826e-15	1.59421	3.27089	1	0.111406	0.00113243	1	1
Dnajc1	1.54079e-16	0.292812	0.136801	0.0374897	0.0418251	0.0418251	4.10992e-15	7.00087	3.27079	1	6.72049e-12	0.00113281	1	1.99847e-07
Cd46	-6.44114e-16	-0.128593	-0.143468	0.0393281	0.0438762	0.0438762	-1.6378e-14	-2.93082	-3.26983	1	0.00350705	0.0011366	1	1
Gm17131	4.50843e-17	-0.157654	-0.142539	0.0390862	0.0436063	0.0436063	1.15346e-15	-3.6154	-3.26876	1	0.000324627	0.00114082	1	1
Gm13563	6.98377e-17	-0.0939414	0.14588	0.0400574	0.0446898	0.0446898	1.74344e-15	-2.10208	3.26427	1	0.0359551	0.00115874	1	1
Gm25000	4.79364e-16	-0.076146	-0.144449	0.0396805	0.0442693	0.0442693	1.20806e-14	-1.72006	-3.26296	1	0.0859274	0.00116405	1	1
Psmc6	1.07394e-16	0.0622846	-0.145877	0.040075	0.0447094	0.0447094	2.67982e-15	1.3931	-3.26278	1	0.164097	0.00116476	1	1
UCON54	1.73526e-15	0.0898722	-0.145761	0.0400624	0.0446954	0.0446954	4.33139e-14	2.01077	-3.26121	1	0.0447886	0.00117111	1	1
Cdc123	1.21434e-16	-0.113821	-0.143212	0.0394433	0.0440047	0.0440047	3.0787e-15	-2.58657	-3.25447	1	0.00992375	0.00119878	1	1
Slc35f4	-4.07992e-16	-0.131238	-0.142737	0.039313	0.0438593	0.0438593	-1.0378e-14	-2.99226	-3.25442	1	0.00288093	0.00119898	1	1
Eci2	3.73638e-17	-0.143885	0.145042	0.0399491	0.044569	0.044569	9.35287e-16	-3.22837	3.25433	1	0.00131166	0.00119935	1	1
Ubb	2.46202e-16	-0.0204686	0.145306	0.0400388	0.0446691	0.0446691	6.14909e-15	-0.458227	3.25294	1	0.646952	0.00120514	1	1
Sepw1	1.52759e-16	0.154585	0.141961	0.0391194	0.0436434	0.0436434	3.90494e-15	3.54199	3.25275	1	0.00042738	0.00120594	1	1
Cnppd1	-2.30708e-16	0.0192111	0.144911	0.0399382	0.0445568	0.0445568	-5.77662e-15	0.431159	3.25227	1	0.666505	0.00120793	1	1
Surf6	-1.46706e-16	-0.0709218	-0.143999	0.0397133	0.0443059	0.0443059	-3.69412e-15	-1.60073	-3.25011	1	0.109954	0.00121698	1	1
Cd200	-2.40141e-16	-0.241681	-0.138482	0.0381954	0.0426125	0.0426125	-6.28718e-15	-5.67159	-3.24981	1	2.18445e-08	0.00121824	1	0.0006445
Gm21092	6.55298e-18	-0.179229	-0.140951	0.0388917	0.0433893	0.0433893	1.68493e-16	-4.13071	-3.24852	1	4.12027e-05	0.00122369	1	1
Gm15602	-1.86079e-16	-0.127715	0.144877	0.0399971	0.0446225	0.0446225	-4.65232e-15	-2.86212	3.24672	1	0.00435226	0.00123133	1	1
AU015336	1.16468e-16	-0.0109219	-0.144751	0.039966	0.0445878	0.0445878	2.91418e-15	-0.244952	-3.24642	1	0.806576	0.00123261	1	1
Sap30	2.16474e-17	-0.113163	0.144878	0.0400306	0.0446599	0.0446599	5.40772e-16	-2.53389	3.24402	1	0.0115292	0.00124283	1	1
A430033K04Rik	1.32577e-16	-0.048805	-0.144102	0.0398248	0.0444303	0.0444303	3.32899e-15	-1.09846	-3.24332	1	0.272436	0.00124586	1	1
Stag2	1.78319e-16	-0.104495	-0.142931	0.0395121	0.0440814	0.0440814	4.51302e-15	-2.3705	-3.24243	1	0.0180734	0.0012497	1	1
MUSID5	-1.10891e-15	-0.261907	0.142026	0.0392768	0.0438189	0.0438189	-2.82331e-14	-5.97703	3.24121	1	3.8636e-09	0.00125496	1	0.000114278
Helz	2.17301e-16	-0.0996003	-0.14295	0.0395454	0.0441186	0.0441186	5.49498e-15	-2.25756	-3.24013	1	0.0243252	0.00125964	1	1
Cyfip2	1.0976e-16	0.161728	-0.1441	0.0398871	0.0444998	0.0444998	2.75177e-15	3.63434	-3.23821	1	0.000302148	0.001268	1	1
Fgf1	-3.09025e-16	-0.0999909	-0.142844	0.0395436	0.0441165	0.0441165	-7.81481e-15	-2.26652	-3.23787	1	0.0237685	0.00126948	1	1
Abcd2	-2.26942e-16	-0.0648899	-0.143575	0.0397489	0.0443457	0.0443457	-5.70939e-15	-1.46328	-3.23763	1	0.143906	0.00127055	1	1
Gria3	-4.23017e-18	0.0421524	0.143909	0.0398559	0.044465	0.044465	-1.06137e-16	0.94799	3.23645	1	0.343509	0.0012757	1	1
2810039B14Rik	1.20866e-16	-0.0223945	-0.144152	0.0399319	0.0445498	0.0445498	3.0268e-15	-0.502684	-3.23575	1	0.615367	0.0012788	1	1
ERV2B1-CPo_LTR	5.12433e-16	0.0711068	-0.144674	0.0400798	0.0447148	0.0447148	1.27853e-14	1.59023	-3.23548	1	0.1123	0.00127999	1	1
Skint1	-2.40406e-15	-0.0499132	-0.143497	0.0398238	0.0444292	0.0444292	-6.03674e-14	-1.12343	-3.2298	1	0.261695	0.00130523	1	1
Pou3f3	-1.16221e-15	-0.100917	-0.142438	0.0395404	0.044113	0.044113	-2.9393e-14	-2.28769	-3.22894	1	0.0224963	0.0013091	1	1
Gm26259	5.21079e-16	-0.0152173	-0.14394	0.0399575	0.0445783	0.0445783	1.30408e-14	-0.341361	-3.22893	1	0.732949	0.00130916	1	1
Gm10925	4.50158e-17	0.00516157	-0.144115	0.0400136	0.044641	0.044641	1.12501e-15	0.115624	-3.22831	1	0.907988	0.00131196	1	1
Echdc2	2.33304e-16	-0.0500172	0.144247	0.040079	0.0447139	0.0447139	5.82111e-15	-1.11861	3.22599	1	0.263748	0.00132244	1	1
Mir344f	6.53473e-16	-0.068472	-0.14299	0.039734	0.044329	0.044329	1.64462e-14	-1.54463	-3.22565	1	0.122953	0.00132397	1	1
Slc38a5	8.2656e-16	0.155442	0.140783	0.039122	0.0436462	0.0436462	2.11278e-14	3.56141	3.22554	1	0.000397585	0.00132448	1	1
Baz1b	1.3201e-16	-0.130531	-0.141492	0.039329	0.0438772	0.0438772	3.35655e-15	-2.97491	-3.22474	1	0.00304651	0.00132813	1	1
Zbtb17	-6.03668e-16	0.00582931	0.143832	0.0399866	0.0446108	0.0446108	-1.50968e-14	0.13067	3.22416	1	0.896079	0.00133077	1	1
Gm5430	-3.56365e-17	0.136661	-0.143724	0.0399761	0.0445991	0.0445991	-8.91445e-16	3.06421	-3.22258	1	0.00227863	0.00133803	1	1
Cldn12	-6.78642e-17	-0.032045	-0.143421	0.0399008	0.044515	0.044515	-1.70082e-15	-0.71987	-3.22186	1	0.47188	0.00134131	1	1
Sez6	7.52945e-17	-0.103687	-0.141886	0.0395258	0.0440967	0.0440967	1.90495e-15	-2.35136	-3.21762	1	0.0190215	0.00136098	1	1
Myom2	-2.45402e-16	0.03864	0.143131	0.039876	0.0444874	0.0444874	-6.15412e-15	0.868561	3.21734	1	0.385428	0.00136228	1	1
Gm26909	1.15085e-16	-0.124256	0.143511	0.0400108	0.0446378	0.0446378	2.87634e-15	-2.78364	3.21501	1	0.00554162	0.00137318	1	1
Atp1a3	-2.80216e-16	0.0806968	-0.143752	0.0400792	0.0447141	0.0447141	-6.99157e-15	1.80473	-3.21491	1	0.0716095	0.00137365	1	1
Pdyn	-1.51413e-15	0.153736	0.140385	0.0391409	0.0436673	0.0436673	-3.8684e-14	3.52062	3.21489	1	0.000462605	0.00137376	1	1
Gprc5b	4.3873e-16	0.235364	0.137305	0.0382885	0.0427163	0.0427163	1.14585e-14	5.50994	3.21434	1	5.29645e-08	0.00137635	1	0.00156044
Hivep1	-2.04134e-15	-0.0969579	-0.141902	0.039571	0.0441472	0.0441472	-5.15868e-14	-2.19624	-3.2143	1	0.0284495	0.00137654	1	1
G430049J08Rik	1.07086e-16	-0.137117	-0.140823	0.0392809	0.0438235	0.0438235	2.72616e-15	-3.12884	-3.21342	1	0.00183855	0.00138069	1	1
Ubc	2.17989e-16	0.176146	0.139583	0.0389353	0.0434379	0.0434379	5.59877e-15	4.05513	3.21339	1	5.65913e-05	0.0013808	1	1
Stard13	7.64744e-16	-0.165685	0.142945	0.0398742	0.0444854	0.0444854	1.91789e-14	-3.72448	3.2133	1	0.000213837	0.00138124	1	1
Tmc7	5.36723e-17	0.00684379	-0.143461	0.0400213	0.0446496	0.0446496	1.34109e-15	0.153278	-3.21304	1	0.87823	0.00138247	1	1
Taf6	1.40717e-16	-0.194384	0.142434	0.0397377	0.0443332	0.0443332	3.54113e-15	-4.38463	3.21282	1	1.36798e-05	0.00138354	1	0.394907
Rbm33	1.3533e-16	-0.0292531	-0.143023	0.039914	0.0445299	0.0445299	3.39053e-15	-0.656933	-3.21184	1	0.511472	0.00138815	1	1
Egln1	-1.20678e-16	0.029941	-0.143541	0.0400633	0.0446964	0.0446964	-3.01218e-15	0.669875	-3.21148	1	0.503191	0.0013899	1	1
Gm28439	-1.04251e-16	0.0435743	-0.143578	0.040078	0.0447128	0.0447128	-2.6012e-15	0.974539	-3.21112	1	0.330175	0.0013916	1	1
4930445B16Rik	-7.41873e-17	-0.0853741	-0.141805	0.0396453	0.04423	0.04423	-1.87128e-15	-1.93023	-3.20608	1	0.0540409	0.00141579	1	1
Sh3bgrl3	3.30321e-16	0.126794	0.14073	0.0393649	0.0439173	0.0439173	8.39125e-15	2.88712	3.20443	1	0.00402532	0.00142377	1	1
Acvr1b	-1.6801e-16	-0.152342	-0.139923	0.0391574	0.0436857	0.0436857	-4.29063e-15	-3.48722	-3.20295	1	0.000523113	0.00143102	1	1
Osbpl3	2.78745e-16	0.00341922	-0.142989	0.0400159	0.0446435	0.0446435	6.96586e-15	0.0765895	-3.2029	1	0.938975	0.00143126	1	1
Kcnmb4os1	3.00676e-17	-0.0348255	0.14314	0.0400716	0.0447057	0.0447057	7.50346e-16	-0.778995	3.20183	1	0.436284	0.00143649	1	1
Mir1897	1.03451e-15	-0.136557	-0.140335	0.0392896	0.0438332	0.0438332	2.63304e-14	-3.11538	-3.20158	1	0.00192315	0.00143772	1	1
Nacc2	1.54758e-16	-0.0908015	-0.141483	0.0396139	0.044195	0.044195	3.90665e-15	-2.05456	-3.20134	1	0.040346	0.00143891	1	1
Sema6a	3.05681e-16	-0.141859	-0.140162	0.0392467	0.0437853	0.0437853	7.78872e-15	-3.23988	-3.20111	1	0.00126071	0.00144	1	1
Casp4	-4.36773e-16	-0.0823669	-0.141653	0.0396645	0.0442515	0.0442515	-1.10117e-14	-1.86133	-3.2011	1	0.0631769	0.00144007	1	1
Lppr2	1.47715e-17	0.197263	0.138299	0.0387268	0.0432053	0.0432053	3.81429e-16	4.5657	3.20098	1	6.022e-06	0.00144066	1	0.174668
Dtwd2	4.04131e-17	0.00664027	-0.142927	0.0400239	0.0446525	0.0446525	1.00972e-15	0.14871	-3.20089	1	0.881831	0.00144112	1	1
Zfp930	-1.31253e-16	-0.125543	-0.14061	0.0393757	0.0439293	0.0439293	-3.33334e-15	-2.85784	-3.20083	1	0.00441059	0.00144142	1	1
Gm2824	2.2743e-16	-0.182248	-0.138814	0.0388806	0.043377	0.043377	5.84944e-15	-4.20149	-3.20018	1	3.04719e-05	0.0014446	1	0.873996
Gjd2	2.48364e-16	-0.0283205	-0.142366	0.0399217	0.0445385	0.0445385	6.22126e-15	-0.635865	-3.19647	1	0.525102	0.00146298	1	1
Gm16249	1.20647e-16	-0.216462	-0.137304	0.0385189	0.0429734	0.0429734	3.13214e-15	-5.03711	-3.19509	1	6.2305e-07	0.00146987	1	0.0182442
Gm16340	-2.85379e-17	-0.140663	0.142457	0.039968	0.0445901	0.0445901	-7.1402e-16	-3.15458	3.1948	1	0.00168626	0.00147132	1	1
Tmsb4x	3.76587e-17	0.115498	0.140574	0.039452	0.0440144	0.0440144	9.54543e-16	2.6241	3.19381	1	0.00890494	0.00147629	1	1
Dgat2l6	2.35422e-16	0.224771	0.136882	0.0384239	0.0428674	0.0428674	6.12696e-15	5.24339	3.19315	1	2.17544e-07	0.00147965	1	0.00639057
Lipe	-1.51895e-17	-0.0662529	0.142801	0.0400895	0.0447256	0.0447256	-3.7889e-16	-1.48132	3.19282	1	0.139037	0.0014813	1	1
Gm5432	-2.51958e-16	-0.101728	0.142644	0.0400599	0.0446926	0.0446926	-6.28954e-15	-2.27617	3.19167	1	0.0231811	0.00148713	1	1
Id4	-6.24458e-16	0.0256288	-0.142626	0.040062	0.0446949	0.0446949	-1.55873e-14	0.573417	-3.19111	1	0.566573	0.00148993	1	1
Gm27675	-6.51917e-16	-0.145838	-0.139572	0.0392176	0.0437529	0.0437529	-1.66231e-14	-3.33323	-3.19001	1	0.000910316	0.00149555	1	1
Ppm1k	-3.06194e-17	-0.0500498	-0.141735	0.0398351	0.0444418	0.0444418	-7.68655e-16	-1.12619	-3.18924	1	0.260528	0.00149948	1	1
Gm24264	2.58893e-16	-0.00532373	-0.142311	0.039997	0.0446225	0.0446225	6.47281e-15	-0.119306	-3.18922	1	0.905072	0.00149954	1	1
Mir124-2hg	-2.43425e-16	-0.214137	-0.13712	0.038548	0.0430058	0.0430058	-6.31487e-15	-4.97925	-3.1884	1	8.31583e-07	0.00150373	1	0.0243205
Kcnn2	-1.61295e-15	-0.0574847	-0.141518	0.0398011	0.0444038	0.0444038	-4.05253e-14	-1.29459	-3.18707	1	0.195951	0.00151055	1	1
9830147E19Rik	8.307e-17	-0.158347	-0.139034	0.0391107	0.0436336	0.0436336	2.12397e-15	-3.62901	-3.1864	1	0.000308322	0.00151403	1	1
Plcb4	7.65938e-16	-0.120887	-0.140089	0.0394157	0.0439739	0.0439739	1.94323e-14	-2.74906	-3.18573	1	0.00615337	0.00151747	1	1
Clcn3	1.56928e-16	-0.00907865	-0.142058	0.0399878	0.0446122	0.0446122	3.9244e-15	-0.203502	-3.18429	1	0.838811	0.00152489	1	1
Uba1y	-3.65374e-16	-0.0645013	-0.141176	0.0397678	0.0443668	0.0443668	-9.18768e-15	-1.45382	-3.18201	1	0.14651	0.00153675	1	1
Exoc3	-1.09166e-16	-0.0593843	-0.141266	0.0397934	0.0443952	0.0443952	-2.74331e-15	-1.33763	-3.182	1	0.181515	0.00153682	1	1
Pi16	1.69204e-18	-0.161845	0.141605	0.0398939	0.0445074	0.0445074	4.24135e-17	-3.63637	3.18161	1	0.000299835	0.00153885	1	1
Gm9078	-2.88781e-16	0.0482378	0.141314	0.0398462	0.0444542	0.0444542	-7.24739e-15	1.08511	3.17887	1	0.278299	0.00155322	1	1
Spock2	-1.15776e-16	-0.219512	-0.136419	0.0384917	0.042943	0.042943	-3.00782e-15	-5.11171	-3.17675	1	4.27626e-07	0.00156444	1	0.0125363
Gm13848	1.0624e-15	0.0550294	-0.142016	0.0400921	0.0447285	0.0447285	2.64989e-14	1.2303	-3.17506	1	0.219059	0.00157345	1	1
Slc30a3	-3.91547e-16	0.325255	0.131156	0.0370327	0.0413154	0.0413154	-1.0573e-14	7.8725	3.17451	1	1.59062e-14	0.00157638	1	4.74067e-10
4930568A12Rik	-4.77545e-16	0.00537786	-0.141605	0.0400285	0.0446576	0.0446576	-1.19301e-14	0.120424	-3.17091	1	0.904187	0.0015957	1	1
Gm9864	-8.35516e-17	-0.0745619	-0.140493	0.0397182	0.0443113	0.0443113	-2.10361e-15	-1.68268	-3.17059	1	0.0929475	0.00159745	1	1
Wdr89	-1.51185e-16	-0.110683	0.141613	0.040048	0.0446793	0.0446793	-3.77509e-15	-2.47728	3.16953	1	0.0135082	0.00160318	1	1
Kalrn	6.19438e-17	0.0433572	0.140943	0.0398703	0.0444811	0.0444811	1.55363e-15	0.974733	3.16861	1	0.330078	0.00160817	1	1
Rdh1	-1.59698e-16	-0.118781	-0.139408	0.039437	0.0439976	0.0439976	-4.04946e-15	-2.69971	-3.16854	1	0.00713212	0.00160857	1	1
L2hgdh	-6.21528e-16	-0.117527	-0.13939	0.0394464	0.0440082	0.0440082	-1.57562e-14	-2.67057	-3.16737	1	0.00777382	0.00161494	1	1
Plekhg5	4.40548e-17	0.123681	0.139191	0.0394016	0.0439581	0.0439581	1.1181e-15	2.81361	3.16645	1	0.00505642	0.00161998	1	1
Plbd2	2.56039e-16	-0.0515014	0.141577	0.0400929	0.0447294	0.0447294	6.38614e-15	-1.1514	3.1652	1	0.250018	0.00162684	1	1
Gpr75	-1.08675e-16	-0.180739	-0.137363	0.0389093	0.043409	0.043409	-2.79303e-15	-4.16364	-3.16438	1	3.58271e-05	0.00163135	1	1
Gm11475	1.54177e-16	-0.0948905	0.141459	0.0400745	0.0447089	0.0447089	3.84725e-15	-2.1224	3.16401	1	0.0342054	0.00163342	1	1
Gm26815	1.72998e-16	-0.0755958	0.141508	0.0400922	0.0447286	0.0447286	4.31499e-15	-1.6901	3.1637	1	0.0915192	0.00163513	1	1
Gm13362	-2.0373e-16	0.0528199	-0.141479	0.0400939	0.0447305	0.0447305	-5.08132e-15	1.18085	-3.16292	1	0.238123	0.00163945	1	1
Gatm	3.48626e-16	-0.111874	0.141235	0.0400471	0.0446783	0.0446783	8.70541e-15	-2.50398	3.16114	1	0.0125399	0.00164929	1	1
Shprh	-1.04937e-17	-0.179172	-0.137199	0.0389267	0.0434283	0.0434283	-2.69576e-16	-4.12569	-3.15921	1	4.20885e-05	0.00166011	1	1
Vps13d	6.24396e-17	0.00960746	-0.141096	0.0400409	0.0446714	0.0446714	1.5594e-15	0.21507	-3.15853	1	0.829785	0.00166391	1	1
Styk1	-7.89646e-17	-0.126725	-0.138761	0.0393815	0.0439357	0.0439357	-2.00512e-15	-2.88434	-3.15827	1	0.00406057	0.00166535	1	1
Jag2	-8.42201e-17	-0.107856	-0.139175	0.0395179	0.0440879	0.0440879	-2.13119e-15	-2.44639	-3.15676	1	0.0147104	0.00167387	1	1
Mctp2	-3.524e-16	-0.0173036	-0.140709	0.0399705	0.0445928	0.0445928	-8.81651e-15	-0.388036	-3.15541	1	0.698125	0.00168152	1	1
Ptprt	-3.39341e-16	-0.00370779	-0.140821	0.0400102	0.0446371	0.0446371	-8.48136e-15	-0.0830651	-3.1548	1	0.933827	0.00168496	1	1
Fam135b	3.25989e-16	0.15645	0.137751	0.0391392	0.0436654	0.0436654	8.32897e-15	3.58294	3.15469	1	0.000366817	0.00168562	1	1
Gm23600	6.62242e-16	-0.0530289	-0.140172	0.0398317	0.044438	0.044438	1.6626e-14	-1.19332	-3.15434	1	0.233206	0.00168759	1	1
Gm6634	-3.00902e-16	-0.0615562	-0.139869	0.039792	0.0443937	0.0443937	-7.56186e-15	-1.3866	-3.15066	1	0.16607	0.00170867	1	1
Zim1	-1.10178e-16	-0.0261833	-0.140337	0.0399423	0.0445614	0.0445614	-2.75844e-15	-0.587577	-3.14929	1	0.557033	0.00171655	1	1
Anxa11	-6.06237e-16	0.0285241	0.140266	0.0399342	0.0445524	0.0445524	-1.51809e-14	0.640238	3.14834	1	0.522258	0.00172204	1	1
Gm15592	-2.25505e-16	-0.127004	-0.138257	0.0393834	0.0439378	0.0439378	-5.72589e-15	-2.89054	-3.14664	1	0.00398233	0.00173191	1	1
Eno1	1.29644e-16	-0.0243235	0.140594	0.0400708	0.0447047	0.0447047	3.23538e-15	-0.544093	3.14495	1	0.586576	0.00174181	1	1
Gcc2	3.50455e-17	-0.197133	-0.135912	0.0387508	0.0432321	0.0432321	9.04382e-16	-4.55988	-3.14377	1	6.18569e-06	0.00174871	1	0.179385
Wdr76	1.08588e-16	-0.0756962	-0.139279	0.0397204	0.0443138	0.0443138	2.73381e-15	-1.70818	-3.14301	1	0.0881101	0.00175319	1	1
Scn1a	2.04048e-17	-0.318932	-0.130202	0.03715	0.0414462	0.0414462	5.49254e-16	-7.69507	-3.14146	1	5.70091e-14	0.00176234	1	1.69847e-09
Scg3	-5.76591e-16	-0.204803	-0.13551	0.0386701	0.0431421	0.0431421	-1.49105e-14	-4.74719	-3.14102	1	2.57187e-06	0.00176494	1	0.0748672
Tnrc6b	1.05711e-18	-0.345121	-0.128612	0.0367185	0.0409648	0.0409648	2.87897e-17	-8.42482	-3.13958	1	2.5881e-16	0.00177354	1	7.71902e-12
Gm8502	-1.3339e-15	-0.0278683	-0.139861	0.0399391	0.0445579	0.0445579	-3.33983e-14	-0.62544	-3.13886	1	0.531916	0.00177783	1	1
Gm12940	-2.00341e-16	-0.195286	0.139121	0.0397403	0.044336	0.044336	-5.04127e-15	-4.40469	3.13787	1	1.25083e-05	0.00178373	1	0.36134
AW011738	-4.24069e-16	0.00363888	-0.140112	0.0400329	0.0446625	0.0446625	-1.0593e-14	0.0814751	-3.13712	1	0.935091	0.00178821	1	1
Gm29343	-5.55152e-17	-0.0806969	0.140322	0.0400941	0.0447307	0.0447307	-1.38462e-15	-1.80406	3.13704	1	0.071714	0.0017887	1	1
Gm13340	-2.09115e-17	0.0693481	-0.140321	0.0401001	0.0447374	0.0447374	-5.21482e-16	1.55011	-3.13654	1	0.121632	0.00179173	1	1
Zfp799	2.41266e-16	-0.0449241	-0.139475	0.0398731	0.0444842	0.0444842	6.05086e-15	-1.00989	-3.13539	1	0.312948	0.00179862	1	1
Gm26597	1.30226e-16	-0.0392555	0.140008	0.0400922	0.0447286	0.0447286	3.24815e-15	-0.877637	3.13017	1	0.380486	0.00183042	1	1
Crebrf	2.24134e-17	-0.119706	-0.137729	0.0394433	0.0440047	0.0440047	5.68243e-16	-2.7203	-3.12986	1	0.00670792	0.00183227	1	1
6530403H02Rik	1.98161e-15	-0.178776	0.13904	0.0398256	0.0444312	0.0444312	4.97572e-14	-4.02367	3.12932	1	6.44874e-05	0.00183558	1	1
Shisa3	-7.15926e-17	0.0747644	-0.139964	0.0400994	0.0447367	0.0447367	-1.78538e-15	1.67121	-3.12861	1	0.0951922	0.00183995	1	1
Cnih3	5.20264e-16	0.0855376	0.138403	0.0396692	0.0442567	0.0442567	1.31151e-14	1.93276	3.12728	1	0.0537275	0.00184818	1	1
Fer	3.55414e-16	-0.140781	-0.137035	0.0392819	0.0438246	0.0438246	9.04779e-15	-3.21237	-3.12688	1	0.00138567	0.00185064	1	1
Rnf216	-7.66469e-17	0.0442318	-0.139786	0.0400974	0.0447344	0.0447344	-1.91152e-15	0.988765	-3.12479	1	0.32317	0.00186363	1	1
Lrrc75b	-1.46115e-16	-0.109658	-0.137747	0.0395162	0.044086	0.044086	-3.69761e-15	-2.48737	-3.12451	1	0.0131347	0.00186542	1	1
Gm13196	-4.38319e-16	0.00302265	-0.139506	0.0400348	0.0446646	0.0446646	-1.09484e-14	0.0676743	-3.12341	1	0.946067	0.00187231	1	1
Rnf8	-2.35143e-17	-0.0671227	-0.13854	0.0397724	0.0443718	0.0443718	-5.91223e-16	-1.51273	-3.12226	1	0.130865	0.0018795	1	1
L1-3_Cpo	-2.02949e-16	0.096778	-0.139484	0.0400798	0.0447149	0.0447149	-5.06362e-15	2.16434	-3.11942	1	0.0308252	0.00189741	1	1
Cpne6	9.56588e-17	-0.0157992	0.139364	0.0400628	0.0446959	0.0446959	2.38772e-15	-0.353482	3.11805	1	0.723849	0.0019061	1	1
Blnk	-3.77282e-16	0.382814	0.1254	0.0360489	0.0402177	0.0402177	-1.04658e-14	9.51854	3.11803	1	4.01148e-20	0.00190622	1	1.19783e-15
MUSID2	-2.0247e-16	-0.271873	0.136349	0.0391966	0.0437294	0.0437294	-5.16551e-15	-6.21716	3.11801	1	9.38244e-10	0.00190638	1	2.78048e-05
Rnd1	-1.51021e-16	-0.0595158	-0.13843	0.039812	0.0444161	0.0444161	-3.79335e-15	-1.33996	-3.11668	1	0.180756	0.00191488	1	1
Rnf13	-1.36499e-16	-0.159739	-0.136025	0.039124	0.0436485	0.0436485	-3.48889e-15	-3.65966	-3.11637	1	0.000274386	0.00191683	1	1
SQR4_MM	-1.83909e-15	0.062775	-0.139379	0.0401055	0.0447434	0.0447434	-4.58564e-14	1.403	-3.11507	1	0.161125	0.0019252	1	1
MARE9	-8.04831e-16	0.0572674	-0.13937	0.0401052	0.0447431	0.0447431	-2.0068e-14	1.27992	-3.1149	1	0.20106	0.00192629	1	1
Ccdc50-ps	1.62841e-16	0.0905865	-0.13924	0.0400889	0.044725	0.044725	4.062e-15	2.02541	-3.11325	1	0.0432592	0.0019369	1	1
Gm10719	-4.56846e-16	-0.0713058	-0.137981	0.0397539	0.0443512	0.0443512	-1.14919e-14	-1.60775	-3.11109	1	0.108406	0.00195087	1	1
Bcr	-2.1941e-16	0.0262648	-0.139015	0.040082	0.0447172	0.0447172	-5.47402e-15	0.587354	-3.10876	1	0.557183	0.0019661	1	1
Ube2h	-1.55137e-15	0.0471792	-0.139072	0.0401027	0.0447404	0.0447404	-3.86848e-14	1.05451	-3.10841	1	0.292066	0.00196839	1	1
Letm2	-1.09738e-17	-0.0955884	-0.137361	0.0396141	0.0441952	0.0441952	-2.77017e-16	-2.16287	-3.10805	1	0.0309385	0.00197078	1	1
Gm11548	-7.13165e-16	0.0214354	-0.138931	0.040075	0.0447094	0.0447094	-1.77957e-14	0.479437	-3.10742	1	0.631799	0.00197487	1	1
Ncan	-1.09233e-16	0.311147	0.129251	0.0372885	0.0416007	0.0416007	-2.9294e-15	7.47936	3.10693	1	2.60872e-13	0.00197811	1	7.76825e-09
Cr1l	7.02278e-18	-0.207672	-0.133973	0.0386526	0.0431225	0.0431225	1.8169e-16	-4.81585	-3.10679	1	1.85032e-06	0.00197902	1	0.0539348
Rpl5	5.33783e-17	-0.0910517	0.138855	0.0400899	0.0447261	0.0447261	1.33146e-15	-2.03576	3.10457	1	0.0422052	0.00199372	1	1
Gm14342	1.41229e-16	-0.01413	-0.13851	0.0399937	0.0446187	0.0446187	3.53129e-15	-0.316683	-3.1043	1	0.751592	0.00199549	1	1
Gm23747	-6.98276e-16	0.110595	-0.138711	0.040059	0.0446916	0.0446916	-1.74312e-14	2.47464	-3.10373	1	0.0136075	0.00199928	1	1
Arhgef25	2.49417e-16	-0.0706681	0.138804	0.0401063	0.0447444	0.0447444	6.2189e-15	-1.57937	3.10215	1	0.114768	0.00200982	1	1
Hnmt	-1.22157e-16	-0.0822294	-0.137362	0.0396964	0.0442871	0.0442871	-3.07728e-15	-1.85674	-3.10162	1	0.0638299	0.00201336	1	1
Rnf144b	7.81286e-17	-0.0935033	-0.137098	0.0396294	0.0442123	0.0442123	1.97148e-15	-2.11487	-3.10091	1	0.034845	0.00201812	1	1
Grk1	2.3162e-16	-0.161709	-0.135266	0.0391124	0.0436356	0.0436356	5.92189e-15	-3.70589	-3.09991	1	0.000229774	0.00202483	1	1
Lcp1	2.55203e-17	-0.161613	-0.135142	0.0391144	0.0436377	0.0436377	6.52453e-16	-3.70352	-3.09692	1	0.000231882	0.00204509	1	1
L1MdGf_I	-7.97721e-16	-0.0128015	-0.138189	0.0399996	0.0446254	0.0446254	-1.99432e-14	-0.286865	-3.09665	1	0.774313	0.00204692	1	1
Prdm10	1.25812e-16	0.129188	0.136047	0.039384	0.0439386	0.0439386	3.1945e-15	2.94021	3.0963	1	0.00340395	0.00204929	1	1
Srcap	-2.97349e-16	-0.0532859	-0.137647	0.0398473	0.0444554	0.0444554	-7.46221e-15	-1.19864	-3.09629	1	0.231134	0.00204935	1	1
Nup54	-6.85415e-17	0.015849	-0.13832	0.0400685	0.0447022	0.0447022	-1.71061e-15	0.354546	-3.09425	1	0.723052	0.00206328	1	1
SATMIN	2.29563e-16	-0.00908138	-0.138074	0.0400112	0.0446383	0.0446383	5.73746e-15	-0.203444	-3.09318	1	0.838856	0.00207062	1	1
Nckap5	1.67657e-17	-0.0657372	-0.137133	0.0397893	0.0443907	0.0443907	4.21363e-16	-1.48088	-3.08922	1	0.139154	0.00209796	1	1
Adarb2	-1.61194e-16	-0.0541169	-0.137321	0.0398455	0.0444534	0.0444534	-4.04548e-15	-1.21738	-3.0891	1	0.223928	0.00209878	1	1
Gm1821	-1.83093e-16	0.00288085	0.137949	0.0400289	0.044658	0.044658	-4.57402e-15	0.0645091	3.08901	1	0.948586	0.00209943	1	1
Elmod1	-5.1484e-17	-0.139935	-0.135418	0.0393023	0.0438474	0.0438474	-1.30995e-15	-3.19141	-3.08838	1	0.00148842	0.00210378	1	1
CAVID2B2	1.97942e-15	0.113127	-0.137976	0.0400564	0.0446887	0.0446887	4.94159e-14	2.53144	-3.0875	1	0.0116093	0.00210999	1	1
Gria4	1.50722e-17	-0.219611	-0.132685	0.0385272	0.0429826	0.0429826	3.91211e-16	-5.10929	-3.08694	1	4.32914e-07	0.00211389	1	0.0126904
Ovgp1	4.33704e-16	-0.094735	-0.136428	0.0396264	0.044209	0.044209	1.09448e-14	-2.14289	-3.08598	1	0.0325163	0.0021206	1	1
Psd2	-2.96394e-16	-0.0673106	-0.136944	0.0397824	0.044383	0.044383	-7.45038e-15	-1.51659	-3.0855	1	0.129888	0.00212398	1	1
Acvr1c	7.96273e-16	0.202289	0.133198	0.0387199	0.0431976	0.0431976	2.05649e-14	4.68288	3.08346	1	3.48807e-06	0.00213838	1	0.101412
Bmp7	-1.38964e-16	-0.00456104	-0.137615	0.0400264	0.0446552	0.0446552	-3.47181e-15	-0.102139	-3.08171	1	0.91868	0.00215076	1	1
Ccdc82	-1.05933e-16	-0.099484	-0.136068	0.0395983	0.0441776	0.0441776	-2.67519e-15	-2.25191	-3.08003	1	0.0246821	0.00216279	1	1
Pcdh20	-7.33047e-17	0.059203	0.136803	0.0398245	0.04443	0.04443	-1.84069e-15	1.3325	3.07906	1	0.183192	0.00216973	1	1
Sytl4	-7.16461e-17	-0.0695372	-0.136461	0.0397739	0.0443735	0.0443735	-1.80133e-15	-1.56709	-3.07528	1	0.117612	0.00219697	1	1
Skint3	-4.78865e-16	-0.0873985	-0.13602	0.0396751	0.0442633	0.0442633	-1.20697e-14	-1.97451	-3.07297	1	0.0487733	0.00221378	1	1
Ttf1	-3.17128e-16	0.000873498	0.137239	0.0400381	0.0446682	0.0446682	-7.92066e-15	0.0195552	3.07242	1	0.984405	0.00221782	1	1
Tbc1d30	-1.41942e-16	-0.13868	-0.134707	0.0393185	0.0438654	0.0438654	-3.61006e-15	-3.16148	-3.07091	1	0.00164745	0.00222891	1	1
Gm28362	3.93005e-16	-0.192831	-0.132983	0.0388241	0.0433139	0.0433139	1.01227e-14	-4.45195	-3.07021	1	1.01167e-05	0.00223399	1	0.292607
Gm15411	1.33817e-16	-0.0464752	0.137387	0.0401104	0.0447489	0.0447489	3.33621e-15	-1.03858	3.07017	1	0.299413	0.00223433	1	1
Gm5901	-8.35336e-17	0.0510212	-0.137388	0.0401126	0.0447514	0.0447514	-2.08248e-15	1.1401	-3.07002	1	0.254691	0.00223545	1	1
1700129L04Rik	-6.31612e-16	-0.0129966	-0.137021	0.0400059	0.0446323	0.0446323	-1.5788e-14	-0.291193	-3.07	1	0.771002	0.00223554	1	1
4930581F22Rik	-1.05097e-15	-0.117475	0.137127	0.0400498	0.0446813	0.0446813	-2.62417e-14	-2.62918	3.06901	1	0.00877443	0.00224288	1	1
Pld5	2.91669e-16	-0.102946	-0.135514	0.0395794	0.0441565	0.0441565	7.36922e-15	-2.3314	-3.06895	1	0.0200567	0.00224331	1	1
Nedd4	1.41314e-16	-0.173998	-0.133473	0.0390113	0.0435227	0.0435227	3.62238e-15	-3.99786	-3.06675	1	7.17347e-05	0.00225961	1	1
Glod4	2.78417e-16	-0.0308636	-0.136659	0.0399479	0.0445676	0.0445676	6.9695e-15	-0.692511	-3.06633	1	0.488879	0.00226278	1	1
Nav1	1.8434e-16	-0.325606	-0.126776	0.0370795	0.0413675	0.0413675	4.97149e-15	-7.87105	-3.06463	1	1.60753e-14	0.0022755	1	4.79092e-10
Slc48a1	-5.27194e-16	-0.154672	-0.133948	0.0391876	0.0437194	0.0437194	-1.34531e-14	-3.53783	-3.0638	1	0.00043404	0.0022817	1	1
Colec12	-4.16682e-16	-0.073	-0.135891	0.0397591	0.0443571	0.0443571	-1.04802e-14	-1.64574	-3.06356	1	0.100332	0.0022835	1	1
Ruvbl1	-4.43817e-16	-0.0931633	0.137012	0.0400945	0.0447312	0.0447312	-1.10693e-14	-2.08274	3.06301	1	0.0376907	0.00228766	1	1
Kcnmb2	-1.41919e-15	-0.137299	-0.134392	0.0393324	0.0438809	0.0438809	-3.60819e-14	-3.1289	-3.06266	1	0.00183821	0.00229027	1	1
Gm14740	2.96897e-16	-0.081203	-0.135643	0.0397146	0.0443074	0.0443074	7.47576e-15	-1.83272	-3.0614	1	0.0673309	0.00229978	1	1
Gm5607	-2.07629e-16	-0.143758	-0.134148	0.0392807	0.0438233	0.0438233	-5.28578e-15	-3.2804	-3.06112	1	0.00109557	0.00230189	1	1
Rpp25	-8.03616e-16	-0.103294	-0.135087	0.0395802	0.0441574	0.0441574	-2.03035e-14	-2.33922	-3.05921	1	0.0196451	0.00231642	1	1
Ufl1	6.43974e-16	-0.144762	-0.134001	0.0392734	0.0438152	0.0438152	1.63972e-14	-3.30392	-3.05833	1	0.00100918	0.00232311	1	1
Vstm2b	4.11055e-16	-0.120857	-0.13451	0.03946	0.0440233	0.0440233	1.0417e-14	-2.74529	-3.05543	1	0.00622352	0.00234534	1	1
Gm6075	4.88095e-17	0.0223733	-0.136631	0.0400885	0.0447245	0.0447245	1.21754e-15	0.500247	-3.05495	1	0.617081	0.00234904	1	1
Fbxo32	1.04404e-16	-0.00870909	-0.136403	0.0400219	0.0446502	0.0446502	2.60867e-15	-0.195051	-3.05493	1	0.845417	0.0023492	1	1
X30_DNA	-1.63255e-15	0.0430078	-0.136693	0.0401115	0.0447502	0.0447502	-4.07003e-14	0.961065	-3.05458	1	0.3369	0.00235191	1	1
4930554G24Rik	1.93392e-16	-0.0226579	-0.13621	0.0399798	0.0446032	0.0446032	4.83723e-15	-0.507989	-3.05381	1	0.611644	0.00235785	1	1
Gm29491	-3.98475e-16	-0.0299974	0.136502	0.0400998	0.0447371	0.0447371	-9.93709e-15	-0.670526	3.05121	1	0.502776	0.00237803	1	1
Ywhah	3.30583e-16	-0.157123	0.135813	0.0399291	0.0445467	0.0445467	8.27924e-15	-3.52716	3.04877	1	0.000451545	0.00239713	1	1
Eme2	-5.78166e-16	0.0528905	0.135579	0.0398627	0.0444726	0.0444726	-1.45039e-14	1.18928	3.04859	1	0.23479	0.0023986	1	1
Grik4	3.46496e-17	-0.172951	0.135536	0.0398617	0.0444714	0.0444714	8.69247e-16	-3.88904	3.04771	1	0.000111676	0.00240552	1	1
Cd200r3	-4.32015e-16	-0.00881516	-0.136019	0.0400238	0.0446523	0.0446523	-1.0794e-14	-0.197418	-3.04618	1	0.843566	0.00241757	1	1
Gm9750	1.23398e-16	-0.141304	-0.133554	0.0393061	0.0438517	0.0438517	3.13941e-15	-3.22232	-3.04559	1	0.00133922	0.00242226	1	1
Gm10025	9.06944e-17	-0.0802547	-0.134971	0.0397248	0.0443188	0.0443188	2.28307e-15	-1.81085	-3.04547	1	0.0706549	0.00242324	1	1
Mrgprc2-ps	1.08106e-16	-0.0864331	-0.134798	0.0396897	0.0442796	0.0442796	2.72378e-15	-1.95198	-3.04424	1	0.0513965	0.00243299	1	1
Slc23a2	-2.39684e-16	0.00468348	-0.136024	0.040058	0.0446905	0.0446905	-5.98341e-15	0.104798	-3.04368	1	0.91657	0.00243745	1	1
Slc26a10	3.66778e-16	0.182704	0.13219	0.0389361	0.0434389	0.0434389	9.42e-15	4.20601	3.04312	1	2.98863e-05	0.00244192	1	0.857408
Cox19	-1.94793e-16	-0.00522457	0.135953	0.0400596	0.0446923	0.0446923	-4.86257e-15	-0.116901	3.04198	1	0.906977	0.00245103	1	1
Sema4g	8.61093e-16	-0.143468	-0.133293	0.0392902	0.0438338	0.0438338	2.19163e-14	-3.27301	-3.04086	1	0.00112412	0.00246006	1	1
Specc1	-9.21217e-16	-0.0583063	-0.135148	0.0398399	0.0444471	0.0444471	-2.3123e-14	-1.31181	-3.04065	1	0.190076	0.00246178	1	1
2310022A10Rik	-2.35889e-16	0.0542387	0.135106	0.0398595	0.044469	0.044469	-5.91801e-15	1.2197	3.0382	1	0.223051	0.00248152	1	1
Slc25a20	-3.95739e-16	-0.0788802	-0.13465	0.0397349	0.0443301	0.0443301	-9.95946e-15	-1.77938	-3.03744	1	0.0756738	0.00248772	1	1
Lrrc3b	5.74329e-16	-0.0789421	-0.134551	0.0397353	0.0443304	0.0443304	1.44539e-14	-1.78077	-3.03518	1	0.0754475	0.00250612	1	1
Gm21846	8.71335e-17	-0.0669227	-0.134623	0.0398002	0.0444028	0.0444028	2.18927e-15	-1.50717	-3.03185	1	0.132283	0.00253356	1	1
Nrp2	-8.92276e-17	0.289562	0.127333	0.0376464	0.042	0.042	-2.37015e-15	6.89433	3.03173	1	1.35285e-11	0.00253458	1	4.02109e-07
Gm17203	1.59327e-16	-0.0565426	-0.134698	0.0398513	0.0444599	0.0444599	3.99803e-15	-1.27177	-3.02965	1	0.20394	0.00255183	1	1
Gm12080	1.66743e-16	-0.0225847	-0.13514	0.0399864	0.0446106	0.0446106	4.16999e-15	-0.506264	-3.02932	1	0.612854	0.00255456	1	1
Trip10	-3.77412e-16	0.19169	0.131293	0.0388516	0.0433445	0.0433445	-9.71422e-15	4.42247	3.02907	1	1.15512e-05	0.00255667	1	0.333853
Serpina3n	-4.46891e-16	0.111789	0.13354	0.0395333	0.0441051	0.0441051	-1.13042e-14	2.5346	3.02778	1	0.011506	0.00256741	1	1
Zfp114	3.62203e-17	-0.138162	0.135021	0.0399994	0.0446251	0.0446251	9.0552e-16	-3.09606	3.02566	1	0.00205088	0.00258518	1	1
Pdxk	3.77576e-17	-0.154758	-0.132324	0.0392005	0.0437338	0.0437338	9.63193e-16	-3.53864	-3.02566	1	0.000432728	0.0025852	1	1
Spink7	-2.0899e-16	0.106136	-0.135283	0.0400802	0.0447152	0.0447152	-5.21429e-15	2.3736	-3.02544	1	0.0179238	0.00258701	1	1
Zyg11b	-1.90483e-16	0.0711258	-0.135378	0.0401209	0.0447607	0.0447607	-4.74771e-15	1.58903	-3.0245	1	0.112572	0.00259503	1	1
Eif5a	-5.78017e-17	0.178238	0.131543	0.0389866	0.0434952	0.0434952	-1.4826e-15	4.09789	3.02432	1	4.73207e-05	0.00259651	1	1
Tmem184b	2.54483e-16	-0.0318283	-0.134785	0.0399557	0.0445764	0.0445764	6.36912e-15	-0.714017	-3.02369	1	0.475489	0.00260186	1	1
Ddx24	2.81739e-16	0.101608	0.133571	0.0396027	0.0441825	0.0441825	7.11413e-15	2.29973	3.02317	1	0.0217996	0.00260629	1	1
Dmtf1	-5.89516e-16	0.0393936	-0.135299	0.0401154	0.0447545	0.0447545	-1.46955e-14	0.880216	-3.02315	1	0.379089	0.00260645	1	1
Slc36a4	3.7412e-16	-0.107697	-0.133395	0.0395629	0.0441381	0.0441381	9.45633e-15	-2.44001	-3.02221	1	0.01497	0.0026144	1	1
Ccna2	-9.6021e-18	0.0487597	-0.135259	0.0401216	0.0447614	0.0447614	-2.39325e-16	1.08933	-3.02179	1	0.27644	0.00261802	1	1
Inpp4a	-1.25157e-16	-0.113259	0.135047	0.0400665	0.0446999	0.0446999	-3.12373e-15	-2.53376	3.02118	1	0.0115332	0.00262317	1	1
Ecd	-7.24435e-16	-0.0189366	0.135066	0.0400911	0.0447274	0.0447274	-1.80697e-14	-0.423378	3.01975	1	0.672168	0.00263538	1	1
Wwc1	4.01118e-16	-0.178903	0.134195	0.0398364	0.0444433	0.0444433	1.00691e-14	-4.02541	3.01947	1	6.40239e-05	0.00263783	1	1
E130307A14Rik	4.00487e-17	-0.114587	-0.133045	0.0395171	0.044087	0.044087	1.01345e-15	-2.59911	-3.01777	1	0.00957229	0.00265245	1	1
Eif4a-ps4	2.97386e-16	0.221302	0.129675	0.0385364	0.0429929	0.0429929	7.71701e-15	5.1474	3.0162	1	3.56564e-07	0.00266601	1	0.010462
Gm23187	3.10084e-17	-0.00452324	0.134808	0.0400643	0.0446975	0.0446975	7.73967e-16	-0.101197	3.01602	1	0.919427	0.0026676	1	1
Actr3b	4.68338e-16	-0.204131	0.133514	0.0397006	0.0442917	0.0442917	1.17968e-14	-4.60879	3.01442	1	4.93322e-06	0.0026815	1	0.143177
Zdhhc21	3.99145e-16	-0.16481	-0.131478	0.0391162	0.0436397	0.0436397	1.02041e-14	-3.7766	-3.01281	1	0.000174518	0.00269552	1	1
Slc38a6	6.57562e-16	-0.159626	-0.131628	0.0391626	0.0436915	0.0436915	1.67906e-14	-3.65349	-3.01267	1	0.000280923	0.00269673	1	1
1190005I06Rik	-9.77418e-17	-0.107301	0.134711	0.04008	0.044715	0.044715	-2.43867e-15	-2.39967	3.01265	1	0.0167081	0.00269689	1	1
Rtca	-3.13777e-17	-0.145637	0.134207	0.0399767	0.0445997	0.0445997	-7.849e-16	-3.26542	3.00915	1	0.00115414	0.00272771	1	1
B1_Mur2	1.49736e-16	0.0114657	0.134321	0.0400259	0.0446547	0.0446547	3.74098e-15	0.256763	3.00799	1	0.797448	0.00273795	1	1
Nenf	-6.47367e-16	-0.139491	-0.131972	0.039334	0.0438827	0.0438827	-1.64582e-14	-3.17871	-3.00739	1	0.00155406	0.00274335	1	1
Pikfyve	-3.49143e-16	-0.116376	-0.132531	0.0395081	0.044077	0.044077	-8.83725e-15	-2.64029	-3.0068	1	0.00849517	0.00274855	1	1
Alg9	-2.6408e-16	-0.108089	-0.132706	0.0395653	0.0441408	0.0441408	-6.67454e-15	-2.44874	-3.00643	1	0.0146156	0.00275184	1	1
Cldn22	5.66063e-16	-0.105986	0.134419	0.0400835	0.044719	0.044719	1.41221e-14	-2.37004	3.00587	1	0.0180959	0.00275688	1	1
D030068K23Rik	-2.82934e-16	-0.144725	-0.131625	0.0392932	0.0438372	0.0438372	-7.20059e-15	-3.30142	-3.0026	1	0.00101802	0.00278626	1	1
Kdm5d	2.77662e-16	-0.00539064	-0.134106	0.0400439	0.0446748	0.0446748	6.93392e-15	-0.120664	-3.00183	1	0.903997	0.00279318	1	1
Agps	-7.2213e-16	-0.0799966	-0.133051	0.0397397	0.0443354	0.0443354	-1.81715e-14	-1.80435	-3.00102	1	0.0716683	0.00280047	1	1
Creg1	1.81786e-16	-0.0597209	-0.133399	0.0398445	0.0444523	0.0444523	4.56239e-15	-1.34348	-3.00094	1	0.179615	0.0028012	1	1
Abr	-2.02329e-16	0.41704	0.118522	0.0354327	0.0395303	0.0395303	-5.71024e-15	10.5499	2.99827	1	5.10936e-24	0.00282552	1	1.52683e-19
Btbd11	-4.7838e-16	-0.0378873	-0.133595	0.0399397	0.0445585	0.0445585	-1.19776e-14	-0.850283	-2.99819	1	0.395501	0.00282625	1	1
Tceal5	7.36836e-16	0.00733455	-0.133933	0.0400751	0.0447096	0.0447096	1.83864e-14	0.164049	-2.99561	1	0.869747	0.00284991	1	1
Mt1	-4.99236e-17	0.181065	0.130236	0.03897	0.0434766	0.0434766	-1.28108e-15	4.16465	2.99555	1	3.5673e-05	0.00285046	1	1
Magi3	3.57689e-16	-0.0878762	-0.132604	0.0396966	0.0442873	0.0442873	9.01057e-15	-1.98423	-2.99417	1	0.047677	0.00286317	1	1
Gm6305	-5.17098e-16	-0.100286	0.133899	0.0400956	0.0447324	0.0447324	-1.28966e-14	-2.24191	2.99333	1	0.0253255	0.00287097	1	1
Reps2	1.22927e-15	-0.152383	-0.130849	0.0392337	0.0437709	0.0437709	3.1332e-14	-3.48139	-2.9894	1	0.000534401	0.0029076	1	1
Hibch	-4.37385e-17	-0.0132907	-0.133447	0.0400256	0.0446543	0.0446543	-1.09276e-15	-0.297634	-2.98845	1	0.766083	0.00291653	1	1
L1MdA_V	5.59846e-17	0.0518755	-0.133781	0.0401295	0.0447702	0.0447702	1.3951e-15	1.15871	-2.98818	1	0.247029	0.00291912	1	1
Gtf3c3	7.31749e-16	-0.0388619	-0.133053	0.0399391	0.0445579	0.0445579	1.83216e-14	-0.872167	-2.98606	1	0.38346	0.00293909	1	1
Gm23380	-4.53917e-17	-0.0477195	-0.132865	0.0399033	0.0445179	0.0445179	-1.13754e-15	-1.07192	-2.98453	1	0.284181	0.00295362	1	1
Kif24	1.54107e-16	-0.0399748	-0.132893	0.0399356	0.044554	0.044554	3.85889e-15	-0.897223	-2.98274	1	0.369953	0.00297075	1	1
Zfp395	3.61974e-16	-0.0543957	-0.132628	0.0398748	0.0444861	0.0444861	9.07776e-15	-1.22276	-2.98134	1	0.221893	0.00298415	1	1
Daglb	-3.71032e-16	0.286186	0.125412	0.0377179	0.0420797	0.0420797	-9.83703e-15	6.80104	2.98035	1	2.47843e-11	0.00299362	1	7.36467e-07
BC018473	1.97649e-16	-0.136	-0.130808	0.0393716	0.0439247	0.0439247	5.02009e-15	-3.0962	-2.978	1	0.00204993	0.00301638	1	1
Trps1	2.64934e-16	-0.240733	0.131052	0.0394563	0.0440191	0.0440191	6.71462e-15	-5.46882	2.97716	1	6.61164e-08	0.00302453	1	0.00194713
Rps20	-6.36864e-17	0.0517233	-0.133189	0.0401321	0.0447732	0.0447732	-1.58692e-15	1.15523	-2.97475	1	0.248448	0.00304801	1	1
L1M3D_5	3.93823e-16	0.0172397	-0.133041	0.0400986	0.0447358	0.0447358	9.82136e-15	0.385367	-2.97393	1	0.7001	0.00305604	1	1
Gm28352	-3.68799e-16	0.102674	-0.133001	0.0400947	0.0447314	0.0447314	-9.1982e-15	2.29534	-2.97332	1	0.0220516	0.00306205	1	1
Rad54b	-4.93027e-16	0.0612179	-0.133099	0.0401334	0.0447746	0.0447746	-1.22847e-14	1.36725	-2.97265	1	0.172051	0.00306865	1	1
Ostf1	1.22477e-16	-0.135339	-0.130565	0.0393789	0.0439328	0.0439328	3.11023e-15	-3.08058	-2.97193	1	0.00215883	0.00307572	1	1
Gm21814	2.31523e-16	-0.132701	-0.130588	0.0393996	0.043956	0.043956	5.87628e-15	-3.01896	-2.97088	1	0.00264218	0.0030861	1	1
Gm28321	2.16235e-16	-0.0697121	-0.131906	0.0398038	0.0444069	0.0444069	5.43252e-15	-1.56985	-2.97039	1	0.116968	0.00309099	1	1
Smg7	-1.18655e-16	0.155194	-0.132372	0.0399459	0.0445654	0.0445654	-2.97039e-15	3.48239	-2.97028	1	0.000532454	0.00309206	1	1
Pde3a	-3.81931e-16	-0.0817071	-0.131645	0.0397396	0.0443353	0.0443353	-9.61084e-15	-1.84294	-2.96931	1	0.0658223	0.00310172	1	1
Gm29335	2.98964e-16	-0.200905	0.131517	0.0397232	0.044317	0.044317	7.52616e-15	-4.53336	2.96764	1	6.98711e-06	0.00311843	1	0.202508
Pou3f1	-2.06016e-15	0.0781696	-0.132788	0.0401272	0.0447676	0.0447676	-5.13408e-14	1.74612	-2.96617	1	0.0812928	0.00313312	1	1
Gm26903	1.77868e-17	-0.0809674	-0.131494	0.0397449	0.0443412	0.0443412	4.47524e-16	-1.82601	-2.96551	1	0.0683366	0.00313976	1	1
Atp6v0b	3.30641e-16	-0.135835	0.132258	0.0400151	0.0446426	0.0446426	8.26291e-15	-3.04272	2.96261	1	0.00244515	0.00316909	1	1
Lrba	-1.52418e-16	-0.0568187	-0.131773	0.039869	0.0444796	0.0444796	-3.82296e-15	-1.27741	-2.96255	1	0.201943	0.00316963	1	1
4930522L14Rik	6.11409e-16	-0.0887206	-0.131168	0.0397016	0.0442928	0.0442928	1.54001e-14	-2.00304	-2.96137	1	0.0456137	0.0031816	1	1
Gm561	1.08923e-16	-0.108439	-0.130742	0.0395775	0.0441544	0.0441544	2.75214e-15	-2.45591	-2.96103	1	0.0143302	0.00318512	1	1
Rasl10a	1.14756e-15	-0.0181053	0.132449	0.0401031	0.0447408	0.0447408	2.86153e-14	-0.404672	2.96037	1	0.68586	0.00319188	1	1
Eef1b2	-2.45327e-16	0.0940403	-0.132417	0.0401108	0.0447494	0.0447494	-6.11624e-15	2.10149	-2.95907	1	0.036007	0.00320513	1	1
Akap11	-1.86981e-16	-0.0451197	-0.131785	0.0399212	0.0445379	0.0445379	-4.68376e-15	-1.01306	-2.95895	1	0.311431	0.00320641	1	1
Srm	-1.20752e-15	-0.016073	0.132335	0.0401002	0.0447376	0.0447376	-3.01125e-14	-0.359272	2.95804	1	0.719516	0.00321576	1	1
Igfbp7	1.79895e-16	-0.00663867	-0.132156	0.0400514	0.0446832	0.0446832	4.4916e-15	-0.148572	-2.95762	1	0.88194	0.00322	1	1
Snx8	6.25851e-16	-0.132365	-0.130016	0.0394068	0.0439639	0.0439639	1.58818e-14	-3.01077	-2.95733	1	0.00271343	0.00322303	1	1
Kcnq4	1.02369e-17	-0.0615011	-0.131449	0.0398486	0.0444568	0.0444568	2.56895e-16	-1.38339	-2.95678	1	0.167051	0.00322872	1	1
2010315B03Rik	-5.9919e-17	-0.19138	-0.128255	0.0388822	0.0433787	0.0433787	-1.54104e-15	-4.41185	-2.95663	1	1.21141e-05	0.00323029	1	0.34999
Ano3	1.10429e-16	-0.158541	0.131617	0.0399343	0.0445525	0.0445525	2.76527e-15	-3.55852	2.9542	1	0.000401895	0.00325547	1	1
Kbtbd11	-6.99494e-17	-0.00637856	0.132055	0.0400831	0.0447184	0.0447184	-1.74511e-15	-0.142638	2.95304	1	0.886623	0.00326753	1	1
Reep5	1.46264e-16	-0.210434	-0.127441	0.038683	0.0431565	0.0431565	3.78109e-15	-4.87606	-2.953	1	1.38168e-06	0.00326795	1	0.0403297
Rpgrip1l	1.68344e-17	-0.125356	-0.12999	0.0394611	0.0440245	0.0440245	4.26607e-16	-2.84741	-2.95266	1	0.00455578	0.00327144	1	1
Psg23	-2.81145e-16	-0.0283592	-0.131669	0.039987	0.0446113	0.0446113	-7.0309e-15	-0.635696	-2.95148	1	0.525212	0.00328386	1	1
Ubr2	1.37865e-15	-0.0760814	-0.130969	0.0397759	0.0443757	0.0443757	3.46604e-14	-1.71448	-2.95138	1	0.0869474	0.00328492	1	1
Cacng4	-1.3409e-16	-0.0649321	-0.131148	0.0398335	0.04444	0.04444	-3.36626e-15	-1.46112	-2.95112	1	0.144497	0.00328764	1	1
Nr3c1	5.56024e-17	-0.0875089	-0.13072	0.039712	0.0443045	0.0443045	1.40014e-15	-1.97517	-2.9505	1	0.0486984	0.00329415	1	1
Tmem126b	1.49733e-16	-0.0512727	-0.131299	0.0398975	0.0445114	0.0445114	3.75294e-15	-1.1519	-2.94978	1	0.249813	0.00330172	1	1
Rasl11a	-1.17088e-16	0.211122	0.127278	0.0386767	0.0431495	0.0431495	-3.02734e-15	4.89281	2.9497	1	1.27316e-06	0.0033025	1	0.0371774
Bok	-7.83015e-16	-0.0695023	0.132068	0.0401355	0.0447769	0.0447769	-1.95093e-14	-1.55219	2.94945	1	0.121134	0.00330512	1	1
Akap13	5.03515e-16	0.171078	0.128588	0.0390818	0.0436014	0.0436014	1.28836e-14	3.92368	2.94916	1	9.71098e-05	0.00330822	1	1
Olfm1	-2.22243e-16	-0.100905	0.131933	0.0401016	0.0447392	0.0447392	-5.542e-15	-2.2554	2.94893	1	0.024461	0.00331068	1	1
Gm29066	7.68556e-16	-0.105544	-0.130273	0.0396006	0.0441802	0.0441802	1.94077e-14	-2.38893	-2.94867	1	0.0171998	0.00331341	1	1
Nipal3	3.51141e-17	-0.222263	-0.126811	0.0385525	0.0430109	0.0430109	9.10811e-16	-5.1676	-2.94834	1	3.21558e-07	0.00331693	1	0.00943837
Tmem136	9.35307e-17	-0.162595	0.13126	0.0399182	0.0445345	0.0445345	2.34306e-15	-3.65099	2.94737	1	0.000283607	0.00332714	1	1
Pak3	5.54258e-16	-0.140311	-0.129327	0.0393484	0.0438988	0.0438988	1.40859e-14	-3.19623	-2.94604	1	0.00146418	0.00334135	1	1
Ewsr1	-2.63792e-16	-0.0595842	0.131882	0.0401388	0.0447806	0.0447806	-6.572e-15	-1.33058	2.94507	1	0.183823	0.0033517	1	1
Pak6	-1.8123e-16	0.373309	0.119304	0.0363141	0.0405136	0.0405136	-4.99064e-15	9.21441	2.94479	1	4.97859e-19	0.00335468	1	1.48636e-14
E330023G01Rik	-1.19785e-16	-0.0201859	-0.131434	0.0400159	0.0446435	0.0446435	-2.99343e-15	-0.452159	-2.94409	1	0.651315	0.00336218	1	1
Cftr	6.99843e-16	-0.0271412	-0.13128	0.0399936	0.0446186	0.0446186	1.74989e-14	-0.608293	-2.94228	1	0.543219	0.00338159	1	1
Macrod2os1	5.57138e-16	-0.118383	-0.129698	0.039515	0.0440847	0.0440847	1.40994e-14	-2.68535	-2.94202	1	0.00744227	0.00338433	1	1
Cct6b	4.80437e-16	-0.0042082	0.131544	0.0400811	0.0447162	0.0447162	1.19866e-14	-0.0941091	2.94176	1	0.925053	0.00338721	1	1
Igsf8	1.85536e-16	-0.135415	-0.129254	0.0393886	0.0439436	0.0439436	4.71041e-15	-3.08156	-2.94137	1	0.00215188	0.00339137	1	1
Il16	4.68006e-17	-0.25583	0.129052	0.0393385	0.0438877	0.0438877	1.18969e-15	-5.8292	2.9405	1	9.02158e-09	0.00340081	1	0.00026657
Gm26798	-1.07043e-16	-0.0661358	-0.130664	0.0398305	0.0444367	0.0444367	-2.68746e-15	-1.48832	-2.94046	1	0.137184	0.00340126	1	1
Fcrl6	-1.05503e-16	-0.136057	-0.129182	0.039384	0.0439385	0.0439385	-2.67883e-15	-3.09654	-2.94007	1	0.00204768	0.00340543	1	1
Cubn	-5.33968e-17	-0.120811	0.131376	0.0400608	0.0446936	0.0446936	-1.33289e-15	-2.7031	2.93947	1	0.00706061	0.00341189	1	1
Gm5611	3.14622e-16	-0.16865	0.130804	0.0398926	0.0445059	0.0445059	7.88672e-15	-3.78939	2.93903	1	0.000165975	0.00341674	1	1
Dlx5	-9.36018e-16	-0.126162	-0.129347	0.0394599	0.0440232	0.0440232	-2.37207e-14	-2.86582	-2.93816	1	0.0043025	0.00342616	1	1
Arl9	-8.44416e-17	-0.0317712	0.131424	0.0401267	0.0447671	0.0447671	-2.10437e-15	-0.709699	2.93572	1	0.478161	0.00345284	1	1
Kif5c	-1.51888e-16	-0.0819395	-0.130152	0.0397485	0.0443452	0.0443452	-3.82121e-15	-1.84776	-2.93497	1	0.0651197	0.0034611	1	1
Churc1	-4.68558e-17	0.100784	0.129766	0.0396358	0.0442195	0.0442195	-1.18216e-15	2.27918	2.9346	1	0.0230003	0.00346519	1	1
Gprasp1	7.47619e-17	-0.0590763	-0.13052	0.0398663	0.0444766	0.0444766	1.87532e-15	-1.32826	-2.93458	1	0.18459	0.00346539	1	1
Fam131a	2.064e-16	0.143536	0.128717	0.0393266	0.0438745	0.0438745	5.24836e-15	3.27152	2.93376	1	0.00112996	0.00347438	1	1
Dock4	-2.74621e-16	0.165222	0.12804	0.0391414	0.0436679	0.0436679	-7.01611e-15	3.78361	2.93213	1	0.000169785	0.00349248	1	1
Gnat1	-3.89183e-16	-0.00317024	0.131036	0.0400815	0.0447166	0.0447166	-9.70982e-15	-0.0708963	2.93036	1	0.943503	0.00351211	1	1
Nr1d1	-8.83373e-16	-0.0936969	-0.129719	0.0396813	0.0442702	0.0442702	-2.22617e-14	-2.11648	-2.93016	1	0.0347079	0.00351437	1	1
Snord64	-2.87358e-16	-0.0211856	-0.13071	0.0400168	0.0446445	0.0446445	-7.18093e-15	-0.474539	-2.9278	1	0.635285	0.00354078	1	1
L1-1_CGr	-2.07967e-16	0.069188	-0.13105	0.0401398	0.0447818	0.0447818	-5.18107e-15	1.545	-2.92641	1	0.122863	0.00355637	1	1
Gm10273	7.12339e-17	-0.08124	0.131	0.0401315	0.0447725	0.0447725	1.77501e-15	-1.81451	2.92591	1	0.0700901	0.00356205	1	1
Prkag3	6.7275e-16	0.0312707	-0.130975	0.0401283	0.0447689	0.0447689	1.6765e-14	0.69849	-2.92557	1	0.485136	0.00356587	1	1
Enox2	2.48976e-16	0.0326171	-0.130972	0.0401298	0.0447705	0.0447705	6.20427e-15	0.72854	-2.9254	1	0.466562	0.00356779	1	1
Sec61a2	-7.41722e-17	0.137074	0.128435	0.0393817	0.043936	0.043936	-1.88342e-15	3.11986	2.92324	1	0.0018946	0.00359232	1	1
Pgpep1	1.43034e-15	0.0355816	0.130321	0.0399685	0.0445906	0.0445906	3.57866e-14	0.797961	2.92261	1	0.425203	0.00359944	1	1
Neurl3	-2.8563e-16	-0.0979882	-0.129283	0.0396573	0.0442434	0.0442434	-7.20247e-15	-2.21475	-2.92209	1	0.0271453	0.00360542	1	1
Npy	-6.37083e-16	0.258604	0.124236	0.0381196	0.0425279	0.0425279	-1.67127e-14	6.0808	2.92128	1	2.10802e-09	0.00361468	1	6.24144e-05
Upf3a	6.17237e-16	-0.0791743	0.130777	0.0401343	0.0447756	0.0447756	1.53793e-14	-1.76825	2.92073	1	0.0775186	0.00362097	1	1
Plod1	-2.65334e-16	0.00491729	-0.130562	0.0400878	0.0447237	0.0447237	-6.61882e-15	0.109948	-2.91931	1	0.912487	0.00363729	1	1
Ubxn2a	5.46957e-16	-0.0808945	-0.129424	0.0397594	0.0443574	0.0443574	1.37567e-14	-1.8237	-2.91776	1	0.0686859	0.00365518	1	1
Bsg	2.21473e-16	0.036308	0.130097	0.039967	0.044589	0.044589	5.54138e-15	0.81428	2.9177	1	0.415802	0.00365588	1	1
A930024N18Rik	-3.06059e-16	0.00644341	-0.130492	0.0400914	0.0447277	0.0447277	-7.63403e-15	0.144059	-2.91747	1	0.885502	0.00365848	1	1
Grina	-1.52799e-16	0.0165372	0.130296	0.0400337	0.0446634	0.0446634	-3.81675e-15	0.370264	2.91728	1	0.711314	0.00366065	1	1
Gm29124	-6.28303e-16	0.0348337	0.13008	0.0399728	0.0445954	0.0445954	-1.57183e-14	0.781106	2.91689	1	0.435042	0.00366526	1	1
Arhgap26	-3.40516e-16	-0.127943	-0.128379	0.0394538	0.0440164	0.0440164	-8.63076e-15	-2.90671	-2.91662	1	0.00378491	0.00366833	1	1
BB557941	1.42676e-16	0.131239	-0.130199	0.0400353	0.0446652	0.0446652	3.56376e-15	2.93829	-2.91499	1	0.0034248	0.00368726	1	1
Gm9001	-4.8555e-17	-0.0531882	0.130539	0.0401442	0.0447866	0.0447866	-1.20951e-15	-1.18759	2.91468	1	0.235456	0.00369086	1	1
Sst	-1.49314e-16	-0.110995	0.130265	0.0400876	0.0447235	0.0447235	-3.72468e-15	-2.4818	2.91268	1	0.0133398	0.00371428	1	1
Kif5a	-7.08754e-16	-0.076428	-0.129221	0.0397857	0.0443867	0.0443867	-1.78143e-14	-1.72187	-2.91126	1	0.0856	0.00373103	1	1
Slc2a13	-5.65934e-16	0.0723548	-0.130132	0.0401418	0.044784	0.044784	-1.40984e-14	1.61564	-2.90578	1	0.106688	0.00379607	1	1
Nrxn1	5.74078e-18	-0.361627	-0.118452	0.0365449	0.0407711	0.0407711	1.57089e-16	-8.86969	-2.90529	1	8.03922e-18	0.00380186	1	2.39923e-13
Ddx41	1.07505e-15	-0.0664113	0.129967	0.0401454	0.044788	0.044788	2.67788e-14	-1.48279	2.90183	1	0.138645	0.0038436	1	1
Cpne1	-1.64443e-16	-0.0352986	-0.129344	0.0399754	0.0445983	0.0445983	-4.11362e-15	-0.791479	-2.90021	1	0.428972	0.00386322	1	1
Rtl1	1.64632e-15	-0.00513343	-0.129642	0.0400691	0.0447028	0.0447028	4.10871e-14	-0.114835	-2.90008	1	0.908614	0.00386483	1	1
Gm9828	5.31389e-16	-0.159895	0.129186	0.0399347	0.0445529	0.0445529	1.33064e-14	-3.58888	2.8996	1	0.000358723	0.00387058	1	1
Tigit	-4.69772e-17	-0.167604	-0.126579	0.0391315	0.0436569	0.0436569	-1.2005e-15	-3.83913	-2.89941	1	0.000136339	0.0038729	1	1
Xkr4	-1.80038e-16	-0.108258	-0.128044	0.0395985	0.0441778	0.0441778	-4.54659e-15	-2.4505	-2.89837	1	0.014545	0.00388561	1	1
Dot1l	2.30665e-16	0.372891	0.117518	0.0363448	0.0405479	0.0405479	6.34658e-15	9.19631	2.89826	1	5.77261e-19	0.00388698	1	1.72335e-14
6820431F20Rik	1.83378e-16	-0.190117	-0.125833	0.0389168	0.0434173	0.0434173	4.71204e-15	-4.37882	-2.89822	1	1.4038e-05	0.00388748	1	0.405192
Ddx6	9.52286e-17	-0.0182574	-0.129428	0.0400333	0.0446629	0.0446629	2.37873e-15	-0.408783	-2.89788	1	0.682843	0.00389164	1	1
Hapln1	-1.95889e-16	-0.0430037	-0.129126	0.0399463	0.0445659	0.0445659	-4.90381e-15	-0.964947	-2.89743	1	0.334953	0.00389718	1	1
Tox2	-1.42172e-16	-0.00220838	-0.129546	0.0400768	0.0447115	0.0447115	-3.54748e-15	-0.0493917	-2.89738	1	0.960623	0.00389772	1	1
Cycs	1.5856e-17	0.0459347	0.129074	0.0399345	0.0445527	0.0445527	3.97049e-16	1.03102	2.8971	1	0.302939	0.00390115	1	1
Chil1	3.19535e-17	-0.0104512	0.129607	0.0401039	0.0447417	0.0447417	7.96768e-16	-0.233589	2.89678	1	0.815382	0.00390505	1	1
Tmx3	-5.68909e-17	-0.0837823	-0.128456	0.0397495	0.0443463	0.0443463	-1.43124e-15	-1.88928	-2.89666	1	0.0593282	0.00390656	1	1
Gm4076	1.44606e-16	-0.0185407	-0.129366	0.0400328	0.0446624	0.0446624	3.61219e-15	-0.41513	-2.89654	1	0.678192	0.0039081	1	1
Gm12668	3.8837e-17	-0.0734925	-0.128585	0.0398059	0.0444092	0.0444092	9.7566e-16	-1.65489	-2.89547	1	0.0984594	0.0039212	1	1
Kynu	-3.71362e-17	-0.0418167	-0.129042	0.0399517	0.0445719	0.0445719	-9.29527e-16	-0.938185	-2.89515	1	0.34852	0.00392521	1	1
Ppm1h	1.47251e-16	0.161335	0.126533	0.0391896	0.0437216	0.0437216	3.75739e-15	3.69006	2.89407	1	0.000244218	0.00393855	1	1
Hpca	-6.75297e-18	0.119177	0.127596	0.039525	0.0440958	0.0440958	-1.70853e-16	2.70267	2.8936	1	0.00706961	0.00394425	1	1
Gm12853	3.67236e-16	-0.075344	0.129571	0.0401421	0.0447843	0.0447843	9.14841e-15	-1.68238	2.89323	1	0.0930068	0.00394884	1	1
Gng3	1.26817e-16	-0.243488	-0.123557	0.038324	0.042756	0.042756	3.30907e-15	-5.69483	-2.88981	1	1.91992e-08	0.00399147	1	0.000566741
Gm5844	-3.03871e-16	0.0895775	-0.129369	0.0401282	0.0447688	0.0447688	-7.5725e-15	2.00089	-2.88971	1	0.045846	0.00399275	1	1
Tmeff2	-2.33213e-16	0.111689	0.127592	0.0395782	0.0441552	0.0441552	-5.89246e-15	2.52947	2.88962	1	0.0116738	0.0039939	1	1
Prkce	-4.31661e-16	0.2123	0.124682	0.0386875	0.0431615	0.0431615	-1.11576e-14	4.91874	2.88874	1	1.12119e-06	0.00400497	1	0.0327545
Gm9157	3.46169e-16	0.0615878	-0.129375	0.0401492	0.0447922	0.0447922	8.62207e-15	1.37497	-2.88834	1	0.169646	0.00401001	1	1
Ptgr1	-8.69004e-17	-0.184575	-0.125553	0.0389757	0.043483	0.043483	-2.2296e-15	-4.24475	-2.88741	1	2.52862e-05	0.00402172	1	0.726422
Gm20707	2.80081e-16	-0.0867825	-0.127973	0.0397353	0.0443304	0.0443304	7.04867e-15	-1.95763	-2.88679	1	0.0507286	0.00402948	1	1
Samd12	-1.07881e-16	-0.0934052	-0.12784	0.0396962	0.0442869	0.0442869	-2.71765e-15	-2.10909	-2.88664	1	0.0353427	0.0040314	1	1
Kcnk1	-4.85149e-16	0.355104	0.118039	0.0366695	0.0409102	0.0409102	-1.32303e-14	8.68009	2.88533	1	3.5891e-17	0.004048	1	1.07081e-12
Mapk11	3.29005e-16	-0.190882	0.128049	0.0397865	0.0443875	0.0443875	8.26926e-15	-4.30036	2.8848	1	1.98473e-05	0.00405475	1	0.571305
Trim65	-1.90047e-17	-0.186913	-0.125346	0.0389539	0.0434587	0.0434587	-4.87878e-16	-4.30093	-2.88426	1	1.97976e-05	0.00406158	1	0.569893
Trmt6	1.75682e-16	-0.0285734	0.129104	0.0401342	0.0447755	0.0447755	4.37737e-15	-0.638149	2.88336	1	0.523616	0.00407308	1	1
Dscc1	2.29616e-16	-0.0338344	-0.128605	0.0399852	0.0446093	0.0446093	5.74252e-15	-0.758462	-2.88292	1	0.448467	0.0040786	1	1
AW551984	2.12856e-16	-0.0380041	-0.128511	0.03997	0.0445922	0.0445922	5.32539e-15	-0.852257	-2.88192	1	0.394405	0.00409142	1	1
L1MdA_VII	-2.08246e-16	0.0534691	-0.129087	0.0401505	0.0447937	0.0447937	-5.18662e-15	1.19368	-2.88182	1	0.233068	0.00409277	1	1
Cacnb2	4.50874e-16	-0.15281	-0.126247	0.0392675	0.0438086	0.0438086	1.14821e-14	-3.48814	-2.88179	1	0.000521353	0.00409314	1	1
Gpr176	-4.04189e-16	-0.0587209	-0.128165	0.039883	0.0444952	0.0444952	-1.01344e-14	-1.31971	-2.88042	1	0.187425	0.00411076	1	1
Copz1	4.87568e-17	-0.082746	0.128953	0.0401378	0.0447795	0.0447795	1.21473e-15	-1.84785	2.87973	1	0.0651066	0.00411959	1	1
Vps8	3.15983e-16	-0.230713	-0.123574	0.0384824	0.0429327	0.0429327	8.21109e-15	-5.37383	-2.87832	1	1.09778e-07	0.00413774	1	0.00322945
D1Ertd622e	-8.39595e-17	-0.0419809	-0.128297	0.0399555	0.0445761	0.0445761	-2.10133e-15	-0.941779	-2.87815	1	0.346678	0.00414002	1	1
Gm12413	1.37023e-16	-0.108757	0.128733	0.0400975	0.0447345	0.0447345	3.41724e-15	-2.43116	2.8777	1	0.0153369	0.0041458	1	1
Htra1	3.02618e-15	-0.0362776	-0.128321	0.0399777	0.0446009	0.0446009	7.56967e-14	-0.813382	-2.8771	1	0.416316	0.00415365	1	1
Cxcl11	-5.33277e-16	-0.0128531	-0.128412	0.0400549	0.0446871	0.0446871	-1.33136e-14	-0.287625	-2.87358	1	0.773731	0.00419953	1	1
Dchs1	7.37611e-18	-0.0317682	-0.128143	0.0399955	0.0446207	0.0446207	1.84424e-16	-0.711962	-2.87183	1	0.47676	0.00422249	1	1
Aldh5a1	1.23034e-16	-0.0530516	-0.127852	0.0399111	0.0445265	0.0445265	3.08271e-15	-1.19146	-2.87137	1	0.233936	0.00422861	1	1
Gm22449	-4.48483e-16	-0.0601422	-0.12765	0.0398795	0.0444913	0.0444913	-1.1246e-14	-1.35177	-2.8691	1	0.176948	0.00425864	1	1
Gm22511	-4.48483e-16	-0.0601422	-0.12765	0.0398795	0.0444913	0.0444913	-1.1246e-14	-1.35177	-2.8691	1	0.176948	0.00425864	1	1
Gm22524	-4.48483e-16	-0.0601422	-0.12765	0.0398795	0.0444913	0.0444913	-1.1246e-14	-1.35177	-2.8691	1	0.176948	0.00425864	1	1
Gm22627	-4.48483e-16	-0.0601422	-0.12765	0.0398795	0.0444913	0.0444913	-1.1246e-14	-1.35177	-2.8691	1	0.176948	0.00425864	1	1
Gm22630	-4.48483e-16	-0.0601422	-0.12765	0.0398795	0.0444913	0.0444913	-1.1246e-14	-1.35177	-2.8691	1	0.176948	0.00425864	1	1
Gm22909	-4.48483e-16	-0.0601422	-0.12765	0.0398795	0.0444913	0.0444913	-1.1246e-14	-1.35177	-2.8691	1	0.176948	0.00425864	1	1
Gm22912	-4.48483e-16	-0.0601422	-0.12765	0.0398795	0.0444913	0.0444913	-1.1246e-14	-1.35177	-2.8691	1	0.176948	0.00425864	1	1
Gm23356	-4.48483e-16	-0.0601422	-0.12765	0.0398795	0.0444913	0.0444913	-1.1246e-14	-1.35177	-2.8691	1	0.176948	0.00425864	1	1
Gm23560	-4.48483e-16	-0.0601422	-0.12765	0.0398795	0.0444913	0.0444913	-1.1246e-14	-1.35177	-2.8691	1	0.176948	0.00425864	1	1
Gm23575	-4.48483e-16	-0.0601422	-0.12765	0.0398795	0.0444913	0.0444913	-1.1246e-14	-1.35177	-2.8691	1	0.176948	0.00425864	1	1
Gm24027	-4.48483e-16	-0.0601422	-0.12765	0.0398795	0.0444913	0.0444913	-1.1246e-14	-1.35177	-2.8691	1	0.176948	0.00425864	1	1
Gm24206	-4.48483e-16	-0.0601422	-0.12765	0.0398795	0.0444913	0.0444913	-1.1246e-14	-1.35177	-2.8691	1	0.176948	0.00425864	1	1
Gm24219	-4.48483e-16	-0.0601422	-0.12765	0.0398795	0.0444913	0.0444913	-1.1246e-14	-1.35177	-2.8691	1	0.176948	0.00425864	1	1
Gm24528	-4.48483e-16	-0.0601422	-0.12765	0.0398795	0.0444913	0.0444913	-1.1246e-14	-1.35177	-2.8691	1	0.176948	0.00425864	1	1
Gm24585	-4.48483e-16	-0.0601422	-0.12765	0.0398795	0.0444913	0.0444913	-1.1246e-14	-1.35177	-2.8691	1	0.176948	0.00425864	1	1
Gm24702	-4.48483e-16	-0.0601422	-0.12765	0.0398795	0.0444913	0.0444913	-1.1246e-14	-1.35177	-2.8691	1	0.176948	0.00425864	1	1
Gm24759	-4.48483e-16	-0.0601422	-0.12765	0.0398795	0.0444913	0.0444913	-1.1246e-14	-1.35177	-2.8691	1	0.176948	0.00425864	1	1
Gm24866	-4.48483e-16	-0.0601422	-0.12765	0.0398795	0.0444913	0.0444913	-1.1246e-14	-1.35177	-2.8691	1	0.176948	0.00425864	1	1
Gm24872	-4.48483e-16	-0.0601422	-0.12765	0.0398795	0.0444913	0.0444913	-1.1246e-14	-1.35177	-2.8691	1	0.176948	0.00425864	1	1
Gm25098	-4.48483e-16	-0.0601422	-0.12765	0.0398795	0.0444913	0.0444913	-1.1246e-14	-1.35177	-2.8691	1	0.176948	0.00425864	1	1
Gm25146	-4.48483e-16	-0.0601422	-0.12765	0.0398795	0.0444913	0.0444913	-1.1246e-14	-1.35177	-2.8691	1	0.176948	0.00425864	1	1
Gm25209	-4.48483e-16	-0.0601422	-0.12765	0.0398795	0.0444913	0.0444913	-1.1246e-14	-1.35177	-2.8691	1	0.176948	0.00425864	1	1
Gm25230	-4.48483e-16	-0.0601422	-0.12765	0.0398795	0.0444913	0.0444913	-1.1246e-14	-1.35177	-2.8691	1	0.176948	0.00425864	1	1
Gm25462	-4.48483e-16	-0.0601422	-0.12765	0.0398795	0.0444913	0.0444913	-1.1246e-14	-1.35177	-2.8691	1	0.176948	0.00425864	1	1
Gm25463	-4.48483e-16	-0.0601422	-0.12765	0.0398795	0.0444913	0.0444913	-1.1246e-14	-1.35177	-2.8691	1	0.176948	0.00425864	1	1
Gm25523	-4.48483e-16	-0.0601422	-0.12765	0.0398795	0.0444913	0.0444913	-1.1246e-14	-1.35177	-2.8691	1	0.176948	0.00425864	1	1
Gm25710	-4.48483e-16	-0.0601422	-0.12765	0.0398795	0.0444913	0.0444913	-1.1246e-14	-1.35177	-2.8691	1	0.176948	0.00425864	1	1
Gm25741	-4.48483e-16	-0.0601422	-0.12765	0.0398795	0.0444913	0.0444913	-1.1246e-14	-1.35177	-2.8691	1	0.176948	0.00425864	1	1
Gm25742	-4.48483e-16	-0.0601422	-0.12765	0.0398795	0.0444913	0.0444913	-1.1246e-14	-1.35177	-2.8691	1	0.176948	0.00425864	1	1
Gm26059	-4.48483e-16	-0.0601422	-0.12765	0.0398795	0.0444913	0.0444913	-1.1246e-14	-1.35177	-2.8691	1	0.176948	0.00425864	1	1
Gm26334	-4.48483e-16	-0.0601422	-0.12765	0.0398795	0.0444913	0.0444913	-1.1246e-14	-1.35177	-2.8691	1	0.176948	0.00425864	1	1
Gm26392	-4.48483e-16	-0.0601422	-0.12765	0.0398795	0.0444913	0.0444913	-1.1246e-14	-1.35177	-2.8691	1	0.176948	0.00425864	1	1
Gm26434	-4.48483e-16	-0.0601422	-0.12765	0.0398795	0.0444913	0.0444913	-1.1246e-14	-1.35177	-2.8691	1	0.176948	0.00425864	1	1
Rfxank	3.67451e-16	-0.0852967	0.128455	0.0401369	0.0447785	0.0447785	9.15495e-15	-1.90486	2.86867	1	0.0572676	0.00426437	1	1
Ocstamp	-1.96523e-16	-0.0152445	-0.128148	0.0400495	0.044681	0.044681	-4.90701e-15	-0.341184	-2.86807	1	0.733082	0.00427243	1	1
Pcyt1b	3.96427e-16	-0.0930444	0.128351	0.040127	0.0447675	0.0447675	9.8793e-15	-2.07839	2.86706	1	0.0380899	0.00428587	1	1
Ift80	-3.23472e-16	-0.126986	-0.126259	0.0394772	0.0440425	0.0440425	-8.19391e-15	-2.88326	-2.86677	1	0.00407433	0.00428977	1	1
Cideb	-1.06938e-16	-0.0812962	0.128275	0.0401419	0.044784	0.044784	-2.66399e-15	-1.81529	2.8643	1	0.0699688	0.0043229	1	1
Zfp951	5.87324e-17	-0.211683	-0.123664	0.0387038	0.0431797	0.0431797	1.51748e-15	-4.90237	-2.86395	1	1.21493e-06	0.00432761	1	0.035487
Gm26205	2.63902e-16	-0.0344736	0.128249	0.0401443	0.0447867	0.0447867	6.57383e-15	-0.769727	2.86355	1	0.441759	0.00433298	1	1
Slc30a9	7.47882e-17	-0.141103	-0.125761	0.03937	0.0439229	0.0439229	1.89963e-15	-3.21252	-2.86323	1	0.00138493	0.00433733	1	1
Aifm3	-1.27473e-16	-0.227125	0.126317	0.0395609	0.0441359	0.0441359	-3.22219e-15	-5.14605	2.862	1	3.5903e-07	0.0043539	1	0.0105339
Arfgap1	1.82798e-16	-0.000233185	0.128007	0.0400907	0.044727	0.044727	4.55961e-15	-0.00521352	2.86197	1	0.995842	0.00435432	1	1
9530026P05Rik	1.21168e-16	-0.135611	0.127757	0.0400287	0.0446578	0.0446578	3.02702e-15	-3.03667	2.8608	1	0.002494	0.00437025	1	1
Wnt7a	1.65905e-16	-0.0495731	-0.127279	0.0399299	0.0445476	0.0445476	4.15489e-15	-1.11281	-2.85715	1	0.266227	0.00442009	1	1
Zcchc18	3.45815e-16	-0.319263	-0.11873	0.0372783	0.0415893	0.0415893	9.27658e-15	-7.67655	-2.85482	1	6.50483e-14	0.00445228	1	1.93785e-09
Pitpnm2	-2.18349e-16	0.113333	0.126039	0.0395781	0.044155	0.044155	-5.51692e-15	2.56671	2.85447	1	0.0105039	0.00445705	1	1
Kcnip2	3.9259e-16	-0.145447	0.127354	0.0399959	0.0446212	0.0446212	9.81575e-15	-3.25959	2.85411	1	0.00117771	0.00446211	1	1
Rgs4	9.40672e-17	0.29284	0.119964	0.0376779	0.0420352	0.0420352	2.49661e-15	6.96655	2.85389	1	8.42777e-12	0.00446517	1	2.50591e-07
Ces2b	3.00814e-16	-0.143893	-0.125263	0.0393509	0.0439016	0.0439016	7.64439e-15	-3.27762	-2.85327	1	0.00110623	0.00447366	1	1
Gm28925	5.23424e-16	0.00679718	-0.127596	0.040107	0.0447451	0.0447451	1.30507e-14	0.151909	-2.85161	1	0.879309	0.00449677	1	1
Dnm3os	4.0284e-16	-0.115981	-0.125757	0.0395615	0.0441366	0.0441366	1.01826e-14	-2.62777	-2.84927	1	0.00881046	0.00452957	1	1
Gm27527	2.23956e-16	-0.176577	0.126668	0.0398639	0.0444739	0.0444739	5.618e-15	-3.97034	2.84813	1	8.03105e-05	0.00454562	1	1
C573	-4.8449e-16	0.0511754	-0.127574	0.0401566	0.0448005	0.0448005	-1.2065e-14	1.1423	-2.8476	1	0.253779	0.00455308	1	1
MTC_I	-5.27597e-16	0.0962907	-0.127461	0.0401251	0.0447653	0.0447653	-1.31488e-14	2.15101	-2.84731	1	0.0318668	0.00455727	1	1
Gm23317	-5.22214e-16	-0.092315	-0.126113	0.0397149	0.0443077	0.0443077	-1.31491e-14	-2.0835	-2.84629	1	0.0376208	0.00457161	1	1
Fcgrt	-1.64008e-16	-0.0616811	0.127502	0.0401568	0.0448008	0.0448008	-4.08418e-15	-1.37679	2.84598	1	0.169082	0.00457602	1	1
Zfp788	2.55181e-16	-0.0843359	-0.126241	0.0397613	0.0443594	0.0443594	6.41783e-15	-1.9012	-2.84586	1	0.0577467	0.00457773	1	1
Ptgs2os	-2.84093e-17	0.138837	0.125064	0.0393938	0.0439494	0.0439494	-7.21162e-16	3.15902	2.84564	1	0.00166117	0.00458086	1	1
Cd99l2	-1.69885e-16	-0.110594	-0.125712	0.0395994	0.0441788	0.0441788	-4.29009e-15	-2.50333	-2.84553	1	0.0125629	0.00458246	1	1
Gm22392	-1.47326e-16	-0.0305737	0.127421	0.0401443	0.0447867	0.0447867	-3.66992e-15	-0.682651	2.84506	1	0.495086	0.00458908	1	1
Sema6d	-4.53697e-16	-0.0403811	-0.126864	0.0399704	0.0445928	0.0445928	-1.13508e-14	-0.905552	-2.84495	1	0.36553	0.00459071	1	1
Lgi1	1.50395e-17	0.111489	0.125613	0.0395939	0.0441727	0.0441727	3.79843e-16	2.52394	2.84368	1	0.0118572	0.00460872	1	1
Gm13247	2.95447e-16	0.0542381	-0.127375	0.0401579	0.0448019	0.0448019	7.35713e-15	1.21062	-2.84307	1	0.226509	0.00461751	1	1
Fam49a	-3.43485e-18	0.0658672	-0.127334	0.0401563	0.0448001	0.0448001	-8.55372e-17	1.47025	-2.84228	1	0.14201	0.00462875	1	1
Ptk2b	-8.5825e-17	0.079377	0.126165	0.0397898	0.0443913	0.0443913	-2.15696e-15	1.78812	2.84211	1	0.0742518	0.00463118	1	1
Pign	-5.11889e-16	-0.125225	-0.125227	0.0394981	0.0440659	0.0440659	-1.29598e-14	-2.84178	-2.84181	1	0.00463594	0.0046355	1	1
Flt3	1.6568e-16	-0.0530157	0.127249	0.0401583	0.0448023	0.0448023	4.12569e-15	-1.18332	2.84023	1	0.237141	0.00465823	1	1
Zfp639	8.66241e-17	-0.0254369	-0.126756	0.0400254	0.0446541	0.0446541	2.16423e-15	-0.569643	-2.83861	1	0.569129	0.00468158	1	1
Tcf7l2	5.22689e-16	0.0262996	-0.127115	0.0401409	0.0447829	0.0447829	1.30214e-14	0.587268	-2.83846	1	0.557241	0.00468379	1	1
Chd6	-2.29947e-17	-0.282255	-0.119807	0.0378356	0.0422111	0.0422111	-6.07753e-16	-6.68676	-2.83828	1	5.15528e-11	0.00468643	1	1.53127e-06
Mcmdc2	1.73547e-16	-0.112676	-0.12527	0.0395882	0.0441664	0.0441664	4.38381e-15	-2.55117	-2.83631	1	0.0109787	0.004715	1	1
4930451G09Rik	2.38834e-16	-0.0667675	0.127029	0.0401571	0.044801	0.044801	5.9475e-15	-1.49031	2.83541	1	0.136658	0.00472819	1	1
4930556G22Rik	-3.12866e-17	0.022618	-0.126946	0.0401369	0.0447785	0.0447785	-7.79496e-16	0.505107	-2.83498	1	0.613666	0.00473447	1	1
Ankrd33b	-4.77954e-16	0.496946	0.106401	0.0336989	0.037596	0.037596	-1.41831e-14	13.218	2.83011	1	2.91489e-35	0.00480621	1	8.71639e-31
Camk2b	1.49204e-16	0.0426628	0.126122	0.0399657	0.0445875	0.0445875	3.7333e-15	0.956833	2.82865	1	0.33903	0.00482788	1	1
Myo1g	1.45021e-17	-0.206508	0.125278	0.0396992	0.0442902	0.0442902	3.65299e-16	-4.66261	2.82857	1	3.83676e-06	0.00482908	1	0.111493
Spice1	-5.50728e-18	0.0167024	-0.12661	0.0401298	0.0447706	0.0447706	-1.37237e-16	0.373067	-2.82797	1	0.709228	0.00483798	1	1
Fermt3	2.22993e-16	-0.0726304	0.126686	0.0401552	0.0447989	0.0447989	5.55329e-15	-1.62125	2.82789	1	0.105479	0.00483918	1	1
Csrnp3	-4.37248e-16	-0.179343	-0.123192	0.0390479	0.0435635	0.0435635	-1.11977e-14	-4.11682	-2.82787	1	4.36944e-05	0.00483946	1	1
Rgs7	5.46428e-16	0.189434	0.122877	0.0389496	0.0434539	0.0434539	1.40291e-14	4.35943	2.82774	1	1.52999e-05	0.00484135	1	0.441342
Gm12015	7.48282e-16	-0.090977	0.126588	0.0401362	0.0447778	0.0447778	1.86435e-14	-2.03174	2.82702	1	0.0426117	0.00485209	1	1
Pola2	7.23306e-16	-0.0446478	0.126619	0.0401585	0.0448026	0.0448026	1.80113e-14	-0.996545	2.82616	1	0.31938	0.00486503	1	1
Gm6994	4.98708e-17	-0.0889279	0.126529	0.0401393	0.0447812	0.0447812	1.24244e-15	-1.98583	2.8255	1	0.0474985	0.00487491	1	1
CAVID2C	-1.50206e-15	0.0867054	-0.126505	0.0401423	0.0447845	0.0447845	-3.74184e-14	1.93606	-2.82476	1	0.0533214	0.00488613	1	1
Gm12925	-1.33224e-16	-0.0400357	-0.125969	0.0399771	0.0446002	0.0446002	-3.33251e-15	-0.897658	-2.8244	1	0.369722	0.00489151	1	1
Gm26628	6.11649e-16	-0.120013	0.126279	0.0400785	0.0447134	0.0447134	1.52612e-14	-2.68405	2.82419	1	0.00747087	0.00489457	1	1
Grin2a	-1.39454e-16	0.182588	0.122892	0.0390185	0.0435307	0.0435307	-3.57404e-15	4.19447	2.82312	1	3.14046e-05	0.00491083	1	0.900527
Gm16399	-4.1939e-17	0.0825384	-0.126425	0.0401474	0.0447902	0.0447902	-1.04462e-15	1.84278	-2.82259	1	0.065846	0.00491877	1	1
Brinp1	-2.80457e-16	0.43385	0.11075	0.0351711	0.0392385	0.0392385	-7.97407e-15	11.0568	2.82247	1	4.9548e-26	0.00492056	1	1.48094e-21
Pvrl2	1.96323e-16	-0.00822284	-0.12612	0.0400799	0.0447149	0.0447149	4.89829e-15	-0.183895	-2.82053	1	0.854157	0.00495009	1	1
Cdr1	-7.45685e-16	-0.133577	-0.1241	0.0394428	0.0440042	0.0440042	-1.89055e-14	-3.03556	-2.82019	1	0.00250304	0.0049552	1	1
Osbp	-7.74563e-18	0.0579178	-0.126335	0.0401622	0.0448067	0.0448067	-1.92859e-16	1.29262	-2.81956	1	0.196633	0.00496494	1	1
Gm23330	1.69834e-16	-0.0731332	0.126303	0.0401563	0.0448001	0.0448001	4.22932e-15	-1.63243	2.81925	1	0.103104	0.00496964	1	1
Mga	7.83765e-18	-0.104186	-0.124643	0.03965	0.0442353	0.0442353	1.97671e-16	-2.35527	-2.81772	1	0.0188246	0.00499306	1	1
Draxin	-2.18974e-16	0.328831	0.116716	0.0371434	0.0414388	0.0414388	-5.89538e-15	7.93535	2.81659	1	1.00649e-14	0.00501046	1	2.99994e-10
L1P_MA2	-4.9452e-17	0.0918608	-0.126107	0.0401366	0.0447782	0.0447782	-1.23209e-15	2.05146	-2.81625	1	0.0406479	0.00501561	1	1
Gm16199	-9.3987e-16	0.20852	0.12171	0.0387569	0.0432389	0.0432389	-2.42504e-14	4.82252	2.81483	1	1.7917e-06	0.00503762	1	0.0522354
Sobp	1.15819e-15	-0.116099	-0.124266	0.0395715	0.0441477	0.0441477	2.92683e-14	-2.62977	-2.81477	1	0.00875936	0.00503852	1	1
Emilin1	-1.82733e-16	0.0754341	-0.126087	0.0401554	0.0447991	0.0447991	-4.55064e-15	1.68383	-2.81449	1	0.0927252	0.00504276	1	1
Rbbp7	6.22049e-16	0.411338	0.111822	0.0356465	0.0397688	0.0397688	1.74505e-14	10.3432	2.81181	1	3.24291e-23	0.00508456	1	9.68982e-19
Pde6d	2.09655e-16	-0.164735	0.125181	0.0399228	0.0445396	0.0445396	5.25152e-15	-3.69863	2.81056	1	0.000236297	0.005104	1	1
Gm15852	9.27359e-16	-0.13235	0.125537	0.0400452	0.0446762	0.0446762	2.31578e-14	-2.96242	2.80993	1	0.00317094	0.00511383	1	1
Cox16	1.39937e-15	-0.177325	-0.122488	0.0390735	0.0435921	0.0435921	3.58138e-14	-4.06783	-2.80987	1	5.36718e-05	0.00511477	1	1
Gm13881	-4.6082e-16	0.0357162	-0.125878	0.0401561	0.0447999	0.0447999	-1.14757e-14	0.797238	-2.80979	1	0.425622	0.00511612	1	1
Gm26782	-4.43472e-17	-0.145717	-0.123331	0.0393509	0.0439016	0.0439016	-1.12697e-15	-3.31917	-2.80926	1	0.000956566	0.00512441	1	1
Thap1	-1.87865e-16	0.00960379	0.125591	0.040079	0.044714	0.044714	-4.68736e-15	0.214783	2.80878	1	0.830008	0.00513202	1	1
Mro	-1.94423e-16	-0.101558	-0.124304	0.0396694	0.044257	0.044257	-4.90107e-15	-2.29472	-2.8087	1	0.0220871	0.00513329	1	1
Chn1	3.49797e-16	-0.00676392	0.125633	0.0401168	0.0447561	0.0447561	8.71947e-15	-0.151128	2.80706	1	0.879924	0.00515912	1	1
Atp8a2	-3.93853e-17	-0.191335	-0.121921	0.0389384	0.0434414	0.0434414	-1.01148e-15	-4.40443	-2.80655	1	1.25232e-05	0.00516709	1	0.361758
Abcc1	1.72712e-16	-0.184726	-0.122089	0.039004	0.0435146	0.0435146	4.42806e-15	-4.24514	-2.8057	1	2.52441e-05	0.0051806	1	0.725237
Ak5	-5.23577e-16	-0.205844	0.124275	0.0397047	0.0442963	0.0442963	-1.31868e-14	-4.64698	2.80555	1	4.1284e-06	0.00518305	1	0.119922
Nsmf	7.64615e-17	0.0359722	0.125184	0.0399972	0.0446226	0.0446226	1.91167e-15	0.806143	2.80538	1	0.420474	0.00518564	1	1
Gm25035	-2.41587e-16	-0.0889027	0.125609	0.0401426	0.0447848	0.0447848	-6.01822e-15	-1.98511	2.80473	1	0.0475792	0.00519605	1	1
Bcl2l15	-1.40095e-16	-0.0549524	-0.124904	0.0399206	0.0445372	0.0445372	-3.50934e-15	-1.23385	-2.80449	1	0.217732	0.00519994	1	1
Gm20465	1.87447e-16	-0.0727486	-0.124557	0.0398361	0.0444429	0.0444429	4.70545e-15	-1.6369	-2.80263	1	0.102166	0.0052296	1	1
Xpo7	1.8078e-16	-0.1934	-0.121683	0.0389192	0.0434199	0.0434199	4.64501e-15	-4.45417	-2.80248	1	1.00159e-05	0.00523197	1	0.28971
Gm24362	-1.51178e-16	-0.0591173	0.125518	0.0401654	0.0448103	0.0448103	-3.76389e-15	-1.31928	2.80111	1	0.187569	0.00525395	1	1
Rbm4b	-5.2473e-17	-0.0596633	0.125455	0.0401655	0.0448105	0.0448105	-1.30642e-15	-1.33146	2.79968	1	0.183535	0.00527688	1	1
4933417D19Rik	6.09926e-16	-0.00799754	0.125309	0.0401208	0.0447606	0.0447606	1.52022e-14	-0.178674	2.79954	1	0.858253	0.00527926	1	1
Icmt	2.17368e-16	0.0629256	-0.125419	0.0401649	0.0448097	0.0448097	5.4119e-15	1.40428	-2.79891	1	0.160743	0.00528933	1	1
Gm20482	-3.26303e-16	0.0439974	-0.12535	0.0401637	0.0448084	0.0448084	-8.12432e-15	0.9819	-2.79747	1	0.326538	0.00531271	1	1
Etohd2	-6.51924e-16	0.120874	-0.125083	0.0400798	0.0447148	0.0447148	-1.62656e-14	2.70321	-2.79734	1	0.00705835	0.00531483	1	1
Panx1	-5.60303e-16	-0.00128301	-0.125135	0.0401021	0.0447396	0.0447396	-1.39719e-14	-0.0286773	-2.79696	1	0.977131	0.00532105	1	1
Slc25a43	-7.74908e-16	-0.0272737	-0.124813	0.0400301	0.0446594	0.0446594	-1.93581e-14	-0.610706	-2.79478	1	0.541621	0.00535663	1	1
Arhgef5	3.37896e-16	-0.0979393	-0.123761	0.0396962	0.0442869	0.0442869	8.51205e-15	-2.21147	-2.79452	1	0.0273724	0.00536074	1	1
Zbtb6	2.1751e-16	-0.100048	-0.123716	0.0396832	0.0442723	0.0442723	5.48116e-15	-2.25983	-2.79443	1	0.0241834	0.00536229	1	1
Stambpl1	5.78814e-16	-0.150511	-0.122564	0.0393166	0.0438633	0.0438633	1.47219e-14	-3.43137	-2.79422	1	0.000641073	0.00536571	1	1
Xrn1	3.45212e-17	-0.150818	-0.12255	0.0393141	0.0438605	0.0438605	8.78088e-16	-3.43859	-2.79408	1	0.000624535	0.00536798	1	1
Inip	1.32725e-16	-0.147809	0.124652	0.0399939	0.044619	0.044619	3.31864e-15	-3.3127	2.7937	1	0.00097856	0.00537424	1	1
Itpr2	-1.34241e-16	0.0340599	-0.125163	0.0401579	0.044802	0.044802	-3.34284e-15	0.760233	-2.79369	1	0.447409	0.00537443	1	1
Gm11345	-2.55306e-16	-0.0266807	-0.124702	0.0400327	0.0446623	0.0446623	-6.37744e-15	-0.597389	-2.79211	1	0.550469	0.00540036	1	1
Psmc4	-7.95221e-17	-0.0594243	0.125031	0.0401673	0.0448124	0.0448124	-1.97977e-15	-1.32607	2.79009	1	0.185313	0.00543377	1	1
Gm16212	1.52517e-17	0.0159944	-0.124912	0.0401369	0.0447785	0.0447785	3.79993e-16	0.35719	-2.78955	1	0.721073	0.00544277	1	1
Gm6463	1.10365e-16	0.0655366	-0.124905	0.040166	0.0448109	0.0448109	2.74772e-15	1.46251	-2.78739	1	0.144115	0.00547871	1	1
Mslnl	-4.16345e-16	0.128285	-0.1245	0.0400605	0.0446932	0.0446932	-1.03929e-14	2.87034	-2.78566	1	0.00424224	0.00550757	1	1
Galnt2	-2.73444e-17	0.00831831	-0.124445	0.0401257	0.044766	0.044766	-6.81469e-16	0.185818	-2.77989	1	0.852649	0.0056051	1	1
Invs	2.68543e-16	-0.0815765	-0.123398	0.0397958	0.0443979	0.0443979	6.74803e-15	-1.83739	-2.77937	1	0.0666372	0.00561408	1	1
B2	8.75673e-17	-0.114012	0.124328	0.0400995	0.0447367	0.0447367	2.18375e-15	-2.54851	2.7791	1	0.011062	0.0056186	1	1
Efcc1	-2.60492e-16	-0.0534492	0.124538	0.0401696	0.044815	0.044815	-6.4848e-15	-1.19266	2.77893	1	0.233464	0.0056215	1	1
Gm23766	-2.27036e-16	0.0176613	-0.124428	0.0401418	0.0447839	0.0447839	-5.65585e-15	0.394367	-2.7784	1	0.693448	0.00563054	1	1
Gm11497	-2.11744e-16	0.0624812	0.123626	0.0398935	0.0445069	0.0445069	-5.30775e-15	1.40385	2.77769	1	0.16087	0.0056428	1	1
Slc39a11	1.88511e-16	0.0136777	-0.124375	0.0401356	0.0447771	0.0447771	4.69686e-15	0.305463	-2.77766	1	0.760118	0.00564334	1	1
Triobp	2.0581e-16	-0.0895464	-0.123164	0.0397515	0.0443485	0.0443485	5.17742e-15	-2.01915	-2.77718	1	0.0439077	0.00565154	1	1
Sdccag8	5.55559e-17	-0.177338	-0.121097	0.039085	0.0436049	0.0436049	1.42141e-15	-4.06693	-2.77714	1	5.38736e-05	0.00565222	1	1
Hjurp	1.47347e-17	-0.127463	-0.122388	0.0395025	0.0440707	0.0440707	3.73008e-16	-2.89223	-2.77709	1	0.00396128	0.00565302	1	1
Ormdl3	2.8697e-16	-0.155517	0.123814	0.0399654	0.0445872	0.0445872	7.18046e-15	-3.48792	2.7769	1	0.000521759	0.00565625	1	1
Gm5350	1.17763e-16	-0.109864	0.124185	0.0401096	0.044748	0.044748	2.93603e-15	-2.45516	2.7752	1	0.0143597	0.00568563	1	1
Amigo1	1.40119e-16	-0.0949147	-0.122957	0.0397205	0.044314	0.044314	3.52762e-15	-2.14187	-2.77468	1	0.0325987	0.00569461	1	1
Pcdhb18	-9.91468e-17	0.00081218	-0.124132	0.0401119	0.0447506	0.0447506	-2.47176e-15	0.018149	-2.77386	1	0.985526	0.00570874	1	1
Gm28187	2.71243e-16	-0.17943	-0.12088	0.0390665	0.0435843	0.0435843	6.94311e-15	-4.11685	-2.77347	1	4.36887e-05	0.00571554	1	1
Gm15698	-5.85075e-16	-0.136928	0.123863	0.0400348	0.0446646	0.0446646	-1.46142e-14	-3.06569	2.77319	1	0.00226757	0.00572045	1	1
Soga3	1.73372e-16	-0.213805	-0.11976	0.0387155	0.0431927	0.0431927	4.4781e-15	-4.95001	-2.77268	1	9.6111e-07	0.00572921	1	0.0280904
Gm14735	-3.94225e-16	-0.154957	-0.121494	0.0392868	0.0438301	0.0438301	-1.00345e-14	-3.5354	-2.77194	1	0.000437963	0.00574217	1	1
Gm9144	2.2818e-16	-2.35059e-05	-0.124037	0.0401105	0.044749	0.044749	5.68879e-15	-0.000525282	-2.77183	1	0.999581	0.00574404	1	1
Pam	-9.67551e-17	-0.141184	-0.12183	0.0393997	0.043956	0.043956	-2.45573e-15	-3.21195	-2.77163	1	0.00138766	0.00574748	1	1
Gm26512	2.90941e-16	0.106404	-0.124045	0.0401175	0.0447569	0.0447569	7.25222e-15	2.37737	-2.77153	1	0.0177432	0.00574923	1	1
Gm28722	-2.15288e-17	-0.17476	0.123295	0.0398794	0.0444912	0.0444912	-5.39847e-16	-3.92796	2.77123	1	9.54389e-05	0.00575458	1	1
Mrpl41	2.62918e-16	-0.133148	0.123745	0.0400475	0.0446787	0.0446787	6.56515e-15	-2.98012	2.76965	1	0.00299586	0.00578209	1	1
Klhl28	-7.48775e-16	-0.0560186	-0.12332	0.0399255	0.0445426	0.0445426	-1.87543e-14	-1.25764	-2.76858	1	0.209002	0.00580096	1	1
Gm10176	-1.77385e-17	-0.0747824	-0.123034	0.0398351	0.0444418	0.0444418	-4.45298e-16	-1.6827	-2.76842	1	0.0929433	0.00580377	1	1
Cyp26b1	2.22878e-16	-0.0971645	0.123906	0.0401356	0.0447771	0.0447771	5.55312e-15	-2.16996	2.76718	1	0.0303945	0.00582564	1	1
4933438K21Rik	1.34613e-16	-0.0908661	-0.122617	0.0397473	0.0443438	0.0443438	3.38671e-15	-2.04912	-2.76514	1	0.0408765	0.0058617	1	1
Akap10	-1.40586e-16	-0.0993621	0.123802	0.0401321	0.0447731	0.0447731	-3.50309e-15	-2.21924	2.76509	1	0.0268372	0.00586249	1	1
Dffb	2.47632e-16	-0.151343	0.12334	0.0399833	0.0446072	0.0446072	6.19338e-15	-3.3928	2.76502	1	0.000736552	0.00586385	1	1
Calb2	-1.0204e-15	-0.126492	-0.121851	0.0395137	0.0440832	0.0440832	-2.58239e-14	-2.8694	-2.76412	1	0.00425472	0.00587984	1	1
ERV2-4_STr-I	-1.40962e-16	0.0977856	-0.123753	0.040135	0.0447764	0.0447764	-3.5122e-15	2.18386	-2.7638	1	0.0293519	0.00588549	1	1
Trim9	1.65333e-16	0.377608	0.111974	0.0363244	0.0405251	0.0405251	4.55156e-15	9.31788	2.76307	1	2.12755e-19	0.00589859	1	6.35221e-15
Runx1t1	2.17336e-15	-0.187532	-0.120159	0.0389923	0.0435015	0.0435015	5.57382e-14	-4.31093	-2.76218	1	1.89484e-05	0.00591448	1	0.54558
Ankrd55	4.3913e-16	-0.170478	-0.120565	0.0391545	0.0436825	0.0436825	1.12153e-14	-3.90266	-2.76002	1	0.000105718	0.00595314	1	1
Clcn5	1.92858e-16	-0.0502296	-0.123021	0.0399527	0.044573	0.044573	4.82715e-15	-1.12691	-2.75999	1	0.260225	0.00595361	1	1
Hhat	-5.67349e-17	-0.183704	-0.120163	0.0390305	0.0435442	0.0435442	-1.4536e-15	-4.2188	-2.75955	1	2.82857e-05	0.00596155	1	0.8118
Med12l	-2.2593e-16	-0.211405	-0.119261	0.0387469	0.0432277	0.0432277	-5.83091e-15	-4.8905	-2.7589	1	1.28764e-06	0.00597335	1	0.0375992
Agl	-8.38547e-18	-0.096025	-0.122247	0.0397185	0.0443117	0.0443117	-2.11123e-16	-2.16704	-2.75879	1	0.0306178	0.00597531	1	1
Gm10556	-7.19985e-16	-0.0138453	-0.123353	0.0400793	0.0447143	0.0447143	-1.7964e-14	-0.309639	-2.75869	1	0.756941	0.0059772	1	1
Dmd	-3.0796e-16	-0.254161	-0.117684	0.0382442	0.0426669	0.0426669	-8.05246e-15	-5.95685	-2.7582	1	4.34246e-09	0.00598599	1	0.000128407
Gm12484	-9.42438e-17	0.0080285	-0.123481	0.0401299	0.0447707	0.0447707	-2.34847e-15	0.179325	-2.75808	1	0.857742	0.00598812	1	1
Pmepa1os	3.19407e-17	0.00337486	-0.123402	0.040121	0.0447608	0.0447608	7.9611e-16	0.0753977	-2.75692	1	0.939923	0.00600921	1	1
Ak6	2.57406e-16	-0.0148873	0.123437	0.0401421	0.0447843	0.0447843	6.41236e-15	-0.332422	2.75624	1	0.739685	0.00602146	1	1
Tubgcp3	-2.23955e-16	-0.0900676	-0.122237	0.0397546	0.044352	0.044352	-5.63344e-15	-2.03075	-2.75607	1	0.0427133	0.00602457	1	1
Gm29095	1.58245e-16	-0.0949201	-0.122103	0.0397263	0.0443204	0.0443204	3.98339e-15	-2.14168	-2.75501	1	0.0326139	0.00604391	1	1
Gm5177	-3.07658e-16	0.196772	0.119567	0.0389024	0.0434012	0.0434012	-7.90846e-15	4.53379	2.75493	1	6.97322e-06	0.00604547	1	0.202112
Depdc5	-3.96318e-16	-0.162866	-0.120546	0.0392245	0.0437605	0.0437605	-1.01039e-14	-3.72176	-2.75468	1	0.0002161	0.00604993	1	1
Gm10118	2.73985e-16	-0.0436298	-0.122847	0.0399811	0.0446047	0.0446047	6.85286e-15	-0.978144	-2.75414	1	0.32839	0.00605989	1	1
Aqr	-3.23589e-16	-0.150535	-0.120838	0.0393299	0.0438782	0.0438782	-8.22757e-15	-3.43075	-2.75395	1	0.000642512	0.00606333	1	1
Gm5441	1.62458e-16	-0.0858344	-0.122207	0.0397795	0.0443797	0.0443797	4.08396e-15	-1.93409	-2.75367	1	0.0535635	0.0060685	1	1
Usp40	-1.34051e-17	0.0125527	0.123091	0.0400843	0.0447198	0.0447198	-3.34422e-16	0.280696	2.7525	1	0.779038	0.00608982	1	1
Gm4945	2.91568e-16	-0.123838	0.123034	0.0400775	0.0447122	0.0447122	7.27511e-15	-2.76966	2.7517	1	0.00578187	0.00610464	1	1
Prpf8	-1.10915e-16	0.0241295	-0.123265	0.0401561	0.0447999	0.0447999	-2.76208e-15	0.538606	-2.75146	1	0.590355	0.00610891	1	1
Rheb	-5.40708e-17	0.313997	0.114826	0.037407	0.0417329	0.0417329	-1.44547e-15	7.52396	2.75144	1	1.91021e-13	0.00610934	1	5.68861e-09
Mtss1	4.79319e-16	-0.177654	-0.119958	0.0390914	0.0436121	0.0436121	1.22615e-14	-4.0735	-2.75058	1	5.24142e-05	0.0061253	1	1
Efnb2	-1.62577e-16	-0.0364124	-0.122768	0.0400093	0.0446362	0.0446362	-4.06348e-15	-0.81576	-2.75041	1	0.414955	0.00612845	1	1
Rnf20	4.23147e-16	0.0332506	-0.123202	0.0401659	0.0448109	0.0448109	1.0535e-14	0.742021	-2.74938	1	0.45836	0.00614745	1	1
Gpr161	-2.31728e-15	-0.0215472	-0.122791	0.0400597	0.0446924	0.0446924	-5.78457e-14	-0.482123	-2.74747	1	0.629891	0.00618295	1	1
L1-2_Cpo	-1.25802e-15	0.0881813	-0.123064	0.0401524	0.0447958	0.0447958	-3.13311e-14	1.96852	-2.74722	1	0.0494602	0.00618746	1	1
Gm28237	-2.16498e-16	-0.214638	-0.118642	0.0387162	0.0431935	0.0431935	-5.59192e-15	-4.96921	-2.74675	1	8.74033e-07	0.00619626	1	0.0255576
C2cd4c	1.20014e-16	-0.127518	0.122776	0.0400675	0.0447011	0.0447011	2.99528e-15	-2.85269	2.74661	1	0.00448173	0.00619896	1	1
Pantr1	-1.46401e-15	-0.0610979	-0.122241	0.0399086	0.0445238	0.0445238	-3.66841e-14	-1.37225	-2.74552	1	0.170488	0.00621921	1	1
Ogt	2.78206e-16	-0.139218	-0.120749	0.0394237	0.0439828	0.0439828	7.05682e-15	-3.16529	-2.74537	1	0.00162633	0.0062222	1	1
Slc25a42	9.90329e-17	-0.00967338	0.122887	0.0401358	0.0447773	0.0447773	2.46744e-15	-0.216033	2.74441	1	0.829034	0.00624002	1	1
Ache	-2.63657e-16	-0.140093	-0.120588	0.0394179	0.0439763	0.0439763	-6.68876e-15	-3.18565	-2.74212	1	0.00151788	0.00628327	1	1
Gm15800	1.49822e-16	-0.192661	-0.119127	0.0389489	0.0434531	0.0434531	3.84662e-15	-4.43378	-2.74151	1	1.09794e-05	0.00629476	1	0.317392
Plet1	8.07706e-16	-0.160638	0.122128	0.0399473	0.044567	0.044567	2.02193e-14	-3.6044	2.74033	1	0.000338376	0.00631718	1	1
Slc7a14	1.8828e-17	0.134297	0.120647	0.0394632	0.0440269	0.0440269	4.77103e-16	3.05033	2.74031	1	0.00238491	0.0063175	1	1
Gm29183	-1.75254e-16	-0.154232	0.122209	0.0399743	0.0445971	0.0445971	-4.38416e-15	-3.45834	2.74029	1	0.000581314	0.00631796	1	1
Gm25083	-3.04298e-16	0.12793	-0.122403	0.0400673	0.0447008	0.0447008	-7.59467e-15	2.86192	-2.73826	1	0.00435499	0.00635646	1	1
Gm12962	-1.85281e-17	-0.0221027	-0.122331	0.0400605	0.0446932	0.0446932	-4.62504e-16	-0.494543	-2.73713	1	0.6211	0.00637813	1	1
Abat	-8.21116e-16	-0.135173	-0.120473	0.0394577	0.0440207	0.0440207	-2.081e-14	-3.07067	-2.73674	1	0.00223061	0.00638556	1	1
Asb1	-1.18115e-16	-0.0345884	-0.122111	0.0400197	0.0446478	0.0446478	-2.95142e-15	-0.774696	-2.73499	1	0.438819	0.0064192	1	1
Nceh1	-5.36254e-16	-0.174427	-0.119366	0.0391271	0.043652	0.043652	-1.37054e-14	-3.99586	-2.7345	1	7.23285e-05	0.00642879	1	1
Gm2606	3.93033e-17	0.402092	0.109428	0.0358707	0.040019	0.040019	1.09569e-15	10.0475	2.7344	1	4.3699e-22	0.00643066	1	1.30555e-17
Abi2	-2.17356e-16	-0.0320962	-0.122064	0.0400289	0.044658	0.044658	-5.42997e-15	-0.718712	-2.7333	1	0.472593	0.00645179	1	1
Zdhhc13	5.37443e-16	-0.0321609	0.122451	0.0401683	0.0448135	0.0448135	1.33798e-14	-0.71766	2.73246	1	0.473241	0.00646816	1	1
Arrb1	4.10304e-17	-0.0914797	-0.121183	0.0397532	0.0443504	0.0443504	1.03213e-15	-2.06266	-2.7324	1	0.0395674	0.0064693	1	1
Cited2	2.51102e-16	0.0322564	-0.122435	0.0401685	0.0448137	0.0448137	6.25122e-15	0.71979	-2.73208	1	0.47193	0.00647549	1	1
Mrpl32	2.0592e-16	-0.0979498	0.122346	0.0401393	0.0447812	0.0447812	5.13014e-15	-2.1873	2.73208	1	0.0290991	0.00647551	1	1
Gabra3	-3.01117e-16	-0.0288713	-0.122023	0.0400402	0.0446706	0.0446706	-7.52036e-15	-0.646316	-2.73162	1	0.518318	0.00648442	1	1
Lppr3	-6.57422e-16	-0.221502	-0.117763	0.0386458	0.043115	0.043115	-1.70115e-14	-5.13748	-2.73137	1	3.75083e-07	0.00648924	1	0.0110015
Gm17116	-3.01443e-16	0.0334853	-0.122385	0.0401697	0.0448151	0.0448151	-7.50424e-15	0.747187	-2.73089	1	0.455238	0.00649862	1	1
Eif2ak2	4.98895e-16	-0.134694	-0.120152	0.0394638	0.0440276	0.0440276	1.26418e-14	-3.05931	-2.72903	1	0.00231568	0.00653504	1	1
Ntsr2	-6.62783e-17	-0.102192	0.122145	0.040132	0.044773	0.044773	-1.65151e-15	-2.28244	2.72808	1	0.0228059	0.00655351	1	1
Rfx5	1.68819e-16	-0.0835748	-0.12112	0.0397994	0.044402	0.044402	4.24175e-15	-1.88223	-2.72782	1	0.0602797	0.0065588	1	1
Fam53b	-2.92035e-16	0.346358	0.11224	0.0368951	0.0411619	0.0411619	-7.91526e-15	8.41454	2.72679	1	2.79977e-16	0.00657889	1	8.35002e-12
Cog6	1.27259e-15	-0.137506	-0.119977	0.0394431	0.0440044	0.0440044	3.2264e-14	-3.12482	-2.72649	1	0.00186345	0.00658496	1	1
Adam22	4.77124e-16	-0.272399	-0.115608	0.0380189	0.0424156	0.0424156	1.25497e-14	-6.42216	-2.7256	1	2.7016e-10	0.00660253	1	8.01647e-06
Arnt2	-2.01251e-16	-0.202341	-0.118112	0.038856	0.0433495	0.0433495	-5.17941e-15	-4.66767	-2.72466	1	3.74682e-06	0.00662111	1	0.10889
Fsd2	1.14159e-16	-0.0153528	-0.121836	0.0400831	0.0447185	0.0447185	2.84807e-15	-0.34332	-2.72452	1	0.731476	0.00662388	1	1
1700120C14Rik	1.40822e-16	0.0249525	0.121739	0.0400547	0.0446867	0.0446867	3.51575e-15	0.558387	2.72427	1	0.576785	0.00662881	1	1
Nubp2	3.87442e-15	-0.0370414	0.12209	0.0401737	0.0448196	0.0448196	9.64416e-14	-0.826455	2.72403	1	0.408868	0.00663357	1	1
Ubn2	-1.13966e-16	-0.146005	-0.119667	0.0393768	0.0439305	0.0439305	-2.89425e-15	-3.32354	-2.72401	1	0.000941951	0.00663384	1	1
Ddost	3.39172e-16	0.0124136	0.121829	0.0400912	0.0447276	0.0447276	8.46001e-15	0.277539	2.7238	1	0.78146	0.00663816	1	1
Gm26629	3.23422e-17	-0.124365	-0.120147	0.0395419	0.0441147	0.0441147	8.17924e-16	-2.81912	-2.72351	1	0.00497159	0.00664374	1	1
CAVID1C	-6.89296e-16	-0.00189164	-0.121868	0.0401172	0.0447565	0.0447565	-1.71821e-14	-0.0422651	-2.72291	1	0.966301	0.00665575	1	1
Noc4l	2.08162e-16	0.024417	0.121681	0.0400567	0.044689	0.044689	5.19669e-15	0.546377	2.72283	1	0.585006	0.00665735	1	1
Gprin1	-2.5217e-16	-0.010985	-0.121734	0.0400955	0.0447324	0.0447324	-6.28924e-15	-0.245571	-2.72138	1	0.806097	0.0066863	1	1
Ulk2	-5.02768e-16	-0.133418	-0.119832	0.0394761	0.0440412	0.0440412	-1.2736e-14	-3.0294	-2.7209	1	0.00255388	0.00669587	1	1
Oxsm	-4.43273e-17	-0.0740655	-0.12097	0.039852	0.0444607	0.0444607	-1.1123e-15	-1.66587	-2.72082	1	0.0962526	0.00669741	1	1
Prpf38b	3.2185e-16	0.361639	0.111197	0.0366336	0.0408701	0.0408701	8.78563e-15	8.84848	2.72074	1	9.51489e-18	0.00669904	1	2.83934e-13
Wtap	-1.41272e-16	-0.148112	0.121409	0.0400004	0.0446262	0.0446262	-3.53177e-15	-3.31894	2.72058	1	0.000957337	0.00670231	1	1
Gm14443	-4.75529e-17	-0.187085	-0.118406	0.0390116	0.0435231	0.0435231	-1.21894e-15	-4.29853	-2.72053	1	2.00067e-05	0.0067032	1	0.575832
Pim3	-2.68707e-16	0.0637709	0.121083	0.0399029	0.0445175	0.0445175	-6.73402e-15	1.43249	2.7199	1	0.152515	0.00671599	1	1
Grm8	-2.0568e-16	0.0318978	-0.121885	0.0401705	0.044816	0.044816	-5.12017e-15	0.71175	-2.71967	1	0.476891	0.00672057	1	1
Gm10482	3.128e-16	-0.0692761	-0.120983	0.0398765	0.044488	0.044488	7.84422e-15	-1.55719	-2.71946	1	0.119944	0.00672472	1	1
Gm17669	-2.7218e-16	-0.00331952	-0.121704	0.0401147	0.0447538	0.0447538	-6.78504e-15	-0.0741729	-2.7194	1	0.940897	0.00672586	1	1
Col9a3	5.40012e-16	0.0413069	-0.121796	0.0401775	0.0448238	0.0448238	1.34407e-14	0.921538	-2.71721	1	0.357133	0.00677007	1	1
Adra1d	5.95166e-17	0.0433051	0.121228	0.0399917	0.0446165	0.0446165	1.48822e-15	0.970607	2.71711	1	0.332128	0.00677203	1	1
Pik3c2b	-5.10728e-16	-0.0561838	-0.121063	0.0399383	0.0445569	0.0445569	-1.27879e-14	-1.26094	-2.71705	1	0.20781	0.00677326	1	1
Usp31	2.61242e-16	0.0695651	-0.121701	0.040176	0.0448221	0.0448221	6.50242e-15	1.55203	-2.71519	1	0.121174	0.00681097	1	1
Gm15743	-2.21754e-16	-0.0788658	0.121622	0.0401686	0.0448138	0.0448138	-5.52059e-15	-1.75985	2.71395	1	0.078933	0.00683633	1	1
Rpl26-ps2	-1.06538e-16	0.00146705	-0.121485	0.0401265	0.0447669	0.0447669	-2.65506e-15	0.0327708	-2.71372	1	0.973868	0.00684084	1	1
Cpa6	-3.21832e-16	-0.115139	-0.119869	0.0396097	0.0441903	0.0441903	-8.12509e-15	-2.60553	-2.71256	1	0.00939665	0.00686458	1	1
Gm15608	-1.76375e-16	0.0315199	-0.121554	0.0401717	0.0448173	0.0448173	-4.39053e-15	0.703297	-2.7122	1	0.482138	0.0068719	1	1
Gm8444	-2.19058e-16	-0.117692	0.121309	0.0400991	0.0447363	0.0447363	-5.46292e-15	-2.63079	2.71165	1	0.00873352	0.00688319	1	1
Cntnap4	7.15924e-17	-0.128112	-0.11955	0.0395184	0.0440885	0.0440885	1.81162e-15	-2.90579	-2.71159	1	0.00379587	0.00688445	1	1
Afg3l1	-1.72699e-18	-0.0656934	-0.120618	0.0398965	0.0445103	0.0445103	-4.32868e-17	-1.47591	-2.70989	1	0.140482	0.00691954	1	1
Uba6	-5.7393e-16	-0.054188	-0.120768	0.0399489	0.0445688	0.0445688	-1.43666e-14	-1.21583	-2.7097	1	0.22452	0.00692334	1	1
Dlec1	-1.91329e-17	-0.107907	-0.11986	0.0396588	0.0442451	0.0442451	-4.82439e-16	-2.43885	-2.70901	1	0.0150178	0.00693755	1	1
Dzank1	5.54952e-17	-0.174659	-0.118269	0.0391339	0.0436595	0.0436595	1.41808e-15	-4.00049	-2.7089	1	7.09625e-05	0.00693982	1	1
Gm26569	-1.94619e-16	-0.0348892	0.121411	0.0401751	0.0448211	0.0448211	-4.84427e-15	-0.778411	2.7088	1	0.436628	0.00694202	1	1
Zfp882	-1.32718e-17	-0.120908	-0.119576	0.039571	0.0441472	0.0441472	-3.35393e-16	-2.73875	-2.70858	1	0.00634716	0.00694652	1	1
Acbd5	-5.77097e-17	-0.0899682	-0.120156	0.0397689	0.044368	0.044368	-1.45113e-15	-2.02777	-2.70817	1	0.0430169	0.00695503	1	1
Gm13652	1.07576e-16	-0.104303	-0.11986	0.0396824	0.0442714	0.0442714	2.71094e-15	-2.356	-2.70738	1	0.0187879	0.00697136	1	1
Cmbl	8.49552e-17	0.120837	-0.121091	0.0400912	0.0447276	0.0447276	2.11905e-15	2.70163	-2.7073	1	0.00709152	0.00697311	1	1
Gm7120	-1.44989e-16	0.0776584	0.120322	0.0398371	0.044444	0.044444	-3.63955e-15	1.74733	2.70728	1	0.0810824	0.00697346	1	1
Gm26730	-1.8553e-16	-0.113669	-0.119664	0.0396212	0.0442032	0.0442032	-4.68259e-15	-2.57151	-2.70714	1	0.010361	0.00697638	1	1
Gtf2f2	3.97107e-17	-0.0317195	0.121285	0.040173	0.0448188	0.0448188	9.88491e-16	-0.707729	2.70613	1	0.479384	0.00699743	1	1
Slc5a11	-3.83639e-16	0.0169789	0.120972	0.040083	0.0447184	0.0447184	-9.57111e-15	0.379685	2.7052	1	0.704311	0.00701662	1	1
Gm26020	4.71275e-16	0.0351152	-0.121213	0.0401761	0.0448222	0.0448222	1.17302e-14	0.783433	-2.7043	1	0.433677	0.00703557	1	1
Pdia3	2.56619e-16	0.0510673	0.120563	0.0399636	0.0445852	0.0445852	6.42131e-15	1.14539	2.7041	1	0.252497	0.00703977	1	1
Fgd4	-4.86888e-16	-0.177598	-0.117957	0.0391084	0.0436311	0.0436311	-1.24497e-14	-4.07044	-2.70352	1	5.30887e-05	0.00705192	1	1
Gm27004	-3.36157e-16	0.136623	0.119004	0.0394573	0.0440203	0.0440203	-8.51952e-15	3.10364	2.7034	1	0.00199993	0.00705447	1	1
4930473D10Rik	2.69784e-16	-0.00487464	0.121049	0.0401356	0.044777	0.044777	6.72181e-15	-0.108865	2.70337	1	0.913346	0.00705508	1	1
Scpep1os	3.92592e-16	-0.00340193	0.121038	0.0401327	0.0447738	0.0447738	9.78236e-15	-0.0759804	2.70331	1	0.93946	0.00705616	1	1
Gm16253	-5.85652e-17	-0.0574759	0.121185	0.0401828	0.0448297	0.0448297	-1.45747e-15	-1.28209	2.70324	1	0.200296	0.00705776	1	1
Ptpdc1	-4.62124e-15	-0.0487811	-0.120543	0.0399734	0.0445961	0.0445961	-1.15608e-13	-1.09384	-2.70299	1	0.274455	0.00706297	1	1
Zbtb3	1.60504e-16	-0.0393756	0.121149	0.0401792	0.0448257	0.0448257	3.9947e-15	-0.878415	2.70267	1	0.380064	0.00706963	1	1
Ccdc186	-1.1085e-15	-0.0812653	-0.120059	0.0398191	0.044424	0.044424	-2.78384e-14	-1.82931	-2.70256	1	0.0678403	0.00707198	1	1
Thoc2	-1.23146e-16	-0.0960385	-0.119683	0.0397356	0.0443308	0.0443308	-3.09912e-15	-2.1664	-2.69976	1	0.0306662	0.00713109	1	1
Tm9sf4	-5.67695e-16	-0.124738	-0.119105	0.0395466	0.04412	0.04412	-1.43551e-14	-2.82724	-2.69958	1	0.00484885	0.00713492	1	1
MST_I	6.40027e-16	0.0859429	-0.120947	0.0401626	0.0448072	0.0448072	1.59359e-14	1.91806	-2.69927	1	0.055569	0.00714153	1	1
D630003M21Rik	-1.09874e-16	-0.0584389	0.12099	0.0401834	0.0448304	0.0448304	-2.73432e-15	-1.30355	2.69883	1	0.192876	0.00715069	1	1
Gm28580	3.35997e-16	0.14134	-0.120516	0.0400277	0.0446567	0.0446567	8.3941e-15	3.16503	-2.69872	1	0.00162778	0.00715317	1	1
Lbh	-4.34755e-16	0.0922977	-0.120805	0.0401538	0.0447974	0.0447974	-1.08272e-14	2.06034	-2.69671	1	0.0397893	0.007196	1	1
Stag1	-1.30232e-16	-0.0865242	-0.119708	0.0397918	0.0443935	0.0443935	-3.27284e-15	-1.94903	-2.69651	1	0.0517496	0.00720018	1	1
Rfx3	-1.08699e-16	0.236006	0.115771	0.0384919	0.0429433	0.0429433	-2.82394e-15	5.49575	2.69591	1	5.71857e-08	0.00721295	1	0.00168463
Gpr101	-4.41409e-16	0.108567	-0.120667	0.0401231	0.0447631	0.0447631	-1.10014e-14	2.42537	-2.69567	1	0.0155817	0.00721808	1	1
Gm26727	7.90045e-16	-0.130228	0.12049	0.0400652	0.0446985	0.0446985	1.9719e-14	-2.91348	2.69561	1	0.0037049	0.00721952	1	1
Gm26825	-1.4509e-16	0.0652592	-0.12079	0.0401818	0.0448286	0.0448286	-3.61085e-15	1.45575	-2.69448	1	0.145976	0.00724375	1	1
Hsd3b2	-6.51962e-16	-0.127612	-0.118783	0.0395277	0.0440989	0.0440989	-1.64938e-14	-2.89378	-2.69355	1	0.00394214	0.00726367	1	1
Ccnl2	3.58297e-17	-0.0589676	0.120751	0.0401842	0.0448313	0.0448313	8.91636e-16	-1.31532	2.69345	1	0.188895	0.00726582	1	1
Gm23158	2.29057e-16	-0.110395	0.120546	0.0401193	0.0447588	0.0447588	5.70939e-15	-2.46645	2.69323	1	0.0139193	0.00727064	1	1
Dhtkd1	3.59889e-17	-0.0394132	-0.120224	0.0400125	0.0446397	0.0446397	8.99441e-16	-0.882918	-2.69321	1	0.377628	0.00727108	1	1
Tbl1x	-3.52858e-16	-0.131721	-0.118664	0.0394977	0.0440653	0.0440653	-8.93364e-15	-2.98922	-2.69291	1	0.00290934	0.00727744	1	1
Rragd	-2.49678e-16	0.070954	-0.120704	0.0401787	0.0448252	0.0448252	-6.21418e-15	1.58291	-2.69278	1	0.11396	0.00728023	1	1
Skp2	-2.4407e-16	-0.00676749	-0.120504	0.0401125	0.0447513	0.0447513	-6.08464e-15	-0.151224	-2.69276	1	0.879849	0.00728077	1	1
Sh2d1a	-1.41014e-16	-0.0148634	-0.120369	0.0400921	0.0447285	0.0447285	-3.51726e-15	-0.332302	-2.6911	1	0.739775	0.00731656	1	1
Atf3	5.74409e-16	0.432921	0.105855	0.03526	0.0393376	0.0393376	1.62907e-14	11.0053	2.69094	1	7.98569e-26	0.00731998	1	2.38676e-21
Rogdi	1.95771e-16	-0.128174	0.12029	0.0400721	0.0447062	0.0447062	4.88546e-15	-2.86703	2.69068	1	0.00428622	0.00732561	1	1
Agrn	-2.07743e-16	-0.169965	-0.117622	0.0391831	0.0437144	0.0437144	-5.30185e-15	-3.88808	-2.69068	1	0.000112109	0.0073257	1	1
Bcl2l11	-3.63158e-17	0.0117656	-0.120521	0.0401508	0.044794	0.044794	-9.04486e-16	0.26266	-2.69056	1	0.792901	0.00732832	1	1
Bves	2.88673e-17	-0.0418209	0.1206	0.0401828	0.0448297	0.0448297	7.18399e-16	-0.932885	2.69018	1	0.351248	0.00733654	1	1
Tbr1	1.48185e-16	0.00890124	-0.120447	0.0401461	0.0447888	0.0447888	3.69114e-15	0.198738	-2.68923	1	0.842534	0.00735712	1	1
Vwa3a	-8.10746e-17	-0.0823385	0.120422	0.0401689	0.0448142	0.0448142	-2.01834e-15	-1.83733	2.68713	1	0.0666466	0.00740301	1	1
Gm11942	5.37094e-16	0.0736558	-0.120437	0.0401776	0.0448239	0.0448239	1.3368e-14	1.64323	-2.68688	1	0.100851	0.00740851	1	1
Arhgef40	-9.23017e-17	-0.0494286	0.120454	0.0401857	0.044833	0.044833	-2.29688e-15	-1.10251	2.68673	1	0.270676	0.00741187	1	1
LTR45	3.83682e-16	0.0202645	-0.120379	0.0401643	0.044809	0.044809	9.55281e-15	0.45224	-2.68648	1	0.651256	0.0074173	1	1
Ube2d1	-1.0326e-16	-0.0540983	-0.119745	0.0399553	0.0445759	0.0445759	-2.58438e-15	-1.21362	-2.68632	1	0.225361	0.00742084	1	1
B3gat2	8.572e-17	-0.152139	0.119836	0.039988	0.0446123	0.0446123	2.14364e-15	-3.41025	2.68617	1	0.000691828	0.00742413	1	1
Gm11131	-1.0004e-16	-0.0656797	-0.119518	0.0399033	0.0445178	0.0445178	-2.50708e-15	-1.47536	-2.68472	1	0.140632	0.00745598	1	1
Gm13180	7.28486e-16	0.053321	0.119682	0.0399591	0.0445801	0.0445801	1.82308e-14	1.19607	2.68465	1	0.232133	0.00745752	1	1
Gm5527	5.80532e-16	0.0779378	0.119302	0.039842	0.0444495	0.0444495	1.45709e-14	1.7534	2.68398	1	0.0800347	0.00747229	1	1
Tnrc6a	4.05482e-17	-0.311423	-0.112205	0.0374765	0.0418105	0.0418105	1.08196e-15	-7.44845	-2.68367	1	3.23468e-13	0.00747927	1	9.63094e-09
MLT1H_I	3.99047e-17	0.0814892	-0.120242	0.0401705	0.044816	0.044816	9.93384e-16	1.81831	-2.68302	1	0.0695069	0.00749362	1	1
Pik3r6	3.49203e-16	-0.144986	0.119703	0.0400162	0.0446438	0.0446438	8.72653e-15	-3.24762	2.68129	1	0.00122749	0.00753203	1	1
Tox	-2.96881e-16	-0.0828108	-0.119099	0.0398167	0.0444213	0.0444213	-7.45619e-15	-1.86421	-2.68112	1	0.0627709	0.00753584	1	1
Gm22500	-3.29472e-16	-0.0540929	-0.119517	0.0399567	0.0445775	0.0445775	-8.24572e-15	-1.21346	-2.6811	1	0.225423	0.00753615	1	1
Gm27019	-1.32301e-16	-0.0960373	0.120067	0.04015	0.0447931	0.0447931	-3.29517e-15	-2.14402	2.68047	1	0.0324253	0.00755025	1	1
4930433N12Rik	-8.14459e-15	0.0560872	-0.120138	0.0401871	0.0448345	0.0448345	-2.02667e-13	1.25098	-2.6796	1	0.21142	0.00756967	1	1
Gm16223	4.26958e-18	-0.193911	-0.116463	0.0389587	0.043464	0.043464	1.09592e-16	-4.46142	-2.67953	1	9.69307e-06	0.00757125	1	0.280391
Khdrbs2	1.70196e-16	-0.135084	-0.118002	0.0394767	0.0440419	0.0440419	4.31131e-15	-3.06717	-2.67932	1	0.00225653	0.00757587	1	1
Anapc11	-2.08009e-16	-0.0962267	-0.118781	0.0397405	0.0443362	0.0443362	-5.2342e-15	-2.17038	-2.67909	1	0.0303622	0.00758107	1	1
Rnd3	-6.75209e-16	0.202555	0.116155	0.0388707	0.0433659	0.0433659	-1.73706e-14	4.67083	2.67848	1	3.69159e-06	0.00759462	1	0.107296
Kcnt2	1.53011e-16	-0.233096	-0.11509	0.0385335	0.0429897	0.0429897	3.97085e-15	-5.42214	-2.67714	1	8.49042e-08	0.00762473	1	0.00249949
Glrx3	-1.80908e-16	-0.0321573	-0.119593	0.0400423	0.0446729	0.0446729	-4.51793e-15	-0.71984	-2.67709	1	0.471899	0.00762599	1	1
Ercc1	-2.58937e-18	-0.0666033	0.119986	0.0401841	0.0448312	0.0448312	-6.44375e-17	-1.48565	2.67641	1	0.137888	0.00764132	1	1
Ctr9	3.49114e-16	-0.101673	-0.118554	0.0397081	0.0443001	0.0443001	8.79202e-15	-2.2951	-2.67615	1	0.0220655	0.00764714	1	1
Gpr22	-5.04949e-17	0.219528	0.115495	0.038689	0.0431632	0.0431632	-1.30515e-15	5.08599	2.67578	1	4.87141e-07	0.0076555	1	0.0142766
Ccdc167	-1.27822e-16	-0.0620952	-0.119176	0.0399224	0.0445392	0.0445392	-3.20175e-15	-1.39417	-2.67574	1	0.163774	0.00765627	1	1
Pcp4	-6.56095e-17	0.145511	0.1176	0.0393966	0.0439526	0.0439526	-1.66536e-15	3.31064	2.67562	1	0.00098566	0.00765907	1	1
Gm10801	-8.56896e-16	-0.0178919	-0.119656	0.0400872	0.0447231	0.0447231	-2.13758e-14	-0.400059	-2.67549	1	0.689253	0.00766209	1	1
Erf	-8.03887e-17	0.266111	-0.117154	0.039254	0.0437935	0.0437935	-2.04791e-15	6.0765	-2.67514	1	2.16199e-09	0.00766993	1	6.40079e-05
Gm23897	-4.42066e-16	-0.100278	-0.118518	0.0397171	0.0443102	0.0443102	-1.11304e-14	-2.2631	-2.67473	1	0.0239797	0.00767907	1	1
Gm25843	-1.21171e-15	-0.0634625	-0.119104	0.0399164	0.0445325	0.0445325	-3.03562e-14	-1.42508	-2.67454	1	0.154644	0.00768347	1	1
Tigd2	9.15621e-17	-0.0614684	-0.11913	0.0399257	0.0445428	0.0445428	2.29331e-15	-1.37998	-2.6745	1	0.168096	0.00768443	1	1
Prkra	-1.93614e-16	-0.0306549	-0.119484	0.040048	0.0446793	0.0446793	-4.83455e-15	-0.686109	-2.67425	1	0.492904	0.00769007	1	1
Cxcl14	9.30248e-16	-0.120992	-0.118089	0.039581	0.0441583	0.0441583	2.35024e-14	-2.73995	-2.67422	1	0.0063243	0.00769064	1	1
Gm5746	2.19733e-16	-0.055357	0.119865	0.0401882	0.0448358	0.0448358	5.46759e-15	-1.23466	2.67341	1	0.217431	0.00770903	1	1
Gm14890	-9.96362e-17	-0.0261119	-0.119445	0.0400633	0.0446963	0.0446963	-2.48697e-15	-0.584207	-2.67237	1	0.559297	0.00773274	1	1
Trmt2b	6.10381e-17	-0.177113	-0.11662	0.039124	0.0436485	0.0436485	1.56012e-15	-4.05772	-2.6718	1	5.59832e-05	0.00774577	1	1
Gm10287	3.50483e-16	-0.0635845	0.119726	0.0401866	0.0448339	0.0448339	8.72139e-15	-1.41822	2.67044	1	0.156635	0.00777693	1	1
Tmed2	2.32609e-16	0.0068256	0.119477	0.0401175	0.0447569	0.0447569	5.79819e-15	0.152504	2.66947	1	0.87884	0.00779914	1	1
Vstm2a	-5.16859e-16	-0.24114	-0.114475	0.0384409	0.0428864	0.0428864	-1.34455e-14	-5.62275	-2.66926	1	2.86119e-08	0.00780379	1	0.000843794
Maea	2.98714e-16	-3.83621e-05	-0.11948	0.0401331	0.0447742	0.0447742	7.44309e-15	-0.000856789	-2.6685	1	0.999317	0.00782125	1	1
Zfp473	1.05765e-17	-0.117499	-0.117818	0.0396076	0.044188	0.044188	2.67032e-16	-2.65906	-2.66628	1	0.00804129	0.00787247	1	1
B430212C06Rik	9.75808e-16	-0.138994	0.119088	0.0400395	0.0446698	0.0446698	2.43712e-14	-3.11159	2.66595	1	0.00194764	0.00788013	1	1
Cyp2e1	1.67868e-16	0.0140131	0.119267	0.0401001	0.0447374	0.0447374	4.18622e-15	0.31323	2.66593	1	0.754213	0.00788062	1	1
Gm26535	2.72095e-16	-0.111154	0.119308	0.0401211	0.0447608	0.0447608	6.78184e-15	-2.48328	2.66545	1	0.0132851	0.0078917	1	1
Zfp92	-4.5088e-17	-0.00324053	-0.119308	0.0401268	0.0447672	0.0447672	-1.12364e-15	-0.0723861	-2.66508	1	0.942318	0.0079004	1	1
Hsph1	-4.04055e-17	0.32605	0.110773	0.037257	0.0415655	0.0415655	-1.08451e-15	7.84425	2.66502	1	1.95216e-14	0.00790178	1	5.81782e-10
Cxx1a	3.50501e-16	-0.138445	-0.117302	0.0394556	0.0440184	0.0440184	8.88343e-15	-3.14517	-2.66485	1	0.00174052	0.00790576	1	1
Fgfr1	-2.45283e-16	0.202761	0.115544	0.0388738	0.0433693	0.0433693	-6.30972e-15	4.67522	2.6642	1	3.61607e-06	0.00792095	1	0.105108
Grb10	1.18169e-15	-0.162688	-0.116663	0.0392569	0.0437967	0.0437967	3.01015e-14	-3.71461	-2.66375	1	0.000222164	0.00793143	1	1
Vmac	1.46992e-15	-0.160305	0.118718	0.0399557	0.0445764	0.0445764	3.67887e-14	-3.59619	2.66325	1	0.000349001	0.00794299	1	1
Prdx5	-1.11606e-16	0.213303	0.115135	0.0387625	0.0432451	0.0432451	-2.87923e-15	4.93241	2.66237	1	1.04829e-06	0.00796352	1	0.030632
Stub1	-8.29714e-16	-0.0736455	0.119324	0.0401816	0.0448283	0.0448283	-2.06491e-14	-1.64283	2.6618	1	0.100932	0.00797677	1	1
Npy5r	4.5035e-17	0.010331	-0.119216	0.0401544	0.044798	0.044798	1.12155e-15	0.230613	-2.66119	1	0.817693	0.00799116	1	1
Tmod1	1.38531e-15	0.0832375	0.118208	0.03982	0.044425	0.044425	3.47894e-14	1.87367	2.66085	1	0.0614536	0.00799914	1	1
Cd81	2.5276e-16	-0.141244	-0.117026	0.0394354	0.0439959	0.0439959	6.40948e-15	-3.2104	-2.65994	1	0.00139502	0.00802052	1	1
Zfp608	3.381e-16	-0.093661	-0.117979	0.0397613	0.0443595	0.0443595	8.50324e-15	-2.11141	-2.65962	1	0.0351426	0.00802803	1	1
Rsl1	-2.51273e-16	0.00848587	-0.119129	0.0401516	0.0447949	0.0447949	-6.25811e-15	0.189438	-2.65943	1	0.849812	0.00803247	1	1
LTR4B_Str	-1.16228e-15	0.0999553	-0.119101	0.0401458	0.0447884	0.0447884	-2.89516e-14	2.23172	-2.65918	1	0.0259952	0.0080384	1	1
Myo16	1.7795e-15	-0.121123	-0.11741	0.0395849	0.0441626	0.0441626	4.4954e-14	-2.74266	-2.65859	1	0.0062731	0.00805238	1	1
4930429F24Rik	-4.58532e-16	-0.126885	0.118783	0.0400799	0.0447149	0.0447149	-1.14404e-14	-2.83764	2.65645	1	0.00469569	0.00810318	1	1
Arhgef10	2.98827e-15	0.0545382	0.11843	0.0399611	0.0445824	0.0445824	7.47794e-14	1.22331	2.65643	1	0.221683	0.00810351	1	1
Mif	-1.94767e-16	0.0674086	0.118243	0.0399026	0.0445171	0.0445171	-4.88107e-15	1.51422	2.65612	1	0.130488	0.00811085	1	1
Gm16357	-3.69231e-16	-0.00233718	-0.118888	0.0401309	0.0447718	0.0447718	-9.20066e-15	-0.0522019	-2.65541	1	0.958385	0.00812777	1	1
Arpp19	3.73789e-17	0.193062	0.11546	0.0389759	0.0434832	0.0434832	9.59026e-16	4.43992	2.65527	1	1.06801e-05	0.00813111	1	0.308792
Gm6754	-6.01537e-17	0.0346962	-0.119042	0.040185	0.0448322	0.0448322	-1.49692e-15	0.773912	-2.65527	1	0.439282	0.00813113	1	1
Mapk9	-5.45664e-16	-0.0733122	-0.118087	0.0398739	0.0444851	0.0444851	-1.36848e-14	-1.64802	-2.65454	1	0.099863	0.00814857	1	1
Gm22552	-1.30192e-16	0.0696739	-0.119006	0.0401858	0.044833	0.044833	-3.23974e-15	1.55408	-2.65442	1	0.120684	0.00815148	1	1
Cep57l1	3.00207e-17	-0.113188	0.118789	0.0401176	0.044757	0.044757	7.48317e-16	-2.52895	2.65409	1	0.0116909	0.00815927	1	1
Gm12324	7.83705e-17	-0.0291322	-0.118596	0.0400579	0.0446904	0.0446904	1.95643e-15	-0.651867	-2.65372	1	0.514732	0.00816814	1	1
P2rx3	4.44911e-16	-8.55287e-05	0.118761	0.0401368	0.0447784	0.0447784	1.10849e-14	-0.00191004	2.65219	1	0.998477	0.00820476	1	1
Ybx2	2.4509e-16	-0.138095	0.118447	0.0400441	0.044675	0.044675	6.12049e-15	-3.09109	2.65131	1	0.00208498	0.00822601	1	1
Pcdhga5	-1.0276e-16	-0.0423796	-0.118305	0.0400119	0.044639	0.044639	-2.56824e-15	-0.949384	-2.65026	1	0.342801	0.0082513	1	1
Csta1	-1.88378e-16	-0.101103	0.118653	0.0401449	0.0447874	0.0447874	-4.69246e-15	-2.2574	2.64925	1	0.0243353	0.00827569	1	1
Srrm2	-2.93725e-17	-0.173408	-0.115727	0.0391663	0.0436956	0.0436956	-7.49944e-16	-3.96854	-2.64847	1	8.09042e-05	0.00829456	1	1
Dars2	2.07281e-16	-0.0819402	-0.117651	0.0398307	0.0444369	0.0444369	5.20404e-15	-1.84397	-2.64759	1	0.0656719	0.00831598	1	1
Hcfc2	1.1884e-16	-0.11036	-0.117134	0.0396612	0.0442478	0.0442478	2.99638e-15	-2.49414	-2.64722	1	0.0128894	0.0083249	1	1
Gm21156	-2.95647e-16	0.134715	-0.11826	0.0400562	0.0446884	0.0446884	-7.38082e-15	3.01453	-2.64632	1	0.00268047	0.00834692	1	1
Astn2	-2.0236e-16	-0.0668452	-0.117777	0.0399081	0.0445233	0.0445233	-5.07064e-15	-1.50135	-2.64529	1	0.133781	0.00837216	1	1
Gm15823	4.36853e-17	0.0248717	0.11825	0.0400735	0.0447078	0.0447078	1.09013e-15	0.556316	2.64496	1	0.578199	0.00838019	1	1
Scube1	-2.51879e-17	-0.174425	0.117706	0.039891	0.0445042	0.0445042	-6.31418e-16	-3.91929	2.64482	1	9.88495e-05	0.00838345	1	1
Dcbld2	-2.31951e-16	-0.0164009	-0.118294	0.0400985	0.0447357	0.0447357	-5.78454e-15	-0.366618	-2.6443	1	0.714031	0.00839638	1	1
Atxn1	3.84129e-16	0.0325195	-0.118543	0.0401855	0.0448327	0.0448327	9.55889e-15	0.725352	-2.64412	1	0.468514	0.00840065	1	1
Kcnc2	1.02955e-15	-0.226612	-0.113922	0.0386212	0.0430875	0.0430875	2.66577e-14	-5.25933	-2.64397	1	2.00249e-07	0.00840432	1	0.0058839
Map6	-9.55927e-17	-0.112509	-0.11695	0.039648	0.044233	0.044233	-2.41104e-15	-2.54354	-2.64394	1	0.0112187	0.00840504	1	1
Nell2	-1.13354e-16	0.0904451	0.117316	0.0397846	0.0443855	0.0443855	-2.84919e-15	2.03772	2.6431	1	0.0420086	0.00842567	1	1
Gm12503	2.32908e-16	0.102413	-0.118304	0.0401433	0.0447856	0.0447856	5.80192e-15	2.28673	-2.64157	1	0.0225529	0.00846355	1	1
Dhcr7	-7.85123e-16	-0.0331744	-0.118019	0.0400473	0.0446785	0.0446785	-1.96049e-14	-0.742514	-2.64152	1	0.458061	0.00846473	1	1
Gm17615	8.87521e-17	-0.130815	-0.116437	0.0395207	0.044091	0.044091	2.24571e-15	-2.96693	-2.64083	1	0.00312552	0.00848181	1	1
Rims2	-6.42171e-16	-0.096378	-0.117074	0.0397508	0.0443478	0.0443478	-1.61549e-14	-2.17323	-2.63991	1	0.0301463	0.00850446	1	1
Inpp5a	-2.0847e-16	0.086245	-0.118254	0.0401711	0.0448167	0.0448167	-5.18955e-15	1.92439	-2.63861	1	0.0547693	0.00853699	1	1
Actn1	-5.33072e-16	0.0850183	0.117171	0.0398167	0.0444212	0.0444212	-1.33882e-14	1.91391	2.63772	1	0.0560984	0.00855907	1	1
Gucd1	1.89775e-18	-0.124374	-0.116435	0.0395684	0.0441442	0.0441442	4.79613e-17	-2.81745	-2.63761	1	0.00499719	0.00856172	1	1
Prdm2	-2.65806e-16	-0.072046	-0.117356	0.0398848	0.0444973	0.0444973	-6.66433e-15	-1.61911	-2.63738	1	0.10594	0.0085675	1	1
Kcnab1	-9.78862e-17	-0.108041	-0.116749	0.0396792	0.0442678	0.0442678	-2.46694e-15	-2.44062	-2.63732	1	0.0149452	0.00856899	1	1
Glcci1	1.4681e-16	0.0405558	0.117745	0.040022	0.0446503	0.0446503	3.66824e-15	0.908299	2.63704	1	0.364078	0.00857603	1	1
Gm20281	-3.4398e-16	0.104779	-0.118042	0.0401391	0.044781	0.044781	-8.56969e-15	2.33981	-2.63597	1	0.0196147	0.00860271	1	1
Gemin5	-2.49003e-16	-0.0110958	-0.117956	0.0401145	0.0447535	0.0447535	-6.20731e-15	-0.247932	-2.63569	1	0.80427	0.00860987	1	1
4930526L06Rik	1.18549e-16	-0.124986	-0.116327	0.0395647	0.0441401	0.0441401	2.99633e-15	-2.83158	-2.6354	1	0.00478435	0.00861722	1	1
Acox2	9.04288e-17	-0.0396863	0.118149	0.0401918	0.0448398	0.0448398	2.24993e-15	-0.885069	2.63492	1	0.376468	0.00862921	1	1
Rcn3	-2.52711e-16	-0.112247	0.117932	0.0401223	0.0447622	0.0447622	-6.29853e-15	-2.50762	2.63463	1	0.0124128	0.00863647	1	1
Gm28285	-2.11186e-16	0.0144035	-0.118035	0.0401665	0.0448115	0.0448115	-5.25776e-15	0.321425	-2.63403	1	0.747998	0.00865159	1	1
Gm26579	-4.75256e-16	-0.164568	-0.1153	0.0392507	0.0437898	0.0437898	-1.21082e-14	-3.75814	-2.63302	1	0.000187595	0.00867696	1	1
Atg2b	1.26785e-16	-0.0738266	-0.1171	0.0398773	0.0444889	0.0444889	3.17938e-15	-1.65944	-2.63211	1	0.0975406	0.00869995	1	1
Gm13147	-6.48316e-17	0.00771074	-0.117913	0.0401559	0.0447997	0.0447997	-1.6145e-15	0.172116	-2.632	1	0.863403	0.00870279	1	1
Armcx1	1.24376e-15	-0.191169	-0.114468	0.0390035	0.043514	0.043514	3.18885e-14	-4.39328	-2.63061	1	1.31627e-05	0.0087381	1	0.380112
Tacc1	-1.4268e-16	0.369312	0.107235	0.0365398	0.0407654	0.0407654	-3.90478e-15	9.05946	2.63053	1	1.75536e-18	0.00874009	1	5.24026e-14
Gm13025	-2.05789e-16	-0.242596	-0.112797	0.0384386	0.0428838	0.0428838	-5.3537e-15	-5.65706	-2.6303	1	2.3676e-08	0.00874596	1	0.000698396
Tfpt	1.52585e-15	-0.128206	0.117606	0.0400788	0.0447137	0.0447137	3.80712e-14	-2.86726	2.6302	1	0.00428322	0.00874845	1	1
Herc1	3.43898e-16	-0.137592	-0.115825	0.0394731	0.044038	0.044038	8.7122e-15	-3.1244	-2.63012	1	0.00186612	0.00875043	1	1
Rabl3	-1.43232e-16	-0.119613	0.117656	0.0401039	0.0447417	0.0447417	-3.57152e-15	-2.67342	2.62968	1	0.00770879	0.00876176	1	1
Phf11c	-5.73056e-17	0.146184	0.115608	0.039406	0.0439631	0.0439631	-1.45423e-15	3.32515	2.62965	1	0.000936633	0.00876251	1	1
Grin2b	-1.08523e-15	0.230549	-0.116011	0.0395446	0.0441177	0.0441177	-2.74432e-14	5.22576	-2.62958	1	2.38345e-07	0.00876436	1	0.00700044
Popdc3	-1.64789e-16	-0.176578	0.116975	0.0398813	0.0444933	0.0444933	-4.13198e-15	-3.96864	2.62905	1	8.0872e-05	0.00877794	1	1
Gpatch8	3.52231e-16	-0.159393	-0.115259	0.0392969	0.0438414	0.0438414	8.96332e-15	-3.63567	-2.629	1	0.000300629	0.00877915	1	1
Gm6206	-2.84574e-16	0.14169	0.115644	0.0394421	0.0440033	0.0440033	-7.21498e-15	3.21998	2.62808	1	0.00135	0.00880259	1	1
Ngly1	2.29103e-16	-0.0831598	-0.116779	0.0398295	0.0444355	0.0444355	5.7521e-15	-1.87147	-2.62806	1	0.0617575	0.00880315	1	1
Spata45	8.16565e-17	-0.0590985	0.117828	0.0401953	0.0448436	0.0448436	2.0315e-15	-1.31788	2.62753	1	0.188038	0.00881675	1	1
Megf11	-2.87473e-16	0.247909	0.112479	0.0383749	0.0428127	0.0428127	-7.49118e-15	5.79054	2.62724	1	1.12284e-08	0.008824	1	0.000331641
Bbip1	-1.93529e-16	-0.0169626	-0.117517	0.0401009	0.0447383	0.0447383	-4.82605e-15	-0.379152	-2.62676	1	0.704707	0.00883644	1	1
Lrch1	-8.07839e-17	-0.084489	-0.116679	0.0398227	0.044428	0.044428	-2.02859e-15	-1.90171	-2.62624	1	0.0576797	0.00884982	1	1
A130014A01Rik	-5.80153e-17	-0.120074	0.117492	0.040103	0.0447407	0.0447407	-1.44666e-15	-2.68378	2.62606	1	0.00747686	0.00885449	1	1
Bpifc	-1.21101e-16	-0.00333355	-0.117584	0.040135	0.0447764	0.0447764	-3.01735e-15	-0.0744487	-2.62602	1	0.940678	0.00885557	1	1
Gm23723	-7.46999e-17	-0.0998997	0.11762	0.0401504	0.0447935	0.0447935	-1.8605e-15	-2.23023	2.62583	1	0.0260947	0.00886026	1	1
Mettl7a3	-3.72758e-17	-0.0441053	0.117736	0.0401953	0.0448437	0.0448437	-9.27367e-16	-0.983534	2.62547	1	0.325734	0.00886959	1	1
Mgl2	-7.27681e-17	0.0246559	-0.117681	0.0401816	0.0448284	0.0448284	-1.81098e-15	0.550007	-2.62514	1	0.582515	0.00887821	1	1
Brpf1	6.21588e-16	0.0244122	0.117378	0.0400796	0.0447145	0.0447145	1.55088e-14	0.545956	2.62505	1	0.585296	0.00888051	1	1
Cysltr1	-4.9984e-16	-0.0251173	-0.117289	0.0400778	0.0447126	0.0447126	-1.24717e-14	-0.56175	-2.62318	1	0.574493	0.00892881	1	1
Sin3b	-1.14585e-16	0.17055	0.114707	0.039201	0.0437343	0.0437343	-2.92301e-15	3.89969	2.62281	1	0.000106991	0.00893837	1	1
Gm4924	-1.82474e-16	-0.0243947	-0.117251	0.0400803	0.0447153	0.0447153	-4.5527e-15	-0.545555	-2.62216	1	0.585571	0.00895518	1	1
Cspp1	1.45112e-16	-0.219494	-0.113238	0.0387095	0.0431861	0.0431861	3.74875e-15	-5.08253	-2.62209	1	4.95744e-07	0.00895716	1	0.0145273
Rabggtb	4.14501e-16	-0.00471438	0.117448	0.0401525	0.0447959	0.0447959	1.03232e-14	-0.105241	2.62185	1	0.916219	0.00896327	1	1
Nras	-2.44089e-16	-0.0375835	0.117533	0.0401932	0.0448413	0.0448413	-6.07289e-15	-0.838144	2.62109	1	0.402278	0.00898301	1	1
Pianp	-2.16665e-16	-0.207572	-0.113573	0.0388391	0.0433306	0.0433306	-5.57854e-15	-4.79043	-2.62108	1	2.09121e-06	0.00898342	1	0.0609317
Gm24289	-8.6568e-18	-0.0696998	-0.116675	0.0399008	0.044515	0.044515	-2.16958e-16	-1.56576	-2.62103	1	0.117923	0.00898457	1	1
Gm20406	-4.66753e-16	-0.10834	0.117299	0.0401333	0.0447745	0.0447745	-1.16301e-14	-2.41968	2.61977	1	0.0158248	0.00901743	1	1
Cul4b	1.34708e-16	0.0117101	-0.117365	0.0401653	0.0448101	0.0448101	3.35383e-15	0.261328	-2.61916	1	0.793928	0.00903339	1	1
Armcx3	-1.6997e-16	0.164189	0.114716	0.0392587	0.0437987	0.0437987	-4.3295e-15	3.74873	2.61916	1	0.00019461	0.00903344	1	1
Bahcc1	-1.43923e-16	-0.0340941	-0.117017	0.0400495	0.044681	0.044681	-3.59364e-15	-0.763056	-2.61895	1	0.445725	0.00903907	1	1
Tchh	-7.84369e-17	-0.0946826	0.117322	0.0401609	0.0448053	0.0448053	-1.95307e-15	-2.1132	2.61849	1	0.0349884	0.00905102	1	1
Ggps1	-1.80054e-16	0.184194	0.114147	0.0390757	0.0435945	0.0435945	-4.60782e-15	4.22517	2.61837	1	2.75199e-05	0.00905418	1	0.790042
Laptm4b	-1.15907e-16	-0.00560933	-0.117198	0.0401317	0.0447727	0.0447727	-2.88818e-15	-0.125285	-2.61763	1	0.900339	0.00907355	1	1
Thbs3	-5.59507e-16	-0.0722137	0.117338	0.0401897	0.0448374	0.0448374	-1.39216e-14	-1.61057	2.61695	1	0.10779	0.00909137	1	1
Sirt5	-3.844e-16	-0.128278	-0.115452	0.0395467	0.04412	0.04412	-9.72015e-15	-2.90747	-2.61678	1	0.00377585	0.00909601	1	1
6720489N17Rik	-4.16026e-15	-0.0922427	-0.116117	0.0397818	0.0443824	0.0443824	-1.04577e-13	-2.07836	-2.6163	1	0.0380927	0.00910874	1	1
Tbce	1.33447e-16	-0.129494	-0.115381	0.0395382	0.0441105	0.0441105	3.37514e-15	-2.93567	-2.61573	1	0.00345341	0.00912368	1	1
Zfp81	-2.5012e-16	-0.0387852	-0.116795	0.0400338	0.0446635	0.0446635	-6.24773e-15	-0.868387	-2.61501	1	0.385524	0.0091427	1	1
Gm8473	2.72968e-16	-0.147772	-0.114913	0.0393982	0.0439544	0.0439544	6.92845e-15	-3.36194	-2.61437	1	0.000822297	0.00915965	1	1
Isca1	-1.23385e-16	-0.0758266	-0.116294	0.0398719	0.0444828	0.0444828	-3.09453e-15	-1.70463	-2.61436	1	0.0887725	0.00915995	1	1
Tpbg	-3.3911e-16	0.0856721	-0.117168	0.0401754	0.0448215	0.0448215	-8.44074e-15	1.91141	-2.6141	1	0.0564198	0.00916693	1	1
Spic	-4.18958e-16	-0.0924844	-0.116012	0.0397811	0.0443815	0.0443815	-1.05316e-14	-2.08385	-2.61396	1	0.037589	0.00917056	1	1
Oxct1	-8.58118e-16	-0.0436215	-0.116677	0.0400162	0.0446438	0.0446438	-2.14443e-14	-0.977102	-2.6135	1	0.328905	0.00918272	1	1
ETnERV2	1.06818e-15	0.0718533	-0.117173	0.0401906	0.0448384	0.0448384	2.65779e-14	1.60249	-2.61323	1	0.109563	0.00918994	1	1
B230110C06Rik	4.09829e-16	-0.0434708	-0.116642	0.0400169	0.0446447	0.0446447	1.02414e-14	-0.973707	-2.61269	1	0.330588	0.0092044	1	1
Zfp101	-2.44612e-16	-0.211463	-0.113095	0.0388007	0.0432878	0.0432878	-6.30432e-15	-4.88505	-2.61264	1	1.32238e-06	0.00920564	1	0.0386068
Gm28217	3.5313e-15	-0.103013	-0.115756	0.0397183	0.0443115	0.0443115	8.89086e-14	-2.32474	-2.61232	1	0.0204127	0.00921425	1	1
Ctps2	2.05155e-16	-0.241452	-0.112079	0.0384595	0.0429071	0.0429071	5.33431e-15	-5.62731	-2.61212	1	2.79019e-08	0.00921936	1	0.00082291
Klhl6	6.51708e-16	-0.0491096	0.117145	0.0401987	0.0448475	0.0448475	1.62121e-14	-1.09503	2.61206	1	0.273933	0.00922096	1	1
Med17	1.13217e-18	-0.0561255	-0.116433	0.0399657	0.0445875	0.0445875	2.83285e-17	-1.25877	-2.61134	1	0.208594	0.00924022	1	1
Ppp1r1c	1.92128e-16	0.0150249	-0.117027	0.040172	0.0448176	0.0448176	4.78265e-15	0.335246	-2.61119	1	0.737555	0.00924443	1	1
BC025446	1.63234e-19	-0.0687961	-0.116229	0.0399079	0.044523	0.044523	4.09026e-18	-1.54518	-2.61053	1	0.122821	0.00926189	1	1
Rsrc1	7.03322e-17	-0.160029	-0.114422	0.0392978	0.0438423	0.0438423	1.78973e-15	-3.65011	-2.60985	1	0.000284568	0.00928025	1	1
Nhp2	8.10093e-16	-0.091907	0.116942	0.0401668	0.0448118	0.0448118	2.01682e-14	-2.05095	2.60963	1	0.0406974	0.00928618	1	1
Phactr3	-5.09614e-17	-0.0944696	-0.115787	0.0397707	0.04437	0.04437	-1.28138e-15	-2.12913	-2.60958	1	0.0336425	0.00928754	1	1
Pomt2	7.54275e-16	-0.106072	-0.11555	0.0397001	0.0442911	0.0442911	1.89993e-14	-2.39489	-2.60887	1	0.0169257	0.00930651	1	1
Scmh1	-7.01205e-17	-0.162438	-0.114319	0.0392774	0.0438196	0.0438196	-1.78526e-15	-3.70698	-2.60886	1	0.000228805	0.00930687	1	1
Gm7312	-1.29798e-16	-0.0627852	0.116992	0.040197	0.0448455	0.0448455	-3.22904e-15	-1.40003	2.60878	1	0.162011	0.00930882	1	1
Polg2	4.8941e-16	-0.0825119	0.116942	0.0401803	0.044827	0.044827	1.21803e-14	-1.84067	2.60875	1	0.0661539	0.00930974	1	1
Acot10	6.67198e-16	0.0533595	0.116351	0.0399782	0.0446015	0.0446015	1.6689e-14	1.19636	2.60867	1	0.232019	0.00931182	1	1
Gucy1a3	2.00944e-18	-0.131878	-0.115021	0.0395228	0.0440934	0.0440934	5.08424e-17	-2.99089	-2.60857	1	0.00289372	0.00931458	1	1
Gcnt4	1.17878e-15	-0.0534225	-0.116344	0.039978	0.0446012	0.0446012	2.94859e-14	-1.19778	-2.60854	1	0.231467	0.00931537	1	1
Gm22195	-2.08022e-16	-0.0881855	0.116838	0.0401729	0.0448187	0.0448187	-5.17816e-15	-1.96761	2.6069	1	0.0495652	0.00935952	1	1
Gm15472	6.01999e-17	0.0183873	-0.116837	0.0401776	0.0448239	0.0448239	1.49835e-15	0.410213	-2.60658	1	0.681794	0.00936818	1	1
Gm29562	1.64275e-17	0.0596403	-0.116896	0.0401985	0.0448473	0.0448473	4.08658e-16	1.32985	-2.60654	1	0.184063	0.00936926	1	1
Cmah	-2.44327e-17	-0.332405	-0.10811	0.0371814	0.0414812	0.0414812	-6.5712e-16	-8.01338	-2.60623	1	5.67978e-15	0.00937764	1	1.69314e-10
Olfml2b	9.04826e-17	-0.0737985	0.116851	0.04019	0.0448378	0.0448378	2.25137e-15	-1.6459	2.60607	1	0.100299	0.00938199	1	1
Sssca1	-3.96698e-17	-0.114178	0.116628	0.040121	0.0447608	0.0447608	-9.88754e-16	-2.55084	2.60558	1	0.010989	0.00939545	1	1
St8sia4	-7.11353e-17	-0.126508	-0.114975	0.0395631	0.0441384	0.0441384	-1.79802e-15	-2.86618	-2.60487	1	0.00429764	0.00941454	1	1
Tctn1	-2.91219e-16	-0.0193263	-0.116529	0.0400992	0.0447364	0.0447364	-7.26248e-15	-0.432004	-2.6048	1	0.665891	0.00941657	1	1
Ndst4	-7.58282e-18	-0.0324089	-0.116403	0.0400586	0.0446911	0.0446911	-1.89293e-16	-0.725175	-2.60461	1	0.468622	0.00942179	1	1
Extl1	-1.95182e-16	-0.0426356	-0.116291	0.0400221	0.0446504	0.0446504	-4.87686e-15	-0.954875	-2.60448	1	0.340018	0.00942526	1	1
Peak1	-1.45596e-15	-0.0796334	0.116749	0.0401844	0.0448315	0.0448315	-3.62319e-14	-1.77628	2.60416	1	0.076184	0.00943382	1	1
Ddx5	-4.05006e-16	0.202981	0.112993	0.0388933	0.0433911	0.0433911	-1.04133e-14	4.67795	2.60407	1	3.56997e-06	0.00943651	1	0.103779
Gm15572	9.23506e-16	0.0441685	-0.116771	0.0401992	0.044848	0.044848	2.29732e-14	0.984849	-2.60371	1	0.325088	0.00944617	1	1
Ptgr2	1.98904e-16	-0.0540542	-0.116115	0.0399766	0.0445996	0.0445996	4.9755e-15	-1.21199	-2.60349	1	0.225986	0.00945221	1	1
Tardbp	-2.69361e-16	-0.0497916	-0.11615	0.0399944	0.0446195	0.0446195	-6.73498e-15	-1.11592	-2.60313	1	0.264897	0.00946208	1	1
Gm27243	5.06561e-16	-0.0567213	-0.116054	0.0399653	0.0445871	0.0445871	1.2675e-14	-1.27215	-2.60286	1	0.203805	0.00946928	1	1
Gm16286	-3.05818e-16	-0.0255833	0.11668	0.040187	0.0448343	0.0448343	-7.60988e-15	-0.570619	2.60248	1	0.568468	0.00947974	1	1
1600029O15Rik	-9.31666e-17	-0.115291	0.11648	0.0401186	0.0447581	0.0447581	-2.32228e-15	-2.57587	2.60243	1	0.0102325	0.00948112	1	1
Gm7803	9.99414e-17	0.0452504	-0.116676	0.0401999	0.0448488	0.0448488	2.48611e-15	1.00896	-2.60155	1	0.313395	0.00950517	1	1
Gpm6b	1.86614e-16	-0.0897221	0.116552	0.0401715	0.0448171	0.0448171	4.64544e-15	-2.00196	2.60061	1	0.0457302	0.00953097	1	1
Pkm	1.249e-16	0.118299	0.114957	0.0396219	0.044204	0.044204	3.1523e-15	2.67621	2.6006	1	0.00764568	0.00953122	1	1
Tada3	-1.73385e-16	-0.0565187	-0.115949	0.0399668	0.0445887	0.0445887	-4.33822e-15	-1.26756	-2.60041	1	0.20544	0.00953651	1	1
Srsf12	-1.09843e-15	-0.0814423	-0.115584	0.0398464	0.0444544	0.0444544	-2.75666e-14	-1.83204	-2.60007	1	0.0674317	0.00954585	1	1
Pthlh	-5.57086e-16	-0.0420886	-0.1161	0.0400252	0.0446539	0.0446539	-1.39184e-14	-0.942551	-2.59999	1	0.346283	0.00954815	1	1
Ank1	8.15138e-17	-0.111327	-0.115054	0.0396689	0.0442563	0.0442563	2.05486e-15	-2.51549	-2.59973	1	0.0121419	0.00955523	1	1
Gm16576	-3.36933e-16	0.00455857	-0.116451	0.0401568	0.0448007	0.0448007	-8.39044e-15	0.101752	-2.59931	1	0.918987	0.00956663	1	1
Gm6768	-1.36122e-16	-0.045373	-0.116016	0.040013	0.0446402	0.0446402	-3.40196e-15	-1.01641	-2.59891	1	0.309834	0.00957788	1	1
D930048G16Rik	-6.84544e-17	-0.111752	-0.115004	0.0396664	0.0442535	0.0442535	-1.72575e-15	-2.52528	-2.59875	1	0.0118126	0.00958231	1	1
Col8a1	8.66021e-16	0.057993	-0.116521	0.0402004	0.0448494	0.0448494	2.15426e-14	1.29306	-2.59805	1	0.196478	0.00960163	1	1
Cflar	-8.86156e-17	-0.0111008	0.116411	0.0401686	0.0448139	0.0448139	-2.20609e-15	-0.247709	2.59765	1	0.804442	0.00961266	1	1
Fgd5	1.6386e-16	-0.0282905	-0.116112	0.0400739	0.0447082	0.0447082	4.08894e-15	-0.632782	-2.59711	1	0.527113	0.00962755	1	1
Cpn2	-4.90372e-15	-0.0602309	-0.115722	0.0399515	0.0445716	0.0445716	-1.22742e-13	-1.35133	-2.59631	1	0.177091	0.0096499	1	1
Mrpl2	-9.4965e-16	-0.229106	0.114575	0.0395561	0.0441305	0.0441305	-2.40077e-14	-5.19156	2.59627	1	2.84341e-07	0.00965101	1	0.00834796
Pced1a	-1.33079e-16	-0.0643705	-0.115633	0.0399328	0.0445508	0.0445508	-3.33258e-15	-1.44488	-2.59552	1	0.149005	0.00967171	1	1
Nipsnap1	2.38613e-16	-0.108202	0.116145	0.0401369	0.0447785	0.0447785	5.94498e-15	-2.41638	2.59376	1	0.0159677	0.00972092	1	1
Mir27b	-1.68916e-16	-0.0227435	0.11627	0.0401856	0.0448328	0.0448328	-4.20341e-15	-0.507295	2.59341	1	0.612131	0.00973067	1	1
Nktr	-2.36932e-17	-0.119444	-0.114607	0.0396163	0.0441977	0.0441977	-5.98066e-16	-2.7025	-2.59305	1	0.00707335	0.00974067	1	1
Lrp11	1.28335e-16	-0.172553	0.115419	0.0399041	0.0445188	0.0445188	3.21608e-15	-3.87597	2.5926	1	0.000117692	0.00975329	1	1
Gm13127	-3.08606e-16	0.0330895	0.115866	0.0400591	0.0446917	0.0446917	-7.70375e-15	0.740393	2.59257	1	0.459346	0.00975427	1	1
Dusp10	-2.43763e-17	-0.011629	-0.116036	0.0401226	0.0447626	0.0447626	-6.07544e-16	-0.259792	-2.59225	1	0.795112	0.00976317	1	1
Bscl2	-2.34033e-16	-0.256298	-0.110715	0.0382839	0.0427112	0.0427112	-6.11309e-15	-6.00073	-2.59218	1	3.36704e-09	0.00976517	1	9.96273e-05
Gm6313	-6.52882e-17	-0.202106	-0.112502	0.0389068	0.0434061	0.0434061	-1.67807e-15	-4.65617	-2.59185	1	3.95457e-06	0.0097744	1	0.1149
Gm24999	-7.2076e-17	0.0316006	-0.116207	0.0401945	0.0448428	0.0448428	-1.79318e-15	0.704697	-2.59143	1	0.481267	0.00978609	1	1
Itpa-ps2	-5.57633e-17	-0.024945	0.11618	0.0401884	0.044836	0.044836	-1.38755e-15	-0.556362	2.59123	1	0.578167	0.00979181	1	1
Gm12584	-5.23932e-16	0.0230413	-0.116145	0.0401864	0.0448338	0.0448338	-1.30375e-14	0.513926	-2.59057	1	0.607489	0.00981027	1	1
Lrat	5.37599e-18	-0.0057052	-0.116003	0.0401372	0.0447789	0.0447789	1.3394e-16	-0.127408	-2.59057	1	0.898659	0.00981036	1	1
Aqp1	-3.219e-16	-0.0593904	0.11618	0.0402013	0.0448503	0.0448503	-8.0072e-15	-1.32419	2.59039	1	0.185934	0.00981553	1	1
Gramd1c	-1.62004e-16	-0.134543	0.115762	0.0400626	0.0446956	0.0446956	-4.04376e-15	-3.0102	2.59	1	0.00271842	0.00982637	1	1
C130071C03Rik	1.70442e-16	-0.100412	-0.114796	0.0397409	0.0443368	0.0443368	4.28884e-15	-2.26476	-2.58918	1	0.023877	0.0098497	1	1
Clvs1	4.83127e-16	-0.0969565	-0.114819	0.039762	0.0443603	0.0443603	1.21505e-14	-2.18566	-2.58832	1	0.0292193	0.00987385	1	1
Iyd	2.47354e-16	-0.119994	0.115797	0.0401076	0.0447459	0.0447459	6.16726e-15	-2.68168	2.58788	1	0.00752326	0.00988645	1	1
Ppp1r3fos	-8.52918e-16	-0.0900112	0.11598	0.0401728	0.0448185	0.0448185	-2.12312e-14	-2.00835	2.58776	1	0.0450461	0.00988987	1	1
Osbpl2	-5.0277e-16	-0.128456	-0.114131	0.0395547	0.044129	0.044129	-1.27107e-14	-2.91091	-2.5863	1	0.00373506	0.00993147	1	1
Fbxo8	1.09761e-16	-0.10767	-0.114533	0.0396965	0.0442872	0.0442872	2.76502e-15	-2.43118	-2.58615	1	0.0153362	0.00993577	1	1
Fry	8.32514e-17	-0.237193	-0.111093	0.0385207	0.0429754	0.0429754	2.16121e-15	-5.51927	-2.58504	1	5.0354e-08	0.00996746	1	0.00148368
Hnf1b	-1.80276e-16	-0.0024664	-0.115776	0.0401456	0.0447882	0.0447882	-4.49054e-15	-0.055068	-2.58495	1	0.956102	0.00996981	1	1
Numa1	1.37505e-16	-0.139899	-0.113806	0.0394697	0.0440342	0.0440342	3.4838e-15	-3.17705	-2.5845	1	0.00156284	0.00998273	1	1
Pi15	-3.80027e-16	-0.0458514	-0.115377	0.0400146	0.0446421	0.0446421	-9.4972e-15	-1.02709	-2.58449	1	0.304785	0.00998317	1	1
Ppp3r1	-6.11901e-17	0.0454261	0.115358	0.0400164	0.0446441	0.0446441	-1.52913e-15	1.01752	2.58396	1	0.309311	0.0099984	1	1
Zfp874a	-8.35714e-17	0.000343456	-0.115685	0.040152	0.0447954	0.0447954	-2.08137e-15	0.00766723	-2.58252	1	0.993885	0.0100395	1	1
Gm13928	1.12084e-16	-0.0307966	0.115801	0.0401956	0.044844	0.044844	2.78847e-15	-0.686751	2.5823	1	0.4925	0.0100459	1	1
Dym	-3.73663e-16	-0.0768962	-0.114875	0.039875	0.0444863	0.0444863	-9.37086e-15	-1.72854	-2.58225	1	0.0843974	0.0100475	1	1
Wdr1	-3.89537e-16	0.146853	0.113535	0.039416	0.0439742	0.0439742	-9.88273e-15	3.33952	2.58186	1	0.000890311	0.0100587	1	1
Atl1	1.29182e-15	-0.232932	-0.111103	0.038572	0.0430326	0.0430326	3.34911e-14	-5.41293	-2.58184	1	8.91835e-08	0.0100593	1	0.00262521
Sstr3	-3.2888e-16	0.0493327	0.11522	0.0400015	0.0446274	0.0446274	-8.2217e-15	1.10543	2.58182	1	0.269406	0.0100598	1	1
Zfp451	4.34763e-17	-0.199136	-0.112148	0.038941	0.0434443	0.0434443	1.11647e-15	-4.58372	-2.58143	1	5.54124e-06	0.010071	1	0.160768
Gm23956	5.03068e-17	0.0105193	-0.115667	0.040171	0.0448166	0.0448166	1.25232e-15	0.234719	-2.5809	1	0.814506	0.0100862	1	1
L3mbtl2	-6.57663e-16	-0.10806	0.115561	0.0401389	0.0447807	0.0447807	-1.63847e-14	-2.4131	2.58059	1	0.0161109	0.0100952	1	1
Pqlc1	6.63891e-16	0.0480451	0.115178	0.040007	0.0446335	0.0446335	1.65944e-14	1.07643	2.58052	1	0.282158	0.0100973	1	1
Cul4a	1.88424e-16	-0.196708	-0.112167	0.038966	0.0434722	0.0434722	4.83561e-15	-4.52492	-2.58021	1	7.26231e-06	0.0101063	1	0.210447
Hacl1	5.49881e-17	-0.00649224	-0.115533	0.0401377	0.0447794	0.0447794	1.36999e-15	-0.144983	-2.58005	1	0.884772	0.010111	1	1
Rasl11b	-3.40569e-16	0.211994	0.111701	0.0388069	0.0432947	0.0432947	-8.77598e-15	4.89652	2.58	1	1.25026e-06	0.0101123	1	0.0365114
Lrrfip1	2.42229e-16	-0.132658	-0.113759	0.039526	0.0440969	0.0440969	6.12834e-15	-3.00833	-2.57975	1	0.00273501	0.0101196	1	1
Zfp14	3.71823e-16	-0.158034	0.115036	0.0399727	0.0445953	0.0445953	9.30192e-15	-3.54374	2.57956	1	0.000424622	0.0101252	1	1
Sstr4	-1.70904e-15	0.0542507	-0.115693	0.0402042	0.0448536	0.0448536	-4.25091e-14	1.20951	-2.57935	1	0.226936	0.0101311	1	1
Nr2f2	-1.46288e-16	-0.169329	-0.11281	0.0392271	0.0437635	0.0437635	-3.72925e-15	-3.86918	-2.57773	1	0.000120938	0.0101784	1	1
Rex2	-3.19755e-16	0.0244324	-0.115579	0.0401904	0.0448382	0.0448382	-7.95601e-15	0.544902	-2.57768	1	0.58602	0.0101797	1	1
Gm14798	-2.59411e-16	0.0618248	-0.115595	0.0402024	0.0448516	0.0448516	-6.45262e-15	1.37843	-2.57727	1	0.168575	0.0101917	1	1
BC106179	2.27524e-16	-0.0928061	0.115468	0.0401698	0.0448152	0.0448152	5.66406e-15	-2.07086	2.57654	1	0.0387909	0.010213	1	1
U2surp	-2.38396e-16	0.0178068	-0.115498	0.0401827	0.0448296	0.0448296	-5.93281e-15	0.39721	-2.57638	1	0.691352	0.0102178	1	1
Gm3428	-3.19712e-16	-0.00421628	-0.115351	0.0401438	0.0447862	0.0447862	-7.96418e-15	-0.0941425	-2.57559	1	0.925027	0.0102407	1	1
Fam120b	1.64548e-16	-0.110948	-0.114008	0.0396784	0.044267	0.044267	4.14704e-15	-2.50634	-2.57546	1	0.0124575	0.0102445	1	1
Fstl4	-9.5463e-16	0.132493	0.113558	0.0395286	0.0440999	0.0440999	-2.41503e-14	3.00438	2.57501	1	0.00277021	0.0102578	1	1
Rasa3	-4.63056e-16	0.153156	0.113078	0.0393671	0.0439196	0.0439196	-1.17625e-14	3.48718	2.57466	1	0.00052318	0.010268	1	1
Rspo3	-7.64506e-17	-0.065836	-0.114698	0.0399313	0.0445492	0.0445492	-1.91455e-15	-1.47783	-2.57463	1	0.139969	0.0102689	1	1
Tspan2	-3.48552e-16	-0.110584	-0.11394	0.0396813	0.0442702	0.0442702	-8.78379e-15	-2.49793	-2.57374	1	0.0127537	0.0102952	1	1
Gm23441	-2.21101e-16	-0.0144657	-0.115185	0.0401194	0.044759	0.044759	-5.51107e-15	-0.323191	-2.57346	1	0.746661	0.0103034	1	1
Smurf1	3.2709e-16	0.00640836	-0.115209	0.040166	0.0448109	0.0448109	8.14345e-15	0.143009	-2.57101	1	0.88633	0.0103757	1	1
Ap1s3	6.58896e-17	-0.026539	-0.114957	0.0400855	0.0447211	0.0447211	1.64373e-15	-0.593434	-2.57052	1	0.55311	0.0103903	1	1
RLTR34_MM	-2.45874e-16	0.0351076	-0.115282	0.0402009	0.0448499	0.0448499	-6.11613e-15	0.782781	-2.5704	1	0.434059	0.010394	1	1
Sgcz	5.61632e-16	-0.112772	-0.11375	0.039668	0.0442554	0.0442554	1.41583e-14	-2.54821	-2.57031	1	0.0110712	0.0103966	1	1
Steap2	1.94602e-16	-0.0561429	-0.114522	0.0399766	0.0445997	0.0445997	4.8679e-15	-1.25882	-2.56779	1	0.208576	0.0104717	1	1
Adamts7	5.84983e-17	-0.0484129	0.115151	0.0402063	0.044856	0.044856	1.45495e-15	-1.0793	2.56714	1	0.280881	0.010491	1	1
Tmem72	9.16202e-17	0.114111	-0.114917	0.0401258	0.0447661	0.0447661	2.28333e-15	2.54904	-2.56705	1	0.0110452	0.0104938	1	1
Zfp26	1.40864e-17	0.0125067	-0.114965	0.0401774	0.0448236	0.0448236	3.50604e-16	0.27902	-2.56484	1	0.780324	0.0105601	1	1
Camsap3	-8.63177e-17	-0.0621538	-0.114275	0.0399511	0.0445712	0.0445712	-2.16058e-15	-1.39448	-2.56388	1	0.163678	0.0105889	1	1
Gm6712	1.80147e-16	-0.102146	-0.11366	0.0397375	0.044333	0.044333	4.53342e-15	-2.30406	-2.56379	1	0.021554	0.0105918	1	1
Gm10660	5.07798e-17	-0.288094	-0.108306	0.0378702	0.0422497	0.0422497	1.34089e-15	-6.81885	-2.56348	1	2.20906e-11	0.0106012	1	6.5649e-07
Gm3043	2.47096e-16	-0.0140196	-0.114737	0.0401228	0.0447628	0.0447628	6.15848e-15	-0.313198	-2.56322	1	0.754237	0.010609	1	1
Gga2	2.63659e-18	-0.0435233	-0.114462	0.0400287	0.0446578	0.0446578	6.58675e-17	-0.974595	-2.56308	1	0.330147	0.0106131	1	1
Gm13977	-5.42403e-17	-0.0889872	-0.113851	0.0398152	0.0444195	0.0444195	-1.3623e-15	-2.00333	-2.56308	1	0.0455825	0.0106132	1	1
Wdr19	5.42586e-16	-0.116516	-0.113357	0.0396452	0.04423	0.04423	1.3686e-14	-2.63431	-2.5629	1	0.0086444	0.0106185	1	1
Sesn3	2.564e-16	-0.0172678	-0.114671	0.0401144	0.0447534	0.0447534	6.39172e-15	-0.385844	-2.56229	1	0.699747	0.0106371	1	1
Glt1d1	4.09315e-15	-0.123712	-0.11318	0.0395959	0.044175	0.044175	1.03373e-13	-2.8005	-2.5621	1	0.00526367	0.0106429	1	1
Pcdh15	-1.8108e-16	-0.156401	-0.11237	0.0393448	0.0438948	0.0438948	-4.60238e-15	-3.56309	-2.55997	1	0.000395091	0.0107075	1	1
Gm7071	6.19088e-17	-0.104358	0.114652	0.0401497	0.0447928	0.0447928	1.54195e-15	-2.3298	2.5596	1	0.0201413	0.0107187	1	1
B4	1.36465e-16	-0.210302	0.113287	0.0396883	0.044278	0.044278	3.43842e-15	-4.74957	2.55853	1	2.54285e-06	0.0107516	1	0.0740275
Wdr44	-1.13303e-17	-0.0575755	-0.113979	0.0399734	0.0445961	0.0445961	-2.83445e-16	-1.29104	-2.55581	1	0.197177	0.0108349	1	1
1700066B19Rik	1.35625e-16	-0.00551589	-0.114459	0.0401451	0.0447876	0.0447876	3.37838e-15	-0.123157	-2.5556	1	0.902024	0.0108414	1	1
Gm23202	1.50923e-16	0.00624745	0.114444	0.0401435	0.0447858	0.0447858	3.75959e-15	0.139496	2.55536	1	0.889104	0.0108489	1	1
Ankhd1	-6.52653e-17	-0.0244295	-0.114278	0.0400955	0.0447323	0.0447323	-1.62775e-15	-0.546127	-2.55471	1	0.585178	0.0108688	1	1
Gm12700	3.81185e-16	0.0181621	0.114327	0.0401136	0.0447525	0.0447525	9.50263e-15	0.405834	2.55465	1	0.685007	0.0108707	1	1
Gm15232	-1.41893e-15	-0.0224096	-0.114285	0.0401016	0.0447391	0.0447391	-3.53834e-14	-0.500895	-2.55448	1	0.616625	0.010876	1	1
E130311K13Rik	-1.94827e-17	-0.0279651	-0.11423	0.0400847	0.0447203	0.0447203	-4.86038e-16	-0.625333	-2.55433	1	0.531986	0.0108807	1	1
Sez6l2	-2.12787e-16	-0.0418645	-0.114066	0.0400372	0.0446673	0.0446673	-5.31472e-15	-0.937254	-2.55368	1	0.348998	0.0109007	1	1
Rfng	-3.50814e-17	-0.100178	0.114327	0.0401594	0.0448036	0.0448036	-8.73554e-16	-2.23594	2.55173	1	0.0257162	0.0109611	1	1
Mars	1.8368e-16	-0.204992	0.113037	0.039723	0.0443167	0.0443167	4.62402e-15	-4.62561	2.55066	1	4.56176e-06	0.0109947	1	0.132423
Gm14613	-8.00493e-17	-0.00127633	0.114264	0.0401606	0.0448049	0.0448049	-1.99323e-15	-0.0284864	2.55025	1	0.977283	0.0110074	1	1
1700110I01Rik	-3.13525e-16	-0.195086	-0.110862	0.0389935	0.0435029	0.0435029	-8.04043e-15	-4.48444	-2.54838	1	8.73325e-06	0.011066	1	0.252819
Gm14420	-1.18683e-16	-0.0566116	0.1143	0.0402089	0.0448588	0.0448588	-2.95166e-15	-1.26199	2.548	1	0.207432	0.011078	1	1
Unc79	7.86008e-17	-0.139211	-0.112245	0.0394864	0.0440528	0.0440528	1.99058e-15	-3.16009	-2.54796	1	0.00165518	0.0110792	1	1
2810454H06Rik	-1.76033e-16	-0.101037	0.114115	0.0401583	0.0448023	0.0448023	-4.38347e-15	-2.25516	2.54708	1	0.0244762	0.0111067	1	1
Gm26264	2.68956e-15	-0.0365103	0.114241	0.0402059	0.0448555	0.0448555	6.68947e-14	-0.813955	2.54687	1	0.415988	0.0111134	1	1
Gm15190	-2.35292e-16	-0.0574275	-0.113545	0.0399765	0.0445996	0.0445996	-5.88576e-15	-1.28762	-2.54588	1	0.198365	0.0111448	1	1
Rgag4	3.32801e-16	-0.00929143	-0.113946	0.0401386	0.0447804	0.0447804	8.29128e-15	-0.207489	-2.54454	1	0.835697	0.0111869	1	1
Gm11738	3.59493e-17	0.00403379	-0.114017	0.040167	0.0448121	0.0448121	8.94995e-16	0.0900156	-2.54434	1	0.928304	0.0111933	1	1
Btbd18	-7.2702e-16	-0.0256536	0.114091	0.040198	0.0448466	0.0448466	-1.8086e-14	-0.572029	2.54403	1	0.567513	0.0112032	1	1
Fbxo28	3.63759e-16	-0.0200128	-0.113839	0.0401108	0.0447494	0.0447494	9.06887e-15	-0.44722	-2.54392	1	0.654875	0.0112068	1	1
D1Pas1	-1.17433e-16	-0.0175997	-0.113837	0.0401176	0.044757	0.044757	-2.92722e-15	-0.393229	-2.54345	1	0.694288	0.0112215	1	1
Parp11	-2.50601e-17	-0.0397916	-0.113593	0.0400474	0.0446787	0.0446787	-6.25761e-16	-0.890616	-2.54245	1	0.373486	0.0112535	1	1
4933413C19Rik	-1.42865e-16	0.0958596	-0.113935	0.0401689	0.0448142	0.0448142	-3.55661e-15	2.13905	-2.54239	1	0.0328277	0.0112554	1	1
Cecr5	-3.01854e-17	-0.0860864	-0.112988	0.0398369	0.0444438	0.0444438	-7.57724e-16	-1.93697	-2.54225	1	0.0532096	0.0112597	1	1
Cd3e	2.32579e-17	-0.0687153	-0.113221	0.0399262	0.0445434	0.0445434	5.82522e-16	-1.54266	-2.54181	1	0.123431	0.0112738	1	1
1110051M20Rik	6.4768e-16	-0.139944	0.113562	0.0400484	0.0446797	0.0446797	1.61724e-14	-3.13215	2.5417	1	0.00181831	0.0112775	1	1
Tspan31	-2.24664e-16	0.196693	0.110482	0.0389802	0.043488	0.043488	-5.76355e-15	4.52292	2.54051	1	7.32913e-06	0.0113153	1	0.212376
Gm11168	-7.00986e-17	-0.0388668	-0.113512	0.0400512	0.0446829	0.0446829	-1.75022e-15	-0.869835	-2.5404	1	0.384732	0.011319	1	1
Cep170	7.86905e-18	-0.158421	-0.11146	0.0393343	0.0438831	0.0438831	2.00056e-16	-3.61007	-2.53994	1	0.000331217	0.0113337	1	1
Slc30a5	2.04606e-16	0.00493852	-0.113827	0.0401696	0.044815	0.044815	5.09355e-15	0.110198	-2.53993	1	0.912289	0.0113341	1	1
Slc15a5	1.95842e-16	0.0738191	-0.113907	0.0401999	0.0448488	0.0448488	4.87171e-15	1.64596	-2.53979	1	0.100287	0.0113384	1	1
Gm27505	-2.28146e-16	0.0965872	0.112677	0.039778	0.0443781	0.0443781	-5.73549e-15	2.17646	2.53903	1	0.0299031	0.011363	1	1
4930526F13Rik	2.21799e-16	-0.00866463	-0.113686	0.0401414	0.0447835	0.0447835	5.52544e-15	-0.193478	-2.53858	1	0.846649	0.0113775	1	1
Gm11342	2.05998e-16	-0.0519278	-0.113275	0.0400016	0.0446276	0.0446276	5.14973e-15	-1.16358	-2.53824	1	0.245048	0.0113884	1	1
Dmtn	-8.66382e-18	0.281324	0.107468	0.0379756	0.0423673	0.0423673	-2.28142e-16	6.64012	2.53659	1	6.93109e-11	0.0114416	1	2.05867e-06
Gm9930	-1.47119e-16	0.0112154	-0.113702	0.0401809	0.0448276	0.0448276	-3.6614e-15	0.250189	-2.53643	1	0.802525	0.0114468	1	1
Gm15983	6.62614e-17	-0.0295145	-0.113425	0.0400839	0.0447193	0.0447193	1.65307e-15	-0.659995	-2.53638	1	0.509506	0.0114485	1	1
Gm6139	-1.31068e-16	0.0939511	-0.113622	0.0401733	0.0448191	0.0448191	-3.26256e-15	2.09623	-2.53513	1	0.0364725	0.0114887	1	1
2610306M01Rik	-1.61159e-16	-0.0252638	-0.113396	0.0400974	0.0447345	0.0447345	-4.01917e-15	-0.564751	-2.53488	1	0.57245	0.0114971	1	1
Galnt14	1.11633e-15	0.095236	0.112513	0.0397871	0.0443883	0.0443883	2.80576e-14	2.14552	2.53475	1	0.0323047	0.0115013	1	1
Chrm3	-1.55561e-15	-0.110714	-0.11224	0.0396918	0.0442819	0.0442819	-3.91922e-14	-2.5002	-2.53467	1	0.0126732	0.0115039	1	1
Gm12258	2.60373e-16	-0.107596	-0.112281	0.0397119	0.0443043	0.0443043	6.55654e-15	-2.42857	-2.53432	1	0.015446	0.0115152	1	1
Gm7102	4.44e-16	-0.0506662	-0.113104	0.0400078	0.0446345	0.0446345	1.10978e-14	-1.13514	-2.534	1	0.256764	0.0115256	1	1
Klk8	5.94027e-15	-0.127849	0.113337	0.0400902	0.0447264	0.0447264	1.48173e-13	-2.85848	2.534	1	0.00440191	0.0115256	1	1
Gm5913	-7.34625e-16	0.0646601	0.112899	0.0399474	0.0445671	0.0445671	-1.83898e-14	1.45085	2.53325	1	0.147335	0.0115501	1	1
5430403G16Rik	9.4332e-17	-0.178989	-0.110649	0.0391541	0.043682	0.043682	2.40925e-15	-4.09754	-2.53306	1	4.73892e-05	0.0115562	1	1
Cep97	-1.07189e-16	-0.135179	-0.111686	0.0395216	0.044092	0.044092	-2.71216e-15	-3.06584	-2.53301	1	0.00226643	0.0115578	1	1
Utp18	4.95833e-16	0.0544971	0.113002	0.0399923	0.0446172	0.0446172	1.23982e-14	1.22144	2.53269	1	0.222392	0.0115683	1	1
Gm4450	3.03796e-17	-0.138437	-0.11159	0.0394972	0.0440648	0.0440648	7.69159e-16	-3.14167	-2.5324	1	0.00176111	0.0115777	1	1
Kank4os	-1.98589e-17	-0.0338829	-0.113192	0.0400705	0.0447044	0.0447044	-4.95598e-16	-0.757931	-2.532	1	0.448784	0.0115909	1	1
Cela3b	-2.90869e-17	0.0159943	-0.113514	0.0401889	0.0448365	0.0448365	-7.23756e-16	0.356725	-2.53174	1	0.72142	0.0115994	1	1
Nudt11	1.41417e-16	-0.0256551	-0.113247	0.040097	0.044734	0.044734	3.52688e-15	-0.573505	-2.53156	1	0.566514	0.0116053	1	1
Nyap2	-1.06653e-15	-0.145305	-0.11138	0.0394443	0.0440058	0.0440058	-2.7039e-14	-3.30195	-2.53102	1	0.00101614	0.0116229	1	1
Usp2	-1.79034e-16	0.257208	0.108135	0.0382966	0.0427253	0.0427253	-4.67494e-15	6.02005	2.53094	1	3.00874e-09	0.0116256	1	8.90496e-05
Gm24616	2.37388e-16	-0.145651	-0.11136	0.0394417	0.0440029	0.0440029	6.01872e-15	-3.31003	-2.53075	1	0.000987767	0.0116318	1	1
Coro1a	1.1874e-17	0.0383947	0.113061	0.0400554	0.0446875	0.0446875	2.9644e-16	0.859181	2.53004	1	0.390578	0.0116552	1	1
9330154J02Rik	-8.2429e-17	-0.0221725	-0.113204	0.0401077	0.0447459	0.0447459	-2.05519e-15	-0.49552	-2.52994	1	0.620412	0.0116585	1	1
Emd	-2.24588e-16	0.183015	-0.112487	0.0398537	0.0444626	0.0444626	-5.63531e-15	4.11615	-2.52993	1	4.38172e-05	0.0116586	1	1
Smoc2	1.12857e-15	0.0345612	0.113089	0.0400687	0.0447024	0.0447024	2.81659e-14	0.77314	2.52981	1	0.439739	0.0116627	1	1
Oaz1	-1.28392e-17	0.139702	0.111438	0.0394884	0.044055	0.044055	-3.25138e-16	3.17107	2.52953	1	0.00159482	0.0116719	1	1
Rasd2	8.90564e-17	-0.0306748	-0.113107	0.0400817	0.0447169	0.0447169	2.22187e-15	-0.685976	-2.52941	1	0.492988	0.0116758	1	1
Gm23086	2.51642e-16	-0.067796	-0.112673	0.0399338	0.0445519	0.0445519	6.30147e-15	-1.52173	-2.52903	1	0.128594	0.0116882	1	1
Col18a1	-7.23289e-17	-0.137171	0.11301	0.0400596	0.0446922	0.0446922	-1.80554e-15	-3.06923	2.52862	1	0.00224123	0.0117018	1	1
2500002B13Rik	1.40129e-16	-0.0695377	-0.112576	0.039926	0.0445432	0.0445432	3.50971e-15	-1.56113	-2.52736	1	0.119011	0.0117435	1	1
L1_Rod_orf2	2.53441e-16	0.0643614	-0.113368	0.040209	0.0448589	0.0448589	6.3031e-15	1.43475	-2.52721	1	0.151869	0.0117486	1	1
AU040320	5.56341e-17	-0.0723054	0.113327	0.0402032	0.0448525	0.0448525	1.38382e-15	-1.61207	2.52666	1	0.107463	0.0117668	1	1
Rpp40	3.22272e-17	-0.0194437	-0.113081	0.0401162	0.0447554	0.0447554	8.03346e-16	-0.434443	-2.52664	1	0.66412	0.0117671	1	1
Gm14317	-3.11716e-16	-0.105452	0.113124	0.0401515	0.0447948	0.0447948	-7.76351e-15	-2.35412	2.52539	1	0.0188824	0.0118089	1	1
Mdh2	-1.40548e-16	-0.010355	0.1132	0.0401818	0.0448286	0.0448286	-3.49779e-15	-0.230991	2.52517	1	0.817399	0.0118161	1	1
Mir384	-4.91175e-16	-0.0589012	-0.112606	0.0399754	0.0445983	0.0445983	-1.22869e-14	-1.32071	-2.52491	1	0.187094	0.0118249	1	1
Snord73a	-6.12115e-18	-0.0186166	0.113174	0.0401938	0.044842	0.044842	-1.52291e-16	-0.41516	2.52383	1	0.678171	0.0118606	1	1
Gm26753	-9.66161e-18	-0.127006	-0.111392	0.0395845	0.0441622	0.0441622	-2.44076e-16	-2.87591	-2.52233	1	0.00416911	0.0119108	1	1
Gm17033	-1.68728e-16	-0.0277455	-0.112749	0.040093	0.0447295	0.0447295	-4.2084e-15	-0.620294	-2.52069	1	0.535295	0.0119661	1	1
Gm13248	3.21702e-17	-0.0108429	-0.112856	0.0401401	0.044782	0.044782	8.01449e-16	-0.242126	-2.52011	1	0.808764	0.0119854	1	1
Ssxb5	5.95213e-16	-0.100174	0.112921	0.0401634	0.0448081	0.0448081	1.48198e-14	-2.23562	2.5201	1	0.025737	0.0119858	1	1
Zcchc6	-7.60021e-17	-0.0166357	-0.112786	0.0401254	0.0447657	0.0447657	-1.89411e-15	-0.371618	-2.51948	1	0.710306	0.0120069	1	1
Skida1	-1.9746e-18	-0.190639	0.111893	0.0398115	0.0444155	0.0444155	-4.95986e-17	-4.29216	2.51924	1	2.05721e-05	0.0120149	1	0.591942
Rock2	8.19205e-16	0.019285	-0.112935	0.0401957	0.0448441	0.0448441	2.03804e-14	0.430045	-2.5184	1	0.667315	0.0120433	1	1
Gm20687	3.42399e-16	-0.0593689	-0.112294	0.0399751	0.0445979	0.0445979	8.56532e-15	-1.3312	-2.51791	1	0.183619	0.0120597	1	1
Fstl5	1.40804e-15	-0.165694	-0.110337	0.039279	0.0438214	0.0438214	3.58471e-14	-3.78112	-2.51789	1	0.000171454	0.0120606	1	1
B4A	-8.33386e-17	-0.22969	0.111106	0.0395534	0.0441275	0.0441275	-2.10699e-15	-5.20514	2.51783	1	2.65127e-07	0.0120624	1	0.00778545
E2f6	9.68502e-17	-0.0341228	-0.112557	0.040073	0.0447072	0.0447072	2.41684e-15	-0.763251	-2.51766	1	0.445608	0.0120685	1	1
Best3	2.84136e-16	-0.0562328	0.112942	0.0402139	0.0448644	0.0448644	7.06561e-15	-1.25339	2.51741	1	0.210541	0.0120766	1	1
Gm6651	2.71743e-16	-0.0683049	0.112899	0.040208	0.0448578	0.0448578	6.75844e-15	-1.5227	2.51682	1	0.128351	0.0120968	1	1
Lemd2	-1.54185e-16	-0.0173502	-0.112658	0.0401241	0.0447642	0.0447642	-3.84271e-15	-0.38759	-2.5167	1	0.698455	0.0121008	1	1
Uggt2	-6.67414e-17	-0.274907	-0.106893	0.038071	0.0424737	0.0424737	-1.75308e-15	-6.4724	-2.51668	1	1.98101e-10	0.0121016	1	5.87982e-06
Rprd2	-7.05697e-17	-0.18153	-0.109882	0.0391359	0.0436617	0.0436617	-1.8032e-15	-4.15764	-2.51666	1	3.67545e-05	0.0121024	1	1
Lnp	2.35219e-16	-0.185489	-0.109744	0.0390986	0.0436201	0.0436201	6.01604e-15	-4.25238	-2.51591	1	2.44644e-05	0.0121277	1	0.702961
D130017N08Rik	-3.54209e-16	-0.112249	-0.111377	0.0396873	0.0442769	0.0442769	-8.92499e-15	-2.53516	-2.51546	1	0.0114878	0.012143	1	1
Zeb2	-1.75366e-16	-0.239181	-0.108111	0.0385238	0.0429788	0.0429788	-4.55215e-15	-5.56508	-2.51544	1	3.92499e-08	0.0121438	1	0.00115705
P4ha2	2.87786e-17	-0.136061	-0.11088	0.0395205	0.0440908	0.0440908	7.28194e-16	-3.08592	-2.5148	1	0.00212103	0.0121655	1	1
Pusl1	1.24642e-16	-0.0958665	0.112661	0.0401726	0.0448183	0.0448183	3.10267e-15	-2.139	2.51373	1	0.0328311	0.0122022	1	1
Evi5	9.42603e-16	-0.167453	-0.110102	0.0392651	0.0438058	0.0438058	2.40061e-14	-3.82261	-2.51342	1	0.000145577	0.012213	1	1
Gm13016	-1.08544e-15	-0.061746	0.112742	0.0402126	0.0448629	0.0448629	-2.69925e-14	-1.37633	2.51303	1	0.169225	0.0122262	1	1
Hmgcll1	1.17162e-15	-0.0887072	-0.111659	0.0398304	0.0444366	0.0444366	2.94152e-14	-1.99626	-2.51276	1	0.0463485	0.0122354	1	1
Ahcyl2	-6.7942e-17	-0.0469438	0.112688	0.0402155	0.0448662	0.0448662	-1.68945e-15	-1.04631	2.51166	1	0.295833	0.0122734	1	1
Gm14258	-7.6448e-17	-0.030973	-0.112297	0.0400849	0.0447205	0.0447205	-1.90715e-15	-0.69259	-2.51109	1	0.48883	0.0122928	1	1
Dach1	-2.88698e-16	0.0732396	-0.112581	0.0402048	0.0448543	0.0448543	-7.18069e-15	1.63284	-2.50994	1	0.103019	0.0123326	1	1
Nap1l1	-3.6268e-17	0.00218659	-0.112477	0.0401705	0.044816	0.044816	-9.02851e-16	0.0487903	-2.50974	1	0.961102	0.0123395	1	1
Trp63	3.93726e-17	0.0943206	-0.112432	0.0401761	0.0448222	0.0448222	9.80001e-16	2.10433	-2.5084	1	0.0357579	0.012386	1	1
Pgam2	3.13868e-16	0.0243546	-0.112496	0.0402033	0.0448526	0.0448526	7.80702e-15	0.542992	-2.50813	1	0.587334	0.0123953	1	1
Tmem74	1.67458e-16	-0.113507	0.112283	0.0401341	0.0447754	0.0447754	4.17247e-15	-2.53504	2.5077	1	0.0114917	0.01241	1	1
Mir713	1.67356e-16	-0.0375856	-0.112085	0.0400634	0.0446965	0.0446965	4.17729e-15	-0.840906	-2.5077	1	0.400729	0.0124101	1	1
Gramd1a	-1.96525e-17	-0.14225	0.11201	0.040043	0.0446737	0.0446737	-4.90786e-16	-3.18419	2.50729	1	0.00152542	0.0124244	1	1
Fam217b	-3.99267e-16	-0.0787009	-0.111567	0.0398855	0.0444981	0.0444981	-1.00103e-14	-1.76864	-2.50723	1	0.0774534	0.0124266	1	1
Mir466q	-2.85235e-16	0.110021	-0.112267	0.040143	0.0447853	0.0447853	-7.10547e-15	2.45663	-2.50678	1	0.0143016	0.0124422	1	1
Efnb3	1.29162e-16	-0.0776918	-0.11154	0.039891	0.0445041	0.0445041	3.23787e-15	-1.74572	-2.50627	1	0.0813621	0.0124598	1	1
Pip5k1a	-2.27835e-16	0.110391	0.111009	0.039702	0.0442933	0.0442933	-5.73862e-15	2.49228	2.50623	1	0.0129566	0.0124615	1	1
B230354K17Rik	-1.78196e-16	-0.148684	-0.110212	0.0394254	0.0439847	0.0439847	-4.51983e-15	-3.38035	-2.50568	1	0.000770092	0.0124804	1	1
Acsm2	-1.56106e-16	0.174567	0.109572	0.0392041	0.0437378	0.0437378	-3.98189e-15	3.99122	2.50519	1	7.37197e-05	0.0124977	1	1
Dhx57	-1.252e-17	-0.132204	-0.110543	0.0395521	0.044126	0.044126	-3.16544e-16	-2.99606	-2.50517	1	0.00284579	0.0124985	1	1
Phb2	-3.17167e-16	-0.0533765	0.11237	0.0402165	0.0448673	0.0448673	-7.88649e-15	-1.18965	2.50449	1	0.234646	0.0125222	1	1
Trim6	2.7428e-17	0.126892	0.110605	0.0395908	0.0441692	0.0441692	6.92789e-16	2.87286	2.50411	1	0.00420903	0.0125353	1	1
Gm13022	1.76255e-16	0.103968	-0.112162	0.0401574	0.0448014	0.0448014	4.38911e-15	2.32064	-2.50354	1	0.0206348	0.0125554	1	1
Pcdhb9	7.22352e-17	-0.0661475	-0.111563	0.0399481	0.0445679	0.0445679	1.80823e-15	-1.4842	-2.50322	1	0.138273	0.0125668	1	1
Asb11	-5.30921e-16	0.359621	0.102656	0.0367715	0.0410239	0.0410239	-1.44384e-14	8.76613	2.50234	1	1.82569e-17	0.0125976	1	5.4475e-13
B230307C23Rik	4.48368e-16	-0.305585	-0.105088	0.0376429	0.0419961	0.0419961	1.19111e-14	-7.27651	-2.50234	1	1.05627e-12	0.0125978	1	3.14316e-08
3110021N24Rik	-3.60718e-16	-0.136696	-0.11032	0.0395196	0.0440898	0.0440898	-9.12756e-15	-3.1004	-2.50215	1	0.00202154	0.0126043	1	1
Zfand2b	1.50206e-15	-0.0212599	0.112197	0.0402012	0.0448502	0.0448502	3.73635e-14	-0.47402	2.5016	1	0.635655	0.0126238	1	1
Rapgef6	-1.50162e-16	0.223931	-0.11047	0.039596	0.044175	0.044175	-3.79236e-15	5.06917	-2.50074	1	5.30322e-07	0.0126543	1	0.0155358
Arsg	4.66458e-17	-0.00571451	-0.112033	0.0401561	0.0447999	0.0447999	1.16161e-15	-0.127556	-2.50073	1	0.898542	0.0126544	1	1
Gm26771	5.95158e-17	-0.0686413	-0.111393	0.0399372	0.0445557	0.0445557	1.49023e-15	-1.54057	-2.50008	1	0.123939	0.0126777	1	1
Gm26613	-1.90262e-16	0.0249447	-0.11213	0.0402054	0.0448549	0.0448549	-4.73225e-15	0.556119	-2.49984	1	0.578333	0.0126862	1	1
Zfp444	2.62409e-16	-0.141769	0.111682	0.0400455	0.0446765	0.0446765	6.55279e-15	-3.17324	2.49979	1	0.00158319	0.0126878	1	1
Sstr2	-1.47816e-16	0.445503	0.097825	0.0350873	0.039145	0.039145	-4.2128e-15	11.3808	2.49904	1	2.37432e-27	0.0127143	1	7.09756e-23
Gm13209	4.67162e-16	0.0758308	0.111157	0.0399029	0.0445174	0.0445174	1.17075e-14	1.7034	2.49694	1	0.0890023	0.012789	1	1
Mixl1	-1.93214e-15	-0.11213	0.111813	0.0401389	0.0447807	0.0447807	-4.81364e-14	-2.50399	2.4969	1	0.0125397	0.0127907	1	1
2810442N19Rik	2.61888e-18	-0.0205006	-0.111623	0.0401204	0.0447601	0.0447601	6.52755e-17	-0.45801	-2.49381	1	0.647108	0.0129013	1	1
Gm4535	3.8682e-17	-0.0627854	0.111859	0.0402151	0.0448657	0.0448657	9.61879e-16	-1.39941	2.49319	1	0.162198	0.0129236	1	1
Gm14524	-3.6449e-16	-0.0255918	-0.111536	0.0401058	0.0447438	0.0447438	-9.0882e-15	-0.571963	-2.49276	1	0.567558	0.012939	1	1
Brdt	3.311e-16	-0.0458794	-0.11133	0.0400366	0.0446666	0.0446666	8.26994e-15	-1.02715	-2.49247	1	0.304755	0.0129495	1	1
4932702P03Rik	-1.02401e-16	-0.102506	-0.110521	0.0397556	0.0443531	0.0443531	-2.57575e-15	-2.31114	-2.49185	1	0.021157	0.0129721	1	1
BC030499	-1.8882e-16	-0.173336	-0.109031	0.0392197	0.0437553	0.0437553	-4.81441e-15	-3.96148	-2.49183	1	8.32712e-05	0.0129728	1	1
Dusp15	3.79603e-16	-0.156129	-0.109443	0.039369	0.0439218	0.0439218	9.64218e-15	-3.5547	-2.49176	1	0.000407645	0.0129752	1	1
Fastk	-2.35265e-16	-0.157396	0.111135	0.0399824	0.0446062	0.0446062	-5.88421e-15	-3.52857	2.49147	1	0.000449188	0.0129857	1	1
Tpt1-ps3	-1.5616e-16	0.238216	0.107128	0.0385444	0.0430018	0.0430018	-4.05145e-15	5.53967	2.49125	1	4.50771e-08	0.0129938	1	0.00132838
Tbc1d23	1.22618e-16	-0.182482	-0.108762	0.0391356	0.0436614	0.0436614	3.13315e-15	-4.17949	-2.49104	1	3.34846e-05	0.0130011	1	0.959635
Gm26615	1.69429e-16	0.0863572	-0.111651	0.0401916	0.0448395	0.0448395	4.21553e-15	1.92592	-2.49001	1	0.0545783	0.0130387	1	1
Trem1	-1.98075e-16	0.00480376	-0.111609	0.0401793	0.0448258	0.0448258	-4.92978e-15	0.107165	-2.48985	1	0.914693	0.0130446	1	1
Cdc42se2	4.98925e-16	-0.188405	0.110605	0.0398258	0.0444315	0.0444315	1.25277e-14	-4.24034	2.48935	1	2.57738e-05	0.0130627	1	0.740326
Vangl1	-4.63067e-16	-0.0497911	-0.111113	0.0400223	0.0446506	0.0446506	-1.15702e-14	-1.11513	-2.48851	1	0.265235	0.0130932	1	1
Ccp110	6.47366e-16	-0.067416	-0.110887	0.039946	0.0445655	0.0445655	1.6206e-14	-1.51274	-2.48818	1	0.130863	0.0131051	1	1
Oas3	1.88831e-16	-0.000867735	-0.111467	0.0401691	0.0448144	0.0448144	4.70092e-15	-0.0193629	-2.4873	1	0.984558	0.0131375	1	1
BC003965	4.53748e-16	-0.137391	0.111152	0.0400627	0.0446957	0.0446957	1.1326e-14	-3.07393	2.48686	1	0.00220679	0.0131536	1	1
Fam57a	-1.18214e-16	-0.000366823	-0.111442	0.0401702	0.0448156	0.0448156	-2.94282e-15	-0.00818515	-2.48668	1	0.993472	0.0131599	1	1
Cntn3	-3.57035e-16	0.247326	0.106612	0.0384369	0.0428819	0.0428819	-9.28885e-15	5.7676	2.48617	1	1.27776e-08	0.0131786	1	0.000377375
Pramel5	-2.83808e-16	-0.0122757	0.111476	0.0401923	0.0448403	0.0448403	-7.06125e-15	-0.273765	2.48607	1	0.784358	0.0131822	1	1
Xpc	7.55952e-17	-0.0938329	-0.11041	0.0398087	0.0444123	0.0444123	1.89896e-15	-2.11277	-2.48603	1	0.0350257	0.013184	1	1
Gm26348	1.70371e-16	0.0420206	-0.11154	0.0402188	0.0448698	0.0448698	4.23612e-15	0.936501	-2.48585	1	0.349386	0.0131905	1	1
Gm26833	-2.35207e-16	-0.182737	0.110514	0.0398577	0.044467	0.044467	-5.90117e-15	-4.1095	2.4853	1	4.50644e-05	0.0132106	1	1
Fgf11	-3.06795e-16	-0.0638791	-0.110756	0.0399633	0.0445848	0.0445848	-7.67692e-15	-1.43275	-2.48417	1	0.15244	0.0132522	1	1
Angptl7	-3.49039e-17	-0.058722	-0.110797	0.0399863	0.0446105	0.0446105	-8.72895e-16	-1.31633	-2.48364	1	0.188558	0.0132716	1	1
Zfp493	8.72914e-17	-0.0833697	-0.110434	0.0398675	0.0444779	0.0444779	2.18954e-15	-1.87441	-2.4829	1	0.0613512	0.0132989	1	1
Cacna1a	5.2311e-17	-0.0249563	0.111376	0.0402085	0.0448584	0.0448584	1.30099e-15	-0.556334	2.48284	1	0.578186	0.0133012	1	1
Ptgdr	-4.02118e-16	-0.035002	-0.111012	0.040078	0.0447128	0.0447128	-1.00334e-14	-0.782819	-2.48279	1	0.434037	0.0133033	1	1
Stau2	-2.83869e-16	-0.106169	-0.110057	0.0397355	0.0443307	0.0443307	-7.14397e-15	-2.39493	-2.48263	1	0.0169237	0.0133092	1	1
Camk2d	-4.71207e-16	-0.17354	-0.108575	0.0392214	0.0437571	0.0437571	-1.2014e-14	-3.96599	-2.48132	1	8.17526e-05	0.0133576	1	1
Tfdp2	-8.72621e-17	-0.0530758	-0.110752	0.0400108	0.0446378	0.0446378	-2.18097e-15	-1.18903	-2.48113	1	0.234889	0.0133645	1	1
Hspe1-ps2	-4.11773e-17	-0.00331292	-0.111178	0.0401653	0.0448101	0.0448101	-1.0252e-15	-0.0739323	-2.48109	1	0.941088	0.013366	1	1
Neurod1	7.3657e-16	0.0893323	0.110264	0.0398355	0.0444422	0.0444422	1.84903e-14	2.01008	2.48107	1	0.0448621	0.0133669	1	1
Setbp1	-4.40359e-17	-0.0417644	-0.110868	0.0400546	0.0446867	0.0446867	-1.0994e-15	-0.934604	-2.48099	1	0.350362	0.0133696	1	1
Gm15536	1.23406e-16	0.00104461	-0.111197	0.0401741	0.04482	0.04482	3.07177e-15	0.0233069	-2.48097	1	0.981413	0.0133707	1	1
Mllt4	-2.66965e-16	-0.214904	-0.107416	0.0388116	0.0433	0.0433	-6.87849e-15	-4.96314	-2.48074	1	9.00708e-07	0.0133792	1	0.026334
MEN	-2.00243e-15	0.0823769	-0.111238	0.0401985	0.0448472	0.0448472	-4.98134e-14	1.83683	-2.48037	1	0.0667202	0.0133929	1	1
Ccdc184	2.47551e-16	0.00583358	-0.111195	0.040183	0.0448299	0.0448299	6.16059e-15	0.130127	-2.48037	1	0.896509	0.013393	1	1
Gm26790	-2.00656e-16	0.0268802	-0.11122	0.0402109	0.0448611	0.0448611	-4.99009e-15	0.599188	-2.4792	1	0.54927	0.0134363	1	1
Pax6	2.79234e-16	-0.0197329	-0.110974	0.0401257	0.044766	0.044766	6.95897e-15	-0.4408	-2.47898	1	0.659513	0.0134447	1	1
Gm16244	-2.82431e-16	-0.111124	-0.109704	0.0397058	0.0442975	0.0442975	-7.1131e-15	-2.50859	-2.47652	1	0.0123794	0.0135365	1	1
Entpd7	-1.02679e-16	0.128502	0.109371	0.0395875	0.0441656	0.0441656	-2.59373e-15	2.90956	2.47638	1	0.00375106	0.0135419	1	1
Ankrd10	-8.44411e-16	0.0422269	-0.111094	0.0402205	0.0448718	0.0448718	-2.09945e-14	0.941057	-2.47582	1	0.347047	0.013563	1	1
Far2os1	8.02996e-16	-0.0829036	-0.110129	0.0398718	0.0444828	0.0444828	2.01394e-14	-1.86372	-2.47577	1	0.0628401	0.0135649	1	1
Pcdhb8	3.20289e-16	0.0369543	-0.111048	0.0402187	0.0448697	0.0448697	7.9637e-15	0.82359	-2.4749	1	0.410494	0.0135976	1	1
Gm22632	1.39299e-16	-0.0361434	-0.110653	0.0400759	0.0447105	0.0447105	3.47588e-15	-0.808389	-2.47488	1	0.419181	0.0135985	1	1
Gm24926	1.39299e-16	-0.0361434	-0.110653	0.0400759	0.0447105	0.0447105	3.47588e-15	-0.808389	-2.47488	1	0.419181	0.0135985	1	1
Gm15675	9.21148e-17	-0.136776	-0.109137	0.0395273	0.0440984	0.0440984	2.33041e-15	-3.1016	-2.47485	1	0.00201352	0.0135996	1	1
Ssfa2	-1.44614e-15	0.0997531	0.109823	0.039777	0.044377	0.044377	-3.63563e-14	2.24786	2.47477	1	0.0249411	0.0136025	1	1
Ankrd1	-1.28602e-16	-0.0990925	0.110901	0.0401712	0.0448167	0.0448167	-3.20134e-15	-2.21106	2.47455	1	0.0274012	0.0136107	1	1
Ick	2.2339e-16	-0.189732	-0.107837	0.0390721	0.0435905	0.0435905	5.71738e-15	-4.35259	-2.47385	1	1.57703e-05	0.0136372	1	0.45483
Npw	1.33462e-16	-0.0917684	0.110885	0.0401851	0.0448322	0.0448322	3.32118e-15	-2.04693	2.47334	1	0.0410923	0.0136565	1	1
Ccdc43	-2.56966e-16	0.106229	-0.110797	0.0401559	0.0447997	0.0447997	-6.39922e-15	2.3712	-2.47316	1	0.0180395	0.0136633	1	1
Vmn2r55	1.20331e-16	-0.15757	-0.108586	0.0393631	0.0439152	0.0439152	3.05696e-15	-3.58806	-2.47263	1	0.000359836	0.0136832	1	1
Cdk9	7.50566e-16	-0.0268793	0.110923	0.0402121	0.0448624	0.0448624	1.86652e-14	-0.599148	2.47251	1	0.549296	0.013688	1	1
Zdhhc17	-2.91366e-16	-0.127192	-0.109217	0.0395981	0.0441774	0.0441774	-7.35807e-15	-2.87911	-2.47223	1	0.00412759	0.0136985	1	1
H2-Eb2	6.38789e-16	0.0418144	-0.110909	0.0402211	0.0448724	0.0448724	1.5882e-14	0.93185	-2.47165	1	0.351782	0.0137205	1	1
Rbm26	-1.16804e-16	-0.0829032	0.110821	0.0401991	0.0448479	0.0448479	-2.90563e-15	-1.84854	2.47105	1	0.0650066	0.0137433	1	1
Mepce	1.91289e-16	0.0234707	-0.11084	0.0402092	0.0448591	0.0448591	4.75735e-15	0.523208	-2.47085	1	0.601019	0.0137512	1	1
Gm24727	3.53538e-16	0.050699	-0.110875	0.0402222	0.0448737	0.0448737	8.78962e-15	1.12982	-2.47081	1	0.258997	0.0137523	1	1
2210013O21Rik	-1.04834e-15	-0.111785	-0.109403	0.0397034	0.0442949	0.0442949	-2.64044e-14	-2.52365	-2.46988	1	0.0118669	0.0137878	1	1
Gm17104	-2.15764e-16	-0.106231	0.110635	0.0401563	0.0448001	0.0448001	-5.3731e-15	-2.37122	2.46953	1	0.0180388	0.0138014	1	1
Gm11985	5.83235e-17	0.0382418	0.110376	0.04007	0.0447038	0.0447038	1.45554e-15	0.855448	2.46906	1	0.392638	0.0138192	1	1
Epc1	-9.49637e-17	-0.0272065	-0.110463	0.0401062	0.0447443	0.0447443	-2.36781e-15	-0.608044	-2.46875	1	0.543384	0.013831	1	1
Gm26510	-1.60029e-15	-0.076345	-0.109907	0.0399076	0.0445227	0.0445227	-4.00999e-14	-1.71474	-2.46856	1	0.0868994	0.0138382	1	1
Setx	2.38818e-16	-0.100118	-0.109536	0.0397766	0.0443765	0.0443765	6.00399e-15	-2.2561	-2.46834	1	0.0244173	0.0138467	1	1
Rspo2	-8.92402e-16	-0.0843086	-0.109767	0.0398664	0.0444767	0.0444767	-2.23848e-14	-1.89557	-2.46796	1	0.0584891	0.0138615	1	1
Gm22863	7.72087e-15	-0.0825465	-0.10977	0.0398759	0.0444873	0.0444873	1.93622e-13	-1.85551	-2.46745	1	0.0640054	0.0138811	1	1
Gm23953	7.72087e-15	-0.0825465	-0.10977	0.0398759	0.0444873	0.0444873	1.93622e-13	-1.85551	-2.46745	1	0.0640054	0.0138811	1	1
Gm24618	7.72087e-15	-0.0825465	-0.10977	0.0398759	0.0444873	0.0444873	1.93622e-13	-1.85551	-2.46745	1	0.0640054	0.0138811	1	1
Gm26332	7.72087e-15	-0.0825465	-0.10977	0.0398759	0.0444873	0.0444873	1.93622e-13	-1.85551	-2.46745	1	0.0640054	0.0138811	1	1
Golm1	-1.99877e-16	-0.189878	0.109567	0.0398185	0.0444233	0.0444233	-5.0197e-15	-4.27429	2.46642	1	2.22409e-05	0.0139204	1	0.639558
Ccdc88a	1.76629e-16	-0.110061	-0.109281	0.0397155	0.0443084	0.0443084	4.44737e-15	-2.48399	-2.46637	1	0.013259	0.0139223	1	1
4930441J16Rik	1.31418e-16	0.0685131	-0.110653	0.0402153	0.0448659	0.0448659	3.26786e-15	1.52706	-2.46631	1	0.127263	0.0139248	1	1
Spop	5.04527e-17	-0.115513	-0.109165	0.0396801	0.0442689	0.0442689	1.27149e-15	-2.60935	-2.46596	1	0.00929368	0.0139382	1	1
A730049H05Rik	3.85556e-16	-0.0440805	0.110627	0.0402227	0.0448742	0.0448742	9.58554e-15	-0.982312	2.46528	1	0.326335	0.0139645	1	1
Adcyap1r1	7.83761e-18	-0.235626	-0.106111	0.0385846	0.0430467	0.0430467	2.03128e-16	-5.47372	-2.46502	1	6.43979e-08	0.0139743	1	0.00189658
Olfr613	-1.87894e-16	-0.0728644	-0.109776	0.0399259	0.0445431	0.0445431	-4.70606e-15	-1.63582	-2.46448	1	0.102393	0.0139951	1	1
2810407A14Rik	-1.26648e-17	-0.0492782	-0.110049	0.0400301	0.0446593	0.0446593	-3.16382e-16	-1.10343	-2.4642	1	0.270277	0.0140062	1	1
Adam23	1.99443e-16	-0.263694	-0.105128	0.0382399	0.0426621	0.0426621	5.21557e-15	-6.18099	-2.4642	1	1.16471e-09	0.0140063	1	3.45105e-05
Dkkl1	-5.34909e-17	-0.114154	0.110339	0.0401372	0.0447789	0.0447789	-1.3327e-15	-2.54928	2.46409	1	0.0110376	0.0140104	1	1
1700054M17Rik	-7.26893e-17	0.0244271	-0.110537	0.0402114	0.0448616	0.0448616	-1.80768e-15	0.5445	-2.46395	1	0.586296	0.0140158	1	1
Scarf1	3.21968e-16	-0.0861279	0.110493	0.0401954	0.0448437	0.0448437	8.01008e-15	-1.92062	2.46395	1	0.0552444	0.0140159	1	1
Arhgef12	2.78115e-18	0.0249383	-0.110529	0.0402119	0.0448622	0.0448622	6.91622e-17	0.555886	-2.46375	1	0.578492	0.0140237	1	1
Lypd6	-6.50048e-17	-0.102722	0.110388	0.0401649	0.0448097	0.0448097	-1.61845e-15	-2.2924	2.46349	1	0.0222216	0.0140337	1	1
Atp6v0d2	-7.22677e-17	0.102935	-0.110384	0.0401644	0.0448092	0.0448092	-1.7993e-15	2.29719	-2.46342	1	0.0219452	0.0140362	1	1
Top2b	3.57721e-16	-0.124757	-0.108879	0.0396179	0.0441995	0.0441995	9.02928e-15	-2.82258	-2.46335	1	0.00491888	0.0140392	1	1
Mir686	3.69091e-16	-0.0494886	0.110536	0.0402235	0.0448751	0.0448751	9.176e-15	-1.10281	2.46318	1	0.270545	0.0140456	1	1
Mid1	1.26476e-16	0.107493	0.109156	0.0397329	0.0443278	0.0443278	3.18317e-15	2.42495	2.46247	1	0.0155993	0.0140732	1	1
Vps13b	3.64682e-16	-0.0851954	-0.109503	0.0398631	0.0444731	0.0444731	9.14835e-15	-1.91566	-2.46224	1	0.0558744	0.0140822	1	1
Rfx7	1.09255e-16	-0.125436	-0.108813	0.0396135	0.0441946	0.0441946	2.75802e-15	-2.83828	-2.46214	1	0.00468644	0.0140862	1	1
Gm3671	-3.99981e-16	0.142518	-0.10996	0.040046	0.0446771	0.0446771	-9.98803e-15	3.18997	-2.46122	1	0.00149574	0.0141219	1	1
Atf6b	-2.08702e-16	-0.157426	0.109751	0.0399846	0.0446086	0.0446086	-5.21957e-15	-3.52906	2.46032	1	0.000448376	0.014157	1	1
Lamb1	-9.41222e-18	-0.157792	-0.108038	0.0393652	0.0439176	0.0439176	-2.391e-16	-3.59291	-2.46002	1	0.000353338	0.0141688	1	1
2810403D21Rik	-8.55222e-17	0.0477271	0.109881	0.0400371	0.0446672	0.0446672	-2.13607e-15	1.0685	2.45999	1	0.285715	0.01417	1	1
Klhl2	1.76381e-16	0.0889989	0.109347	0.039843	0.0444506	0.0444506	4.42691e-15	2.0022	2.45998	1	0.0457048	0.0141704	1	1
Pde6g	1.09345e-16	0.0721797	0.109579	0.0399305	0.0445482	0.0445482	2.73839e-15	1.62026	2.45978	1	0.105692	0.0141781	1	1
Atp5d	-1.78835e-16	0.11776	0.108853	0.0396669	0.0442542	0.0442542	-4.50842e-15	2.66098	2.45973	1	0.00799607	0.0141802	1	1
Pcdhga2	-2.47705e-16	-0.0294395	-0.110019	0.0401014	0.0447389	0.0447389	-6.17697e-15	-0.65803	-2.45914	1	0.510767	0.0142033	1	1
Cacnb4	-1.61096e-16	-0.063231	-0.109659	0.0399725	0.0445951	0.0445951	-4.03016e-15	-1.41789	-2.459	1	0.156732	0.0142084	1	1
Zfp706	2.47674e-16	-0.00713461	0.110247	0.0401894	0.0448371	0.0448371	6.16267e-15	-0.159123	2.45883	1	0.873625	0.0142153	1	1
Rnf180	4.8509e-17	-0.104191	-0.109036	0.0397546	0.044352	0.044352	1.22021e-15	-2.34918	-2.45843	1	0.0191324	0.0142309	1	1
Dhx9	1.55597e-16	0.0397693	-0.11031	0.0402227	0.0448742	0.0448742	3.86839e-15	0.88624	-2.45821	1	0.375837	0.0142396	1	1
Aco1	9.18452e-17	-0.0462076	-0.109807	0.0400434	0.0446742	0.0446742	2.29364e-15	-1.03432	-2.45795	1	0.301394	0.0142498	1	1
Gm26852	6.5788e-17	-0.0114901	0.11022	0.0401965	0.044845	0.044845	1.63666e-15	-0.256218	2.45781	1	0.797869	0.0142553	1	1
Dync2h1	-8.03942e-17	-0.192283	-0.107027	0.0390531	0.0435694	0.0435694	-2.05858e-15	-4.41326	-2.45647	1	1.20378e-05	0.014308	1	0.347832
4930533I22Rik	1.03053e-16	-0.0518033	0.110193	0.0402245	0.0448763	0.0448763	2.56193e-15	-1.15436	2.45549	1	0.248804	0.0143467	1	1
Scn9a	-1.582e-16	-0.162293	-0.107705	0.0393289	0.043877	0.043877	-4.02248e-15	-3.69881	-2.4547	1	0.000236129	0.0143779	1	1
4930509E16Rik	1.6431e-16	0.0188915	0.109898	0.0401333	0.0447745	0.0447745	4.0941e-15	0.421926	2.45447	1	0.673227	0.014387	1	1
Adig	3.12373e-16	0.0913831	-0.110041	0.0401881	0.0448357	0.0448357	7.77277e-15	2.03818	-2.45432	1	0.0419621	0.0143931	1	1
Pomt1	-1.52208e-16	-0.0465401	-0.109627	0.0400431	0.0446739	0.0446739	-3.80111e-15	-1.04177	-2.45395	1	0.297928	0.0144078	1	1
Gm11748	2.7199e-16	-0.106619	0.109936	0.0401572	0.0448011	0.0448011	6.77314e-15	-2.37982	2.45387	1	0.0176268	0.0144108	1	1
Sh3bgrl	-1.52949e-16	-0.00311835	-0.109941	0.0401713	0.0448169	0.0448169	-3.80742e-15	-0.0695797	-2.45311	1	0.944551	0.0144412	1	1
Gm11924	3.33573e-16	-0.166365	-0.107513	0.0392945	0.0438386	0.0438386	8.48907e-15	-3.79495	-2.45246	1	0.000162384	0.0144667	1	1
Nhsl1	-9.87912e-16	-0.159201	0.109379	0.0399772	0.0446004	0.0446004	-2.47119e-14	-3.5695	2.45243	1	0.000385748	0.0144683	1	1
Olfr550	-2.18261e-16	-0.108012	0.109862	0.040154	0.0447976	0.0447976	-5.43559e-15	-2.41112	2.45241	1	0.0161978	0.0144687	1	1
Gclc	3.32401e-17	-0.0752187	0.11001	0.040211	0.0448612	0.0448612	8.26643e-16	-1.6767	2.45222	1	0.0941128	0.0144763	1	1
Gm27185	6.90712e-16	-0.099753	0.109903	0.0401725	0.0448182	0.0448182	1.71936e-14	-2.22572	2.45219	1	0.0263968	0.0144776	1	1
Rmdn1	-2.29434e-16	-0.235858	-0.105557	0.0385868	0.0430491	0.0430491	-5.94591e-15	-5.4788	-2.45201	1	6.26602e-08	0.0144847	1	0.00184566
Gm5111	3.47821e-16	-0.00741464	-0.109854	0.0401623	0.0448068	0.0448068	8.66038e-15	-0.16548	-2.45173	1	0.868621	0.0144961	1	1
Armc2	3.24067e-17	-0.106459	-0.108701	0.0397424	0.0443384	0.0443384	8.1542e-16	-2.40105	-2.45162	1	0.0166457	0.0145004	1	1
Gm25844	5.83912e-16	-0.106608	0.10981	0.0401575	0.0448015	0.0448015	1.45405e-14	-2.37956	2.45104	1	0.0176391	0.0145234	1	1
Gnb4	-1.57769e-16	-0.0586829	-0.109286	0.0399949	0.0446201	0.0446201	-3.94474e-15	-1.31517	-2.44925	1	0.188947	0.0145951	1	1
Wdfy3	3.20124e-17	-0.145248	-0.107836	0.0394703	0.0440348	0.0440348	8.1105e-16	-3.29849	-2.44888	1	0.00102854	0.0146101	1	1
Git1	-2.15015e-15	-0.0374498	0.109884	0.0402233	0.0448749	0.0448749	-5.34554e-14	-0.834538	2.44868	1	0.404304	0.0146181	1	1
Kmt2e	9.14597e-17	-0.064737	-0.109172	0.0399683	0.0445904	0.0445904	2.2883e-15	-1.45181	-2.44832	1	0.147067	0.0146323	1	1
1110036E04Rik	-2.38009e-16	0.0684565	-0.109818	0.040218	0.044869	0.044869	-5.91798e-15	1.5257	-2.44753	1	0.127603	0.0146645	1	1
Mapk7	-1.36727e-15	0.0484211	0.109316	0.0400374	0.0446675	0.0446675	-3.41498e-14	1.08403	2.44732	1	0.278777	0.0146729	1	1
Mkl2	1.23453e-16	0.131933	0.108043	0.0395714	0.0441476	0.0441476	3.11975e-15	2.98845	2.44731	1	0.00291657	0.0146731	1	1
Mdm4	-3.9737e-16	-0.0670842	-0.109076	0.0399579	0.0445788	0.0445788	-9.94472e-15	-1.50484	-2.44682	1	0.132881	0.0146929	1	1
Gm25147	-1.49676e-16	-0.0700928	0.109779	0.0402168	0.0448676	0.0448676	-3.72172e-15	-1.56222	2.44673	1	0.118755	0.0146964	1	1
Grpel1	-5.79454e-16	0.0185901	0.109545	0.0401358	0.0447773	0.0447773	-1.44373e-14	0.415169	2.44644	1	0.678164	0.0147082	1	1
Tomm40	2.98717e-16	-0.0304057	0.109731	0.0402197	0.0448709	0.0448709	7.42712e-15	-0.677626	2.44549	1	0.498265	0.0147468	1	1
Gm15542	2.02382e-16	0.0104168	0.10953	0.0401568	0.0448007	0.0448007	5.03981e-15	0.232515	2.44483	1	0.816216	0.0147735	1	1
Evl	-2.19111e-16	0.0465644	-0.109676	0.0402265	0.0448785	0.0448785	-5.44693e-15	1.03757	-2.44385	1	0.299882	0.0148134	1	1
Reln	-3.9268e-16	-0.0920141	-0.108586	0.0398305	0.0444366	0.0444366	-9.85879e-15	-2.07068	-2.44361	1	0.038808	0.0148229	1	1
Gm26857	1.41465e-16	-0.103585	-0.108397	0.0397624	0.0443607	0.0443607	3.55777e-15	-2.33506	-2.44354	1	0.0198634	0.0148257	1	1
Gm25134	-1.30377e-15	-0.118286	0.109386	0.0401281	0.0447687	0.0447687	-3.24901e-14	-2.64217	2.44337	1	0.00844877	0.0148328	1	1
L1MdA_II	-2.79076e-17	0.0355387	-0.109638	0.0402233	0.0448749	0.0448749	-6.93816e-16	0.79195	-2.44319	1	0.428697	0.0148399	1	1
Ifi27l2b	-3.69239e-16	0.0201237	-0.109582	0.0402107	0.0448608	0.0448608	-9.18262e-15	0.448581	-2.4427	1	0.653893	0.01486	1	1
MER95	-2.78657e-16	0.0739871	-0.109531	0.0402138	0.0448643	0.0448643	-6.92939e-15	1.64913	-2.44139	1	0.0996351	0.0149134	1	1
Slco3a1	-1.26394e-16	-0.180898	0.108594	0.0398701	0.0444808	0.0444808	-3.17014e-15	-4.06688	2.44137	1	5.38851e-05	0.0149144	1	1
Gm15178	1.46915e-15	-0.0276617	-0.109235	0.0401109	0.0447495	0.0447495	3.66271e-14	-0.618146	-2.44102	1	0.53671	0.0149285	1	1
Polr2c	4.99092e-16	0.0066214	0.109361	0.0401664	0.0448114	0.0448114	1.24256e-14	0.147762	2.44048	1	0.88258	0.0149509	1	1
Kdm4c	1.0645e-15	-0.0874923	-0.108506	0.0398565	0.0444657	0.0444657	2.67084e-14	-1.96764	-2.44022	1	0.0495616	0.0149613	1	1
Gm26446	1.62585e-16	0.0692784	0.108739	0.0399494	0.0445693	0.0445693	4.06976e-15	1.5544	2.43977	1	0.120608	0.0149797	1	1
Fam124a	8.03873e-17	-0.0242472	-0.109197	0.0401214	0.0447612	0.0447612	2.0036e-15	-0.541701	-2.43956	1	0.588222	0.0149887	1	1
Lrrc69	-1.00933e-16	-0.0920325	0.109363	0.0401889	0.0448365	0.0448365	-2.51148e-15	-2.05262	2.43914	1	0.0405345	0.0150057	1	1
Fam208a	1.43068e-16	-0.237607	-0.104956	0.0385711	0.0430317	0.0430317	3.7092e-15	-5.52167	-2.43904	1	4.97048e-08	0.0150099	1	0.0014646
Dgat2	-2.59798e-16	0.158382	0.107116	0.039367	0.0439196	0.0439196	-6.59938e-15	3.60618	2.43891	1	0.000336118	0.0150155	1	1
Acad9	-2.55512e-16	-0.16622	-0.106924	0.0393002	0.043845	0.043845	-6.50154e-15	-3.79109	-2.43868	1	0.000164865	0.0150249	1	1
Fam49b	1.83605e-16	-0.0775843	-0.108565	0.0399091	0.0445244	0.0445244	4.60057e-15	-1.74251	-2.43834	1	0.081922	0.0150389	1	1
Gm14565	-5.9905e-16	-0.135244	-0.107577	0.0395498	0.0441235	0.0441235	-1.51467e-14	-3.06512	-2.43808	1	0.0022718	0.0150493	1	1
Kctd8	6.05671e-17	-0.00301471	-0.109263	0.0401746	0.0448206	0.0448206	1.5076e-15	-0.0672618	-2.43779	1	0.946395	0.0150614	1	1
Tenm2	3.38899e-17	-0.231694	-0.105085	0.0386403	0.0431089	0.0431089	8.77061e-16	-5.37464	-2.43766	1	1.09312e-07	0.0150669	1	0.00321595
Gm14286	9.00344e-17	-0.136391	0.108961	0.0400707	0.0447046	0.0447046	2.24689e-15	-3.05093	2.43735	1	0.00238026	0.0150796	1	1
A830008E24Rik	1.96496e-16	-0.148204	-0.107254	0.0394507	0.0440129	0.0440129	4.98081e-15	-3.36729	-2.43689	1	0.000806799	0.0150987	1	1
2010013B24Rik	3.72568e-16	0.116855	-0.109079	0.0401329	0.044774	0.044774	9.28335e-15	2.60988	-2.4362	1	0.00927947	0.015127	1	1
Bcl2	-3.12425e-16	-0.00909611	-0.109148	0.0401617	0.0448061	0.0448061	-7.77918e-15	-0.20301	-2.43599	1	0.839195	0.0151356	1	1
Adamts10	-3.13203e-16	-0.0793925	-0.108428	0.0399006	0.0445148	0.0445148	-7.8496e-15	-1.78351	-2.43577	1	0.0750001	0.0151451	1	1
Lgalsl	-1.13849e-15	0.00509103	-0.109211	0.0401904	0.0448382	0.0448382	-2.83274e-14	0.113542	-2.43566	1	0.909638	0.0151494	1	1
Gm16353	-1.46592e-15	0.0555057	-0.109308	0.0402269	0.0448789	0.0448789	-3.64415e-14	1.23679	-2.43563	1	0.216641	0.0151508	1	1
Pde4dip	1.23162e-16	0.294427	0.1028	0.0378335	0.0422087	0.0422087	3.25536e-15	6.97549	2.43552	1	7.94566e-12	0.0151551	1	2.36264e-07
Csde1	4.44562e-16	0.0417363	0.108821	0.0400655	0.0446988	0.0446988	1.10959e-14	0.933724	2.43453	1	0.350815	0.0151965	1	1
Gm26813	2.6507e-16	-0.108702	0.109057	0.0401544	0.044798	0.044798	6.60127e-15	-2.4265	2.43441	1	0.0155336	0.0152015	1	1
Neil3	-1.08671e-17	-0.123434	-0.10764	0.0396356	0.0442192	0.0442192	-2.74175e-16	-2.79141	-2.43423	1	0.00541191	0.015209	1	1
Gm20541	5.82983e-18	-0.163251	-0.106739	0.0393277	0.0438757	0.0438757	1.48237e-16	-3.72076	-2.43276	1	0.000216937	0.0152703	1	1
Skint10	1.30342e-15	-0.0275327	-0.108866	0.0401131	0.044752	0.044752	3.24936e-14	-0.615228	-2.43265	1	0.538634	0.0152749	1	1
Fnbp4	-4.18381e-16	0.0261339	-0.109132	0.0402186	0.0448697	0.0448697	-1.04027e-14	0.582441	-2.43221	1	0.560485	0.0152933	1	1
Zkscan16	1.08232e-16	-0.104449	-0.107832	0.0397606	0.0443587	0.0443587	2.72209e-15	-2.35464	-2.43091	1	0.0188562	0.0153477	1	1
Nup188	-3.53616e-16	0.0515092	-0.109083	0.0402285	0.0448807	0.0448807	-8.7902e-15	1.14769	-2.43052	1	0.251545	0.0153641	1	1
Stam2	-2.88914e-15	-0.1128	-0.107666	0.039708	0.0443	0.0443	-7.27596e-14	-2.54627	-2.43037	1	0.0111324	0.0153701	1	1
Gpbp1	-3.12659e-16	0.0820401	-0.109015	0.0402056	0.0448552	0.0448552	-7.77649e-15	1.829	-2.43037	1	0.067887	0.0153701	1	1
Olfr324	-1.33168e-16	-0.086095	0.108992	0.0401998	0.0448487	0.0448487	-3.31264e-15	-1.91968	2.43022	1	0.0553639	0.0153764	1	1
Gm11912	-2.32196e-16	-0.0495291	0.109056	0.0402288	0.044881	0.044881	-5.77189e-15	-1.10356	2.42989	1	0.270217	0.0153906	1	1
Hist2h4	-5.80483e-17	-0.119342	0.108762	0.0401265	0.0447669	0.0447669	-1.44663e-15	-2.66585	2.42952	1	0.00788262	0.0154062	1	1
Kcnj6	-1.35096e-16	0.112398	0.10763	0.0397109	0.0443032	0.0443032	-3.40198e-15	2.53703	2.42939	1	0.0114275	0.0154113	1	1
Kmt2c	6.64929e-17	-0.107366	-0.107714	0.0397429	0.044339	0.044339	1.67307e-15	-2.42149	-2.42933	1	0.0157471	0.015414	1	1
Kif1a	3.30967e-17	0.0464692	-0.109029	0.0402288	0.0448811	0.0448811	8.22711e-16	1.03538	-2.42929	1	0.300899	0.0154157	1	1
Dnaja3	-6.23328e-17	-0.0871451	0.108908	0.0401984	0.0448471	0.0448471	-1.55063e-15	-1.94316	2.42842	1	0.0524557	0.0154522	1	1
2410017I17Rik	-6.57809e-17	0.00265473	-0.108862	0.0401875	0.044835	0.044835	-1.63685e-15	0.059211	-2.42806	1	0.952803	0.0154676	1	1
Gm22077	-1.82818e-16	-0.0131716	0.108839	0.0402048	0.0448543	0.0448543	-4.54717e-15	-0.293654	2.4265	1	0.769122	0.0155334	1	1
Cebpd	-1.61511e-15	-0.0779597	0.108829	0.0402115	0.0448617	0.0448617	-4.01655e-14	-1.73778	2.42587	1	0.0827537	0.0155602	1	1
Cpm	8.16293e-17	-0.106917	0.108667	0.0401597	0.0448039	0.0448039	2.03262e-15	-2.38634	2.42539	1	0.0173204	0.0155805	1	1
Gm26366	1.21639e-16	-0.0351905	-0.108455	0.0400904	0.0447266	0.0447266	3.03411e-15	-0.786791	-2.42485	1	0.43171	0.0156038	1	1
Gm13410	-1.7922e-16	-0.0144339	-0.108594	0.0401512	0.0447945	0.0447945	-4.46362e-15	-0.322225	-2.42427	1	0.747392	0.0156284	1	1
Serpine2	2.03455e-16	-0.140485	-0.106804	0.0395151	0.0440848	0.0440848	5.14878e-15	-3.18669	-2.4227	1	0.00151251	0.0156954	1	1
Gm29514	2.367e-17	-0.130388	-0.106996	0.0395899	0.0441683	0.0441683	5.97879e-16	-2.95207	-2.42245	1	0.00327764	0.0157059	1	1
Parm1	6.77848e-17	-0.111745	-0.107313	0.0397172	0.0443103	0.0443103	1.70668e-15	-2.52187	-2.42185	1	0.0119262	0.0157318	1	1
Gm13121	2.14644e-16	-0.00669277	-0.108528	0.04017	0.0448154	0.0448154	5.34339e-15	-0.149341	-2.42167	1	0.881334	0.0157396	1	1
Kcnip3	8.72997e-18	0.190886	0.105519	0.0390791	0.0435984	0.0435984	2.23392e-16	4.37829	2.42025	1	1.40711e-05	0.0158004	1	0.406119
Pcdh8	6.33757e-16	0.575374	0.0857693	0.0317769	0.0354517	0.0354517	1.9944e-14	16.2298	2.41933	1	1.62077e-49	0.01584	1	4.84774e-45
Gm23612	1.31704e-16	-0.109032	0.108379	0.0401552	0.0447989	0.0447989	3.27988e-15	-2.4338	2.41924	1	0.0152269	0.0158442	1	1
Gm27013	1.25487e-15	-0.0296785	-0.108249	0.0401095	0.0447479	0.0447479	3.1286e-14	-0.663237	-2.41909	1	0.507429	0.0158505	1	1
B4galt1	-1.76686e-16	0.244892	0.103848	0.0384923	0.0429437	0.0429437	-4.59016e-15	5.70263	2.41824	1	1.83829e-08	0.0158871	1	0.000542662
Zfp410	-8.45127e-17	0.0509859	-0.108532	0.0402305	0.0448829	0.0448829	-2.10071e-15	1.13598	-2.41812	1	0.256412	0.0158923	1	1
Gm20462	-2.31512e-16	0.0314717	-0.108513	0.0402252	0.044877	0.044877	-5.75538e-15	0.701288	-2.41801	1	0.48339	0.015897	1	1
A230059L01Rik	4.52882e-18	-0.109646	-0.107125	0.0397321	0.0443269	0.0443269	1.13984e-16	-2.47358	-2.41671	1	0.0136474	0.0159535	1	1
Psmd7	-1.92751e-16	0.00456771	-0.10833	0.0401933	0.0448414	0.0448414	-4.79561e-15	0.101864	-2.41584	1	0.918898	0.0159913	1	1
Gm26043	1.43244e-16	0.0288403	0.108109	0.0401128	0.0447516	0.0447516	3.57102e-15	0.644454	2.41575	1	0.519523	0.0159952	1	1
2010009K17Rik	-1.6984e-16	0.0559226	-0.108401	0.0402298	0.0448822	0.0448822	-4.22175e-15	1.24599	-2.41524	1	0.213246	0.0160172	1	1
Axl	-1.24244e-16	-0.0742254	0.108346	0.0402172	0.0448681	0.0448681	-3.08932e-15	-1.6543	2.41476	1	0.0985798	0.0160383	1	1
Gpr39	-3.23009e-16	0.0713056	-0.10835	0.0402202	0.0448714	0.0448714	-8.03101e-15	1.58911	-2.41468	1	0.112553	0.0160418	1	1
Zfp276	1.57377e-16	-0.0472413	0.108361	0.0402313	0.0448838	0.0448838	3.9118e-15	-1.05252	2.41425	1	0.292975	0.0160606	1	1
Oprm1	-2.7275e-16	-0.0709126	-0.10756	0.0399482	0.044568	0.044568	-6.82759e-15	-1.59111	-2.41339	1	0.112102	0.0160981	1	1
Cacng7	3.94716e-16	0.0109476	-0.108222	0.0402041	0.0448535	0.0448535	9.81779e-15	0.244074	-2.41279	1	0.807255	0.0161246	1	1
Gm5127	-3.4657e-17	-0.113573	-0.106849	0.0397082	0.0443002	0.0443002	-8.72793e-16	-2.56371	-2.41194	1	0.0105942	0.0161616	1	1
Foxr1	-7.22666e-16	-0.147542	0.107707	0.0400302	0.0446595	0.0446595	-1.8053e-14	-3.3037	2.41173	1	0.00100994	0.0161707	1	1
Rpl36-ps2	4.11746e-17	0.0503823	-0.108244	0.0402316	0.0448841	0.0448841	1.02344e-15	1.1225	-2.41164	1	0.262092	0.016175	1	1
Acvr1	-6.58987e-16	0.110552	0.106881	0.0397278	0.0443221	0.0443221	-1.65876e-14	2.49429	2.41147	1	0.0128839	0.0161825	1	1
Gm3604	7.95843e-16	-0.183688	-0.105302	0.0391511	0.0436788	0.0436788	2.03275e-14	-4.20542	-2.41082	1	2.99619e-05	0.0162108	1	0.859493
Sntg1	2.20455e-16	0.0338243	-0.108178	0.040228	0.0448801	0.0448801	5.48014e-15	0.753658	-2.41039	1	0.451345	0.0162299	1	1
Gm12279	-2.23945e-16	-0.00806971	-0.108009	0.0401692	0.0448146	0.0448146	-5.57504e-15	-0.180069	-2.41014	1	0.857158	0.0162408	1	1
1700092C17Rik	-4.98879e-16	-0.0306535	-0.10782	0.0401085	0.0447468	0.0447468	-1.24382e-14	-0.685043	-2.40956	1	0.493576	0.0162664	1	1
Wdr90	-4.99967e-17	-0.0264173	0.108109	0.0402229	0.0448744	0.0448744	-1.24299e-15	-0.588694	2.40915	1	0.556284	0.0162844	1	1
Ints3	3.01788e-17	-0.0481897	-0.107622	0.0400473	0.0446785	0.0446785	7.5358e-16	-1.07859	-2.40881	1	0.281197	0.0162996	1	1
Gucy1b3	5.61511e-16	-0.130524	-0.106388	0.0395931	0.0441718	0.0441718	1.4182e-14	-2.95491	-2.4085	1	0.00324806	0.0163134	1	1
Polr1a	1.80398e-16	-0.057928	0.108099	0.0402301	0.0448825	0.0448825	4.48414e-15	-1.29066	2.40849	1	0.19731	0.0163136	1	1
Prodh2	7.75405e-16	-0.153527	0.107494	0.0400054	0.0446318	0.0446318	1.93825e-14	-3.43985	2.40846	1	0.000621696	0.0163151	1	1
Fsip1	7.09731e-18	0.033838	-0.108054	0.0402284	0.0448806	0.0448806	1.76425e-16	0.753956	-2.40758	1	0.451166	0.0163542	1	1
Zufsp	-5.4252e-17	-0.123511	-0.106465	0.0396429	0.0442274	0.0442274	-1.36852e-15	-2.79264	-2.40723	1	0.00539172	0.0163697	1	1
Lect1	-3.33183e-16	-0.0261907	-0.107747	0.0401227	0.0447626	0.0447626	-8.30411e-15	-0.585101	-2.40708	1	0.558696	0.016376	1	1
Mir23b	-1.63904e-16	-0.031858	0.108019	0.0402274	0.0448794	0.0448794	-4.07444e-15	-0.709857	2.40687	1	0.478064	0.0163856	1	1
Sfxn4	-2.79023e-17	-0.181955	0.107043	0.039866	0.0444763	0.0444763	-6.99901e-16	-4.09105	2.40673	1	4.86993e-05	0.0163917	1	1
Zbtb10	-2.74303e-16	-0.0081068	-0.107851	0.0401699	0.0448153	0.0448153	-6.82857e-15	-0.180894	-2.40656	1	0.856511	0.0163993	1	1
Gm5108	8.57725e-16	-0.0513315	-0.107469	0.0400356	0.0446655	0.0446655	2.1424e-14	-1.14924	-2.40609	1	0.250906	0.0164203	1	1
Foxj3	5.46329e-17	0.0259677	-0.107971	0.0402231	0.0448746	0.0448746	1.35825e-15	0.578672	-2.40607	1	0.563024	0.0164212	1	1
Mcam	-5.1428e-17	-0.0622765	0.10798	0.0402283	0.0448805	0.0448805	-1.2784e-15	-1.38761	2.40594	1	0.165763	0.0164268	1	1
Tm9sf1	-9.35552e-19	-0.128527	0.107567	0.0401006	0.044738	0.044738	-2.33301e-17	-2.87289	2.40436	1	0.00420864	0.0164972	1	1
Zc3h12d	5.78289e-16	-0.0615254	-0.107264	0.0399935	0.0446185	0.0446185	1.44596e-14	-1.37892	-2.40402	1	0.168424	0.0165126	1	1
Gm26811	-2.29234e-16	-0.00894355	-0.107702	0.0401686	0.0448139	0.0448139	-5.70679e-15	-0.199571	-2.40331	1	0.841883	0.0165444	1	1
Gm9946	-5.68428e-16	-0.0868562	-0.106895	0.0398697	0.0444804	0.0444804	-1.42572e-14	-1.95269	-2.4032	1	0.0513131	0.0165494	1	1
Dnm1	3.02825e-16	-0.174794	-0.105188	0.0392357	0.0437731	0.0437731	7.7181e-15	-3.99318	-2.40303	1	7.31278e-05	0.0165568	1	1
Hoxb3	-3.2202e-16	-0.0559455	0.107847	0.0402317	0.0448843	0.0448843	-8.00413e-15	-1.24644	2.40277	1	0.213081	0.0165686	1	1
Gm2415	3.10166e-17	-0.010308	-0.107664	0.0401656	0.0448106	0.0448106	7.72217e-16	-0.230036	-2.40265	1	0.818141	0.0165738	1	1
Gm11808	-2.29298e-16	0.106084	-0.107655	0.0401642	0.0448089	0.0448089	-5.70901e-15	2.36748	-2.40254	1	0.0182201	0.0165791	1	1
Rnf207	1.51269e-16	-0.0663495	0.10782	0.0402261	0.044878	0.044878	3.76048e-15	-1.47844	2.4025	1	0.139805	0.0165806	1	1
4930544M13Rik	-1.30242e-16	-0.0104327	-0.107643	0.0401654	0.0448103	0.0448103	-3.24264e-15	-0.232818	-2.4022	1	0.815981	0.0165944	1	1
Dclre1b	-1.34585e-16	-0.140579	-0.105911	0.0395206	0.0440909	0.0440909	-3.40544e-15	-3.18839	-2.40211	1	0.0015038	0.0165983	1	1
Gm5389	4.10354e-16	-0.0144072	0.107696	0.0402113	0.0448615	0.0448615	1.0205e-14	-0.321149	2.40063	1	0.748207	0.0166647	1	1
Adamts1	-4.03347e-16	-0.00445142	0.107655	0.040196	0.0448444	0.0448444	-1.00345e-14	-0.0992637	2.40063	1	0.920961	0.0166648	1	1
Cyp4x1	3.09699e-17	-0.0588475	-0.107124	0.040006	0.0446325	0.0446325	7.7413e-16	-1.31849	-2.40012	1	0.187834	0.0166877	1	1
Trafd1	3.35496e-16	-0.235373	-0.103368	0.0386119	0.0430771	0.0430771	8.68893e-15	-5.46398	-2.3996	1	6.78605e-08	0.0167116	1	0.00199842
Tmem11	-2.10443e-17	0.0390653	0.107285	0.0400829	0.0447183	0.0447183	-5.2502e-16	0.873585	2.39913	1	0.382687	0.0167327	1	1
Amotl1	5.93733e-17	-0.0480619	-0.107175	0.0400501	0.0446817	0.0446817	1.48247e-15	-1.07565	-2.39863	1	0.282508	0.0167553	1	1
Gm13339	1.76375e-16	-0.00104193	-0.107518	0.0401864	0.0448337	0.0448337	4.38893e-15	-0.02324	-2.39816	1	0.981466	0.0167767	1	1
Dynlt1c	-8.47708e-17	-0.254455	-0.102674	0.0383829	0.0428216	0.0428216	-2.20856e-15	-5.94221	-2.39771	1	4.72562e-09	0.016797	1	0.000139727
Gm20302	1.23322e-16	-0.03192	0.107586	0.0402291	0.0448813	0.0448813	3.06549e-15	-0.71121	2.39712	1	0.477226	0.0168239	1	1
Rpl27-ps2	9.01019e-17	0.122198	-0.107285	0.0401213	0.0447611	0.0447611	2.24574e-15	2.73	-2.39684	1	0.00651598	0.0168368	1	1
[truncated: 27,917 more rows]
